# Supplementary material
Source: Research Square preprint supplement (doi:10.21203/rs.3.rs-9277431/v1)
Supplement: Supplementary file 1 [file c886105320f6f167dfa07fee.docx]

**Supplementary Table 1.** Differentially expressed cell wall-related processes genes in 35S:AXE/XYL.

| **S.no** | **ID** | **Description** | **log2FoldChange** |
| --- | --- | --- | --- |
| 1 | AT2G38540 | lipid transfer protein 1(LP1) | 2.950649091 |
| 2 | AT1G35140 | Phosphate-responsive 1 family protein(PHI-1) | 2.837951212 |
| 3 | AT4G02330 | Plant invertase/pectin methylesterase inhibitor superfamily(ATPMEPCRB) | 2.373108367 |
| 4 | AT5G47500 | Pectin lyase-like superfamily protein(PME5) | 2.229123502 |
| 5 | AT4G30280 | xyloglucan endotransglucosylase/hydrolase 18(XTH18) | 2.119135364 |
| 6 | AT3G08030 | DNA-directed RNA polymerase subunit beta (Protein of unknown function, DUF642)(AT3G08030) | 2.009816691 |
| 7 | AT1G78850 | D-mannose binding lectin protein with Apple-like carbohydrate-binding domain-containing protein(AT1G78850) | 2.006516539 |
| 8 | AT1G02810 | Plant invertase/pectin methylesterase inhibitor superfamily(AT1G02810) | 2.002730711 |
| 9 | AT4G32460 | choice-of-anchor C domain protein, putative (Protein of unknown function, DUF642)(AT4G32460) | 1.959155167 |
| 10 | AT4G08950 | Phosphate-responsive 1 family protein(EXO) | 1.940663203 |
| 11 | AT3G29030 | expansin A5(EXPA5) | 1.866625304 |
| 12 | AT1G11545 | xyloglucan endotransglucosylase/hydrolase 8(XTH8) | 1.865092416 |
| 13 | AT3G10720 | Plant invertase/pectin methylesterase inhibitor superfamily(AT3G10720) | 1.862662468 |
| 14 | AT2G28790 | Pathogenesis-related thaumatin superfamily protein(AT2G28790) | 1.795230044 |
| 15 | AT1G10640 | Pectin lyase-like superfamily protein(AT1G10640) | 1.773908635 |
| 16 | AT4G03210 | xyloglucan endotransglucosylase/hydrolase 9(XTH9) | 1.748666782 |
| 17 | AT3G45960 | expansin-like A3(EXLA3) | 1.725310709 |
| 18 | AT3G45970 | expansin-like A1(EXLA1) | 1.711523813 |
| 19 | AT5G55730 | FASCICLIN-like arabinogalactan 1(FLA1) | 1.7008266 |
| 20 | AT5G57560 | Xyloglucan endotransglucosylase/hydrolase family protein(TCH4) | 1.660377368 |
| 21 | AT5G07030 | Eukaryotic aspartyl protease family protein(AT5G07030) | 1.658178906 |
| 22 | AT1G64760 | O-Glycosyl hydrolases family 17 protein(AT1G64760) | 1.637164314 |
| 23 | AT4G18670 | Leucine-rich repeat (LRR) family protein(AT4G18670) | 1.622954064 |
| 24 | AT5G03350 | Legume lectin family protein(AT5G03350) | 1.616933538 |
| 25 | AT2G20750 | expansin B1(EXPB1) | 1.615360992 |
| 26 | AT2G28950 | expansin A6(EXPA6) | 1.613963913 |
| 27 | AT1G62440 | leucine-rich repeat/extensin 2(LRX2) | 1.585010297 |
| 28 | AT5G26670 | Pectinacetylesterase family protein(AT5G26670) | 1.534896875 |
| 29 | AT1G20190 | expansin 11(EXPA11) | 1.528280466 |
| 30 | AT2G02100 | low-molecular-weight cysteine-rich 69(LCR69) | 1.512401478 |
| 31 | AT4G30290 | xyloglucan endotransglucosylase/hydrolase 19(XTH19) | 1.509034478 |
| 32 | AT3G23730 | xyloglucan endotransglucosylase/hydrolase 16(XTH16) | 1.48263412 |
| 33 | AT1G01900 | subtilase family protein(SBTI1.1) | 1.460419339 |
| 34 | AT4G20830 | FAD-binding Berberine family protein(AT4G20830) | 1.435850166 |
| 35 | AT2G39700 | expansin A4(EXPA4) | 1.434104747 |
| 36 | AT4G29360 | O-Glycosyl hydrolases family 17 protein(AT4G29360) | 1.426031048 |
| 37 | AT1G09750 | Eukaryotic aspartyl protease family protein(AT1G09750) | 1.417364006 |
| 38 | AT5G63810 | beta-galactosidase 10(BGAL10) | 1.358036283 |
| 39 | AT1G76160 | SKU5 similar 5(sks5) | 1.351021662 |
| 40 | AT5G67270 | end binding protein 1C(EB1C) | 1.344437974 |
| 41 | AT5G47550 | Cystatin/monellin superfamily protein(AT5G47550) | 1.331667579 |
| 42 | AT4G36360 | beta-galactosidase 3(BGAL3) | 1.303584996 |
| 43 | AT5G25460 | transmembrane protein, putative (Protein of unknown function, DUF642)(DGR2) | 1.299793403 |
| 44 | AT1G28290 | arabinogalactan protein 31(AGP31) | 1.291924961 |
| 45 | AT4G14310 | Transducin/WD40 repeat-like superfamily protein(AT4G14310) | 1.286241972 |
| 46 | AT1G70370 | polygalacturonase 2(PG2) | 1.284809749 |
| 47 | AT3G55430 | O-Glycosyl hydrolases family 17 protein(AT3G55430) | 1.283655685 |
| 48 | AT3G54400 | Eukaryotic aspartyl protease family protein(AT3G54400) | 1.263431738 |
| 49 | AT1G16130 | wall associated kinase-like 2(WAKL2) | 1.247921285 |
| 50 | AT2G38870 | Serine protease inhibitor, potato inhibitor I-type family protein(AT2G38870) | 1.211800994 |
| 51 | AT1G27950 | glycosylphosphatidylinositol-anchored lipid protein transfer 1(LTPG1) | 1.175219761 |
| 52 | AT5G56320 | expansin A14(EXPA14) | 1.171625515 |
| 53 | AT5G11420 | transmembrane protein, putative (Protein of unknown function, DUF642)(AT5G11420) | 1.170402844 |
| 54 | AT4G14940 | amine oxidase 1(AO1) | 1.16815451 |
| 55 | AT2G20870 | cell wall protein precursor(AT2G20870) | 1.165345946 |
| 56 | AT1G41830 | SKU5-similar 6(SKS6) | 1.153664685 |
| 57 | AT3G15356 | Legume lectin family protein(AT3G15356) | 1.143493659 |
| 58 | AT4G23820 | Pectin lyase-like superfamily protein(AT4G23820) | 1.126248593 |
| 59 | AT1G45130 | beta-galactosidase 5(BGAL5) | 1.115691805 |
| 60 | AT1G68560 | alpha-xylosidase 1(XYL1) | 1.103632633 |
| 61 | AT3G18080 | B-S glucosidase 44(BGLU44) | 1.085754573 |
| 62 | AT5G51550 | EXORDIUM like 3(EXL3) | 1.080882415 |
| 63 | AT1G01300 | Eukaryotic aspartyl protease family protein(AT1G01300) | 1.058971226 |
| 64 | AT1G04040 | HAD superfamily, subfamily IIIB acid phosphatase(AT1G04040) | 1.019492168 |
| 65 | AT1G05260 | Peroxidase superfamily protein(RCI3) | 1.017563086 |
| 66 | AT1G53840 | pectin methylesterase 1(PME1) | 1.014813236 |
| 67 | AT2G29550 | tubulin beta-7 chain(TUB7) | 1.009939404 |

**Supplementary Table 2.** Differentially expressed defense-related genes in 35S:AXE/XYL.

| S.no | ID | Description | log2FoldChange |
| --- | --- | --- | --- |
| 1 | AT3G48520 | cytochrome P450, family 94, subfamily B, polypeptide 3(CYP94B3) | 3.724545492 |
| 2 | AT5G52020 | Integrase-type DNA-binding superfamily protein(AT5G52020) | 2.822478491 |
| 3 | AT1G24020 | MLP-like protein 423(MLP423) | 2.388289166 |
| 4 | AT2G36450 | Integrase-type DNA-binding superfamily protein(HRD) | 2.366988033 |
| 5 | AT1G65390 | phloem protein 2 A5(PP2-A5) | 2.217313996 |
| 6 | AT1G80820 | cinnamoyl coa reductase(CCR2) | 2.15404614 |
| 7 | AT5G13220 | jasmonate-zim-domain protein 10(JAZ10) | 2.108654029 |
| 8 | AT2G27080 | Late embryogenesis abundant (LEA) hydroxyproline-rich glycoprotein family(AT2G27080) | 1.979306317 |
| 9 | AT1G18250 | Pathogenesis-related thaumatin superfamily protein(ATLP-1) | 1.972539881 |
| 10 | AT1G43160 | uncharacterized protein(RAP2.6) | 1.964284102 |
| 11 | AT4G14370 | Disease resistance protein (TIR-NBS-LRR class) family(AT4G14370) | 1.962060474 |
| 12 | AT2G34600 | jasmonate-zim-domain protein 7(JAZ7) | 1.911525484 |
| 13 | AT3G54560 | histone H2A 11(HTA11) | 1.899418029 |
| 14 | AT4G23810 | WRKY family transcription factor(WRKY53) | 1.810003126 |
| 15 | AT2G28790 | Pathogenesis-related thaumatin superfamily protein(AT2G28790) | 1.795230044 |
| 16 | AT1G02660 | alpha/beta-Hydrolases superfamily protein(AT1G02660) | 1.75703157 |
| 17 | AT1G30135 | jasmonate-zim-domain protein 8(JAZ8) | 1.731629127 |
| 18 | AT1G80840 | WRKY DNA-binding protein 40(WRKY40) | 1.679028094 |
| 19 | AT5G36925 | uncharacterized protein(AT5G36925) | 1.674968401 |
| 20 | AT1G64760 | O-Glycosyl hydrolases family 17 protein(AT1G64760) | 1.637164314 |
| 21 | AT5G64750 | Integrase-type DNA-binding superfamily protein(ABR1) | 1.631050287 |
| 22 | AT5G03350 | Legume lectin family protein(AT5G03350) | 1.616933538 |
| 23 | AT3G25250 | AGC (cAMP-dependent, cGMP-dependent and protein kinase C) kinase family protein(AGC2-1) | 1.609285105 |
| 24 | AT4G08870 | Arginase/deacetylase superfamily protein(ARGAH2) | 1.588881613 |
| 25 | AT2G43550 | scorpion toxin-like knottin superfamily protein(AT2G43550) | 1.581428066 |
| 26 | AT5G56980 | cotton fiber protein(AT5G56980) | 1.577082944 |
| 27 | AT4G23190 | cysteine-rich RLK (RECEPTOR-like protein kinase) 11(CRK11) | 1.567084698 |
| 28 | AT3G55840 | Hs1pro-1 protein(AT3G55840) | 1.54956734 |
| 29 | AT5G41550 | Disease resistance protein (TIR-NBS-LRR class) family(AT5G41550) | 1.529377818 |
| 30 | AT1G73080 | PEP1 receptor 1(PEPR1) | 1.517718656 |
| 31 | AT2G02100 | low-molecular-weight cysteine-rich 69(LCR69) | 1.512401478 |
| 32 | AT4G20830 | FAD-binding Berberine family protein(AT4G20830) | 1.435850166 |
| 33 | AT4G29360 | O-Glycosyl hydrolases family 17 protein(AT4G29360) | 1.426031048 |
| 34 | AT1G09750 | Eukaryotic aspartyl protease family protein(AT1G09750) | 1.417364006 |
| 35 | AT1G58420 | Uncharacterized conserved protein UCP031279(AT1G58420) | 1.399432966 |
| 36 | AT1G01470 | Late embryogenesis abundant protein(LEA14) | 1.384960595 |
| 37 | AT2G44840 | ethylene-responsive element binding factor 13(ERF13) | 1.377284003 |
| 38 | AT1G61610 | S-locus lectin protein kinase family protein(AT1G61610) | 1.370090018 |
| 39 | AT3G14210 | GDSL-like lipase/acylhydrolase superfamily protein(ESM1) | 1.363723042 |
| 40 | AT3G25180 | cytochrome P450, family 82, subfamily G, polypeptide 1(CYP82G1) | 1.352952776 |
| 41 | AT4G23220 | cysteine-rich RECEPTOR-like kinase(CRK14) | 1.340443189 |
| 42 | AT5G06720 | peroxidase 2(PA2) | 1.332046625 |
| 43 | AT5G47550 | Cystatin/monellin superfamily protein(AT5G47550) | 1.331667579 |
| 44 | AT1G66090 | Disease resistance protein (TIR-NBS class)(AT1G66090) | 1.308044613 |
| 45 | AT5G24780 | vegetative storage protein 1(VSP1) | 1.304840086 |
| 46 | AT3G52450 | plant U-box 22(PUB22) | 1.304016674 |
| 47 | AT3G22275 | jasmonate ZIM-domain protein(AT3G22275) | 1.286220515 |
| 48 | AT1G55260 | Bifunctional inhibitor/lipid-transfer protein/seed storage 2S albumin superfamily protein(AT1G55260) | 1.277369258 |
| 49 | AT2G42260 | uv-b-insensitive 4(UVI4) | 1.249321424 |
| 50 | AT1G63860 | Disease resistance protein (TIR-NBS-LRR class) family(AT1G63860) | 1.213944687 |
| 51 | AT2G42530 | cold regulated 15b(COR15B) | 1.212835303 |
| 52 | AT2G38870 | Serine protease inhibitor, potato inhibitor I-type family protein(AT2G38870) | 1.211800994 |
| 53 | AT5G62470 | myb domain protein 96(MYB96) | 1.1984337 |
| 54 | AT1G73805 | Calmodulin binding protein-like protein(SARD1) | 1.189875207 |
| 55 | AT5G64900 | precursor of peptide 1(PROPEP1) | 1.182969004 |
| 56 | AT4G16970 | Protein kinase superfamily protein(AT4G16970) | 1.176609728 |
| 57 | AT1G27950 | glycosylphosphatidylinositol-anchored lipid protein transfer 1(LTPG1) | 1.175219761 |
| 58 | AT5G05300 | uncharacterized protein(AT5G05300) | 1.174038232 |
| 59 | AT1G51800 | Leucine-rich repeat protein kinase family protein(IOS1) | 1.158151229 |
| 60 | AT4G30650 | Low temperature and salt responsive protein family(AT4G30650) | 1.154661933 |
| 61 | AT3G15356 | Legume lectin family protein(AT3G15356) | 1.143493659 |
| 62 | AT4G00020 | BREAST CANCER 2 like 2A(BRCA2(IV)) | 1.130832067 |
| 63 | AT1G17380 | jasmonate-zim-domain protein 5(JAZ5) | 1.124394113 |
| 64 | AT1G29660 | GDSL-like Lipase/Acylhydrolase superfamily protein(AT1G29660) | 1.11287884 |
| 65 | AT5G45110 | NPR1-like protein 3(NPR3) | 1.111357561 |
| 66 | AT1G19180 | jasmonate-zim-domain protein 1(JAZ1) | 1.107414169 |
| 67 | AT3G50930 | cytochrome BC1 synthesi(BCS1) | 1.105332927 |
| 68 | AT2G03760 | sulfotransferase 12(SOT12) | 1.091474431 |
| 69 | AT2G01180 | phosphatidic acid phosphatase 1(PAP1) | 1.076138386 |
| 70 | AT4G31800 | WRKY DNA-binding protein 18(WRKY18) | 1.062294627 |
| 71 | AT5G11510 | myb domain protein 3r-4(MYB3R-4) | 1.050517287 |
| 72 | AT1G11000 | Seven transmembrane MLO family protein(MLO4) | 1.00948661 |

**Supplementary Table 3.** Xylooligosaccharide-profiling (ug/mg) in stem AIR through xylanase (GH11) digestion and quantified by high-performance anion-exchange chromatography with pulsed amperometric detection (HPAEC-PAD).

|  | xylose | xylobiose | xylotriose | xylotetrose | xylohexose |
| --- | --- | --- | --- | --- | --- |
| WT | 10.55 ± 0.91 | 0.21 ± 0.01 | 1.94 ± 0.18 | 4.66±0.24 | nd |
| 35S:AXE/XYL | **14.04 ± 1.1** | **0.25 ± 0.02** | **2.07 ± 0.07** | 4.82±0.13 | nd |

Data presented as mean ± standard deviation (SD) from 3 biological replicates. Highlighted values show significance at p ≤ 0.05 compared to the wild type. nd – not detected

**Supplementary Table 4.** Xylooligosaccharide -profiling (ug/ml) in alcohol soluble fraction and quantified by high-performance anion-exchange chromatography with pulsed amperometric detection (HPAEC-PAD).

|  | xylose | xylobiose | xylotriose | xylotetrose | xylohexose |
| --- | --- | --- | --- | --- | --- |
| WT | 0.04±0.01 | 0.02±0 | 3.63±0.29 | 0.57±0.09 | 0.44±0.06 |
| 35S:AXE/XYL | **0.06±0.01** | **0.04±0.01** | 2.93±0.62 | **0.97±0.07** | **0.85±0.1** |

Data presented as mean ± standard deviation (SD) from 3 biological replicates. Highlighted values show significance at p ≤ 0.05 compared to the wild type.

**Supplementary Table 5**. Primer used for Genotyping and RT-qPCR.

| **Oligo name** | **Gene ID** | **Name of gene** | **Sequence (5'-3')** |
| --- | --- | --- | --- |
| PCWL-33 (Forward) | AnAXE1 (An12 g05010) | Acetyl xylan esterase (AXE) | ATTTCGGTGATAACCCCACA |
| PCWL-34 (Reverse) | AnAXE1 (An12 g05010) | Acetyl xylan esterase (AXE)) | TTATCTCCCCAAATCGTCGT |
| PCWL-49 (Forward) | AN1818.2 | Xylanase (XYL) | CGTCGTCAACGAGATCTTCA |
| PCWL-50 (Reverse) | AN1818.2 | Xylanase (XYL) | CGTGTTAGCGAGAGAGGACA |
| PCWL 127 (Forward) | AT3G18780 | ACTIN | TGCTGGATTCTGGTGATGGT |
| PCWL 128 (Reverse) | AT3G18780 | ACTIN | AATTTCCCGCTCTGCTGTTG |
| PCWL-1005 (Forward) | AT2G14610 | PR1 | TGCTCTTGTTCTTCCCTCGA |
| PCWL-1006 (Reverse) | AT2G14610 | PR1 | CTAACCCACATGTTCACGGC |
| PCWL-1009 (Forward) | AT2G19190 | FRK1 | TGAGCTGGGAAGAGAGGTTG |
| PCWL-1010 (Reverse) | AT2G19190 | FRK1 | ACCGCTTCCTTCAACAGAGA |
| PCWL-247 (Forward) | AT1G21270 | WAK2 | ATTGCCGGACAACTCCATAG |
| PCWL-248 (Reverse) | AT1G21270 | WAK2 | GACGGTGCTCCCATGTAAGT |
| PCWL-432 (Forward) | AT5G49360 | BXL1 | CCACTGTTTGCATGTGATCC |
| PCWL-433 (Reverse) | AT5G49360 | BXL1 | CTCCAATACCGAGACGTGGT |
| PCWL-434 (Forward) | AT1G02640 | BXL2 | AAGCGGAGTTCAAGGACAGA |
| PCWL-435 (Reverse) | AT1G02640 | BXL2 | ATTGCGGTACCACCTTCTTG |
| PCWL-438 (Forward) | AT4G30270 | XTH24 | CAACGGCCAGCTTCTTACTC |
| PCWL-439 (Reverse) | AT4G30270 | XTH24 | TCATCCCAAGTGGATCCTTC |
| PCWL-462 (Forward) | AT4G23810 | WRKY53 | AAACTGTTGGGCAACGAAAC |
| PCWL-463 (Reverse) | AT4G23810 | WRKY53 | AATGGCTGGTTTGACTCTGG |
| PCWL-466 (Forward) | AT2G19190 | FRK1 | ACGGGCATAGTTCCACAAAG |
| PCWL-467 (Reverse) | AT2G19190 | FRK1 | CGTCAAAAGAACGACGATGA |
| PCWL-472 (Forward) | AT3G26830 | PAD3 | GGCTGAAGCGGTCATAAGAG |
| PCWL-473 (Reverse) | AT3G26830 | PAD3 | TCCAGGCTTAAGATGCTCGT |
| PCWL-474 (Forward) | AT2G38470 | WRKY33 | GAAACAAATGGTGGGAATGG |
| PCWL-475 (Reverse) | AT2G38470 | WRKY33 | TGTCGTGTGATGCTCTCTCC |
| PCWL-476 (Forward) | AT5G24110 | WRKY30 | GCTGGACGATGGATTCAGTT |
| PCWL-477 (Reverse) | AT5G24110 | WRKY30 | TTGCAGCTTGAGAGCAAGAA |
| PCWL-478 (Forward) | AT1G80840 | WRKY40 | GATCCACCGACAAGTGCTTT |
| PCWL-479 (Reverse) | AT1G80840 | WRKY40 | AGGGCTGATTTGATCCCTCT |
| PCWL-788 (Forward) | AT4G23310 | CRK23 | ACCACCGCCAACTTCAATTC |
| PCWL-789 (Reverse) | AT4G23310 | CRK23 | AGCAGAAGAAGGGCAGTGAT |
| PCWL-796 (Forward) | AT4G37780 | MYB87 | AAAGAGGTGCGGGAAGAGTT |
| PCWL-797 (Reverse) | AT4G37780 | MYB87 | GCTTCTTCTTCAGCCTCGTG |
| PCWL-800 (Forward) | AT4G01250 | WRKY22 | CATGGCGAAAGTACGGACAG |
| PCWL-801 (Reverse) | AT4G01250 | WRKY22 | GAATTACGGTGTGTCGGAGC |
| PCWL-802 (Forward) | AT5G40350 | MYB24 | GTGAGAAAAGGGCCATGGAC |
| PCWL-803 (Reverse) | AT5G40350 | MYB24 | GTGATATTTCCCCGTCGCAC |
| PCWL-804 (Forward) | AT5G16190 | CSLA11 | AGCAACATCGATGGTCATGC |
| PCWL-805 (Reverse) | AT5G16190 | CSLA11 | TCGGAATGTTGACTTCGGGA |
| PCWL-806 (Forward) | AT4G30280 | XTH18 | CCCAACGAAGCAACCAATGA |
| PCWL-807 (Reverse) | AT4G30280 | XTH18 | GGCCGTTTGAATCGAGTTGT |
| PCWL-876 (Forward) | AT4G37780 | MYB87 | GCATCCCCATCATTGAACTCC |
| PCWL-877 (Reverse) | AT4G37780 | MYB87 | GATCTCGGTTCCGTCAAAGC |
| PCWL-878 (Forward) | AT5G40350 | MYB24 | GCGACGGGGAAATATCACAC |
| PCWL-879 (Reverse) | AT5G40350 | MYB24 | CGTTTCTCCGCTCTTGATGA |
| PCWL-882 (Forward) | AT1G02640 | BXL2 | AGCGGAGTTCAAGGACAGAA |
| PCWL-883 (Reverse) | AT1G02640 | BXL2 | GATACCCGGCCCAAACAATC |

**Supplementary Table 6.** Antibodies Used for Glycome Profiling.

| **Information** | **Type** | **Cat #** | **Company** | **Organism** |
| --- | --- | --- | --- | --- |
| LM10 (Heteroxylan) | Pimary | AS18 4206-1ml | Agrisera | Rat |
| LM11 (arabinixylan and xylan) | Pimary | AS18 4207-1ml | Agrisera | Rat |
| LM15 (Xyloglucan) | Pimary | AS18 4203-1ML | Agrisera | Rat |
| LM28 (Glucuronoxylan) | Pimary | AS18 4208-1ml | Agrisera | Rat |
| CCRC-M7 (Rhamnogalacturonan-I / Arabinogalactan) | Pimary | AS16 3225-1ml | Agrisera | Mouse |
