# Supplementary material
Source: Research Square preprint supplement (doi:10.21203/rs.3.rs-9277431/v1)
Supplement: Supplementary file 2 [file 673a311b7b7df06605dee097.xlsx]

## Sheet: WP AXE XYL RNAseq_Upregulated
ID	seqnames	start	end	strand	gene_name	Description	WT1	WT3	WT4	AFC2	AFC3	AFC4	baseMean	FoldChange	log2FoldChange	stat	pvalue	padj	dispGeneEst	dispFit	dispMAP	dispersion	betaConv	maxCooks	GO...Biological.Process	GO...Cellular.Component	GO...Molecular.Function	KEGG.Pathway.Info
AT4G35240.2	4	16760960	16767087	-	AT4G35240	DNA-directed RNA polymerase subunit beta putative (DUF630 and DUF632)	0	0	0	2	350	194	55.05	402.581	8.653	3.372	0.000745813	0.0175486	3.7423	0.1746	1.2304	3.7423	TRUE	6.9305	GO:0071310 [Name: cellular response to organic substance]	GO:0005634 [Name: nucleus]	GO:0003899 [Name: DNA-directed 5'-3' RNA polymerase activity]	-
AT4G23050.2	4	12080060	12084256	+	AT4G23050	PAS domain-containing protein tyrosine kinase family protein	0	0	0	26	147	83	26.55	194.337	7.602	5.429	5.68282e-08	6.61289e-06	0.4818	0.3526	0.4069	0.4069	TRUE	2.4	GO:0018298 [Name: protein-chromophore linkage]; GO:0006355 [Name: regulation of transcription DNA-templated]; GO:0050896 [Name: response to stimulus]; GO:0007165 [Name: signal transduction]	GO:0005737 [Name: cytoplasm]	GO:0005524 [Name: ATP binding]; GO:0004674 [Name: protein serine/threonine kinase activity]; GO:0009881 [Name: photoreceptor activity]; GO:0004672 [Name: protein kinase activity]; GO:0004712 [Name: protein serine/threonine/tyrosine kinase activity]	-
AT2G40540.2	2	16931351	16934570	+	POT2	potassium transporter 2	0	0	0	52	120	71	26.08	190.729	7.575	5.895	3.75199e-09	5.91908e-07	0.0331	0.3589	0.1835	0.1835	TRUE	0.1564	GO:0006813 [Name: potassium ion transport]	GO:0016020 [Name: membrane]; GO:0016021 [Name: integral component of membrane]; GO:0005886 [Name: plasma membrane]	GO:0015079 [Name: potassium ion transmembrane transporter activity]	-
AT3G60240.2	3	22261724	22268445	+	EIF4G	eukaryotic translation initiation factor 4G	0	0	0	120	51	36	24.4	178.098	7.477	5.194	2.0627e-07	2.11728e-05	0.6311	0.3829	0.4864	0.4864	TRUE	1.4238	GO:0009615 [Name: response to virus]	GO:0005576 [Name: extracellular region]; GO:0005737 [Name: cytoplasm]	GO:0003743 [Name: translation initiation factor activity]	ath03013 [Pathway Title: RNA transport]
AT4G13020.2	4	7603826	7607155	+	MHK	Protein kinase superfamily protein	0	0	0	63	10	52	16.36	119.354	6.899	4.206	2.59573e-05	0.00119873	1.4826	0.5668	0.9281	0.9281	TRUE	5.2186	GO:0035556 [Name: intracellular signal transduction]	GO:0005737 [Name: cytoplasm]; GO:0005634 [Name: nucleus]	GO:0004712 [Name: protein serine/threonine/tyrosine kinase activity]; GO:0004693 [Name: cyclin-dependent protein serine/threonine kinase activity]; GO:0004674 [Name: protein serine/threonine kinase activity]; GO:0005524 [Name: ATP binding]	-
AT3G11560.4	3	3639435	3646025	+	AT3G11560	LETM1-like protein	0	0	0	45	12	55	14.65	106.688	6.737	4.172	3.0148e-05	0.0013524	1.2078	0.6321	0.8672	0.8672	TRUE	0.1493	GO:0016070 [Name: RNA metabolic process]; GO:0046700 [Name: heterocycle catabolic process]; GO:1901361 [Name: organic cyclic compound catabolic process]; GO:0010228 [Name: vegetative to reproductive phase transition of meristem]; GO:0051171 [Name: regulation of nitrogen compound metabolic process]; GO:0019439 [Name: aromatic compound catabolic process]; GO:0019752 [Name: carboxylic acid metabolic…	GO:0009507 [Name: chloroplast]; GO:0016021 [Name: integral component of membrane]; GO:0009941 [Name: chloroplast envelope]; GO:0005829 [Name: cytosol]; GO:0005743 [Name: mitochondrial inner membrane]	GO:0003674 [Name: molecular_function]	-
AT1G71240.1	1	26855430	26859741	+	AT1G71240	chromosome-partitioning protein putative (DUF639)	0	0	0	12	64	49	13.52	98.811	6.627	4.366	1.26378e-05	0.000663089	0.5991	0.6843	0.6471	0.6471	TRUE	0.0807	GO:0009414 [Name: response to water deprivation]; GO:0090693 [Name: plant organ senescence]	GO:0016021 [Name: integral component of membrane]	GO:0003674 [Name: molecular_function]	-
AT4G21200.1	4	11302685	11306601	+	GA2OX8	gibberellin 2-oxidase 8	0	0	0	46	52	20	12.76	93.536	6.547	4.669	3.02918e-06	0.000205792	0.0967	0.7245	0.4037	0.4037	TRUE	0.1181	GO:0009685 [Name: gibberellin metabolic process]; GO:0009686 [Name: gibberellin biosynthetic process]	GO:0005737 [Name: cytoplasm]	GO:0052635 [Name: C-20 gibberellin 2-beta-dioxygenase activity]; GO:0051213 [Name: dioxygenase activity]; GO:0046872 [Name: metal ion binding]	ath00904 [Pathway Title: Diterpenoid biosynthesis]
AT5G19090.3	5	6387489	6390024	+	AT5G19090	Heavy metal transport/detoxification superfamily protein	0	0	0	27	46	35	12.03	87.866	6.457	4.669	3.02475e-06	0.000205792	0	0.7676	0.3639	0.3639	TRUE	0.3475	GO:0048507 [Name: meristem development]; GO:0009944 [Name: polarity specification of adaxial/abaxial axis]; GO:0009908 [Name: flower development]; GO:0009790 [Name: embryo development]; GO:0007049 [Name: cell cycle]	GO:0009506 [Name: plasmodesma]	GO:0046872 [Name: metal ion binding]	-
AT1G11720.1	1	3951553	3957044	+	SS3	starch synthase 3	0	0	0	30	21	43	11.67	84.91	6.408	4.223	2.41412e-05	0.0011304	0.4749	0.791	0.6446	0.6446	TRUE	0.0677	GO:0010021 [Name: amylopectin biosynthetic process]; GO:0019252 [Name: starch biosynthetic process]	GO:0009507 [Name: chloroplast]; GO:0009501 [Name: amyloplast]	GO:2001070 [Name: starch binding]; GO:0009011 [Name: starch synthase activity]; GO:0033201 [Name: alpha-14-glucan synthase activity]; GO:0004373 [Name: glycogen (starch) synthase activity]; GO:0042802 [Name: identical protein binding]	-
AT2G02170.2	2	556493	558715	-	AT2G02170	Remorin family protein	0	0	0	17	31	45	11.07	80.678	6.334	4.17	3.04216e-05	0.00135949	0.4322	0.8337	0.6468	0.6468	TRUE	2.7995	GO:0010033 [Name: response to organic substance]; GO:1901700 [Name: response to oxygen-containing compound]; GO:0006950 [Name: response to stress]	GO:0005886 [Name: plasma membrane]	GO:0003674 [Name: molecular_function]	-
AT2G14610.1	2	6241704	6242463	-	PR1	pathogenesis-related protein 1	0	0	1	25	241	0	21.82	79.692	6.316	3.15	0.00163466	0.0318875	5.3245	0.4273	2.0308	2.0308	TRUE	0.5829	GO:0006952 [Name: defense response]; GO:0009627 [Name: systemic acquired resistance]; GO:0009414 [Name: response to water deprivation]; GO:0010266 [Name: response to vitamin B1]	GO:0099503 [Name: secretory vesicle]; GO:0048046 [Name: apoplast]; GO:0005615 [Name: extracellular space]; GO:0005576 [Name: extracellular region]	GO:0003674 [Name: molecular_function]	ath04075 [Pathway Title: Plant hormone signal transduction]; ath04626 [Pathway Title: Plant-pathogen interaction]
AT3G09560.3	3	2934617	2939456	-	PAH1	Lipin family protein	0	0	0	23	45	24	9.84	71.981	6.17	4.389	1.13697e-05	0.000613249	0	0.9367	0.4062	0.4062	TRUE	0.1258	GO:0044255 [Name: cellular lipid metabolic process]; GO:0006629 [Name: lipid metabolic process]; GO:0006886 [Name: intracellular protein transport]; GO:0008654 [Name: phospholipid biosynthetic process]; GO:0016036 [Name: cellular response to phosphate starvation]; GO:0019375 [Name: galactolipid biosynthetic process]	GO:0000139 [Name: Golgi membrane]; GO:0032586 [Name: protein storage vacuole membrane]; GO:0005829 [Name: cytosol]	GO:0008195 [Name: phosphatidate phosphatase activity]	ath00561 [Pathway Title: Glycerolipid metabolism]; ath01100 [Pathway Title: Metabolic pathways]; ath01110 [Pathway Title: Biosynthesis of secondary metabolites]; ath00564 [Pathway Title: Glycerophospholipid metabolism]
AT3G26510.4	3	9711140	9712659	-	AT3G26510	Octicosapeptide/Phox/Bem1p family protein	0	0	0	21	50	17	8.97	65.976	6.044	4.176	2.96943e-05	0.00134488	0	1.0268	0.4904	0.4904	TRUE	0.4431	GO:0055062 [Name: phosphate ion homeostasis]; GO:0009611 [Name: response to wounding]; GO:0019538 [Name: protein metabolic process]; GO:0019684 [Name: photosynthesis light reaction]; GO:0043170 [Name: macromolecule metabolic process]; GO:0009891 [Name: positive regulation of biosynthetic process]; GO:0031326 [Name: regulation of cellular biosynthetic process]; GO:0033993 [Name: response to lipid]…	GO:0005634 [Name: nucleus]	GO:0005515 [Name: protein binding]	-
AT5G36890.2	5	14541350	14546229	-	BGLU42	beta glucosidase 42	0	0	0	31	43	11	8.83	64.778	6.017	3.997	6.40817e-05	0.00248383	0.163	1.043	0.6136	0.6136	TRUE	0.2	GO:1990641 [Name: response to iron ion starvation]; GO:0009617 [Name: response to bacterium]; GO:0031349 [Name: positive regulation of defense response]; GO:0030245 [Name: cellulose catabolic process]; GO:0009866 [Name: induced systemic resistance ethylene mediated signaling pathway]; GO:0019748 [Name: secondary metabolic process]	GO:0005829 [Name: cytosol]	GO:0008422 [Name: beta-glucosidase activity]; GO:0102483 [Name: scopolin beta-glucosidase activity]	ath00940 [Pathway Title: Phenylpropanoid biosynthesis]; ath01110 [Pathway Title: Biosynthesis of secondary metabolites]; ath00460 [Pathway Title: Cyanoamino acid metabolism]; ath00500 [Pathway Title: Starch and sucrose metabolism]; ath01100 [Pathway Title: Metabolic pathways]
AT5G23080.2	5	7742940	7748933	-	TGH	SWAP (Suppressor-of-White-APricot)/surp domain-containing protein	0	0	0	23	19	31	8.88	64.613	6.014	3.911	9.18157e-05	0.00334608	0.3136	1.0366	0.6841	0.6841	TRUE	0.0766	GO:0010087 [Name: phloem or xylem histogenesis]; GO:0006396 [Name: RNA processing]; GO:0040008 [Name: regulation of growth]; GO:0006397 [Name: mRNA processing]; GO:0035196 [Name: production of miRNAs involved in gene silencing by miRNA]; GO:0030422 [Name: production of siRNA involved in RNA interference]	GO:0016607 [Name: nuclear speck]; GO:0005634 [Name: nucleus]	GO:0003723 [Name: RNA binding]; GO:0070883 [Name: pre-miRNA binding]; GO:0070878 [Name: primary miRNA binding]	-
AT5G42520.2	5	17000259	17002607	+	BPC6	basic pentacysteine 6	0	0	0	55	7	8	8.73	63.743	5.994	3.218	0.00129068	0.0265199	2.0364	1.0552	1.4805	1.4805	TRUE	2.4305	GO:0006355 [Name: regulation of transcription DNA-templated]; GO:0009723 [Name: response to ethylene]	GO:0005730 [Name: nucleolus]; GO:0005634 [Name: nucleus]	GO:0043565 [Name: sequence-specific DNA binding]; GO:0000976 [Name: transcription regulatory region sequence-specific DNA binding]; GO:0003700 [Name: transcription factor activity sequence-specific DNA binding]; GO:0042803 [Name: protein homodimerization activity]	-
AT3G55450.2	3	20558102	20560096	+	PBL1	PBS1-like 1	0	0	0	22	24	28	8.71	63.446	5.987	4.015	5.94428e-05	0.00234896	0.1356	1.0575	0.5826	0.5826	TRUE	0.0995	GO:0002237 [Name: response to molecule of bacterial origin]; GO:0006468 [Name: protein phosphorylation]; GO:1900424 [Name: regulation of defense response to bacterium]	GO:0016021 [Name: integral component of membrane]; GO:0005829 [Name: cytosol]	GO:0005524 [Name: ATP binding]; GO:0004674 [Name: protein serine/threonine kinase activity]	-
AT1G35580.1	1	13122204	13125264	-	CINV1	cytosolic invertase 1	0	0	0	14	29	31	8.5	61.954	5.953	3.897	9.74289e-05	0.00351252	0.2256	1.0833	0.6613	0.6613	TRUE	1.1637	GO:0005987 [Name: sucrose catabolic process]; GO:0034214 [Name: protein hexamerization]; GO:0048364 [Name: root development]; GO:0006520 [Name: cellular amino acid metabolic process]; GO:0042542 [Name: response to hydrogen peroxide]; GO:0005975 [Name: carbohydrate metabolic process]	GO:0009507 [Name: chloroplast]; GO:0005829 [Name: cytosol]; GO:0016020 [Name: membrane]; GO:0005634 [Name: nucleus]	GO:0004575 [Name: sucrose alpha-glucosidase activity]; GO:0033926 [Name: glycopeptide alpha-N-acetylgalactosaminidase activity]; GO:0004564 [Name: beta-fructofuranosidase activity]	-
AT4G08390.2	4	5314905	5317432	+	APXS	stromal ascorbate peroxidase	0	0	0	20	36	21	8.35	61.087	5.933	4.11	3.95666e-05	0.00169361	0	1.1027	0.4809	0.4809	TRUE	0.1257	GO:0042744 [Name: hydrogen peroxide catabolic process]; GO:0000302 [Name: response to reactive oxygen species]; GO:0034599 [Name: cellular response to oxidative stress]	GO:0005829 [Name: cytosol]; GO:0009507 [Name: chloroplast]; GO:0005739 [Name: mitochondrion]; GO:0009570 [Name: chloroplast stroma]	GO:0046872 [Name: metal ion binding]; GO:0020037 [Name: heme binding]; GO:0016688 [Name: L-ascorbate peroxidase activity]; GO:0004601 [Name: peroxidase activity]	ath00053 [Pathway Title: Ascorbate and aldarate metabolism]; ath00480 [Pathway Title: Glutathione metabolism]
AT3G41761.1	3	14195917	14196078	+	AT3G41761		0	0	0	17	48	14	7.95	58.588	5.873	3.891	9.99206e-05	0.00359134	0.1188	1.1572	0.6202	0.6202	TRUE	1.0549	-	-	-	-
AT4G12790.5	4	7517055	7519362	-	AT4G12790	P-loop containing nucleoside triphosphate hydrolases superfamily protein	0	0	0	27	30	11	7.34	53.824	5.75	3.753	0.000174872	0.00549539	0.0945	1.2526	0.6683	0.6683	TRUE	0.1103	GO:0009611 [Name: response to wounding]; GO:0014070 [Name: response to organic cyclic compound]; GO:0098542 [Name: defense response to other organism]; GO:0009867 [Name: jasmonic acid mediated signaling pathway]; GO:0018130 [Name: heterocycle biosynthetic process]; GO:0031347 [Name: regulation of defense response]; GO:0010035 [Name: response to inorganic substance]	GO:0005634 [Name: nucleus]	GO:0005525 [Name: GTP binding]; GO:0003924 [Name: GTPase activity]; GO:0016787 [Name: hydrolase activity]	-
AT1G63660.2	1	23603939	23607275	-	AT1G63660	GMP synthase (glutamine-hydrolyzing) putative / glutamine amidotransferase	0	0	0	32	29	7	7.31	53.524	5.742	3.523	0.000426357	0.011248	0.4637	1.2582	0.8905	0.8905	TRUE	0.0913	GO:0006541 [Name: glutamine metabolic process]	GO:0005737 [Name: cytoplasm]; GO:0005829 [Name: cytosol]	GO:0005524 [Name: ATP binding]; GO:0016740 [Name: transferase activity]; GO:0016462 [Name: pyrophosphatase activity]; GO:0003922 [Name: GMP synthase (glutamine-hydrolyzing) activity]	ath00230 [Pathway Title: Purine metabolism]; ath01100 [Pathway Title: Metabolic pathways]
AT2G26510.2	2	11273911	11277630	+	NAT3	Xanthine/uracil permease family protein	0	0	0	10	37	22	7.29	53.358	5.738	3.68	0.000233285	0.00696771	0.1739	1.2618	0.7281	0.7281	TRUE	0.7044	GO:0098702 [Name: adenine import across plasma membrane]; GO:0035344 [Name: hypoxanthine transport]; GO:0098710 [Name: guanine import across plasma membrane]; GO:0098721 [Name: uracil import across plasma membrane]	GO:0016021 [Name: integral component of membrane]	GO:0022857 [Name: transmembrane transporter activity]	-
AT5G08190.2	5	2635902	2637433	+	NF-YB12	nuclear factor Y subunit B12	0	0	0	15	46	11	7.03	51.827	5.696	3.656	0.000256545	0.00748181	0.1618	1.3079	0.7248	0.7248	TRUE	1.3012	GO:0006355 [Name: regulation of transcription DNA-templated]	GO:0005634 [Name: nucleus]	GO:0046982 [Name: protein heterodimerization activity]	-
AT3G02885.1	3	638021	639055	-	GASA5	GAST1 protein homolog 5	0	0	1	36	46	37	13.68	51.04	5.674	4.451	8.53693e-06	0.000491836	0	0.6764	0.2837	0.2837	TRUE	0.2902	GO:0009408 [Name: response to heat]; GO:0010286 [Name: heat acclimation]; GO:0009751 [Name: response to salicylic acid]; GO:0009740 [Name: gibberellic acid mediated signaling pathway]	GO:0009506 [Name: plasmodesma]; GO:0005576 [Name: extracellular region]	-	-
AT4G14960.1	4	8548492	8550430	-	TUBA6	Tubulin/FtsZ family protein	0	0	0	21	9	19	6.13	44.59	5.479	3.223	0.00126865	0.0262278	0.5655	1.4988	1.0539	1.0539	TRUE	2.203	GO:0007017 [Name: microtubule-based process]	GO:0005874 [Name: microtubule]	GO:0005200 [Name: structural constituent of cytoskeleton]; GO:0005525 [Name: GTP binding]; GO:0003924 [Name: GTPase activity]	ath04145 [Pathway Title: Phagosome]
AT1G54020.3	1	20161670	20163748	-	AT1G54020	GDSL-like Lipase/Acylhydrolase superfamily protein	0	0	0	15	26	15	6.08	44.486	5.475	3.57	0.000357342	0.00977844	0	1.5114	0.6668	0.6668	TRUE	0.1257	GO:0016042 [Name: lipid catabolic process]	GO:0005829 [Name: cytosol]; GO:0000325 [Name: plant-type vacuole]; GO:0005576 [Name: extracellular region]; GO:0005773 [Name: vacuole]	GO:0016788 [Name: hydrolase activity acting on ester bonds]	-
AT3G55610.2	3	20624970	20629093	-	P5CSB	delta 1-pyrroline-5-carboxylate synthase 2	0	0	0	6	28	21	5.95	43.483	5.442	3.224	0.00126579	0.0261916	0.4348	1.5442	1.0249	1.0249	TRUE	0.0839	GO:0055129 [Name: L-proline biosynthetic process]	GO:0005737 [Name: cytoplasm]	GO:0004350 [Name: glutamate-5-semialdehyde dehydrogenase activity]; GO:0005524 [Name: ATP binding]; GO:0004349 [Name: glutamate 5-kinase activity]	ath01230 [Pathway Title: Biosynthesis of amino acids]; ath01100 [Pathway Title: Metabolic pathways]; ath01110 [Pathway Title: Biosynthesis of secondary metabolites]; ath00330 [Pathway Title: Arginine and proline metabolism]
AT3G43920.2	3	15753548	15760830	+	DCL3	dicer-like 3	0	0	0	23	15	12	5.82	42.368	5.405	3.318	0.000905832	0.0202979	0.2055	1.5788	0.8821	0.8821	TRUE	0.1434	GO:0051214 [Name: RNA virus induced gene silencing]; GO:0010216 [Name: maintenance of DNA methylation]; GO:0030422 [Name: production of siRNA involved in RNA interference]; GO:0051607 [Name: defense response to virus]; GO:0010267 [Name: production of ta-siRNAs involved in RNA interference]	GO:0005634 [Name: nucleus]; GO:0005730 [Name: nucleolus]; GO:0005737 [Name: cytoplasm]	GO:0003723 [Name: RNA binding]; GO:0003725 [Name: double-stranded RNA binding]; GO:0046872 [Name: metal ion binding]; GO:0004386 [Name: helicase activity]; GO:0005524 [Name: ATP binding]; GO:0004525 [Name: ribonuclease III activity]	-
AT4G25450.3	4	13009733	13013968	-	ABCB28	non-intrinsic ABC protein 8	0	0	0	11	39	9	5.68	41.796	5.385	3.286	0.00101743	0.0221623	0.2082	1.6174	0.9056	0.9056	TRUE	1.5204	GO:0055085 [Name: transmembrane transport]	GO:0016021 [Name: integral component of membrane]	GO:0005524 [Name: ATP binding]	-
AT5G13170.1	5	4181042	4183306	-	SWEET15	senescence-associated gene 29	1	0	0	40	67	4	10.94	41.619	5.379	3.426	0.000612414	0.0150579	0	0.8438	0.8791	0.8791	TRUE	3.2368	GO:0008643 [Name: carbohydrate transport]; GO:0010150 [Name: leaf senescence]; GO:0009793 [Name: embryo development ending in seed dormancy]; GO:0071215 [Name: cellular response to abscisic acid stimulus]; GO:0071470 [Name: cellular response to osmotic stress]; GO:0071446 [Name: cellular response to salicylic acid stimulus]; GO:0010431 [Name: seed maturation]; GO:0015770 [Name: sucrose transport]	GO:0005886 [Name: plasma membrane]; GO:0016021 [Name: integral component of membrane]; GO:0000139 [Name: Golgi membrane]; GO:0005887 [Name: integral component of plasma membrane]	GO:0051119 [Name: sugar transmembrane transporter activity]; GO:0008515 [Name: sucrose transmembrane transporter activity]	-
AT4G27480.2	4	13736835	13738975	-	AT4G27480	Core-2/I-branching beta-16-N-acetylglucosaminyltransferase family protein	0	0	0	18	23	11	5.65	41.342	5.37	3.417	0.000633548	0.0154644	0	1.6254	0.749	0.749	TRUE	0.1684	GO:0009737 [Name: response to abscisic acid]; GO:0007165 [Name: signal transduction]; GO:0071695 [Name: anatomical structure maturation]	GO:0016021 [Name: integral component of membrane]	GO:0015020 [Name: glucuronosyltransferase activity]	-
AT2G43190.3	2	17955989	17958041	+	AT2G43190	ribonuclease P family protein	0	0	0	12	33	10	5.5	40.507	5.34	3.326	0.000881889	0.0198751	0	1.6681	0.8267	0.8267	TRUE	0.6457	GO:0006364 [Name: rRNA processing]; GO:0001682 [Name: tRNA 5'-leader removal]	GO:0005634 [Name: nucleus]; GO:0000172 [Name: ribonuclease MRP complex]; GO:0030677 [Name: ribonuclease P complex]	GO:0033204 [Name: ribonuclease P RNA binding]	ath03008 [Pathway Title: Ribosome biogenesis in eukaryotes]; ath03013 [Pathway Title: RNA transport]
AT4G20980.4	4	11216881	11219638	+	TIF3D1	Eukaryotic translation initiation factor 3 subunit 7 (eIF-3)	0	0	0	9	17	21	5.49	40.009	5.322	3.183	0.0014594	0.0291954	0.2778	1.671	0.9836	0.9836	TRUE	1.3822	GO:0002191 [Name: cap-dependent translational initiation]; GO:0006413 [Name: translational initiation]; GO:0001732 [Name: formation of cytoplasmic translation initiation complex]	GO:0016282 [Name: eukaryotic 43S preinitiation complex]; GO:0033290 [Name: eukaryotic 48S preinitiation complex]; GO:0005829 [Name: cytosol]; GO:0005852 [Name: eukaryotic translation initiation factor 3 complex]	GO:0003729 [Name: mRNA binding]; GO:0003743 [Name: translation initiation factor activity]; GO:0098808 [Name: mRNA cap binding]	ath03013 [Pathway Title: RNA transport]
AT5G09672.1	5	2995910	2998932	-	CPuORF21		2	0	1	63	190	1	23.05	39.301	5.296	3.496	0.000473011	0.0122586	1.7241	0.4048	1.1284	1.1284	TRUE	0.0635	-	-	-	-
AT5G06960.2	5	2154822	2157646	+	TGA5	OCS-element binding factor 5	0	0	0	9	35	7	4.83	35.628	5.155	2.996	0.00273852	0.0472279	0.2947	1.8988	1.0983	1.0983	TRUE	1.8599	GO:0009410 [Name: response to xenobiotic stimulus]; GO:0009863 [Name: salicylic acid mediated signaling pathway]; GO:0006351 [Name: transcription DNA-templated]; GO:0098542 [Name: defense response to other organism]	GO:0005634 [Name: nucleus]	GO:0000976 [Name: transcription regulatory region sequence-specific DNA binding]; GO:0003700 [Name: transcription factor activity sequence-specific DNA binding]; GO:0042802 [Name: identical protein binding]; GO:0003677 [Name: DNA binding]	ath04075 [Pathway Title: Plant hormone signal transduction]
AT1G67700.3	1	25374222	25376019	+	HHL1	multidrug resistance protein	0	0	0	17	19	7	4.64	34.062	5.09	3.024	0.00249338	0.043968	0	1.9752	1.0042	1.0042	TRUE	0.1192	GO:0009059 [Name: macromolecule biosynthetic process]; GO:0008610 [Name: lipid biosynthetic process]; GO:0015994 [Name: chlorophyll metabolic process]; GO:0044271 [Name: cellular nitrogen compound biosynthetic process]; GO:0009416 [Name: response to light stimulus]; GO:0044283 [Name: small molecule biosynthetic process]	GO:0009507 [Name: chloroplast]; GO:0009534 [Name: chloroplast thylakoid]; GO:0016021 [Name: integral component of membrane]; GO:0005739 [Name: mitochondrion]; GO:0009941 [Name: chloroplast envelope]; GO:0009535 [Name: chloroplast thylakoid membrane]	GO:0003729 [Name: mRNA binding]	-
AT5G58600.2	5	23683791	23685715	-	PMR5	Pmr5/Cas1p GDSL/SGNH-like acyl-esterase family protein (DUF828)	0	0	0	15	15	10	4.51	32.95	5.042	3.025	0.00248354	0.0438274	0	2.0327	0.9633	0.9633	TRUE	0.1351	GO:0006952 [Name: defense response]; GO:0009620 [Name: response to fungus]	GO:0016021 [Name: integral component of membrane]; GO:0005794 [Name: Golgi apparatus]; GO:0005783 [Name: endoplasmic reticulum]	GO:0016413 [Name: O-acetyltransferase activity]	-
AT5G57270.3	5	23200614	23203467	-	AT5G57270	Core-2/I-branching beta-16-N-acetylglucosaminyltransferase family protein	0	0	1	28	22	24	8.89	32.631	5.028	3.633	0.000279947	0.00804454	0	1.0356	0.4939	0.4939	TRUE	1.0622	-	GO:0016021 [Name: integral component of membrane]	GO:0016757 [Name: transferase activity transferring glycosyl groups]	-
AT3G07610.3	3	2426069	2432913	+	JMJ25	Transcription factor jumonji (jmjC) domain-containing protein	1	0	0	11	24	28	7.43	27.801	4.797	3.264	0.00109723	0.0235109	0	1.2376	0.6546	0.6546	TRUE	1.0544	GO:0009908 [Name: flower development]; GO:0070919 [Name: production of siRNA involved in chromatin silencing by small RNA]; GO:0048366 [Name: leaf development]; GO:0010468 [Name: regulation of gene expression]; GO:0080188 [Name: RNA-directed DNA methylation]; GO:0033169 [Name: histone H3-K9 demethylation]; GO:0009555 [Name: pollen development]; GO:0032776 [Name: DNA methylation on cytosine]	GO:0005634 [Name: nucleus]	GO:0032454 [Name: histone demethylase activity (H3-K9 specific)]; GO:0031490 [Name: chromatin DNA binding]	-
AT5G65210.5	5	26057814	26061104	+	TGA1	bZIP transcription factor family protein	0	0	1	18	56	4	7.3	26.77	4.743	2.978	0.00289771	0.0485831	0	1.26	0.9408	0.9408	TRUE	0.0832	GO:0006351 [Name: transcription DNA-templated]; GO:0042742 [Name: defense response to bacterium]	GO:0005634 [Name: nucleus]	GO:0003700 [Name: transcription factor activity sequence-specific DNA binding]; GO:0000976 [Name: transcription regulatory region sequence-specific DNA binding]; GO:0043565 [Name: sequence-specific DNA binding]	ath04075 [Pathway Title: Plant hormone signal transduction]
AT1G52040.1	1	19350375	19352782	-	MBP1	myrosinase-binding protein 1	11	1	8	143	921	56	99.94	26.201	4.712	5.685	1.30663e-08	1.90768e-06	0.6162	0.1001	0.3858	0.3858	TRUE	0.697	GO:0006952 [Name: defense response]	GO:0000325 [Name: plant-type vacuole]; GO:0005634 [Name: nucleus]	GO:0030246 [Name: carbohydrate binding]	-
AT1G07985.1	1	2475405	2476155	+	AT1G07985	uncharacterized protein	3	0	1	53	129	14	19.27	25.017	4.645	4.198	2.6928e-05	0.00123386	0.4449	0.4826	0.4606	0.4606	TRUE	0.103	GO:0043666 [Name: regulation of phosphoprotein phosphatase activity]	GO:0005886 [Name: plasma membrane]; GO:0005811 [Name: lipid particle]; GO:0005739 [Name: mitochondrion]	GO:0019903 [Name: protein phosphatase binding]	-
AT4G37990.1	4	17855876	17857639	+	CAD8	cinnamyl alcohol dehydrogenase 8	1	0	1	15	104	4	10.71	24.729	4.628	3.123	0.00179022	0.0340736	0.9761	0.8615	0.9348	0.9348	TRUE	0.5708	GO:0009809 [Name: lignin biosynthetic process]; GO:0009617 [Name: response to bacterium]	GO:0005886 [Name: plasma membrane]	GO:0008270 [Name: zinc ion binding]; GO:0016491 [Name: oxidoreductase activity]; GO:0045551 [Name: cinnamyl-alcohol dehydrogenase activity]; GO:0016616 [Name: oxidoreductase activity acting on the CH-OH group of donors NAD or NADP as acceptor]; GO:0052747 [Name: sinapyl alcohol dehydrogenase activity]; GO:0047681 [Name: aryl-alcohol dehydrogenase (NADP+) activity]	ath00940 [Pathway Title: Phenylpropanoid biosynthesis]; ath01110 [Pathway Title: Biosynthesis of secondary metabolites]; ath01100 [Pathway Title: Metabolic pathways]
AT3G60160.1	3	22223803	22229204	-	ABCC9	multidrug resistance-associated protein 9	0	0	3	42	109	6	14.96	24.051	4.588	3.293	0.000992276	0.0217579	1.2092	0.619	0.8912	0.8912	TRUE	0.2351	GO:0009624 [Name: response to nematode]; GO:0055085 [Name: transmembrane transport]	GO:0009506 [Name: plasmodesma]; GO:0016020 [Name: membrane]; GO:0016021 [Name: integral component of membrane]	GO:0005524 [Name: ATP binding]; GO:0042626 [Name: ATPase activity coupled to transmembrane movement of substances]; GO:0008559 [Name: xenobiotic-transporting ATPase activity]	-
AT4G23600.1	4	12310619	12313212	+	CORI3	Tyrosine transaminase family protein	18	0	4	192	619	54	82.52	21.926	4.455	5.168	2.36774e-07	2.39897e-05	0.794	0.1194	0.423	0.423	TRUE	0.1786	GO:0009058 [Name: biosynthetic process]; GO:0009753 [Name: response to jasmonic acid]; GO:0009611 [Name: response to wounding]; GO:0006520 [Name: cellular amino acid metabolic process]; GO:0042538 [Name: hyperosmotic salinity response]; GO:0009737 [Name: response to abscisic acid]; GO:0010188 [Name: response to microbial phytotoxin]	GO:0048046 [Name: apoplast]; GO:0005829 [Name: cytosol]; GO:0000325 [Name: plant-type vacuole]	GO:0030170 [Name: pyridoxal phosphate binding]; GO:0008483 [Name: transaminase activity]; GO:0044540 [Name: L-cystine L-cysteine-lyase (deaminating)]; GO:0004121 [Name: cystathionine beta-lyase activity]	ath00960 [Pathway Title: Tropane piperidine and pyridine alkaloid biosynthesis]; ath00350 [Pathway Title: Tyrosine metabolism]; ath00400 [Pathway Title: Phenylalanine tyrosine and tryptophan biosynthesis]; ath01100 [Pathway Title: Metabolic pathways]; ath00130 [Pathway Title: Ubiquinone and other terpenoid-quinone biosynthesis]; ath00270 [Pathway Title: Cysteine and methionine metabolism]; ath011…
AT3G59140.1	3	21863420	21868701	-	ABCC10	multidrug resistance-associated protein 14	1	0	1	26	67	4	9.27	21.281	4.412	3.144	0.00166743	0.032419	0	0.9937	0.7726	0.7726	TRUE	0.091	GO:0055085 [Name: transmembrane transport]	GO:0016021 [Name: integral component of membrane]; GO:0000325 [Name: plant-type vacuole]; GO:0016020 [Name: membrane]; GO:0005829 [Name: cytosol]	GO:0005524 [Name: ATP binding]; GO:0008559 [Name: xenobiotic-transporting ATPase activity]; GO:0042626 [Name: ATPase activity coupled to transmembrane movement of substances]	-
AT2G38380.1	2	16076384	16078583	+	PER22	Peroxidase superfamily protein	0	0	3	32	48	31	12.71	20.15	4.333	3.991	6.57784e-05	0.00252233	0	0.7269	0.3602	0.3602	TRUE	1.0803	GO:0006979 [Name: response to oxidative stress]; GO:0042744 [Name: hydrogen peroxide catabolic process]; GO:0010043 [Name: response to zinc ion]	GO:0005773 [Name: vacuole]; GO:0005576 [Name: extracellular region]; GO:0099503 [Name: secretory vesicle]	GO:0004601 [Name: peroxidase activity]; GO:0046872 [Name: metal ion binding]; GO:0020037 [Name: heme binding]	ath00940 [Pathway Title: Phenylpropanoid biosynthesis]; ath01110 [Pathway Title: Biosynthesis of secondary metabolites]; ath01100 [Pathway Title: Metabolic pathways]
AT1G52690.2	1	19619745	19621534	+	AT1G52690	Late embryogenesis abundant protein (LEA) family protein	29	4	14	534	1113	172	187.55	19.768	4.305	8.165	3.20489e-16	1.88335e-13	0.235	0.0574	0.1558	0.1558	TRUE	0.2192	GO:0009414 [Name: response to water deprivation]; GO:0050821 [Name: protein stabilization]; GO:0050826 [Name: response to freezing]	GO:0005829 [Name: cytosol]	GO:0003674 [Name: molecular_function]	-
AT1G61800.1	1	22824440	22826774	+	GPT2	glucose-6-phosphate/phosphate translocator 2	12	1	13	270	593	29	88.21	17.848	4.158	5.01	5.43998e-07	4.91816e-05	0.6456	0.1122	0.4067	0.4067	TRUE	0.2535	GO:0015713 [Name: phosphoglycerate transport]; GO:0008643 [Name: carbohydrate transport]; GO:0015714 [Name: phosphoenolpyruvate transport]; GO:0009749 [Name: response to glucose]; GO:0035436 [Name: triose phosphate transmembrane transport]; GO:0009643 [Name: photosynthetic acclimation]; GO:0015760 [Name: glucose-6-phosphate transport]; GO:0009624 [Name: response to nematode]; GO:0009744 [Name: re…	GO:0016021 [Name: integral component of membrane]; GO:0005794 [Name: Golgi apparatus]; GO:0009507 [Name: chloroplast]; GO:0000325 [Name: plant-type vacuole]; GO:0031969 [Name: chloroplast membrane]	GO:0005315 [Name: inorganic phosphate transmembrane transporter activity]; GO:0015120 [Name: phosphoglycerate transmembrane transporter activity]; GO:0015152 [Name: glucose-6-phosphate transmembrane transporter activity]; GO:0071917 [Name: triose-phosphate transmembrane transporter activity]; GO:0015297 [Name: antiporter activity]	-
AT2G39030.1	2	16298227	16299202	+	NATA1	Acyl-CoA N-acyltransferases (NAT) superfamily protein	3	1	3	19	283	8	26.8	17.217	4.106	3.352	0.000802829	0.0185741	1.0723	0.3495	0.8119	0.8119	TRUE	6.7177	GO:0006591 [Name: ornithine metabolic process]; GO:0006952 [Name: defense response]; GO:0009753 [Name: response to jasmonic acid]	GO:0005737 [Name: cytoplasm]	GO:0008080 [Name: N-acetyltransferase activity]	-
AT2G38530.1	2	16128378	16129158	+	LTP2	lipid transfer protein 2	8	4	6	136	580	57	75.1	16.991	4.087	5.39	7.04172e-08	8.03508e-06	0.4603	0.1303	0.3176	0.3176	TRUE	0.2767	GO:0006649 [Name: phospholipid transfer to membrane]; GO:0009414 [Name: response to water deprivation]; GO:0090627 [Name: plant epidermal cell differentiation]; GO:0042335 [Name: cuticle development]; GO:1901957 [Name: regulation of cutin biosynthetic process]; GO:0006869 [Name: lipid transport]	GO:0009507 [Name: chloroplast]; GO:0005768 [Name: endosome]; GO:0005802 [Name: trans-Golgi network]; GO:0005886 [Name: plasma membrane]; GO:0005794 [Name: Golgi apparatus]; GO:0009505 [Name: plant-type cell wall]	GO:0008289 [Name: lipid binding]	-
AT3G26830.1	3	9887948	9889705	+	CYP71B15	Cytochrome P450 superfamily protein	1	0	3	35	101	5	13.48	16.939	4.082	3.171	0.00151824	0.0300403	0.8077	0.686	0.7595	0.7595	TRUE	0.0753	GO:0010112 [Name: regulation of systemic acquired resistance]; GO:0050832 [Name: defense response to fungus]; GO:0009617 [Name: response to bacterium]; GO:0009737 [Name: response to abscisic acid]; GO:0009700 [Name: indole phytoalexin biosynthetic process]; GO:0009625 [Name: response to insect]; GO:0010120 [Name: camalexin biosynthetic process]; GO:0006952 [Name: defense response]; GO:0009414 [Na…	GO:0016021 [Name: integral component of membrane]; GO:0005783 [Name: endoplasmic reticulum]; GO:0043231 [Name: intracellular membrane-bounded organelle]	GO:0004497 [Name: monooxygenase activity]; GO:0016705 [Name: oxidoreductase activity acting on paired donors with incorporation or reduction of molecular oxygen]; GO:0020037 [Name: heme binding]; GO:0010298 [Name: dihydrocamalexic acid decarboxylase activity]; GO:0005506 [Name: iron ion binding]	ath01110 [Pathway Title: Biosynthesis of secondary metabolites]; ath01100 [Pathway Title: Metabolic pathways]; ath00945 [Pathway Title: Stilbenoid diarylheptanoid and gingerol biosynthesis]; ath00903 [Pathway Title: Limonene and pinene degradation]
AT3G48360.1	3	17908192	17910525	-	BT2	BTB and TAZ domain protein 2	3	1	4	74	104	65	28.57	16.803	4.071	6.109	1.00363e-09	1.87233e-07	0	0.3283	0.1147	0.1147	TRUE	0.1641	GO:0009733 [Name: response to auxin]; GO:0009409 [Name: response to cold]; GO:0010182 [Name: sugar mediated signaling pathway]; GO:0009737 [Name: response to abscisic acid]; GO:0009651 [Name: response to salt stress]; GO:0016567 [Name: protein ubiquitination]; GO:0009751 [Name: response to salicylic acid]; GO:0009753 [Name: response to jasmonic acid]; GO:0007623 [Name: circadian rhythm]; GO:00425…	GO:0005737 [Name: cytoplasm]; GO:0005634 [Name: nucleus]	GO:0046872 [Name: metal ion binding]; GO:0005516 [Name: calmodulin binding]	ath01100 [Pathway Title: Metabolic pathways]; ath00903 [Pathway Title: Limonene and pinene degradation]; ath00945 [Pathway Title: Stilbenoid diarylheptanoid and gingerol biosynthesis]; ath01110 [Pathway Title: Biosynthesis of secondary metabolites]
AT4G33467.2	4	16101464	16102196	-	AT4G33467	uncharacterized protein	6	1	1	79	154	25	27.28	16.294	4.026	4.574	4.77389e-06	0.000306599	0.3219	0.3435	0.3312	0.3312	TRUE	0.541	GO:0009737 [Name: response to abscisic acid]; GO:0009416 [Name: response to light stimulus]; GO:0009611 [Name: response to wounding]; GO:0032870 [Name: cellular response to hormone stimulus]; GO:1901701 [Name: cellular response to oxygen-containing compound]; GO:0009414 [Name: response to water deprivation]	GO:0005634 [Name: nucleus]	GO:0003674 [Name: molecular_function]	-
AT5G67480.2	5	26930940	26932756	-	BT4	BTB and TAZ domain protein 4	5	0	0	58	52	20	14.95	15.983	3.998	3.483	0.000495591	0.0127176	0.4781	0.6196	0.5668	0.5668	TRUE	1.3735	GO:0016567 [Name: protein ubiquitination]; GO:0006355 [Name: regulation of transcription DNA-templated]; GO:0009611 [Name: response to wounding]; GO:0009733 [Name: response to auxin]; GO:0009739 [Name: response to gibberellin]; GO:0009753 [Name: response to jasmonic acid]; GO:0009651 [Name: response to salt stress]; GO:0042542 [Name: response to hydrogen peroxide]; GO:0009751 [Name: response to s…	GO:0005737 [Name: cytoplasm]; GO:0000325 [Name: plant-type vacuole]	GO:0005516 [Name: calmodulin binding]; GO:0046872 [Name: metal ion binding]	-
AT5G52390.1	5	21263936	21265264	-	AT5G52390	PAR1 protein	4	1	9	104	231	39	39.27	13.348	3.739	5.141	2.73021e-07	2.71934e-05	0.2495	0.2412	0.2461	0.2461	TRUE	0.1539	GO:0009737 [Name: response to abscisic acid]; GO:1901701 [Name: cellular response to oxygen-containing compound]	-	GO:0003674 [Name: molecular_function]	-
AT3G03341.1	3	790130	790648	-	AT3G03341	cold-regulated protein	15	0	5	111	290	45	45.98	12.645	3.66	4.727	2.27585e-06	0.000163597	0.4265	0.2073	0.3172	0.3172	TRUE	0.156	GO:0010150 [Name: leaf senescence]; GO:0006778 [Name: porphyrin-containing compound metabolic process]; GO:0033993 [Name: response to lipid]; GO:1901565 [Name: organonitrogen compound catabolic process]; GO:0009414 [Name: response to water deprivation]; GO:0009651 [Name: response to salt stress]; GO:0044248 [Name: cellular catabolic process]	GO:0016021 [Name: integral component of membrane]	GO:0003674 [Name: molecular_function]	-
AT2G43620.1	2	18093770	18095025	-	AT2G43620	Chitinase family protein	7	1	1	67	121	22	22.83	12.01	3.586	4.065	4.81093e-05	0.00198396	0.3071	0.4088	0.3508	0.3508	TRUE	1.7995	GO:0000272 [Name: polysaccharide catabolic process]; GO:0006952 [Name: defense response]; GO:0006032 [Name: chitin catabolic process]; GO:0016998 [Name: cell wall macromolecule catabolic process]; GO:0005975 [Name: carbohydrate metabolic process]	GO:0048046 [Name: apoplast]; GO:0099503 [Name: secretory vesicle]	GO:0004568 [Name: chitinase activity]; GO:0008061 [Name: chitin binding]	ath00520 [Pathway Title: Amino sugar and nucleotide sugar metabolism]
AT4G24440.2	4	12633180	12634760	+	TFIIA-S	transcription initiation factor IIA gamma chain / TFIIA-gamma (TFIIA-S)	6	0	0	48	34	25	13.21	11.911	3.574	3.023	0.00250284	0.0440687	0.5694	0.7003	0.6515	0.6515	TRUE	1.5417	GO:0006367 [Name: transcription initiation from RNA polymerase II promoter]; GO:0051123 [Name: RNA polymerase II transcriptional preinitiation complex assembly]	GO:0005672 [Name: transcription factor TFIIA complex]	GO:0017025 [Name: TBP-class protein binding]; GO:0016251 [Name: obsolete general RNA polymerase II transcription factor activity]	ath03022 [Pathway Title: Basal transcription factors]
AT1G26260.2	1	9086853	9089378	+	BHLH76	cryptochrome-interacting basic-helix-loop-helix 5	0	0	5	26	49	29	12.04	11.738	3.553	3.129	0.00175316	0.0336131	0	0.7673	0.5608	0.5608	TRUE	2.1889	GO:0040008 [Name: regulation of growth]; GO:0006355 [Name: regulation of transcription DNA-templated]; GO:0009911 [Name: positive regulation of flower development]; GO:0009637 [Name: response to blue light]	GO:0005634 [Name: nucleus]	GO:0003700 [Name: transcription factor activity sequence-specific DNA binding]; GO:0003677 [Name: DNA binding]; GO:0046983 [Name: protein dimerization activity]	-
AT2G36640.1	2	15356834	15358612	-	ATECP63	embryonic cell protein 63	3	0	2	21	57	26	11.51	11.488	3.522	3.73	0.000191536	0.00590073	0	0.8021	0.2894	0.2894	TRUE	0.1963	GO:0048316 [Name: seed development]; GO:0071396 [Name: cellular response to lipid]; GO:0009414 [Name: response to water deprivation]	GO:0005829 [Name: cytosol]	-	-
AT4G38410.1	4	17980940	17981719	+	AT4G38410	Dehydrin family protein	4	2	2	48	91	31	19.92	10.389	3.377	4.383	1.16791e-05	0.000626776	0.038	0.4672	0.2208	0.2208	TRUE	0.3494	GO:0009414 [Name: response to water deprivation]; GO:0009737 [Name: response to abscisic acid]; GO:0009631 [Name: cold acclimation]; GO:0009415 [Name: response to water]	GO:0005829 [Name: cytosol]; GO:0016020 [Name: membrane]	GO:0003674 [Name: molecular_function]	-
AT4G32620.2	4	15731508	15737272	+	AT4G32620	Enhancer of polycomb-like transcription factor protein	26	2	0	129	267	97	55.78	10.024	3.325	3.594	0.000325504	0.00905479	1.107	0.1724	0.5286	0.5286	TRUE	2.9745	GO:0006281 [Name: DNA repair]; GO:0007064 [Name: mitotic sister chromatid cohesion]; GO:0016575 [Name: histone deacetylation]	GO:0032991 [Name: macromolecular complex]; GO:0000785 [Name: chromatin]; GO:0005634 [Name: nucleus]	GO:0005515 [Name: protein binding]	-
AT2G18660.1	2	8090658	8091656	-	EGC2	plant natriuretic peptide A	4	2	11	109	239	7	36.99	9.32	3.22	3.159	0.00158153	0.0309795	0.8607	0.2556	0.6267	0.6267	TRUE	0.3134	GO:0010230 [Name: alternative respiration]; GO:0009627 [Name: systemic acquired resistance]	GO:0048046 [Name: apoplast]	GO:0051428 [Name: peptide hormone receptor binding]	-
AT1G66760.2	1	24901978	24904443	+	AT1G66760	MATE efflux family protein	7	0	4	45	119	25	19.99	9.318	3.22	3.975	7.03234e-05	0.00267047	0.1742	0.4655	0.2869	0.2869	TRUE	0.1212	GO:1990961 [Name: drug transmembrane export]; GO:0009611 [Name: response to wounding]	GO:0016021 [Name: integral component of membrane]; GO:0016020 [Name: membrane]	GO:0015297 [Name: antiporter activity]; GO:0042910 [Name: xenobiotic transporter activity]; GO:0022857 [Name: transmembrane transporter activity]	-
AT3G49110.1	3	18200664	18203142	+	PER33	peroxidase CA	11	3	11	152	193	81	51.27	9.154	3.194	6.705	2.00814e-11	6.04139e-09	0	0.1868	0.0915	0.0915	TRUE	0.1167	GO:0006979 [Name: response to oxidative stress]; GO:0042744 [Name: hydrogen peroxide catabolic process]; GO:0042742 [Name: defense response to bacterium]; GO:0072593 [Name: reactive oxygen species metabolic process]; GO:0009416 [Name: response to light stimulus]; GO:0050832 [Name: defense response to fungus]; GO:0009826 [Name: unidimensional cell growth]; GO:0006952 [Name: defense response]; GO:0…	GO:0005576 [Name: extracellular region]; GO:0005773 [Name: vacuole]; GO:0099503 [Name: secretory vesicle]; GO:0000325 [Name: plant-type vacuole]; GO:0005829 [Name: cytosol]; GO:0009505 [Name: plant-type cell wall]	GO:0020037 [Name: heme binding]; GO:0046872 [Name: metal ion binding]; GO:0004601 [Name: peroxidase activity]	ath01100 [Pathway Title: Metabolic pathways]; ath00940 [Pathway Title: Phenylpropanoid biosynthesis]; ath01110 [Pathway Title: Biosynthesis of secondary metabolites]
AT5G52300.1	5	21237056	21239529	+	LTI65	CAP160 protein	16	0	4	96	175	33	33.12	9.025	3.174	3.875	0.000106613	0.00379703	0.4382	0.2844	0.3626	0.3626	TRUE	2.9851	GO:0009409 [Name: response to cold]; GO:0009651 [Name: response to salt stress]; GO:0009737 [Name: response to abscisic acid]; GO:0009414 [Name: response to water deprivation]; GO:0009738 [Name: abscisic acid-activated signaling pathway]; GO:0010150 [Name: leaf senescence]	GO:0005737 [Name: cytoplasm]	GO:0003674 [Name: molecular_function]	-
AT2G30540.1	2	13011105	13011784	-	GRXS9	Thioredoxin superfamily protein	2	0	8	47	88	27	18.22	8.938	3.16	3.666	0.000246126	0.00724946	0.1399	0.5099	0.3355	0.3355	TRUE	1.8976	GO:0009059 [Name: macromolecule biosynthetic process]; GO:0071310 [Name: cellular response to organic substance]	GO:0005634 [Name: nucleus]; GO:0005737 [Name: cytoplasm]	GO:0097573 [Name: glutathione oxidoreductase activity]; GO:0051537 [Name: 2 iron 2 sulfur cluster binding]; GO:0046872 [Name: metal ion binding]	-
AT5G22500.1	5	7470443	7474120	+	FAR1	fatty acid reductase 1	4	1	1	28	64	16	12.19	8.912	3.156	3.359	0.000781467	0.0182415	0	0.7576	0.3412	0.3412	TRUE	0.2156	GO:0006629 [Name: lipid metabolic process]; GO:0009611 [Name: response to wounding]; GO:0009651 [Name: response to salt stress]; GO:0035336 [Name: long-chain fatty-acyl-CoA metabolic process]; GO:0010345 [Name: suberin biosynthetic process]	GO:0009507 [Name: chloroplast]; GO:0043231 [Name: intracellular membrane-bounded organelle]; GO:0005886 [Name: plasma membrane]	GO:0050062 [Name: long-chain-fatty-acyl-CoA reductase activity]; GO:0080019 [Name: fatty-acyl-CoA reductase (alcohol-forming) activity]	ath04146 [Pathway Title: Peroxisome]; ath00073 [Pathway Title: Cutin suberine and wax biosynthesis]
AT4G37980.1	4	17852441	17854500	+	CAD7	cinnamyl alcohol dehydrogenase 7	11	0	9	75	207	26	31.99	8.433	3.076	3.829	0.000128851	0.00437051	0.39	0.2942	0.3476	0.3476	TRUE	0.0609	GO:0009617 [Name: response to bacterium]; GO:0010597 [Name: green leaf volatile biosynthetic process]; GO:0009809 [Name: lignin biosynthetic process]	GO:0005886 [Name: plasma membrane]	GO:0045551 [Name: cinnamyl-alcohol dehydrogenase activity]; GO:0016616 [Name: oxidoreductase activity acting on the CH-OH group of donors NAD or NADP as acceptor]; GO:0052747 [Name: sinapyl alcohol dehydrogenase activity]; GO:0008270 [Name: zinc ion binding]; GO:0016491 [Name: oxidoreductase activity]	ath01110 [Pathway Title: Biosynthesis of secondary metabolites]; ath00940 [Pathway Title: Phenylpropanoid biosynthesis]; ath01100 [Pathway Title: Metabolic pathways]
AT1G52030.1	1	19345940	19349088	-	F-ATMBP	myrosinase-binding protein 2	30	0	47	213	780	93	111.28	8.14	3.025	3.93	8.50163e-05	0.00313228	0.9096	0.0908	0.3882	0.3882	TRUE	0.232	GO:0007155 [Name: cell adhesion]; GO:0006952 [Name: defense response]; GO:0009908 [Name: flower development]; GO:0009611 [Name: response to wounding]	GO:0010169 [Name: thioglucosidase complex]	GO:0010180 [Name: thioglucosidase binding]; GO:0030246 [Name: carbohydrate binding]	-
AT4G23680.1	4	12336186	12337482	-	AT4G23680	Polyketide cyclase/dehydrase and lipid transport superfamily protein	10	2	5	71	185	25	30.46	7.945	2.99	4.022	5.77115e-05	0.00230317	0.2678	0.3085	0.2818	0.2818	TRUE	0.0656	GO:0006952 [Name: defense response]	GO:0005829 [Name: cytosol]	GO:0003674 [Name: molecular_function]	-
AT4G29030.1	4	14307249	14307973	+	AT4G29030	Putative membrane lipoprotein	5	2	2	34	72	29	16.5	7.441	2.896	3.785	0.000153472	0.00497586	0.0108	0.562	0.2299	0.2299	TRUE	0.5317	GO:0010468 [Name: regulation of gene expression]; GO:0030154 [Name: cell differentiation]; GO:0009409 [Name: response to cold]; GO:0009888 [Name: tissue development]; GO:0043170 [Name: macromolecule metabolic process]	-	GO:0003674 [Name: molecular_function]	-
AT3G02480.1	3	512312	513027	+	AT3G02480	Late embryogenesis abundant protein (LEA) family protein	30	5	5	210	278	42	63.04	6.786	2.763	3.675	0.000237744	0.00709191	0.4965	0.1536	0.3513	0.3513	TRUE	0.3662	GO:0009414 [Name: response to water deprivation]	GO:0005829 [Name: cytosol]	GO:0003674 [Name: molecular_function]	-
AT2G47770.1	2	19568464	19569507	+	TSPO	TSPO(outer membrane tryptophan-rich sensory protein)-like protein	16	0	8	89	156	28	30.75	6.723	2.749	3.577	0.000347486	0.00951981	0.3388	0.3057	0.3234	0.3234	TRUE	2.0345	GO:0009737 [Name: response to abscisic acid]; GO:0006970 [Name: response to osmotic stress]; GO:0009651 [Name: response to salt stress]; GO:0006778 [Name: porphyrin-containing compound metabolic process]	GO:0016021 [Name: integral component of membrane]; GO:0000139 [Name: Golgi membrane]; GO:0005795 [Name: Golgi stack]; GO:0016020 [Name: membrane]; GO:0031969 [Name: chloroplast membrane]; GO:0005783 [Name: endoplasmic reticulum]; GO:0005789 [Name: endoplasmic reticulum membrane]; GO:0005794 [Name: Golgi apparatus]	GO:0020037 [Name: heme binding]	-
AT3G63060.1	3	23300290	23301473	-	EDL3	EID1-like 3	35	1	18	143	409	74	68.43	6.563	2.714	4.427	9.53669e-06	0.000540365	0.2936	0.1421	0.2229	0.2229	TRUE	0.1602	GO:0006996 [Name: organelle organization]; GO:0009737 [Name: response to abscisic acid]; GO:0006970 [Name: response to osmotic stress]; GO:0009651 [Name: response to salt stress]; GO:0010228 [Name: vegetative to reproductive phase transition of meristem]; GO:0009414 [Name: response to water deprivation]; GO:0010029 [Name: regulation of seed germination]; GO:0009738 [Name: abscisic acid-activated …	GO:0016021 [Name: integral component of membrane]; GO:0005634 [Name: nucleus]	GO:0004842 [Name: ubiquitin-protein transferase activity]; GO:0046872 [Name: metal ion binding]	-
AT2G29440.1	2	12620060	12621148	-	GSTU6	glutathione S-transferase tau 6	23	7	18	216	249	124	75.67	6.528	2.707	6.745	1.52668e-11	4.78481e-09	0.0453	0.1294	0.0767	0.0767	TRUE	0.6535	GO:0009407 [Name: toxin catabolic process]; GO:0006749 [Name: glutathione metabolic process]	GO:0005777 [Name: peroxisome]; GO:0005829 [Name: cytosol]; GO:0005737 [Name: cytoplasm]	GO:0004364 [Name: glutathione transferase activity]	ath00480 [Pathway Title: Glutathione metabolism]
AT5G43500.1	5	17469675	17473591	+	ARP9	actin-related protein 9	17	3	10	75	160	114	44.33	6.483	2.697	5.542	2.99418e-08	3.84596e-06	0	0.2147	0.1059	0.1059	TRUE	0.1353	GO:0006355 [Name: regulation of transcription DNA-templated]; GO:0006302 [Name: double-strand break repair]; GO:0006338 [Name: chromatin remodeling]	GO:0031011 [Name: Ino80 complex]	-	-
AT3G18000.1	3	6154363	6157552	+	NMT1	S-adenosyl-L-methionine-dependent methyltransferases superfamily protein	55	2	68	283	726	306	155.18	6.348	2.666	6.01	1.85087e-09	3.22271e-07	0.208	0.0675	0.1206	0.1206	TRUE	0.4766	GO:0009860 [Name: pollen tube growth]; GO:0009826 [Name: unidimensional cell growth]; GO:0042425 [Name: choline biosynthetic process]; GO:0010183 [Name: pollen tube guidance]; GO:0009555 [Name: pollen development]; GO:0032259 [Name: methylation]; GO:0006656 [Name: phosphatidylcholine biosynthetic process]; GO:0048528 [Name: post-embryonic root development]	GO:0005737 [Name: cytoplasm]	GO:0052667 [Name: phosphomethylethanolamine N-methyltransferase activity]; GO:0008168 [Name: methyltransferase activity]; GO:0000234 [Name: phosphoethanolamine N-methyltransferase activity]	ath00564 [Pathway Title: Glycerophospholipid metabolism]
AT5G15960.1	5	5209898	5210727	+	KIN1	stress-responsive protein (KIN1) / stress-induced protein (KIN1)	121	22	73	898	1262	377	310.73	6.238	2.641	7.944	1.95556e-15	1.0215e-12	0.09	0.0381	0.069	0.069	TRUE	0.2141	GO:0009631 [Name: cold acclimation]; GO:0010017 [Name: red or far-red light signaling pathway]; GO:0009414 [Name: response to water deprivation]; GO:0009737 [Name: response to abscisic acid]; GO:0009409 [Name: response to cold]; GO:0006970 [Name: response to osmotic stress]	GO:0005829 [Name: cytosol]	GO:0003674 [Name: molecular_function]	-
AT5G63350.1	5	25380000	25381183	-	AT5G63350	von willebrand factor A domain protein	25	3	16	112	351	70	59.27	6.181	2.628	4.892	9.9948e-07	8.0334e-05	0.1545	0.1628	0.1576	0.1576	TRUE	0.3448	GO:2000143 [Name: negative regulation of DNA-templated transcription initiation]	GO:0005634 [Name: nucleus]	GO:0005515 [Name: protein binding]	-
AT1G61120.1	1	22523637	22528811	+	GES	terpene synthase 04	25	6	23	242	339	68	77.83	6.074	2.603	4.958	7.12564e-07	6.06867e-05	0.1776	0.126	0.1588	0.1588	TRUE	0.3646	GO:0009753 [Name: response to jasmonic acid]; GO:0000304 [Name: response to singlet oxygen]; GO:0009617 [Name: response to bacterium]; GO:0080027 [Name: response to herbivore]; GO:0016102 [Name: diterpenoid biosynthetic process]; GO:0009611 [Name: response to wounding]	GO:0005737 [Name: cytoplasm]	GO:0010333 [Name: terpene synthase activity]; GO:0080013 [Name: (EE)-geranyllinalool synthase activity]; GO:0000287 [Name: magnesium ion binding]	ath00904 [Pathway Title: Diterpenoid biosynthesis]
AT4G11890.3	4	7148246	7149921	+	CRK45	Protein kinase superfamily protein	20	0	16	122	174	60	42.74	6.001	2.585	4.427	9.54018e-06	0.000540365	0.1326	0.2224	0.1799	0.1799	TRUE	0.2664	GO:0009414 [Name: response to water deprivation]; GO:0009737 [Name: response to abscisic acid]; GO:0009651 [Name: response to salt stress]; GO:0002239 [Name: response to oomycetes]; GO:0009409 [Name: response to cold]	GO:0005829 [Name: cytosol]; GO:0005634 [Name: nucleus]	GO:0004674 [Name: protein serine/threonine kinase activity]; GO:0005524 [Name: ATP binding]	-
AT3G45140.1	3	16525410	16529352	+	LOX2	lipoxygenase 2	117	18	58	460	1797	205	262.89	5.965	2.576	4.884	1.04146e-06	8.32669e-05	0.3079	0.0434	0.1873	0.1873	TRUE	0.2854	GO:0006633 [Name: fatty acid biosynthetic process]; GO:0009620 [Name: response to fungus]; GO:0009753 [Name: response to jasmonic acid]; GO:0034440 [Name: lipid oxidation]; GO:0009617 [Name: response to bacterium]; GO:0080027 [Name: response to herbivore]; GO:0009695 [Name: jasmonic acid biosynthetic process]; GO:0009611 [Name: response to wounding]; GO:0031408 [Name: oxylipin biosynthetic proces…	GO:0009507 [Name: chloroplast]; GO:0009535 [Name: chloroplast thylakoid membrane]; GO:0005829 [Name: cytosol]; GO:0009570 [Name: chloroplast stroma]; GO:0009941 [Name: chloroplast envelope]; GO:0005737 [Name: cytoplasm]	GO:0046872 [Name: metal ion binding]; GO:0016702 [Name: oxidoreductase activity acting on single donors with incorporation of molecular oxygen incorporation of two atoms of oxygen]; GO:1901149 [Name: salicylic acid binding]; GO:0016165 [Name: linoleate 13S-lipoxygenase activity]; GO:0003729 [Name: mRNA binding]	ath01100 [Pathway Title: Metabolic pathways]; ath00591 [Pathway Title: Linoleic acid metabolism]; ath00592 [Pathway Title: alpha-Linolenic acid metabolism]; ath01110 [Pathway Title: Biosynthesis of secondary metabolites]
AT3G28220.1	3	10524404	10526728	+	AT3G28220	TRAF-like family protein	31	4	26	109	552	82	79	5.956	2.574	4.317	1.58359e-05	0.000800512	0.2737	0.1243	0.2166	0.2166	TRUE	6.3734	GO:0009611 [Name: response to wounding]; GO:0006629 [Name: lipid metabolic process]; GO:0044550 [Name: secondary metabolite biosynthetic process]; GO:0016070 [Name: RNA metabolic process]; GO:0019438 [Name: aromatic compound biosynthetic process]; GO:0033993 [Name: response to lipid]; GO:1901362 [Name: organic cyclic compound biosynthetic process]; GO:1901566 [Name: organonitrogen compound biosyn…	GO:0016021 [Name: integral component of membrane]; GO:0000325 [Name: plant-type vacuole]; GO:0009941 [Name: chloroplast envelope]; GO:0005829 [Name: cytosol]	-	-
AT3G48510.1	3	17967354	17968538	-	AT3G48510	AtIII18x5-like protein	8	3	5	33	125	40	23.59	5.743	2.522	3.648	0.000264318	0.00766099	0.1435	0.3958	0.2289	0.2289	TRUE	0.2701	GO:2000143 [Name: negative regulation of DNA-templated transcription initiation]	GO:0005634 [Name: nucleus]	GO:0003674 [Name: molecular_function]	-
AT1G43160.1	1	16263813	16264818	+	RAP2-6	uncharacterized protein	14	3	6	92	139	29	31.6	5.713	2.514	3.771	0.000162679	0.00521683	0.197	0.2977	0.2323	0.2323	TRUE	1.1884	GO:0009751 [Name: response to salicylic acid]; GO:0009737 [Name: response to abscisic acid]; GO:0009658 [Name: chloroplast organization]; GO:0009651 [Name: response to salt stress]; GO:0009611 [Name: response to wounding]; GO:0009873 [Name: ethylene-activated signaling pathway]; GO:0009414 [Name: response to water deprivation]; GO:0034605 [Name: cellular response to heat]; GO:0045893 [Name: posit…	GO:0005634 [Name: nucleus]	GO:0003700 [Name: transcription factor activity sequence-specific DNA binding]; GO:0003677 [Name: DNA binding]	-
AT1G49500.1	1	18321295	18322284	-	AT1G49500	transcription initiation factor TFIID subunit 1b-like protein	44	2	40	286	332	175	100.94	5.694	2.509	6.162	7.17847e-10	1.38309e-07	0.0838	0.0992	0.0918	0.0918	TRUE	0.5596	GO:1901701 [Name: cellular response to oxygen-containing compound]; GO:0009737 [Name: response to abscisic acid]; GO:0044272 [Name: sulfur compound biosynthetic process]; GO:0031327 [Name: negative regulation of cellular biosynthetic process]; GO:0044248 [Name: cellular catabolic process]; GO:0071396 [Name: cellular response to lipid]; GO:0009415 [Name: response to water]; GO:0006355 [Name: regul…	-	GO:0003743 [Name: translation initiation factor activity]	-
AT5G59220.1	5	23894404	23896619	-	HAI1	PP2C protein (Clade A protein phosphatases type 2C)	304	30	203	1559	3253	663	637.2	5.675	2.505	6.905	5.03087e-12	1.81932e-09	0.1496	0.023	0.0895	0.0895	TRUE	0.1937	GO:0009414 [Name: response to water deprivation]; GO:0009737 [Name: response to abscisic acid]; GO:0010118 [Name: stomatal movement]; GO:0010150 [Name: leaf senescence]; GO:0009658 [Name: chloroplast organization]; GO:0009788 [Name: negative regulation of abscisic acid-activated signaling pathway]	GO:0033106 [Name: cis-Golgi network membrane]; GO:0005829 [Name: cytosol]; GO:0005634 [Name: nucleus]; GO:0005794 [Name: Golgi apparatus]	GO:0004722 [Name: protein serine/threonine phosphatase activity]; GO:0046872 [Name: metal ion binding]; GO:0016791 [Name: phosphatase activity]	ath04931 [Pathway Title: Insulin resistance]; ath04075 [Pathway Title: Plant hormone signal transduction]
AT4G27410.2	4	13707240	13709149	-	NAC072	NAC (No Apical Meristem) domain transcriptional regulator superfamily protein	97	15	35	498	842	249	193.26	5.653	2.499	6.213	5.20139e-10	1.02743e-07	0.1341	0.0559	0.1006	0.1006	TRUE	1.6437	GO:1900055 [Name: regulation of leaf senescence]; GO:0006355 [Name: regulation of transcription DNA-templated]	GO:0005634 [Name: nucleus]	GO:0043565 [Name: sequence-specific DNA binding]; GO:1990841 [Name: promoter-specific chromatin binding]; GO:0003677 [Name: DNA binding]	-
AT1G58225.1	1	21564111	21565171	+	AT1G58225	uncharacterized protein	9	2	11	88	110	33	28.88	5.64	2.496	4.082	4.45742e-05	0.0018673	0	0.3249	0.1785	0.1785	TRUE	0.0881	GO:0002237 [Name: response to molecule of bacterial origin]; GO:0031347 [Name: regulation of defense response]; GO:0042742 [Name: defense response to bacterium]; GO:0010035 [Name: response to inorganic substance]; GO:0009751 [Name: response to salicylic acid]; GO:0050832 [Name: defense response to fungus]; GO:0009627 [Name: systemic acquired resistance]	GO:0005739 [Name: mitochondrion]	GO:0003674 [Name: molecular_function]	-
AT1G16850.1	1	5764807	5765651	-	AT1G16850	uncharacterized protein	50	7	32	286	479	145	111.15	5.534	2.468	6.699	2.10375e-11	6.18135e-09	0.0638	0.0909	0.0733	0.0733	TRUE	0.914	GO:0009651 [Name: response to salt stress]	GO:0016021 [Name: integral component of membrane]; GO:0005783 [Name: endoplasmic reticulum]; GO:0005634 [Name: nucleus]	GO:0003674 [Name: molecular_function]	-
AT3G28600.1	3	10722437	10723995	+	AT3G28600	P-loop containing nucleoside triphosphate hydrolases superfamily protein	30	2	47	292	257	142	90.26	5.533	2.468	4.804	1.5534e-06	0.000117033	0.2026	0.1099	0.158	0.158	TRUE	1.9048	GO:0009651 [Name: response to salt stress]	GO:0005886 [Name: plasma membrane]; GO:0009507 [Name: chloroplast]	GO:0016887 [Name: ATPase activity]; GO:0005524 [Name: ATP binding]	-
AT1G18710.1	1	6450594	6453114	+	AtMYB47	myb domain protein 47	19	2	4	65	157	35	30	5.401	2.433	3.443	0.000574538	0.0143366	0.2428	0.3131	0.2704	0.2704	TRUE	0.2464	GO:0010214 [Name: seed coat development]	GO:0005737 [Name: cytoplasm]; GO:0005634 [Name: nucleus]	GO:0003700 [Name: transcription factor activity sequence-specific DNA binding]	-
AT2G43590.1	2	18081331	18082767	-	AT2G43590	Chitinase family protein	11	3	11	120	112	23	32.61	5.312	2.409	3.36	0.000780735	0.0182415	0.2856	0.2888	0.2869	0.2869	TRUE	0.0953	GO:0016998 [Name: cell wall macromolecule catabolic process]; GO:0006032 [Name: chitin catabolic process]; GO:0006952 [Name: defense response]; GO:0005975 [Name: carbohydrate metabolic process]; GO:0000272 [Name: polysaccharide catabolic process]	GO:0099503 [Name: secretory vesicle]	GO:0008061 [Name: chitin binding]; GO:0004568 [Name: chitinase activity]	ath00520 [Pathway Title: Amino sugar and nucleotide sugar metabolism]
AT2G22470.1	2	9538197	9538879	-	AGP2	arabinogalactan protein 2	100	12	72	606	810	285	214.54	5.266	2.397	7.476	7.65437e-14	3.33192e-11	0.0673	0.0513	0.0611	0.0611	TRUE	0.0941	GO:0042742 [Name: defense response to bacterium]; GO:0090558 [Name: plant epidermis development]; GO:0006970 [Name: response to osmotic stress]; GO:0019438 [Name: aromatic compound biosynthetic process]; GO:0009737 [Name: response to abscisic acid]; GO:0010015 [Name: root morphogenesis]; GO:0050832 [Name: defense response to fungus]; GO:1901362 [Name: organic cyclic compound biosynthetic process]…	GO:0005737 [Name: cytoplasm]; GO:0031225 [Name: anchored component of membrane]; GO:0005886 [Name: plasma membrane]	-	-
AT1G23130.1	1	8200383	8201235	+	AT1G23130	Polyketide cyclase/dehydrase and lipid transport superfamily protein	10	3	6	49	157	19	25.5	5.248	2.392	3.092	0.00199132	0.0370316	0.3063	0.3669	0.3264	0.3264	TRUE	0.1376	GO:0006952 [Name: defense response]	GO:0005634 [Name: nucleus]; GO:0005829 [Name: cytosol]	GO:0003674 [Name: molecular_function]	-
AT4G11350.1	4	6901682	6904244	+	AT4G11350	transferring glycosyl group transferase (DUF604)	20	1	20	125	176	69	45.9	5.246	2.391	4.931	8.1773e-07	6.79207e-05	0.0499	0.2077	0.1158	0.1158	TRUE	0.1287	GO:0009620 [Name: response to fungus]; GO:0006970 [Name: response to osmotic stress]; GO:0009416 [Name: response to light stimulus]; GO:0042742 [Name: defense response to bacterium]; GO:0009753 [Name: response to jasmonic acid]; GO:0031347 [Name: regulation of defense response]; GO:0009737 [Name: response to abscisic acid]; GO:0009414 [Name: response to water deprivation]; GO:0010150 [Name: leaf …	GO:0016021 [Name: integral component of membrane]	GO:0008375 [Name: acetylglucosaminyltransferase activity]	-
AT5G06760.1	5	2089492	2090430	-	LEA4-5	Late Embryogenesis Abundant 4-5	83	11	34	421	688	137	150.82	5.174	2.371	4.932	8.12567e-07	6.79207e-05	0.202	0.0692	0.1471	0.1471	TRUE	2.3959	GO:0009793 [Name: embryo development ending in seed dormancy]; GO:0009409 [Name: response to cold]; GO:0006970 [Name: response to osmotic stress]; GO:0009414 [Name: response to water deprivation]; GO:0048316 [Name: seed development]	GO:0005829 [Name: cytosol]	GO:0005034 [Name: osmosensor activity]	-
AT1G73390.3	1	27590810	27595142	-	AT1G73390	Endosomal targeting BRO1-like domain-containing protein	37	6	22	184	229	158	76.64	5.017	2.327	6.636	3.21644e-11	9.18008e-09	0	0.1279	0.0574	0.0574	TRUE	0.2949	GO:0019748 [Name: secondary metabolic process]; GO:0044281 [Name: small molecule metabolic process]; GO:0009414 [Name: response to water deprivation]; GO:0009738 [Name: abscisic acid-activated signaling pathway]; GO:0009416 [Name: response to light stimulus]	GO:0005739 [Name: mitochondrion]	GO:0003674 [Name: molecular_function]	-
AT1G56230.2	1	21046010	21049194	-	AT1G56230	enolase (DUF1399)	15	0	6	58	91	24	20.74	4.974	2.315	2.967	0.00301174	0.0499605	0.2211	0.449	0.3216	0.3216	TRUE	1.3147	GO:0071310 [Name: cellular response to organic substance]; GO:0009892 [Name: negative regulation of metabolic process]; GO:0010468 [Name: regulation of gene expression]; GO:0033993 [Name: response to lipid]; GO:1901701 [Name: cellular response to oxygen-containing compound]; GO:0007165 [Name: signal transduction]; GO:0016070 [Name: RNA metabolic process]	GO:0005886 [Name: plasma membrane]; GO:0005634 [Name: nucleus]	GO:0003674 [Name: molecular_function]	-
AT2G02010.1	2	474165	476594	-	GAD4	glutamate decarboxylase 4	5	3	4	47	54	23	16.94	4.968	2.313	3.036	0.00239689	0.0427151	0.1038	0.5478	0.2714	0.2714	TRUE	0.3528	GO:0006538 [Name: glutamate catabolic process]	GO:0005739 [Name: mitochondrion]; GO:0005829 [Name: cytosol]	GO:0005516 [Name: calmodulin binding]; GO:0004351 [Name: glutamate decarboxylase activity]; GO:0030170 [Name: pyridoxal phosphate binding]	ath01100 [Pathway Title: Metabolic pathways]; ath00410 [Pathway Title: beta-Alanine metabolism]; ath00250 [Pathway Title: Alanine aspartate and glutamate metabolism]; ath01110 [Pathway Title: Biosynthesis of secondary metabolites]; ath00430 [Pathway Title: Taurine and hypotaurine metabolism]; ath00650 [Pathway Title: Butanoate metabolism]
AT5G15800.1	5	5151334	5154154	-	SEP1	K-box region and MADS-box transcription factor family protein	9	1	13	67	128	17	24.73	4.882	2.288	2.969	0.00298576	0.0497401	0.2996	0.3779	0.327	0.327	TRUE	1.025	GO:0030154 [Name: cell differentiation]; GO:0045944 [Name: positive regulation of transcription from RNA polymerase II promoter]; GO:0048481 [Name: plant ovule development]; GO:0006357 [Name: regulation of transcription from RNA polymerase II promoter]	GO:0005634 [Name: nucleus]	GO:0046983 [Name: protein dimerization activity]; GO:0000978 [Name: RNA polymerase II core promoter proximal region sequence-specific DNA binding]; GO:0000981 [Name: RNA polymerase II transcription factor activity sequence-specific DNA binding]; GO:0000977 [Name: RNA polymerase II regulatory region sequence-specific DNA binding]; GO:0003700 [Name: transcription factor activity sequence-specific D…	-
AT1G78850.1	1	29641926	29643431	-	AT1G78850	D-mannose binding lectin protein with Apple-like carbohydrate-binding domain-containing protein	62	21	78	502	647	340	198.54	4.827	2.271	8.045	8.63643e-16	4.61382e-13	0.0377	0.0547	0.0445	0.0445	TRUE	0.7384	GO:0071456 [Name: cellular response to hypoxia]; GO:1904383 [Name: response to sodium phosphate]	GO:0099503 [Name: secretory vesicle]; GO:0005739 [Name: mitochondrion]; GO:0000325 [Name: plant-type vacuole]; GO:0005794 [Name: Golgi apparatus]; GO:0048046 [Name: apoplast]	GO:0030246 [Name: carbohydrate binding]; GO:0005539 [Name: glycosaminoglycan binding]	-
AT2G20870.1	2	8981988	8982712	-	AT2G20870	cell wall protein precursor	9	1	12	42	119	36	23.53	4.752	2.249	3.606	0.000311339	0.00881727	0.08	0.3969	0.1843	0.1843	TRUE	1.1049	GO:0008150 [Name: biological_process]	GO:0005576 [Name: extracellular region]	GO:0003674 [Name: molecular_function]	-
AT3G29575.1	3	11382214	11384004	-	AFP3	ABI five binding protein 3	58	10	56	312	681	150	137.34	4.742	2.245	5.719	1.07259e-08	1.58569e-06	0.1019	0.0752	0.0921	0.0921	TRUE	0.1204	GO:0007165 [Name: signal transduction]; GO:0009737 [Name: response to abscisic acid]; GO:0045892 [Name: negative regulation of transcription DNA-templated]	GO:0005634 [Name: nucleus]	GO:0005515 [Name: protein binding]	-
AT4G08870.1	4	5646439	5648727	-	ARGAH2	Arginase/deacetylase superfamily protein	42	17	35	162	951	85	128.98	4.7	2.233	3.317	0.000911107	0.0203967	0.4787	0.0795	0.3041	0.3041	TRUE	1.3853	GO:0009445 [Name: putrescine metabolic process]; GO:0009446 [Name: putrescine biosynthetic process]; GO:0050832 [Name: defense response to fungus]; GO:0006591 [Name: ornithine metabolic process]; GO:0006570 [Name: tyrosine metabolic process]; GO:0000050 [Name: urea cycle]; GO:0006560 [Name: proline metabolic process]; GO:0033389 [Name: putrescine biosynthetic process from arginine using agmatinas…	GO:0005739 [Name: mitochondrion]; GO:0009570 [Name: chloroplast stroma]; GO:0005829 [Name: cytosol]	GO:0050897 [Name: cobalt ion binding]; GO:0008783 [Name: agmatinase activity]; GO:0004053 [Name: arginase activity]; GO:0046872 [Name: metal ion binding]; GO:0016787 [Name: hydrolase activity]	ath01230 [Pathway Title: Biosynthesis of amino acids]; ath01100 [Pathway Title: Metabolic pathways]; ath01130 [Pathway Title: Biosynthesis of antibiotics]; ath00330 [Pathway Title: Arginine and proline metabolism]; ath00220 [Pathway Title: Arginine biosynthesis]; ath01110 [Pathway Title: Biosynthesis of secondary metabolites]
AT2G42540.2	2	17711032	17712092	-	COR15A	cold-regulated 15a	321	80	252	1713	2907	1165	751.27	4.498	2.169	11.215	3.45297e-29	1.15951e-25	0.0252	0.0209	0.0235	0.0235	TRUE	0.2962	GO:0009667 [Name: plastid inner membrane organization]; GO:0050826 [Name: response to freezing]; GO:0051260 [Name: protein homooligomerization]; GO:0009737 [Name: response to abscisic acid]; GO:0050821 [Name: protein stabilization]; GO:0009644 [Name: response to high light intensity]; GO:0010150 [Name: leaf senescence]; GO:0051259 [Name: protein oligomerization]; GO:0006970 [Name: response to osm…	GO:0009507 [Name: chloroplast]; GO:0009941 [Name: chloroplast envelope]; GO:0009570 [Name: chloroplast stroma]; GO:0005829 [Name: cytosol]	GO:0008289 [Name: lipid binding]; GO:0005534 [Name: galactose binding]	-
AT5G24780.2	5	8507590	8508957	-	VSP1	vegetative storage protein 1	19	3	11	98	118	50	35.24	4.477	2.163	4.31	1.62903e-05	0.000814627	0	0.2679	0.1188	0.1188	TRUE	0.2093	GO:0006952 [Name: defense response]; GO:0009753 [Name: response to jasmonic acid]; GO:0016311 [Name: dephosphorylation]	GO:0009507 [Name: chloroplast]; GO:0000325 [Name: plant-type vacuole]	GO:0045735 [Name: nutrient reservoir activity]	-
AT2G43570.1	2	18076224	18077463	-	CHI	chitinase	44	4	51	216	481	105	96.33	4.469	2.16	4.571	4.85148e-06	0.000310732	0.1514	0.1035	0.135	0.135	TRUE	0.1047	GO:0016998 [Name: cell wall macromolecule catabolic process]; GO:0010272 [Name: response to silver ion]; GO:0009615 [Name: response to virus]; GO:0006032 [Name: chitin catabolic process]; GO:0072722 [Name: response to amitrole]; GO:0009627 [Name: systemic acquired resistance]; GO:0010150 [Name: leaf senescence]; GO:0000272 [Name: polysaccharide catabolic process]; GO:0006952 [Name: defense respon…	GO:0099503 [Name: secretory vesicle]; GO:0048046 [Name: apoplast]	GO:0008061 [Name: chitin binding]; GO:0004568 [Name: chitinase activity]	ath00520 [Pathway Title: Amino sugar and nucleotide sugar metabolism]
AT3G08770.1	3	2664139	2664828	-	LTP6	lipid transfer protein 6	25	3	25	103	302	50	53.12	4.44	2.15	3.759	0.000170935	0.00540053	0.1963	0.1806	0.1907	0.1907	TRUE	0.142	GO:0006869 [Name: lipid transport]	GO:0005576 [Name: extracellular region]	GO:0008289 [Name: lipid binding]	-
AT3G43270.1	3	15222125	15225460	-	PME32	Plant invertase/pectin methylesterase inhibitor superfamily	112	19	105	623	932	346	245.85	4.39	2.134	8.429	3.48548e-17	2.82516e-14	0.0317	0.0458	0.0365	0.0365	TRUE	0.2538	GO:0042545 [Name: cell wall modification]; GO:0045490 [Name: pectin catabolic process]	GO:0005576 [Name: extracellular region]	GO:0046910 [Name: pectinesterase inhibitor activity]; GO:0045330 [Name: aspartyl esterase activity]; GO:0030599 [Name: pectinesterase activity]; GO:0004857 [Name: enzyme inhibitor activity]	ath01100 [Pathway Title: Metabolic pathways]; ath00040 [Pathway Title: Pentose and glucuronate interconversions]; ath00500 [Pathway Title: Starch and sucrose metabolism]
AT2G05520.6	2	2026162	2027117	+	GRP3	glycine-rich protein 3	14	8	12	73	203	68	44.29	4.361	2.125	3.754	0.000173885	0.00547167	0.1509	0.2149	0.1767	0.1767	TRUE	0.9559	GO:0009751 [Name: response to salicylic acid]; GO:0048364 [Name: root development]; GO:0009723 [Name: response to ethylene]; GO:0010044 [Name: response to aluminum ion]; GO:0008361 [Name: regulation of cell size]; GO:0009737 [Name: response to abscisic acid]; GO:0009826 [Name: unidimensional cell growth]; GO:0009269 [Name: response to desiccation]	GO:0005739 [Name: mitochondrion]; GO:0005576 [Name: extracellular region]	GO:0005515 [Name: protein binding]	-
AT1G52890.1	1	19697004	19698482	-	NAC019	NAC domain containing protein 19	289	38	225	1457	2191	598	541.46	4.29	2.101	6.871	6.36273e-12	2.23228e-09	0.0902	0.0256	0.0624	0.0624	TRUE	0.667	GO:0009414 [Name: response to water deprivation]; GO:0006355 [Name: regulation of transcription DNA-templated]	GO:0005634 [Name: nucleus]	GO:0003677 [Name: DNA binding]; GO:0003700 [Name: transcription factor activity sequence-specific DNA binding]	-
AT3G54820.1	3	20302021	20304010	+	PIP2-5	plasma membrane intrinsic protein 2;5	58	18	39	295	514	193	131.88	4.255	2.089	6.178	6.50749e-10	1.26417e-07	0.0548	0.0779	0.0645	0.0645	TRUE	0.6207	GO:0006833 [Name: water transport]	GO:0016021 [Name: integral component of membrane]; GO:0005886 [Name: plasma membrane]	GO:0015267 [Name: channel activity]; GO:0015250 [Name: water channel activity]	-
AT2G24850.1	2	10582830	10585216	-	TAT3	tyrosine aminotransferase 3	30	19	34	247	576	102	113.4	4.224	2.078	3.649	0.00026374	0.00766099	0.3044	0.0892	0.2107	0.2107	TRUE	0.2381	GO:0006520 [Name: cellular amino acid metabolic process]; GO:0009058 [Name: biosynthetic process]; GO:0009753 [Name: response to jasmonic acid]; GO:0009611 [Name: response to wounding]	GO:0005737 [Name: cytoplasm]	GO:0030170 [Name: pyridoxal phosphate binding]; GO:0008483 [Name: transaminase activity]; GO:0004838 [Name: L-tyrosine:2-oxoglutarate aminotransferase activity]	ath00360 [Pathway Title: Phenylalanine metabolism]; ath00400 [Pathway Title: Phenylalanine tyrosine and tryptophan biosynthesis]; ath00950 [Pathway Title: Isoquinoline alkaloid biosynthesis]; ath01110 [Pathway Title: Biosynthesis of secondary metabolites]; ath01130 [Pathway Title: Biosynthesis of antibiotics]; ath00270 [Pathway Title: Cysteine and methionine metabolism]; ath00960 [Pathway Title: …
AT1G58270.1	1	21612116	21614117	-	ZW9	TRAF-like family protein	31	4	15	126	184	64	48.81	4.119	2.042	4.404	1.06363e-05	0.000586894	0.0652	0.1958	0.1109	0.1109	TRUE	0.3491	GO:0090558 [Name: plant epidermis development]; GO:0044255 [Name: cellular lipid metabolic process]; GO:0006970 [Name: response to osmotic stress]; GO:0009059 [Name: macromolecule biosynthetic process]; GO:0009753 [Name: response to jasmonic acid]; GO:0042546 [Name: cell wall biogenesis]; GO:1901135 [Name: carbohydrate derivative metabolic process]; GO:0009414 [Name: response to water deprivation…	GO:0009506 [Name: plasmodesma]; GO:0016021 [Name: integral component of membrane]; GO:0005634 [Name: nucleus]	-	-
AT5G17460.1	5	5757098	5759795	-	AT5G17460	glutamyl-tRNA (Gln) amidotransferase subunit C	147	18	79	600	884	309	233.82	4.111	2.039	6.534	6.42212e-11	1.71544e-08	0.0676	0.0478	0.0599	0.0599	TRUE	0.3345	GO:2000214 [Name: regulation of proline metabolic process]	GO:0005739 [Name: mitochondrion]; GO:0005634 [Name: nucleus]	GO:0016740 [Name: transferase activity]	-
AT2G41190.1	2	17167279	17170407	-	AT2G41190	Transmembrane amino acid transporter family protein	78	7	61	337	580	112	128.41	3.969	1.989	4.232	2.31441e-05	0.00108805	0.1835	0.0798	0.1404	0.1404	TRUE	2.3413	GO:0006865 [Name: amino acid transport]	GO:0000325 [Name: plant-type vacuole]; GO:0016021 [Name: integral component of membrane]; GO:0005886 [Name: plasma membrane]	GO:0015171 [Name: amino acid transmembrane transporter activity]	-
AT2G47780.1	2	19570049	19571034	+	AT2G47780	Rubber elongation factor protein (REF)	51	5	29	191	299	104	77.38	3.95	1.982	5.039	4.67101e-07	4.33979e-05	0.0593	0.1267	0.0839	0.0839	TRUE	0.7682	GO:0045927 [Name: positive regulation of growth]; GO:0034389 [Name: lipid particle organization]; GO:1902584 [Name: positive regulation of response to water deprivation]; GO:0080186 [Name: developmental vegetative growth]	GO:0005811 [Name: lipid particle]	GO:0003674 [Name: molecular_function]	-
AT3G57260.1	3	21188517	21189859	-	BG2	beta-13-glucanase 2	143	48	156	601	2250	373	380.86	3.934	1.976	4.524	6.06726e-06	0.000366624	0.2143	0.0327	0.1307	0.1307	TRUE	0.7101	GO:0009409 [Name: response to cold]; GO:0009627 [Name: systemic acquired resistance]; GO:0005975 [Name: carbohydrate metabolic process]	GO:0000325 [Name: plant-type vacuole]; GO:0005829 [Name: cytosol]; GO:0048046 [Name: apoplast]; GO:0005783 [Name: endoplasmic reticulum]; GO:0046658 [Name: anchored component of plasma membrane]; GO:0099503 [Name: secretory vesicle]	GO:0042973 [Name: glucan endo-13-beta-D-glucosidase activity]; GO:0008810 [Name: cellulase activity]; GO:0004338 [Name: glucan exo-13-beta-glucosidase activity]	-
AT3G05640.2	3	1640401	1643138	-	AT3G05640	Protein phosphatase 2C family protein	141	36	123	593	952	543	291.39	3.722	1.896	10.375	3.22614e-25	6.89398e-22	0.0021	0.04	0.0171	0.0171	TRUE	0.1603	GO:0006470 [Name: protein dephosphorylation]; GO:0009414 [Name: response to water deprivation]; GO:1904526 [Name: regulation of microtubule binding]; GO:0045926 [Name: negative regulation of growth]	GO:0005634 [Name: nucleus]; GO:0005886 [Name: plasma membrane]; GO:0005829 [Name: cytosol]	GO:0004722 [Name: protein serine/threonine phosphatase activity]; GO:0046872 [Name: metal ion binding]	-
AT1G68050.1	1	25508676	25510889	+	ADO3	flavin-binding kelch repeat f box 1	12	3	11	60	97	27	24.47	3.632	1.861	3.212	0.00131985	0.0269778	0	0.3819	0.1623	0.1623	TRUE	0.8263	GO:0009637 [Name: response to blue light]; GO:0048511 [Name: rhythmic process]; GO:0018298 [Name: protein-chromophore linkage]; GO:0016567 [Name: protein ubiquitination]; GO:0009908 [Name: flower development]; GO:0006355 [Name: regulation of transcription DNA-templated]; GO:0007623 [Name: circadian rhythm]; GO:2001007 [Name: negative regulation of cellulose biosynthetic process]; GO:0010468 [Name…	GO:0005829 [Name: cytosol]; GO:0019005 [Name: SCF ubiquitin ligase complex]; GO:0005634 [Name: nucleus]	GO:0009881 [Name: photoreceptor activity]	ath04712 [Pathway Title: Circadian rhythm - plant]
AT4G24960.1	4	12827937	12829243	+	HVA22D	HVA22 homologue D	641	111	524	2775	3913	1690	1148.13	3.627	1.859	11.153	6.91757e-29	2.03256e-25	0.0187	0.0166	0.018	0.018	TRUE	0.0785	GO:0009555 [Name: pollen development]; GO:0009908 [Name: flower development]; GO:0009414 [Name: response to water deprivation]; GO:0010507 [Name: negative regulation of autophagy]; GO:0042538 [Name: hyperosmotic salinity response]; GO:0009737 [Name: response to abscisic acid]; GO:0009409 [Name: response to cold]	GO:0016021 [Name: integral component of membrane]	GO:0003674 [Name: molecular_function]	-
AT3G25770.1	3	9406873	9407955	+	AOC2	allene oxide cyclase 2	57	11	58	314	401	124	113.46	3.598	1.847	4.812	1.49633e-06	0.000113958	0.0865	0.0892	0.0874	0.0874	TRUE	0.1086	GO:0009695 [Name: jasmonic acid biosynthetic process]; GO:0009409 [Name: response to cold]	GO:0009535 [Name: chloroplast thylakoid membrane]; GO:0005829 [Name: cytosol]; GO:0009941 [Name: chloroplast envelope]; GO:0010319 [Name: stromule]; GO:0009507 [Name: chloroplast]; GO:0009570 [Name: chloroplast stroma]	GO:0046423 [Name: allene-oxide cyclase activity]	ath01100 [Pathway Title: Metabolic pathways]; ath00592 [Pathway Title: alpha-Linolenic acid metabolism]; ath01110 [Pathway Title: Biosynthesis of secondary metabolites]
AT5G52310.1	5	21240849	21243613	+	LTI78	low-temperature-responsive protein 78 (LTI78) / desiccation-responsive protein 29A (RD29A)	1659	322	917	5607	9302	4973	2745.9	3.595	1.846	9.689	3.36992e-22	5.6581e-19	0.032	0.012	0.0253	0.0253	TRUE	0.8174	GO:0009737 [Name: response to abscisic acid]; GO:0007623 [Name: circadian rhythm]; GO:0042538 [Name: hyperosmotic salinity response]; GO:0010150 [Name: leaf senescence]; GO:0000302 [Name: response to reactive oxygen species]; GO:0009611 [Name: response to wounding]; GO:0006970 [Name: response to osmotic stress]; GO:0009409 [Name: response to cold]; GO:0009609 [Name: response to symbiotic bacteriu…	GO:0005829 [Name: cytosol]; GO:0005737 [Name: cytoplasm]; GO:0009536 [Name: plastid]	GO:0003674 [Name: molecular_function]	-
AT1G10590.2	1	3502009	3503437	-	AT1G10590	Nucleic acid-binding OB-fold-like protein	18	3	9	68	102	31	27	3.58	1.84	3.224	0.00126383	0.0261741	0.0747	0.3469	0.1628	0.1628	TRUE	0.675	GO:0008150 [Name: biological_process]	GO:0005829 [Name: cytosol]; GO:0005576 [Name: extracellular region]; GO:0005886 [Name: plasma membrane]	GO:0003729 [Name: mRNA binding]	ath03030 [Pathway Title: DNA replication]; ath03430 [Pathway Title: Mismatch repair]; ath03440 [Pathway Title: Homologous recombination]; ath03420 [Pathway Title: Nucleotide excision repair]
AT2G30500.2	2	12998159	13000464	-	NET4B	Kinase interacting (KIP1-like) family protein	67	19	45	375	457	130	131.41	3.568	1.835	4.207	2.58825e-05	0.00119763	0.1475	0.0782	0.1199	0.1199	TRUE	0.0992	GO:0031347 [Name: regulation of defense response]; GO:2000241 [Name: regulation of reproductive process]; GO:0042742 [Name: defense response to bacterium]; GO:0009888 [Name: tissue development]; GO:0050832 [Name: defense response to fungus]; GO:0048573 [Name: photoperiodism flowering]; GO:1901565 [Name: organonitrogen compound catabolic process]; GO:0009408 [Name: response to heat]; GO:0010243 [N…	GO:0005774 [Name: vacuolar membrane]	GO:0003779 [Name: actin binding]	-
AT1G73480.1	1	27628939	27632806	+	AT1G73480	alpha/beta-Hydrolases superfamily protein	200	14	166	721	1050	427	296.68	3.557	1.831	5.614	1.97559e-08	2.68429e-06	0.1	0.0395	0.069	0.069	TRUE	0.462	GO:0009409 [Name: response to cold]; GO:0009737 [Name: response to abscisic acid]; GO:0009408 [Name: response to heat]; GO:0031326 [Name: regulation of cellular biosynthetic process]; GO:0009753 [Name: response to jasmonic acid]; GO:0019760 [Name: glucosinolate metabolic process]; GO:0006970 [Name: response to osmotic stress]; GO:0009414 [Name: response to water deprivation]; GO:1901701 [Name: ce…	GO:0016021 [Name: integral component of membrane]; GO:0016020 [Name: membrane]; GO:0009507 [Name: chloroplast]	GO:0047372 [Name: acylglycerol lipase activity]; GO:0016298 [Name: lipase activity]	-
AT4G28140.1	4	13974691	13975908	-	ERF054	Integrase-type DNA-binding superfamily protein	219	92	218	1309	2054	842	576.47	3.545	1.826	5.901	3.61754e-09	5.74553e-07	0.1006	0.0245	0.0648	0.0648	TRUE	1.8261	GO:0009873 [Name: ethylene-activated signaling pathway]; GO:0009408 [Name: response to heat]	GO:0005634 [Name: nucleus]	GO:0003700 [Name: transcription factor activity sequence-specific DNA binding]; GO:0000976 [Name: transcription regulatory region sequence-specific DNA binding]; GO:0043565 [Name: sequence-specific DNA binding]; GO:0003677 [Name: DNA binding]	-
AT2G21130.1	2	9055398	9056232	-	CYP19-2	Cyclophilin-like peptidyl-prolyl cis-trans isomerase family protein	31	2	16	70	187	55	39.34	3.543	1.825	3.434	0.000593804	0.0147081	0.1038	0.2408	0.1537	0.1537	TRUE	1.1158	GO:0000413 [Name: protein peptidyl-prolyl isomerization]; GO:0006457 [Name: protein folding]	GO:0005737 [Name: cytoplasm]; GO:0005739 [Name: mitochondrion]; GO:0005829 [Name: cytosol]; GO:0005886 [Name: plasma membrane]	GO:0003755 [Name: peptidyl-prolyl cis-trans isomerase activity]; GO:0016018 [Name: cyclosporin A binding]	-
AT2G04570.1	2	1594673	1596349	+	AT2G04570	GDSL-like Lipase/Acylhydrolase superfamily protein	70	3	63	204	436	155	103.14	3.504	1.809	4.242	2.2197e-05	0.00106049	0.1272	0.0972	0.1107	0.1107	TRUE	0.6252	GO:0016042 [Name: lipid catabolic process]	GO:0005576 [Name: extracellular region]	GO:0016297 [Name: acyl-[acyl-carrier-protein] hydrolase activity]; GO:0016788 [Name: hydrolase activity acting on ester bonds]	-
AT2G32680.1	2	13859769	13862614	-	AtRLP23	receptor like protein 23	22	3	28	114	162	55	44.32	3.474	1.797	3.809	0.000139781	0.00465395	0.0654	0.2147	0.117	0.117	TRUE	0.2169	GO:0042742 [Name: defense response to bacterium]; GO:0002758 [Name: innate immune response-activating signal transduction]; GO:0002238 [Name: response to molecule of fungal origin]; GO:0002229 [Name: defense response to oomycetes]; GO:0032491 [Name: detection of molecule of fungal origin]; GO:0050832 [Name: defense response to fungus]; GO:0010555 [Name: response to mannitol]; GO:0002237 [Name: re…	GO:0005783 [Name: endoplasmic reticulum]; GO:0005886 [Name: plasma membrane]; GO:0016021 [Name: integral component of membrane]	GO:0019901 [Name: protein kinase binding]	-
AT5G40390.1	5	16161515	16165357	+	RFS5	Raffinose synthase family protein	146	21	162	701	958	354	273.7	3.469	1.794	6.224	4.84352e-10	9.64846e-08	0.0564	0.0421	0.052	0.052	TRUE	0.1055	GO:0005975 [Name: carbohydrate metabolic process]; GO:0006979 [Name: response to oxidative stress]; GO:0009414 [Name: response to water deprivation]	GO:0009507 [Name: chloroplast]	GO:0047274 [Name: galactinol-sucrose galactosyltransferase activity]	ath00052 [Pathway Title: Galactose metabolism]
AT4G15910.1	4	9028461	9029423	+	ATDI21	drought-induced 21	49	4	35	201	245	69	69.53	3.453	1.788	3.603	0.000315117	0.00886157	0.153	0.14	0.1478	0.1478	TRUE	0.1003	GO:0009737 [Name: response to abscisic acid]; GO:0009409 [Name: response to cold]; GO:0009631 [Name: cold acclimation]; GO:0009414 [Name: response to water deprivation]	GO:0005739 [Name: mitochondrion]	GO:0003674 [Name: molecular_function]	-
AT2G05540.1	2	2033156	2034217	+	AT2G05540	Glycine-rich protein family	42	3	19	96	169	103	50.94	3.434	1.78	4.035	5.45327e-05	0.00219871	0.042	0.188	0.1029	0.1029	TRUE	1.5553	GO:0098542 [Name: defense response to other organism]; GO:0009416 [Name: response to light stimulus]; GO:0019752 [Name: carboxylic acid metabolic process]; GO:0009266 [Name: response to temperature stimulus]	GO:0005576 [Name: extracellular region]	-	-
AT2G37180.1	2	15617708	15619155	+	PIP2-3	Aquaporin-like superfamily protein	461	150	425	2166	3390	1745	1025.91	3.417	1.773	8.2	2.4047e-16	1.5277e-13	0.0428	0.0176	0.0314	0.0314	TRUE	1.0145	GO:0009414 [Name: response to water deprivation]	GO:0016021 [Name: integral component of membrane]; GO:0005783 [Name: endoplasmic reticulum]; GO:0005886 [Name: plasma membrane]	GO:0015250 [Name: water channel activity]; GO:0015267 [Name: channel activity]	-
AT2G39350.1	2	16430085	16432557	-	ABCG1	ABC-2 type transporter family protein	36	8	33	112	337	84	67.91	3.388	1.76	4.037	5.40946e-05	0.00219111	0.0908	0.1432	0.1075	0.1075	TRUE	1.4505	GO:0010208 [Name: pollen wall assembly]; GO:0009624 [Name: response to nematode]	GO:0016021 [Name: integral component of membrane]	GO:0005524 [Name: ATP binding]	-
AT1G54050.1	1	20179422	20180281	-	HSP17.4B	HSP20-like chaperones superfamily protein	22	2	17	88	113	36	32.23	3.317	1.73	3.164	0.0015562	0.030611	0.0905	0.292	0.1578	0.1578	TRUE	0.1083	GO:0071456 [Name: cellular response to hypoxia]; GO:0009651 [Name: response to salt stress]; GO:0051259 [Name: protein oligomerization]; GO:0042542 [Name: response to hydrogen peroxide]; GO:0006457 [Name: protein folding]; GO:0009408 [Name: response to heat]	GO:0005737 [Name: cytoplasm]	GO:0043621 [Name: protein self-association]; GO:0051082 [Name: unfolded protein binding]	ath04141 [Pathway Title: Protein processing in endoplasmic reticulum]
AT1G02390.1	1	480852	483292	+	GPAT2	glycerol-3-phosphate acyltransferase 2	17	3	9	63	87	29	24.75	3.306	1.725	3.011	0.0026052	0.0452943	0	0.3777	0.1622	0.1622	TRUE	0.173	GO:0016024 [Name: CDP-diacylglycerol biosynthetic process]; GO:0010143 [Name: cutin biosynthetic process]	GO:0016021 [Name: integral component of membrane]; GO:0016020 [Name: membrane]	GO:0016791 [Name: phosphatase activity]; GO:0004366 [Name: glycerol-3-phosphate O-acyltransferase activity]; GO:0090447 [Name: glycerol-3-phosphate 2-O-acyltransferase activity]; GO:0016747 [Name: transferase activity transferring acyl groups other than amino-acyl groups]	ath00564 [Pathway Title: Glycerophospholipid metabolism]; ath00561 [Pathway Title: Glycerolipid metabolism]; ath01100 [Pathway Title: Metabolic pathways]; ath01110 [Pathway Title: Biosynthesis of secondary metabolites]
AT3G29575.3	3	11382231	11383964	-	AFP3	ABI five binding protein 3	58	24	62	234	544	228	139.42	3.258	1.704	4.964	6.88983e-07	5.91067e-05	0.0673	0.0742	0.0702	0.0702	TRUE	0.7479	GO:0009737 [Name: response to abscisic acid]; GO:0007165 [Name: signal transduction]; GO:0045892 [Name: negative regulation of transcription DNA-templated]	GO:0005634 [Name: nucleus]	GO:0005515 [Name: protein binding]	-
AT2G01610.1	2	273917	274820	-	AT2G01610	Plant invertase/pectin methylesterase inhibitor superfamily protein	162	40	122	460	760	721	291.26	3.257	1.704	5.465	4.62907e-08	5.52069e-06	0.0774	0.04	0.0626	0.0626	TRUE	1.5394	GO:0043086 [Name: negative regulation of catalytic activity]	GO:0005576 [Name: extracellular region]	GO:0004857 [Name: enzyme inhibitor activity]	-
AT5G24470.1	5	8355951	8358873	-	APRR5	two-component response regulator-like protein	50	4	31	135	253	99	65.28	3.254	1.702	4.516	6.31225e-06	0.000375635	0.0283	0.1486	0.0744	0.0744	TRUE	0.6032	GO:0000160 [Name: phosphorelay signal transduction system]; GO:0048511 [Name: rhythmic process]	GO:0005634 [Name: nucleus]	GO:0003677 [Name: DNA binding]; GO:0000156 [Name: phosphorelay response regulator activity]; GO:0005515 [Name: protein binding]	ath04712 [Pathway Title: Circadian rhythm - plant]
AT2G27385.1	2	11716496	11717330	-	AT2G27385	Pollen Ole e 1 allergen and extensin family protein	94	7	45	222	487	116	107.27	3.209	1.682	3.684	0.000229363	0.00688557	0.1568	0.0938	0.1311	0.1311	TRUE	0.2064	GO:0008150 [Name: biological_process]	GO:0009507 [Name: chloroplast]	GO:0003674 [Name: molecular_function]	-
AT5G66460.1	5	26538395	26541036	-	MAN7	Glycosyl hydrolase superfamily protein	208	24	146	555	1042	532	295.46	3.206	1.681	8.465	2.56491e-17	2.15324e-14	0.0104	0.0396	0.022	0.022	TRUE	0.3904	GO:0010047 [Name: fruit dehiscence]; GO:0009828 [Name: plant-type cell wall loosening]; GO:1990059 [Name: fruit valve development]; GO:0071704 [Name: organic substance metabolic process]; GO:0009845 [Name: seed germination]	GO:0071944 [Name: cell periphery]; GO:0005576 [Name: extracellular region]	GO:0016985 [Name: mannan endo-14-beta-mannosidase activity]	ath00051 [Pathway Title: Fructose and mannose metabolism]
AT5G24780.1	5	8507590	8508957	-	VSP1	vegetative storage protein 1	260	83	478	1264	3630	661	704.1	3.166	1.663	4.124	3.71791e-05	0.00160926	0.1918	0.0217	0.1139	0.1139	TRUE	0.1793	GO:0009753 [Name: response to jasmonic acid]; GO:0006952 [Name: defense response]	GO:0000325 [Name: plant-type vacuole]	GO:0045735 [Name: nutrient reservoir activity]; GO:0003993 [Name: acid phosphatase activity]	-
AT1G69260.1	1	26039048	26040720	+	AFP1	ABI five binding protein	89	9	56	223	488	159	115.94	3.126	1.644	4.864	1.1511e-06	9.07976e-05	0.055	0.0875	0.066	0.066	TRUE	0.2141	GO:0009737 [Name: response to abscisic acid]; GO:0045892 [Name: negative regulation of transcription DNA-templated]; GO:0009738 [Name: abscisic acid-activated signaling pathway]	GO:0005634 [Name: nucleus]	-	-
AT2G33380.1	2	14144831	14146471	-	PXG3	Caleosin-related family protein	849	200	710	3018	5819	2130	1509.2	3.124	1.644	9.19	3.92151e-20	5.12105e-17	0.0266	0.0147	0.0216	0.0216	TRUE	0.1217	GO:0050832 [Name: defense response to fungus]; GO:0009269 [Name: response to desiccation]; GO:0009409 [Name: response to cold]; GO:0009651 [Name: response to salt stress]; GO:1902609 [Name: (R)-2-hydroxy-alpha-linolenic acid biosynthetic process]; GO:2000377 [Name: regulation of reactive oxygen species metabolic process]; GO:0010118 [Name: stomatal movement]; GO:0031407 [Name: oxylipin metabolic …	GO:0005783 [Name: endoplasmic reticulum]; GO:0012511 [Name: monolayer-surrounded lipid storage body]; GO:0031969 [Name: chloroplast membrane]; GO:0000325 [Name: plant-type vacuole]; GO:0043231 [Name: intracellular membrane-bounded organelle]	GO:0102070 [Name: 18-hydroxyoleate peroxygenase activity]; GO:0004497 [Name: monooxygenase activity]; GO:1990137 [Name: plant seed peroxidase activity]; GO:0005509 [Name: calcium ion binding]	ath00073 [Pathway Title: Cutin suberine and wax biosynthesis]
AT4G34650.1	4	16542377	16545121	+	SQS2	squalene synthase 2	17	1	20	68	89	42	27.68	3.101	1.633	3.019	0.00253202	0.0444119	0.0252	0.3387	0.1482	0.1482	TRUE	0.5827	GO:0045338 [Name: farnesyl diphosphate metabolic process]; GO:0016126 [Name: sterol biosynthetic process]	GO:0005789 [Name: endoplasmic reticulum membrane]; GO:0016021 [Name: integral component of membrane]	GO:0004310 [Name: farnesyl-diphosphate farnesyltransferase activity]	ath01110 [Pathway Title: Biosynthesis of secondary metabolites]; ath01130 [Pathway Title: Biosynthesis of antibiotics]; ath00100 [Pathway Title: Steroid biosynthesis]; ath01100 [Pathway Title: Metabolic pathways]; ath00909 [Pathway Title: Sesquiterpenoid and triterpenoid biosynthesis]
AT3G56275.1	3	20872831	20873472	+	AT3G56275		175	17	114	553	897	200	222.38	3.089	1.627	3.996	6.42989e-05	0.00248587	0.1551	0.0498	0.11	0.11	TRUE	1.9879	-	-	-	-
AT4G34710.2	4	16560062	16562931	-	SPE2	arginine decarboxylase 2	50	9	24	146	284	74	67.99	3.081	1.623	3.621	0.000293254	0.00836556	0.1022	0.143	0.1165	0.1165	TRUE	0.3757	GO:0009611 [Name: response to wounding]; GO:0033388 [Name: putrescine biosynthetic process from arginine]; GO:0009737 [Name: response to abscisic acid]; GO:0009753 [Name: response to jasmonic acid]; GO:0006970 [Name: response to osmotic stress]; GO:0006527 [Name: arginine catabolic process]; GO:0009446 [Name: putrescine biosynthetic process]; GO:0009409 [Name: response to cold]; GO:0006979 [Name:…	GO:0009507 [Name: chloroplast]; GO:0005829 [Name: cytosol]	GO:0008792 [Name: arginine decarboxylase activity]; GO:0042803 [Name: protein homodimerization activity]	ath01100 [Pathway Title: Metabolic pathways]; ath00330 [Pathway Title: Arginine and proline metabolism]
AT1G17940.1	1	6169341	6173222	-	AT1G17940	Endosomal targeting BRO1-like domain-containing protein	140	25	145	550	877	317	242.54	3.047	1.607	6.489	8.62685e-11	2.15295e-08	0.0312	0.0463	0.0363	0.0363	TRUE	0.5229	GO:0009651 [Name: response to salt stress]; GO:0009059 [Name: macromolecule biosynthetic process]; GO:0033014 [Name: tetrapyrrole biosynthetic process]; GO:0009737 [Name: response to abscisic acid]; GO:0042546 [Name: cell wall biogenesis]; GO:0071669 [Name: plant-type cell wall organization or biogenesis]; GO:0007165 [Name: signal transduction]; GO:0009414 [Name: response to water deprivation]; G…	GO:0005634 [Name: nucleus]	GO:0003674 [Name: molecular_function]	-
AT3G04720.1	3	1285524	1286562	-	HEL	pathogenesis-related 4	33	2	17	59	164	57	36.89	3.046	1.607	3.051	0.00228444	0.0409838	0.0914	0.2563	0.1517	0.1517	TRUE	1.0568	GO:0009723 [Name: response to ethylene]; GO:0042742 [Name: defense response to bacterium]; GO:0031640 [Name: killing of cells of other organism]; GO:0080027 [Name: response to herbivore]; GO:0009615 [Name: response to virus]; GO:0050832 [Name: defense response to fungus]; GO:0009627 [Name: systemic acquired resistance]	GO:0005773 [Name: vacuole]; GO:0099503 [Name: secretory vesicle]	GO:0008061 [Name: chitin binding]; GO:0004540 [Name: ribonuclease activity]	-
AT2G39800.2	2	16598167	16603059	-	P5CSA	delta1-pyrroline-5-carboxylate synthase 1	668	60	513	1908	3584	956	867.65	3.038	1.603	5.044	4.56123e-07	4.27157e-05	0.1171	0.0192	0.0702	0.0702	TRUE	0.6106	GO:0055129 [Name: L-proline biosynthetic process]	GO:0005739 [Name: mitochondrion]; GO:0005737 [Name: cytoplasm]; GO:0005794 [Name: Golgi apparatus]; GO:0009507 [Name: chloroplast]	GO:0005524 [Name: ATP binding]; GO:0004350 [Name: glutamate-5-semialdehyde dehydrogenase activity]; GO:0004349 [Name: glutamate 5-kinase activity]	ath01110 [Pathway Title: Biosynthesis of secondary metabolites]; ath01230 [Pathway Title: Biosynthesis of amino acids]; ath00330 [Pathway Title: Arginine and proline metabolism]; ath01100 [Pathway Title: Metabolic pathways]
AT2G02100.1	2	528350	529108	+	PDF2.2	low-molecular-weight cysteine-rich 69	52	15	34	164	373	105	88.02	3.03	1.599	3.973	7.10181e-05	0.0026925	0.0851	0.1124	0.095	0.095	TRUE	0.1199	GO:0050832 [Name: defense response to fungus]; GO:0006952 [Name: defense response]; GO:0031640 [Name: killing of cells of other organism]	GO:0009505 [Name: plant-type cell wall]; GO:0005886 [Name: plasma membrane]; GO:0005576 [Name: extracellular region]; GO:0005739 [Name: mitochondrion]	GO:0005515 [Name: protein binding]	-
AT2G21590.1	2	9238482	9242440	+	APL4	Glucose-1-phosphate adenylyltransferase family protein	48	9	67	222	376	101	95	3.008	1.589	3.881	0.000103964	0.00371961	0.098	0.1048	0.1005	0.1005	TRUE	1.1882	GO:0019252 [Name: starch biosynthetic process]; GO:0005978 [Name: glycogen biosynthetic process]	GO:0009507 [Name: chloroplast]; GO:0010170 [Name: glucose-1-phosphate adenylyltransferase complex]	GO:0005524 [Name: ATP binding]; GO:0008878 [Name: glucose-1-phosphate adenylyltransferase activity]	ath00500 [Pathway Title: Starch and sucrose metabolism]; ath01100 [Pathway Title: Metabolic pathways]; ath00520 [Pathway Title: Amino sugar and nucleotide sugar metabolism]; ath01110 [Pathway Title: Biosynthesis of secondary metabolites]
AT1G61340.1	1	22628265	22630009	+	AT1G61340	F-box family protein	377	51	266	1172	1652	782	518.6	2.969	1.57	8.372	5.65001e-17	4.28416e-14	0.0193	0.0263	0.0216	0.0216	TRUE	0.2614	GO:0009651 [Name: response to salt stress]; GO:0071456 [Name: cellular response to hypoxia]; GO:0009961 [Name: response to 1-aminocyclopropane-1-carboxylic acid]; GO:0009753 [Name: response to jasmonic acid]; GO:0009611 [Name: response to wounding]; GO:0009737 [Name: response to abscisic acid]; GO:0009751 [Name: response to salicylic acid]; GO:0009617 [Name: response to bacterium]; GO:0006970 [Na…	GO:0005739 [Name: mitochondrion]	GO:0005515 [Name: protein binding]	-
AT4G34710.1	4	16560062	16562969	-	SPE2	arginine decarboxylase 2	740	99	724	2622	3481	1757	1138.12	2.964	1.568	8.297	1.06343e-16	7.14198e-14	0.0318	0.0167	0.0239	0.0239	TRUE	0.3469	GO:0009611 [Name: response to wounding]; GO:0033388 [Name: putrescine biosynthetic process from arginine]; GO:0009737 [Name: response to abscisic acid]; GO:0009753 [Name: response to jasmonic acid]; GO:0006970 [Name: response to osmotic stress]; GO:0006527 [Name: arginine catabolic process]; GO:0009446 [Name: putrescine biosynthetic process]; GO:0009409 [Name: response to cold]; GO:0006979 [Name:…	GO:0009507 [Name: chloroplast]; GO:0005829 [Name: cytosol]	GO:0008792 [Name: arginine decarboxylase activity]; GO:0042803 [Name: protein homodimerization activity]	ath01100 [Pathway Title: Metabolic pathways]; ath00330 [Pathway Title: Arginine and proline metabolism]
AT4G15210.1	4	8666338	8669470	-	BAM5	beta-amylase 5	125	82	197	796	1555	606	415.3	2.96	1.566	3.873	0.000107384	0.00381872	0.1983	0.0307	0.1125	0.1125	TRUE	1.7126	GO:0005983 [Name: starch catabolic process]; GO:0080027 [Name: response to herbivore]; GO:0000272 [Name: polysaccharide catabolic process]	GO:0099503 [Name: secretory vesicle]	GO:0016161 [Name: beta-amylase activity]	-
AT1G72060.1	1	27118447	27119011	+	AT1G72060	serine-type endopeptidase inhibitor	37	8	73	233	261	114	88.87	2.941	1.556	3.414	0.000640009	0.0155736	0.1389	0.1115	0.1283	0.1283	TRUE	0.9398	GO:0006979 [Name: response to oxidative stress]	GO:0016021 [Name: integral component of membrane]	GO:0004867 [Name: serine-type endopeptidase inhibitor activity]	-
AT2G23170.1	2	9863855	9866562	-	GH3.3	Auxin-responsive GH3 family protein	52	10	31	99	312	125	73.63	2.939	1.555	3.899	9.65842e-05	0.00348741	0.0687	0.1327	0.0897	0.0897	TRUE	0.0881	GO:0010252 [Name: auxin homeostasis]	GO:0005737 [Name: cytoplasm]	GO:0016881 [Name: acid-amino acid ligase activity]; GO:0010279 [Name: indole-3-acetic acid amido synthetase activity]	ath04075 [Pathway Title: Plant hormone signal transduction]
AT2G39800.4	2	16598072	16603061	-	P5CSA	delta1-pyrroline-5-carboxylate synthase 1	1439	203	1030	3565	7350	3138	1970.67	2.913	1.542	10.5	8.59743e-26	2.02091e-22	0.0158	0.0133	0.0145	0.0145	TRUE	0.2264	GO:0042538 [Name: hyperosmotic salinity response]; GO:0006979 [Name: response to oxidative stress]; GO:0055129 [Name: L-proline biosynthetic process]; GO:0009555 [Name: pollen development]; GO:0009651 [Name: response to salt stress]; GO:0006561 [Name: proline biosynthetic process]; GO:0009414 [Name: response to water deprivation]; GO:0048364 [Name: root development]	GO:0009507 [Name: chloroplast]; GO:0005737 [Name: cytoplasm]; GO:0005794 [Name: Golgi apparatus]	GO:0017084 [Name: delta1-pyrroline-5-carboxylate synthetase activity]; GO:0004349 [Name: glutamate 5-kinase activity]; GO:0005524 [Name: ATP binding]; GO:0004350 [Name: glutamate-5-semialdehyde dehydrogenase activity]	ath00330 [Pathway Title: Arginine and proline metabolism]; ath01100 [Pathway Title: Metabolic pathways]; ath01110 [Pathway Title: Biosynthesis of secondary metabolites]; ath01230 [Pathway Title: Biosynthesis of amino acids]
AT5G14840.1	5	4798329	4800738	-	AT5G14840		26	4	18	79	108	61	36.36	2.907	1.54	3.754	0.000173796	0.00547167	0	0.2599	0.0761	0.0761	TRUE	0.1164	-	-	-	-
AT3G25180.2	3	9167284	9169279	-	CYP82G1	cytochrome P450 family 82 subfamily G polypeptide 1	37	14	50	240	200	120	86.25	2.899	1.535	3.494	0.000475844	0.0123049	0.116	0.1146	0.1168	0.1168	TRUE	1.3366	GO:0098542 [Name: defense response to other organism]; GO:0009617 [Name: response to bacterium]; GO:0046246 [Name: terpene biosynthetic process]; GO:0002213 [Name: defense response to insect]; GO:0016114 [Name: terpenoid biosynthetic process]; GO:1901045 [Name: negative regulation of oviposition]; GO:0050832 [Name: defense response to fungus]	GO:0016021 [Name: integral component of membrane]	GO:0020037 [Name: heme binding]; GO:0097008 [Name: (3E)-48-dimethyl-137-nonatriene synthase activity]; GO:0097007 [Name: 4812-trimethyltrideca-13711-tetraene synthase activity]; GO:0005506 [Name: iron ion binding]; GO:0102171 [Name: DMNT synthase activity]	ath00904 [Pathway Title: Diterpenoid biosynthesis]
AT5G20950.2	5	7107376	7111311	-	AT5G20950	Glycosyl hydrolase family protein	57	5	72	238	271	122	91.14	2.865	1.518	3.58	0.000343193	0.00945731	0.1094	0.1089	0.1092	0.1092	TRUE	0.6395	GO:0009969 [Name: xyloglucan biosynthetic process]	GO:0048046 [Name: apoplast]; GO:0009505 [Name: plant-type cell wall]; GO:0009506 [Name: plasmodesma]; GO:0009536 [Name: plastid]	GO:0008422 [Name: beta-glucosidase activity]	ath00940 [Pathway Title: Phenylpropanoid biosynthesis]; ath00460 [Pathway Title: Cyanoamino acid metabolism]; ath01100 [Pathway Title: Metabolic pathways]; ath00500 [Pathway Title: Starch and sucrose metabolism]; ath01110 [Pathway Title: Biosynthesis of secondary metabolites]
AT2G42530.1	2	17709036	17709945	-	COR15B	cold regulated 15b	304	74	229	1069	1519	733	489.69	2.862	1.517	7.811	5.68711e-15	2.72819e-12	0.0208	0.0273	0.0233	0.0233	TRUE	0.2655	GO:0009631 [Name: cold acclimation]; GO:0009737 [Name: response to abscisic acid]; GO:0050832 [Name: defense response to fungus]; GO:0010150 [Name: leaf senescence]; GO:0009409 [Name: response to cold]	GO:0009570 [Name: chloroplast stroma]; GO:0005829 [Name: cytosol]; GO:0019898 [Name: extrinsic component of membrane]; GO:0009507 [Name: chloroplast]; GO:0009941 [Name: chloroplast envelope]	GO:0005534 [Name: galactose binding]; GO:0008289 [Name: lipid binding]	-
AT1G05100.1	1	1469610	1470881	+	MAPKKK18	mitogen-activated protein kinase kinase kinase 18	58	11	41	189	295	106	84.19	2.854	1.513	4.551	5.34228e-06	0.000333092	0.0322	0.1172	0.0589	0.0589	TRUE	0.5063	GO:0007165 [Name: signal transduction]; GO:1900057 [Name: positive regulation of leaf senescence]; GO:0006970 [Name: response to osmotic stress]; GO:0009738 [Name: abscisic acid-activated signaling pathway]; GO:0046777 [Name: protein autophosphorylation]; GO:0009737 [Name: response to abscisic acid]; GO:1902457 [Name: negative regulation of stomatal opening]; GO:0009789 [Name: positive regulation…	GO:0005634 [Name: nucleus]	GO:0005524 [Name: ATP binding]; GO:0004712 [Name: protein serine/threonine/tyrosine kinase activity]; GO:0004672 [Name: protein kinase activity]; GO:0004709 [Name: MAP kinase kinase kinase activity]; GO:0004674 [Name: protein serine/threonine kinase activity]; GO:0019901 [Name: protein kinase binding]	-
AT3G24420.1	3	8862840	8864914	-	AT3G24420	alpha/beta-Hydrolases superfamily protein	112	24	82	331	585	256	169.34	2.846	1.509	6.836	8.15089e-12	2.75758e-09	0.0065	0.0626	0.025	0.025	TRUE	0.1718	GO:0006631 [Name: fatty acid metabolic process]; GO:0010035 [Name: response to inorganic substance]; GO:0009737 [Name: response to abscisic acid]; GO:1901701 [Name: cellular response to oxygen-containing compound]; GO:0001666 [Name: response to hypoxia]; GO:0006355 [Name: regulation of transcription DNA-templated]; GO:0009753 [Name: response to jasmonic acid]; GO:0009642 [Name: response to light …	GO:0005634 [Name: nucleus]; GO:0005737 [Name: cytoplasm]	GO:0016787 [Name: hydrolase activity]	-
AT1G02310.1	1	458133	460696	-	MAN1	Glycosyl hydrolase superfamily protein	21	2	29	82	121	53	36.16	2.841	1.506	3.127	0.0017673	0.0338566	0.0273	0.2612	0.121	0.121	TRUE	0.6892	GO:0071704 [Name: organic substance metabolic process]	GO:0005576 [Name: extracellular region]	GO:0016985 [Name: mannan endo-14-beta-mannosidase activity]	ath00051 [Pathway Title: Fructose and mannose metabolism]
AT3G55500.1	3	20574831	20576182	-	EXPA16	expansin A16	99	16	54	278	321	233	127.17	2.831	1.501	4.85	1.23278e-06	9.63201e-05	0.0414	0.0805	0.0549	0.0549	TRUE	0.541	GO:0009664 [Name: plant-type cell wall organization]; GO:0006949 [Name: syncytium formation]	GO:0016020 [Name: membrane]; GO:0005576 [Name: extracellular region]	-	-
AT4G31290.1	4	15185886	15188484	+	AT4G31290	ChaC-like family protein	117	22	104	409	677	212	182.53	2.824	1.498	5.21	1.89244e-07	1.95104e-05	0.0447	0.0587	0.0494	0.0494	TRUE	0.843	GO:0006751 [Name: glutathione catabolic process]	GO:0005737 [Name: cytoplasm]	GO:0003839 [Name: gamma-glutamylcyclotransferase activity]	-
AT3G23250.1	3	8309209	8310826	+	MYB15	myb domain protein 15	106	7	93	321	420	199	135.66	2.821	1.496	4.174	2.98874e-05	0.00134994	0.0818	0.076	0.0789	0.0789	TRUE	0.7121	GO:0009409 [Name: response to cold]; GO:0009414 [Name: response to water deprivation]; GO:0009651 [Name: response to salt stress]	GO:0005634 [Name: nucleus]	GO:0003700 [Name: transcription factor activity sequence-specific DNA binding]; GO:0003677 [Name: DNA binding]	-
AT1G02930.1	1	661177	662427	-	GSTF6	glutathione S-transferase 6	112	32	142	684	791	142	228.85	2.82	1.496	3.05	0.00228579	0.0409838	0.255	0.0486	0.1643	0.1643	TRUE	0.1442	GO:0006952 [Name: defense response]; GO:0006979 [Name: response to oxidative stress]; GO:0009407 [Name: toxin catabolic process]; GO:0006749 [Name: glutathione metabolic process]; GO:0009414 [Name: response to water deprivation]; GO:0046686 [Name: response to cadmium ion]	GO:0005829 [Name: cytosol]; GO:0009506 [Name: plasmodesma]; GO:0005737 [Name: cytoplasm]; GO:0000325 [Name: plant-type vacuole]; GO:0005739 [Name: mitochondrion]; GO:0005576 [Name: extracellular region]; GO:0009505 [Name: plant-type cell wall]	GO:0043295 [Name: glutathione binding]; GO:0004364 [Name: glutathione transferase activity]; GO:0050897 [Name: cobalt ion binding]; GO:2001227 [Name: quercitrin binding]; GO:2001147 [Name: camalexin binding]; GO:0005507 [Name: copper ion binding]	ath00480 [Pathway Title: Glutathione metabolism]
AT2G46640.2	2	19148730	19150995	+	AT2G46640	NAD-dependent protein deacetylase HST1-like protein	20	3	15	69	75	43	27.98	2.819	1.495	3.048	0.00230013	0.0412094	0	0.3351	0.1149	0.1149	TRUE	0.4808	GO:0001763 [Name: morphogenesis of a branching structure]	GO:0005634 [Name: nucleus]	GO:0003674 [Name: molecular_function]	-
AT4G01950.1	4	844409	846787	-	GPAT3	glycerol-3-phosphate acyltransferase 3	79	6	74	308	304	109	104.73	2.815	1.493	3.164	0.00155492	0.030611	0.1764	0.0959	0.1422	0.1422	TRUE	0.273	GO:0010143 [Name: cutin biosynthetic process]; GO:0016024 [Name: CDP-diacylglycerol biosynthetic process]	GO:0016021 [Name: integral component of membrane]; GO:0016020 [Name: membrane]	GO:0016747 [Name: transferase activity transferring acyl groups other than amino-acyl groups]; GO:0016791 [Name: phosphatase activity]; GO:0004366 [Name: glycerol-3-phosphate O-acyltransferase activity]; GO:0090447 [Name: glycerol-3-phosphate 2-O-acyltransferase activity]	ath00561 [Pathway Title: Glycerolipid metabolism]; ath01100 [Pathway Title: Metabolic pathways]; ath00564 [Pathway Title: Glycerophospholipid metabolism]; ath01110 [Pathway Title: Biosynthesis of secondary metabolites]
AT1G52400.1	1	19515151	19518160	+	BGLU18	beta glucosidase 18	566	134	997	2056	6489	1145	1250.7	2.808	1.49	3.784	0.000154471	0.0049945	0.2158	0.016	0.11	0.11	TRUE	0.3167	GO:0005975 [Name: carbohydrate metabolic process]; GO:0030104 [Name: water homeostasis]; GO:0050832 [Name: defense response to fungus]; GO:0009737 [Name: response to abscisic acid]; GO:0009625 [Name: response to insect]; GO:0051258 [Name: protein polymerization]; GO:0010119 [Name: regulation of stomatal movement]; GO:0009414 [Name: response to water deprivation]; GO:0009687 [Name: abscisic acid m…	GO:0005777 [Name: peroxisome]; GO:0005783 [Name: endoplasmic reticulum]; GO:0005634 [Name: nucleus]; GO:0005788 [Name: endoplasmic reticulum lumen]; GO:0010168 [Name: ER body]; GO:0009507 [Name: chloroplast]; GO:0000325 [Name: plant-type vacuole]; GO:0009506 [Name: plasmodesma]	GO:0051993 [Name: abscisic acid glucose ester beta-glucosidase activity]; GO:0008422 [Name: beta-glucosidase activity]; GO:0042802 [Name: identical protein binding]; GO:0004553 [Name: hydrolase activity hydrolyzing O-glycosyl compounds]	ath00906 [Pathway Title: Carotenoid biosynthesis]
AT5G61020.2	5	24557201	24559879	-	ECT3	evolutionarily conserved C-terminal region 3	92	11	111	259	464	290	148.06	2.786	1.478	4.993	5.94024e-07	5.21012e-05	0.037	0.0704	0.0511	0.0511	TRUE	0.6773	GO:0061157 [Name: mRNA destabilization]	GO:0005737 [Name: cytoplasm]	GO:0003729 [Name: mRNA binding]; GO:0003723 [Name: RNA binding]	-
AT5G50360.1	5	20505180	20506338	-	AT5G50360	von willebrand factor A domain protein	50	9	30	106	336	67	66.82	2.78	1.475	3.015	0.00256605	0.044746	0.1445	0.1454	0.1447	0.1447	TRUE	0.531	GO:2000143 [Name: negative regulation of DNA-templated transcription initiation]	GO:0005634 [Name: nucleus]	GO:0003674 [Name: molecular_function]	-
AT3G05640.1	3	1640393	1643253	-	AT3G05640	Protein phosphatase 2C family protein	84	20	89	346	448	204	147.59	2.779	1.475	5.43	5.63247e-08	6.58691e-06	0.0272	0.0706	0.0412	0.0412	TRUE	0.3039	GO:0006470 [Name: protein dephosphorylation]; GO:0009414 [Name: response to water deprivation]; GO:1904526 [Name: regulation of microtubule binding]; GO:0045926 [Name: negative regulation of growth]	GO:0005634 [Name: nucleus]; GO:0005886 [Name: plasma membrane]; GO:0005829 [Name: cytosol]	GO:0004722 [Name: protein serine/threonine phosphatase activity]; GO:0046872 [Name: metal ion binding]	-
AT2G34600.1	2	14573080	14573856	+	TIFY 5B	jasmonate-zim-domain protein 7	99	17	100	478	403	144	154.29	2.731	1.449	3.342	0.000833023	0.0190785	0.1584	0.0679	0.123	0.123	TRUE	0.4779	GO:0009753 [Name: response to jasmonic acid]; GO:0031347 [Name: regulation of defense response]; GO:2000022 [Name: regulation of jasmonic acid mediated signaling pathway]; GO:0009611 [Name: response to wounding]; GO:0006952 [Name: defense response]	GO:0005634 [Name: nucleus]	GO:0005515 [Name: protein binding]	-
AT5G43500.2	5	17469947	17473591	+	ARP9	actin-related protein 9	26	4	33	96	156	51	43.05	2.629	1.394	3.104	0.00191168	0.0358341	0.0512	0.2208	0.1075	0.1075	TRUE	0.5876	GO:0006355 [Name: regulation of transcription DNA-templated]; GO:0006302 [Name: double-strand break repair]; GO:0006338 [Name: chromatin remodeling]	GO:0031011 [Name: Ino80 complex]	-	-
AT2G46680.1	2	19165403	19166949	-	ATHB-7	homeobox 7	374	58	244	910	1935	520	469.55	2.603	1.38	5.004	5.62089e-07	5.04293e-05	0.0655	0.0281	0.0507	0.0507	TRUE	0.1286	GO:0009414 [Name: response to water deprivation]; GO:0009737 [Name: response to abscisic acid]; GO:0045893 [Name: positive regulation of transcription DNA-templated]	GO:0005634 [Name: nucleus]	GO:0043565 [Name: sequence-specific DNA binding]; GO:0000981 [Name: RNA polymerase II transcription factor activity sequence-specific DNA binding]; GO:0000976 [Name: transcription regulatory region sequence-specific DNA binding]; GO:0003700 [Name: transcription factor activity sequence-specific DNA binding]	-
AT1G11210.1	1	3755677	3756998	-	AT1G11210	cotton fiber protein putative (DUF761)	190	22	137	574	691	280	229.49	2.591	1.373	4.565	4.99182e-06	0.000317129	0.0618	0.0485	0.0573	0.0573	TRUE	0.1921	GO:0006979 [Name: response to oxidative stress]	GO:0016021 [Name: integral component of membrane]	GO:0003674 [Name: molecular_function]	-
AT4G27560.1	4	13759841	13761559	-	UGT79B2	UDP-Glycosyltransferase superfamily protein	200	51	174	654	1099	418	318.96	2.587	1.371	6.098	1.07228e-09	1.96913e-07	0.0271	0.0373	0.0308	0.0308	TRUE	0.3548	GO:0046283 [Name: anthocyanin-containing compound metabolic process]	-	GO:0008194 [Name: UDP-glycosyltransferase activity]	-
AT3G54260.1	3	20085010	20086763	-	TBL36	TRICHOME BIREFRINGENCE-LIKE 36	278	53	201	672	1024	759	381.26	2.585	1.37	6.71	1.94665e-11	5.94259e-09	0.0217	0.0326	0.0254	0.0254	TRUE	0.3793	-	GO:0005794 [Name: Golgi apparatus]; GO:0016021 [Name: integral component of membrane]	GO:0016413 [Name: O-acetyltransferase activity]	-
AT5G50720.1	5	20633193	20634552	-	HVA22E	HVA22 homologue E	148	27	110	433	592	301	201.06	2.578	1.366	6.515	7.25907e-11	1.91721e-08	0.0104	0.0541	0.0235	0.0235	TRUE	0.207	GO:0042538 [Name: hyperosmotic salinity response]; GO:0009737 [Name: response to abscisic acid]; GO:0009409 [Name: response to cold]; GO:0009414 [Name: response to water deprivation]	GO:0016021 [Name: integral component of membrane]	GO:0003674 [Name: molecular_function]	-
AT3G44860.1	3	16379633	16381070	+	FAMT	farnesoic acid carboxyl-O-methyltransferase	36	11	45	139	279	68	68.74	2.567	1.36	3.11	0.0018724	0.0352384	0.0977	0.1416	0.1125	0.1125	TRUE	0.3131	GO:0002238 [Name: response to molecule of fungal origin]; GO:0009611 [Name: response to wounding]; GO:0032259 [Name: methylation]; GO:0009753 [Name: response to jasmonic acid]; GO:0080027 [Name: response to herbivore]; GO:0009751 [Name: response to salicylic acid]	GO:0009507 [Name: chloroplast]	GO:0019010 [Name: farnesoic acid O-methyltransferase activity]; GO:0046872 [Name: metal ion binding]; GO:0008757 [Name: S-adenosylmethionine-dependent methyltransferase activity]	-
AT1G80110.1	1	30135381	30136956	+	PP2B11	phloem protein 2-B11	30	9	39	125	197	67	57.38	2.555	1.353	3.331	0.000863869	0.0195439	0.0518	0.1679	0.0899	0.0899	TRUE	0.5808	GO:0016567 [Name: protein ubiquitination]	GO:0005634 [Name: nucleus]	GO:0030246 [Name: carbohydrate binding]	-
AT1G30135.1	1	10596492	10597239	+	TIFY5A	jasmonate-zim-domain protein 8	138	15	121	444	470	220	173.35	2.508	1.326	3.927	8.59037e-05	0.00316002	0.0791	0.0614	0.072	0.072	TRUE	1.1846	GO:0006952 [Name: defense response]; GO:0009611 [Name: response to wounding]; GO:2000022 [Name: regulation of jasmonic acid mediated signaling pathway]; GO:0031347 [Name: regulation of defense response]	GO:0005634 [Name: nucleus]	GO:0005515 [Name: protein binding]	-
AT3G25180.1	3	9167285	9169282	-	CYP82G1	cytochrome P450 family 82 subfamily G polypeptide 1	52	14	82	228	323	136	103.37	2.477	1.308	3.798	0.000146109	0.00479002	0.0539	0.097	0.0692	0.0692	TRUE	0.3168	GO:0098542 [Name: defense response to other organism]; GO:1901045 [Name: negative regulation of oviposition]; GO:0002213 [Name: defense response to insect]; GO:0046246 [Name: terpene biosynthetic process]; GO:0009617 [Name: response to bacterium]; GO:0050832 [Name: defense response to fungus]; GO:0016114 [Name: terpenoid biosynthetic process]	GO:0016021 [Name: integral component of membrane]	GO:0020037 [Name: heme binding]; GO:0005506 [Name: iron ion binding]; GO:0097008 [Name: (3E)-48-dimethyl-137-nonatriene synthase activity]; GO:0097007 [Name: 4812-trimethyltrideca-13711-tetraene synthase activity]; GO:0102171 [Name: DMNT synthase activity]	ath00904 [Pathway Title: Diterpenoid biosynthesis]
AT3G12580.1	3	3991261	3993792	-	MED37C	heat shock protein 70	333	49	258	1145	1373	329	418.8	2.466	1.302	3.459	0.000542667	0.0137013	0.1506	0.0305	0.0976	0.0976	TRUE	0.1377	GO:0034620 [Name: cellular response to unfolded protein]; GO:0042026 [Name: protein refolding]; GO:0009615 [Name: response to virus]; GO:0016567 [Name: protein ubiquitination]; GO:0009266 [Name: response to temperature stimulus]; GO:0009617 [Name: response to bacterium]; GO:0051085 [Name: chaperone mediated protein folding requiring cofactor]; GO:0009408 [Name: response to heat]	GO:0005737 [Name: cytoplasm]; GO:0009505 [Name: plant-type cell wall]; GO:0005829 [Name: cytosol]; GO:0005739 [Name: mitochondrion]; GO:0005794 [Name: Golgi apparatus]; GO:0005634 [Name: nucleus]; GO:0000325 [Name: plant-type vacuole]; GO:0005886 [Name: plasma membrane]	GO:0005524 [Name: ATP binding]; GO:0016887 [Name: ATPase activity]; GO:0031072 [Name: heat shock protein binding]; GO:0031625 [Name: ubiquitin protein ligase binding]; GO:0044183 [Name: protein binding involved in protein folding]; GO:0051082 [Name: unfolded protein binding]; GO:0051787 [Name: misfolded protein binding]	ath04141 [Pathway Title: Protein processing in endoplasmic reticulum]; ath03040 [Pathway Title: Spliceosome]; ath04144 [Pathway Title: Endocytosis]
AT4G36670.1	4	17287499	17289590	-	PLT6	Major facilitator superfamily protein	36	5	34	116	132	72	49.07	2.46	1.299	3.341	0.00083518	0.0190785	0.0266	0.1948	0.0773	0.0773	TRUE	0.49	GO:1901605 [Name: alpha-amino acid metabolic process]; GO:0050832 [Name: defense response to fungus]; GO:0006979 [Name: response to oxidative stress]; GO:0014070 [Name: response to organic cyclic compound]; GO:0002237 [Name: response to molecule of bacterial origin]; GO:0006970 [Name: response to osmotic stress]; GO:0007165 [Name: signal transduction]; GO:0009611 [Name: response to wounding]; GO:…	GO:0016021 [Name: integral component of membrane]	GO:0005351 [Name: sugar:proton symporter activity]	-
AT5G62470.2	5	25078991	25081101	-	MYB96	myb domain protein 96	229	22	162	549	779	365	254.29	2.436	1.285	5.017	5.25679e-07	4.78938e-05	0.0374	0.0446	0.0405	0.0405	TRUE	0.5661	GO:0010468 [Name: regulation of gene expression]; GO:0009733 [Name: response to auxin]; GO:0006952 [Name: defense response]; GO:0006355 [Name: regulation of transcription DNA-templated]; GO:0009789 [Name: positive regulation of abscisic acid-activated signaling pathway]; GO:0045893 [Name: positive regulation of transcription DNA-templated]; GO:0009414 [Name: response to water deprivation]; GO:190…	GO:0005634 [Name: nucleus]	GO:0003700 [Name: transcription factor activity sequence-specific DNA binding]; GO:0043565 [Name: sequence-specific DNA binding]	-
AT3G59350.2	3	21932525	21935192	+	PTI13	Protein kinase superfamily protein	210	45	158	716	725	392	289.13	2.418	1.274	4.686	2.78111e-06	0.000192273	0.0504	0.0403	0.0471	0.0471	TRUE	1.0819	GO:0010375 [Name: stomatal complex patterning]	GO:0005829 [Name: cytosol]; GO:0005886 [Name: plasma membrane]	GO:0004715 [Name: non-membrane spanning protein tyrosine kinase activity]; GO:0004712 [Name: protein serine/threonine/tyrosine kinase activity]; GO:0005524 [Name: ATP binding]; GO:0019901 [Name: protein kinase binding]; GO:0004713 [Name: protein tyrosine kinase activity]	ath04626 [Pathway Title: Plant-pathogen interaction]
AT1G77450.1	1	29099954	29101261	+	anac032	NAC domain containing protein 32	113	14	90	333	495	111	135.78	2.409	1.268	3.019	0.00253864	0.0444119	0.1382	0.076	0.1141	0.1141	TRUE	1.0095	GO:1900057 [Name: positive regulation of leaf senescence]; GO:0009793 [Name: embryo development ending in seed dormancy]; GO:1902890 [Name: regulation of root hair elongation]; GO:0045893 [Name: positive regulation of transcription DNA-templated]; GO:0006355 [Name: regulation of transcription DNA-templated]	GO:0005634 [Name: nucleus]	GO:0001216 [Name: bacterial-type RNA polymerase transcriptional activator activity sequence-specific DNA binding]; GO:0003700 [Name: transcription factor activity sequence-specific DNA binding]; GO:0000976 [Name: transcription regulatory region sequence-specific DNA binding]; GO:0003677 [Name: DNA binding]	-
AT5G15970.1	5	5211911	5212665	+	KIN2	stress-responsive protein (KIN2) / stress-induced protein (KIN2) / cold-responsive protein (COR6.6) / cold-regulated protein (COR6.6)	2925	454	1569	6767	10833	4060	3255.9	2.396	1.26	5.902	3.59259e-09	5.74472e-07	0.0456	0.0115	0.0323	0.0323	TRUE	0.5125	GO:0009414 [Name: response to water deprivation]; GO:0009737 [Name: response to abscisic acid]; GO:0006970 [Name: response to osmotic stress]	GO:0005829 [Name: cytosol]; GO:0005737 [Name: cytoplasm]; GO:0005634 [Name: nucleus]; GO:0009507 [Name: chloroplast]; GO:0009536 [Name: plastid]	GO:0003729 [Name: mRNA binding]	-
AT1G70830.1	1	26709947	26711462	-	MLP28	MLP-like protein 28	1056	320	893	2195	6622	2968	1729.59	2.388	1.256	4.611	4.007e-06	0.000263096	0.0884	0.014	0.0523	0.0523	TRUE	0.3557	GO:0006952 [Name: defense response]	GO:0005829 [Name: cytosol]; GO:0005739 [Name: mitochondrion]	GO:0003674 [Name: molecular_function]	-
AT5G57010.1	5	23068037	23070412	+	AT5G57010	calmodulin-binding family protein	33	6	30	105	126	64	45.75	2.387	1.255	3.264	0.00109922	0.023532	0	0.2083	0.0733	0.0733	TRUE	0.4306	GO:0031347 [Name: regulation of defense response]; GO:0009611 [Name: response to wounding]; GO:0010035 [Name: response to inorganic substance]; GO:0001666 [Name: response to hypoxia]; GO:0050832 [Name: defense response to fungus]; GO:0006979 [Name: response to oxidative stress]; GO:0014070 [Name: response to organic cyclic compound]; GO:0042742 [Name: defense response to bacterium]	GO:0005737 [Name: cytoplasm]; GO:0005634 [Name: nucleus]	-	-
AT4G37180.1	4	17504564	17506367	+	AT4G37180	Homeodomain-like superfamily protein	302	49	232	770	1222	524	379.8	2.37	1.245	7.143	9.11294e-13	3.75805e-10	0.0108	0.0327	0.0176	0.0176	TRUE	0.1897	GO:0006355 [Name: regulation of transcription DNA-templated]; GO:0048449 [Name: floral organ formation]; GO:0010629 [Name: negative regulation of gene expression]; GO:0090701 [Name: specification of plant organ identity]	GO:0005829 [Name: cytosol]; GO:0005634 [Name: nucleus]	GO:0000976 [Name: transcription regulatory region sequence-specific DNA binding]; GO:0003700 [Name: transcription factor activity sequence-specific DNA binding]; GO:0003677 [Name: DNA binding]	-
AT3G22910.1	3	8116335	8119388	-	ACA13	ATPase E1-E2 type family protein / haloacid dehalogenase-like hydrolase family protein	126	26	88	386	425	228	164.27	2.364	1.241	4.371	1.23407e-05	0.000653334	0.0396	0.0643	0.0479	0.0479	TRUE	0.7165	GO:0009414 [Name: response to water deprivation]; GO:0009737 [Name: response to abscisic acid]; GO:0050793 [Name: regulation of developmental process]; GO:0071396 [Name: cellular response to lipid]; GO:0009755 [Name: hormone-mediated signaling pathway]; GO:1901701 [Name: cellular response to oxygen-containing compound]; GO:0006970 [Name: response to osmotic stress]; GO:0070588 [Name: calcium ion …	GO:0005887 [Name: integral component of plasma membrane]; GO:0043231 [Name: intracellular membrane-bounded organelle]; GO:0016021 [Name: integral component of membrane]	GO:0019829 [Name: cation-transporting ATPase activity]; GO:0005516 [Name: calmodulin binding]; GO:0005388 [Name: calcium-transporting ATPase activity]; GO:0005524 [Name: ATP binding]; GO:0046872 [Name: metal ion binding]	-
AT5G10760.1	5	3400342	3402207	-	AT5G10760	Eukaryotic aspartyl protease family protein	120	8	136	326	501	183	149.32	2.354	1.235	3.009	0.00262007	0.0454855	0.1482	0.0699	0.1096	0.1096	TRUE	0.8209	GO:0009627 [Name: systemic acquired resistance]	GO:0048046 [Name: apoplast]	GO:0004190 [Name: aspartic-type endopeptidase activity]	-
AT1G19600.1	1	6778988	6781173	+	AT1G19600	pfkB-like carbohydrate kinase family protein	169	36	136	395	633	431	231.31	2.353	1.235	5.988	2.11887e-09	3.63548e-07	0.0127	0.0482	0.0237	0.0237	TRUE	0.2338	GO:0006351 [Name: transcription DNA-templated]; GO:0008104 [Name: protein localization]	GO:0005737 [Name: cytoplasm]	GO:0016301 [Name: kinase activity]	-
AT1G01470.1	1	172146	172948	-	LEA14	Late embryogenesis abundant protein	1606	278	1297	4890	5569	2674	2059.63	2.333	1.222	6.32	2.62096e-10	5.70447e-08	0.036	0.0131	0.0261	0.0261	TRUE	0.8735	GO:0009644 [Name: response to high light intensity]; GO:0050832 [Name: defense response to fungus]; GO:0009611 [Name: response to wounding]; GO:0009269 [Name: response to desiccation]	GO:0005829 [Name: cytosol]	GO:0003674 [Name: molecular_function]	-
AT5G14800.1	5	4785960	4787839	-	PROC1	pyrroline-5- carboxylate (P5C) reductase	86	27	87	267	522	173	143.75	2.331	1.221	3.94	8.15429e-05	0.00302326	0.0491	0.0722	0.0575	0.0575	TRUE	0.1938	GO:0055129 [Name: L-proline biosynthetic process]; GO:0009651 [Name: response to salt stress]; GO:0009408 [Name: response to heat]; GO:0006561 [Name: proline biosynthetic process]	GO:0005829 [Name: cytosol]; GO:0009505 [Name: plant-type cell wall]	GO:0004735 [Name: pyrroline-5-carboxylate reductase activity]	ath00330 [Pathway Title: Arginine and proline metabolism]; ath01100 [Pathway Title: Metabolic pathways]; ath01230 [Pathway Title: Biosynthesis of amino acids]; ath01130 [Pathway Title: Biosynthesis of antibiotics]; ath01110 [Pathway Title: Biosynthesis of secondary metabolites]
AT5G17760.1	5	5860421	5862422	-	AT5G17760	P-loop containing nucleoside triphosphate hydrolases superfamily protein	176	21	110	328	680	270	188.84	2.312	1.209	4.759	1.94786e-06	0.000142637	0.0286	0.0571	0.0379	0.0379	TRUE	0.5816	GO:0009408 [Name: response to heat]; GO:0019538 [Name: protein metabolic process]; GO:0009611 [Name: response to wounding]; GO:0009737 [Name: response to abscisic acid]; GO:0014070 [Name: response to organic cyclic compound]; GO:0002237 [Name: response to molecule of bacterial origin]; GO:0050832 [Name: defense response to fungus]; GO:1901137 [Name: carbohydrate derivative biosynthetic process]; …	GO:0005886 [Name: plasma membrane]; GO:0016021 [Name: integral component of membrane]	GO:0005524 [Name: ATP binding]; GO:0016887 [Name: ATPase activity]	-
AT5G65010.1	5	25969189	25972575	+	ASN2	asparagine synthetase 2	123	30	125	318	494	360	188.29	2.31	1.208	5.031	4.87061e-07	4.48975e-05	0.0215	0.0572	0.0329	0.0329	TRUE	0.3524	GO:0006529 [Name: asparagine biosynthetic process]; GO:0006541 [Name: glutamine metabolic process]; GO:0042538 [Name: hyperosmotic salinity response]; GO:0070981 [Name: L-asparagine biosynthetic process]; GO:0097164 [Name: ammonium ion metabolic process]	GO:0009506 [Name: plasmodesma]; GO:0005829 [Name: cytosol]	GO:0005524 [Name: ATP binding]; GO:0004066 [Name: asparagine synthase (glutamine-hydrolyzing) activity]	ath01100 [Pathway Title: Metabolic pathways]; ath01110 [Pathway Title: Biosynthesis of secondary metabolites]; ath00250 [Pathway Title: Alanine aspartate and glutamate metabolism]
AT2G36390.1	2	15264237	15270092	+	SBE2.1	starch branching enzyme 2.1	238	24	188	563	813	382	267.7	2.309	1.207	4.998	5.78954e-07	5.13543e-05	0.0306	0.0428	0.0358	0.0358	TRUE	0.4064	GO:0005978 [Name: glycogen biosynthetic process]; GO:0019252 [Name: starch biosynthetic process]; GO:0005975 [Name: carbohydrate metabolic process]; GO:0010021 [Name: amylopectin biosynthetic process]; GO:0005982 [Name: starch metabolic process]; GO:0071482 [Name: cellular response to light stimulus]; GO:0071329 [Name: cellular response to sucrose stimulus]; GO:0071332 [Name: cellular response to…	GO:0009501 [Name: amyloplast]; GO:0009507 [Name: chloroplast]; GO:0009570 [Name: chloroplast stroma]; GO:0005737 [Name: cytoplasm]	GO:0003844 [Name: 14-alpha-glucan branching enzyme activity]; GO:0043169 [Name: cation binding]; GO:0004553 [Name: hydrolase activity hydrolyzing O-glycosyl compounds]	ath00500 [Pathway Title: Starch and sucrose metabolism]; ath01100 [Pathway Title: Metabolic pathways]; ath01110 [Pathway Title: Biosynthesis of secondary metabolites]
AT1G29980.1	1	10503278	10506117	-	AT1G29980	choice-of-anchor C domain protein putative (Protein of unknown function DUF642)	61	11	69	161	295	139	90.13	2.307	1.206	4.459	8.21552e-06	0.000476825	0	0.11	0.0362	0.0362	TRUE	0.2724	GO:0043436 [Name: oxoacid metabolic process]; GO:0051301 [Name: cell division]; GO:0009832 [Name: plant-type cell wall biogenesis]; GO:0009888 [Name: tissue development]; GO:0016053 [Name: organic acid biosynthetic process]; GO:0016070 [Name: RNA metabolic process]; GO:0043412 [Name: macromolecule modification]; GO:0009059 [Name: macromolecule biosynthetic process]; GO:0048532 [Name: anatomical s…	GO:0005886 [Name: plasma membrane]; GO:0031225 [Name: anchored component of membrane]	GO:0003674 [Name: molecular_function]	-
AT3G08030.1	3	2564033	2566002	+	AT3G08030	DNA-directed RNA polymerase subunit beta (Protein of unknown function DUF642)	669	121	682	1787	2790	1491	941.12	2.297	1.2	10.203	1.92325e-24	3.76732e-21	0.004	0.0184	0.0082	0.0082	TRUE	0.1349	GO:0071396 [Name: cellular response to lipid]; GO:0007165 [Name: signal transduction]; GO:0098542 [Name: defense response to other organism]; GO:1901615 [Name: organic hydroxy compound metabolic process]; GO:0009888 [Name: tissue development]; GO:1901701 [Name: cellular response to oxygen-containing compound]; GO:0010646 [Name: regulation of cell communication]; GO:0023051 [Name: regulation of si…	GO:0005886 [Name: plasma membrane]; GO:0005643 [Name: nuclear pore]; GO:0099503 [Name: secretory vesicle]	GO:0003674 [Name: molecular_function]	-
AT1G55310.3	1	20630070	20632973	+	SCL33	SC35-like splicing factor 33	49	5	38	103	167	94	55.65	2.285	1.192	3.53	0.000416194	0.0110543	0	0.1728	0.0561	0.0561	TRUE	0.1886	GO:0008380 [Name: RNA splicing]; GO:0000398 [Name: mRNA splicing via spliceosome]	GO:0005886 [Name: plasma membrane]; GO:0016607 [Name: nuclear speck]; GO:0035061 [Name: interchromatin granule]; GO:0005634 [Name: nucleus]; GO:0005730 [Name: nucleolus]	GO:0003723 [Name: RNA binding]	ath03040 [Pathway Title: Spliceosome]
AT3G15356.1	3	5174402	5175469	-	LEC	Legume lectin family protein	61	15	48	158	253	120	83.48	2.266	1.18	4.19	2.79122e-05	0.00127647	0	0.1181	0.0392	0.0392	TRUE	0.1166	GO:0071323 [Name: cellular response to chitin]; GO:0071369 [Name: cellular response to ethylene stimulus]; GO:0071395 [Name: cellular response to jasmonic acid stimulus]; GO:0009873 [Name: ethylene-activated signaling pathway]; GO:0050832 [Name: defense response to fungus]; GO:0009611 [Name: response to wounding]	GO:0048046 [Name: apoplast]; GO:0005829 [Name: cytosol]	GO:0030246 [Name: carbohydrate binding]	-
AT2G25460.1	2	10832754	10835483	-	AT2G25460	EEIG1/EHBP1 protein amino-terminal domain protein	174	21	125	427	459	312	192.83	2.253	1.172	4.315	1.59849e-05	0.000803524	0.0386	0.0561	0.0447	0.0447	TRUE	0.1165	GO:0009863 [Name: salicylic acid mediated signaling pathway]; GO:0006970 [Name: response to osmotic stress]; GO:0009611 [Name: response to wounding]; GO:0009755 [Name: hormone-mediated signaling pathway]; GO:0042742 [Name: defense response to bacterium]; GO:0006979 [Name: response to oxidative stress]; GO:0009737 [Name: response to abscisic acid]; GO:0009753 [Name: response to jasmonic acid]; GO:…	GO:0005634 [Name: nucleus]	GO:0003674 [Name: molecular_function]	-
AT1G11950.1	1	4034587	4038758	-	AT1G11950	Transcription factor jumonji (jmjC) domain-containing protein	46	5	33	97	168	72	50.54	2.253	1.172	3.268	0.00108143	0.0232573	0.0024	0.1894	0.0639	0.0639	TRUE	0.2636	GO:0033169 [Name: histone H3-K9 demethylation]; GO:0006357 [Name: regulation of transcription from RNA polymerase II promoter]	GO:0000118 [Name: histone deacetylase complex]; GO:0000785 [Name: chromatin]	GO:0031490 [Name: chromatin DNA binding]; GO:0003712 [Name: transcription cofactor activity]; GO:0032454 [Name: histone demethylase activity (H3-K9 specific)]	-
AT4G39320.1	4	18289055	18289857	+	AT4G39320	microtubule-associated protein-like protein	170	32	150	389	586	423	225.36	2.251	1.171	5.654	1.56626e-08	2.23131e-06	0.0136	0.0492	0.024	0.024	TRUE	0.2728	GO:0019438 [Name: aromatic compound biosynthetic process]; GO:0033993 [Name: response to lipid]; GO:0009611 [Name: response to wounding]; GO:1901362 [Name: organic cyclic compound biosynthetic process]; GO:0009059 [Name: macromolecule biosynthetic process]; GO:0019748 [Name: secondary metabolic process]; GO:0071446 [Name: cellular response to salicylic acid stimulus]; GO:0023052 [Name: signaling]…	GO:0005886 [Name: plasma membrane]	GO:0003674 [Name: molecular_function]	-
AT3G63160.1	3	23333513	23334034	-	AT3G63160	outer envelope membrane protein	304	36	314	856	1083	491	380.51	2.236	1.161	4.161	3.17284e-05	0.00141252	0.0662	0.0327	0.0516	0.0516	TRUE	0.3714	GO:0009059 [Name: macromolecule biosynthetic process]; GO:0009416 [Name: response to light stimulus]; GO:0044271 [Name: cellular nitrogen compound biosynthetic process]; GO:1901566 [Name: organonitrogen compound biosynthetic process]; GO:0043436 [Name: oxoacid metabolic process]	GO:0016021 [Name: integral component of membrane]; GO:0009507 [Name: chloroplast]; GO:0009941 [Name: chloroplast envelope]; GO:0009707 [Name: chloroplast outer membrane]; GO:0009535 [Name: chloroplast thylakoid membrane]; GO:0031359 [Name: integral component of chloroplast outer membrane]; GO:0009579 [Name: thylakoid]; GO:0005829 [Name: cytosol]	GO:0003729 [Name: mRNA binding]	-
AT1G20450.1	1	7088003	7089606	-	ERD10	Dehydrin family protein	6083	1270	4712	15854	22718	12098	7986.23	2.235	1.161	9.569	1.07874e-21	1.5848e-18	0.0111	0.0098	0.0104	0.0104	TRUE	0.1406	GO:0009631 [Name: cold acclimation]; GO:0050821 [Name: protein stabilization]; GO:0009737 [Name: response to abscisic acid]; GO:0010029 [Name: regulation of seed germination]; GO:0090559 [Name: regulation of membrane permeability]; GO:0009409 [Name: response to cold]; GO:0009414 [Name: response to water deprivation]	GO:0005829 [Name: cytosol]; GO:0005634 [Name: nucleus]; GO:0019898 [Name: extrinsic component of membrane]; GO:0016020 [Name: membrane]; GO:0005737 [Name: cytoplasm]; GO:0009506 [Name: plasmodesma]	GO:0005507 [Name: copper ion binding]; GO:0016151 [Name: nickel cation binding]; GO:0031210 [Name: phosphatidylcholine binding]; GO:0003779 [Name: actin binding]; GO:0001786 [Name: phosphatidylserine binding]	-
AT1G73390.2	1	27590810	27595110	-	AT1G73390	Endosomal targeting BRO1-like domain-containing protein	79	21	54	209	390	113	107.11	2.23	1.157	3.142	0.00167737	0.0324989	0.0743	0.094	0.0822	0.0822	TRUE	0.7227	GO:0019748 [Name: secondary metabolic process]; GO:0044281 [Name: small molecule metabolic process]; GO:0009414 [Name: response to water deprivation]; GO:0009738 [Name: abscisic acid-activated signaling pathway]; GO:0009416 [Name: response to light stimulus]	GO:0005739 [Name: mitochondrion]	GO:0003674 [Name: molecular_function]	-
AT5G10300.1	5	3239617	3240870	+	HNL	methyl esterase 5	77	8	46	151	279	92	77.26	2.229	1.157	3.134	0.00172301	0.0331433	0.0523	0.1269	0.078	0.078	TRUE	0.7121	GO:0009611 [Name: response to wounding]; GO:0009694 [Name: jasmonic acid metabolic process]; GO:0009696 [Name: salicylic acid metabolic process]; GO:0016139 [Name: glycoside catabolic process]	GO:0005886 [Name: plasma membrane]; GO:0009507 [Name: chloroplast]; GO:0005737 [Name: cytoplasm]; GO:0005634 [Name: nucleus]	GO:0080030 [Name: methyl indole-3-acetate esterase activity]; GO:0080032 [Name: methyl jasmonate esterase activity]; GO:0080031 [Name: methyl salicylate esterase activity]; GO:0046593 [Name: mandelonitrile lyase activity]	-
AT5G62190.1	5	24980268	24983973	-	RH7	DEAD box RNA helicase (PRH75)	375	65	380	925	1547	808	509.77	2.22	1.15	8.734	2.46245e-18	2.31529e-15	0	0.0266	0.0095	0.0095	TRUE	0.139	GO:0016070 [Name: RNA metabolic process]	GO:0005730 [Name: nucleolus]; GO:0005634 [Name: nucleus]	GO:0005524 [Name: ATP binding]; GO:0017151 [Name: DEAD/H-box RNA helicase binding]; GO:0016887 [Name: ATPase activity]; GO:0003724 [Name: RNA helicase activity]; GO:0003723 [Name: RNA binding]	ath01110 [Pathway Title: Biosynthesis of secondary metabolites]
AT4G30650.1	4	14954320	14954968	+	AT4G30650	Low temperature and salt responsive protein family	186	46	158	558	773	318	259.77	2.206	1.141	4.692	2.70488e-06	0.000188667	0.0309	0.0438	0.0363	0.0363	TRUE	0.1082	GO:0050832 [Name: defense response to fungus]	GO:0016021 [Name: integral component of membrane]	-	-
AT3G14890.1	3	5008742	5013265	+	ZDP	phosphoesterase	67	9	56	115	216	166	79.46	2.2	1.137	3.293	0.00098996	0.0217274	0.0401	0.1236	0.0666	0.0666	TRUE	0.7402	GO:0006281 [Name: DNA repair]; GO:0046939 [Name: nucleotide phosphorylation]; GO:0080111 [Name: DNA demethylation]	GO:0005654 [Name: nucleoplasm]; GO:0005634 [Name: nucleus]	GO:0003690 [Name: double-stranded DNA binding]; GO:0046404 [Name: ATP-dependent polydeoxyribonucleotide 5'-hydroxyl-kinase activity]; GO:0046403 [Name: polynucleotide 3'-phosphatase activity]; GO:0008270 [Name: zinc ion binding]; GO:0003677 [Name: DNA binding]	-
AT5G49100.1	5	19897370	19899114	-	AT5G49100	vitellogenin-like protein	71	15	69	131	362	160	98.7	2.196	1.135	3.629	0.000284688	0.00815089	0.0346	0.1012	0.0548	0.0548	TRUE	0.1829	GO:0019538 [Name: protein metabolic process]; GO:0090698 [Name: post-embryonic plant morphogenesis]; GO:0009888 [Name: tissue development]; GO:0003002 [Name: regionalization]; GO:0009059 [Name: macromolecule biosynthetic process]; GO:0042546 [Name: cell wall biogenesis]; GO:0071669 [Name: plant-type cell wall organization or biogenesis]; GO:1901566 [Name: organonitrogen compound biosynthetic proc…	GO:0005634 [Name: nucleus]	GO:0003674 [Name: molecular_function]	-
AT4G13850.1	4	8020952	8022260	+	RBG2	glycine-rich RNA-binding protein 2	57	8	44	93	218	116	65.71	2.178	1.123	3.367	0.000758883	0.0178027	0	0.1477	0.0579	0.0579	TRUE	0.3414	GO:0009631 [Name: cold acclimation]; GO:0090615 [Name: mitochondrial mRNA processing]; GO:0050688 [Name: regulation of defense response to virus]; GO:0009409 [Name: response to cold]; GO:0009651 [Name: response to salt stress]; GO:0050658 [Name: RNA transport]; GO:1990428 [Name: miRNA transport]; GO:0009414 [Name: response to water deprivation]; GO:0006858 [Name: extracellular transport]; GO:0060…	GO:0005739 [Name: mitochondrion]; GO:0005829 [Name: cytosol]; GO:0005615 [Name: extracellular space]	GO:0003723 [Name: RNA binding]; GO:0035197 [Name: siRNA binding]; GO:0003697 [Name: single-stranded DNA binding]; GO:0005507 [Name: copper ion binding]; GO:0005524 [Name: ATP binding]; GO:0034336 [Name: misfolded RNA binding]; GO:0003690 [Name: double-stranded DNA binding]; GO:0003727 [Name: single-stranded RNA binding]; GO:0035198 [Name: miRNA binding]; GO:0003729 [Name: mRNA binding]	-
AT1G18670.1	1	6426898	6430696	-	IBS1	Protein kinase superfamily protein	95	19	70	183	355	202	117.2	2.176	1.122	4.533	5.82004e-06	0.000353504	0	0.0866	0.0315	0.0315	TRUE	0.1355	GO:0070816 [Name: phosphorylation of RNA polymerase II C-terminal domain]; GO:0006468 [Name: protein phosphorylation]; GO:0042742 [Name: defense response to bacterium]; GO:1900426 [Name: positive regulation of defense response to bacterium]; GO:1902290 [Name: positive regulation of defense response to oomycetes]; GO:0032968 [Name: positive regulation of transcription elongation from RNA polymeras…	GO:0005886 [Name: plasma membrane]; GO:0000307 [Name: cyclin-dependent protein kinase holoenzyme complex]; GO:0005634 [Name: nucleus]	GO:0005524 [Name: ATP binding]; GO:0004693 [Name: cyclin-dependent protein serine/threonine kinase activity]; GO:0008353 [Name: RNA polymerase II carboxy-terminal domain kinase activity]	-
AT1G79520.1	1	29912252	29914614	-	MTP9	Cation efflux family protein	85	14	60	207	346	97	97.81	2.167	1.115	3.093	0.00198023	0.0368838	0.0653	0.1021	0.0774	0.0774	TRUE	1.0703	GO:0006351 [Name: transcription DNA-templated]; GO:0009642 [Name: response to light intensity]; GO:0009414 [Name: response to water deprivation]; GO:0009737 [Name: response to abscisic acid]	GO:0005774 [Name: vacuolar membrane]; GO:0016021 [Name: integral component of membrane]; GO:0016020 [Name: membrane]	GO:0008324 [Name: cation transmembrane transporter activity]	-
AT4G31000.1	4	15103159	15105979	+	CBP60F	Calmodulin-binding protein	78	24	84	243	309	207	125.64	2.166	1.115	3.901	9.5716e-05	0.00346139	0.0278	0.0814	0.0463	0.0463	TRUE	0.4114	GO:0080142 [Name: regulation of salicylic acid biosynthetic process]	GO:0005634 [Name: nucleus]	GO:0003700 [Name: transcription factor activity sequence-specific DNA binding]; GO:0005516 [Name: calmodulin binding]; GO:0043565 [Name: sequence-specific DNA binding]	-
AT4G20320.2	4	10974463	10979464	+	AT4G20320	CTP synthase family protein	413	96	353	1028	1796	773	560.45	2.16	1.111	6.948	3.70967e-12	1.38412e-09	0.0105	0.025	0.0155	0.0155	TRUE	0.1626	GO:0044210 [Name: 'de novo' CTP biosynthetic process]; GO:0006541 [Name: glutamine metabolic process]; GO:0019856 [Name: pyrimidine nucleobase biosynthetic process]; GO:0006241 [Name: CTP biosynthetic process]	GO:0097268 [Name: cytoophidium]; GO:0005829 [Name: cytosol]	GO:0003883 [Name: CTP synthase activity]; GO:0042802 [Name: identical protein binding]; GO:0005524 [Name: ATP binding]	ath01100 [Pathway Title: Metabolic pathways]; ath00240 [Pathway Title: Pyrimidine metabolism]
AT1G56150.1	1	21017385	21017939	+	SAUR71	SAUR-like auxin-responsive protein family	76	18	61	201	260	149	100.01	2.147	1.102	4.082	4.4645e-05	0.0018673	0.0109	0.1	0.0377	0.0377	TRUE	0.1899	GO:0040008 [Name: regulation of growth]; GO:0009734 [Name: auxin-activated signaling pathway]; GO:0009733 [Name: response to auxin]	GO:0005737 [Name: cytoplasm]	GO:0003674 [Name: molecular_function]	ath04075 [Pathway Title: Plant hormone signal transduction]
AT3G50770.1	3	18873958	18874780	+	CML41	calmodulin-like 41	71	16	68	213	338	94	98.46	2.145	1.101	2.995	0.00274588	0.0472518	0.0711	0.1014	0.0812	0.0812	TRUE	1.1879	GO:0006979 [Name: response to oxidative stress]; GO:0031347 [Name: regulation of defense response]; GO:0098542 [Name: defense response to other organism]; GO:0009414 [Name: response to water deprivation]; GO:0009753 [Name: response to jasmonic acid]; GO:0014070 [Name: response to organic cyclic compound]; GO:0009611 [Name: response to wounding]; GO:0009737 [Name: response to abscisic acid]	GO:0009507 [Name: chloroplast]	GO:0030234 [Name: enzyme regulator activity]; GO:0005509 [Name: calcium ion binding]	ath04626 [Pathway Title: Plant-pathogen interaction]
AT1G61580.1	1	22720692	22723152	-	ARP2	R-protein L3 B	51	10	49	112	208	112	68.16	2.144	1.1	3.833	0.000126346	0.00430419	0	0.1427	0.0387	0.0387	TRUE	0.0421	GO:0000027 [Name: ribosomal large subunit assembly]; GO:0006412 [Name: translation]	GO:0005634 [Name: nucleus]; GO:0022625 [Name: cytosolic large ribosomal subunit]	GO:0003735 [Name: structural constituent of ribosome]; GO:0003723 [Name: RNA binding]	ath03010 [Pathway Title: Ribosome]
AT1G66160.1	1	24637196	24638608	+	PUB20	CYS MET PRO and GLY protein 1	131	28	116	385	392	271	174.4	2.142	1.099	4.082	4.47278e-05	0.00186744	0.0348	0.0611	0.0431	0.0431	TRUE	0.1071	GO:0002237 [Name: response to molecule of bacterial origin]; GO:0009651 [Name: response to salt stress]; GO:0071396 [Name: cellular response to lipid]; GO:0071407 [Name: cellular response to organic cyclic compound]; GO:0042742 [Name: defense response to bacterium]; GO:0006355 [Name: regulation of transcription DNA-templated]; GO:0016567 [Name: protein ubiquitination]; GO:0009753 [Name: response …	-	GO:0004842 [Name: ubiquitin-protein transferase activity]	-
AT2G19810.1	2	8550313	8551858	+	AT2G19810	CCCH-type zinc finger family protein	262	59	138	566	1001	406	307.13	2.141	1.098	3.938	8.22592e-05	0.00304501	0.058	0.0384	0.0505	0.0505	TRUE	0.9856	GO:0051607 [Name: defense response to virus]; GO:0006355 [Name: regulation of transcription DNA-templated]; GO:0006979 [Name: response to oxidative stress]	GO:0005886 [Name: plasma membrane]	GO:0046872 [Name: metal ion binding]; GO:0003677 [Name: DNA binding]; GO:0003700 [Name: transcription factor activity sequence-specific DNA binding]	-
AT1G08650.1	1	2752156	2753703	+	PPCK1	phosphoenolpyruvate carboxylase kinase 1	154	27	132	272	624	331	191.18	2.136	1.095	4.856	1.19882e-06	9.42456e-05	0.0167	0.0565	0.0287	0.0287	TRUE	0.3447	GO:0035556 [Name: intracellular signal transduction]; GO:0018105 [Name: peptidyl-serine phosphorylation]; GO:0046777 [Name: protein autophosphorylation]; GO:0046898 [Name: response to cycloheximide]; GO:0009416 [Name: response to light stimulus]	GO:0005634 [Name: nucleus]; GO:0005737 [Name: cytoplasm]	GO:0005516 [Name: calmodulin binding]; GO:0004674 [Name: protein serine/threonine kinase activity]; GO:0004683 [Name: calmodulin-dependent protein kinase activity]; GO:0004712 [Name: protein serine/threonine/tyrosine kinase activity]; GO:0005524 [Name: ATP binding]; GO:0009931 [Name: calcium-dependent protein serine/threonine kinase activity]	-
AT4G22753.2	4	11949164	11953648	-	SMO1-3		67	7	38	136	161	104	64.71	2.135	1.094	2.967	0.00301093	0.0499605	0.0373	0.1498	0.075	0.075	TRUE	0.5053	-	-	-	-
AT5G62350.1	5	25037426	25038362	+	AT5G62350	Plant invertase/pectin methylesterase inhibitor superfamily protein	355	94	321	885	1364	859	507.8	2.126	1.088	6.135	8.50965e-10	1.62624e-07	0.0151	0.0267	0.0195	0.0195	TRUE	0.3067	GO:0043086 [Name: negative regulation of catalytic activity]	GO:0009536 [Name: plastid]	GO:0004857 [Name: enzyme inhibitor activity]	-
AT4G34000.2	4	16295430	16298255	+	ABF3	abscisic acid responsive elements-binding factor 3	332	45	196	549	1108	527	338.77	2.12	1.084	5.192	2.08138e-07	2.12717e-05	0.0212	0.0357	0.0267	0.0267	TRUE	0.5676	GO:0009737 [Name: response to abscisic acid]; GO:0009414 [Name: response to water deprivation]; GO:0009738 [Name: abscisic acid-activated signaling pathway]; GO:0009651 [Name: response to salt stress]; GO:0045893 [Name: positive regulation of transcription DNA-templated]	GO:0005634 [Name: nucleus]	GO:0043565 [Name: sequence-specific DNA binding]; GO:0000976 [Name: transcription regulatory region sequence-specific DNA binding]; GO:0003700 [Name: transcription factor activity sequence-specific DNA binding]	ath04075 [Pathway Title: Plant hormone signal transduction]
AT4G17550.1	4	9777648	9779738	-	AT4G17550	Major facilitator superfamily protein	193	31	96	320	647	295	196.37	2.115	1.081	4.013	6.00673e-05	0.00236506	0.0378	0.0552	0.0441	0.0441	TRUE	0.8638	GO:0055062 [Name: phosphate ion homeostasis]; GO:0008643 [Name: carbohydrate transport]	GO:0000325 [Name: plant-type vacuole]; GO:0016021 [Name: integral component of membrane]	GO:0061513 [Name: glucose 6-phosphate:inorganic phosphate antiporter activity]	-
AT5G57050.1	5	23087235	23089627	+	ABI2	Protein phosphatase 2C family protein	222	34	182	477	966	288	259.03	2.109	1.077	4.096	4.21136e-05	0.00177724	0.0432	0.044	0.0435	0.0435	TRUE	0.1791	GO:1902456 [Name: regulation of stomatal opening]; GO:0009408 [Name: response to heat]; GO:0009414 [Name: response to water deprivation]; GO:0009737 [Name: response to abscisic acid]; GO:0006469 [Name: negative regulation of protein kinase activity]; GO:0010205 [Name: photoinhibition]; GO:0006970 [Name: response to osmotic stress]; GO:0009738 [Name: abscisic acid-activated signaling pathway]	GO:0005634 [Name: nucleus]; GO:0005829 [Name: cytosol]	GO:0004722 [Name: protein serine/threonine phosphatase activity]; GO:0046872 [Name: metal ion binding]	ath04075 [Pathway Title: Plant hormone signal transduction]; ath04931 [Pathway Title: Insulin resistance]
AT2G46270.2	2	19000191	19003403	+	GBF3	G-box binding factor 3	106	24	89	275	455	158	138.24	2.093	1.066	3.799	0.000145037	0.00476347	0.0315	0.0748	0.0455	0.0455	TRUE	0.5404	GO:0009737 [Name: response to abscisic acid]; GO:0006355 [Name: regulation of transcription DNA-templated]	GO:0005634 [Name: nucleus]	GO:0003700 [Name: transcription factor activity sequence-specific DNA binding]; GO:0043565 [Name: sequence-specific DNA binding]	-
AT2G25620.1	2	10902943	10905245	-	AtDBP1	DNA-binding protein phosphatase 1	49	8	35	97	192	71	55.16	2.092	1.065	3.059	0.00221919	0.0401263	0	0.1743	0.0613	0.0613	TRUE	0.1279	GO:0006470 [Name: protein dephosphorylation]; GO:0050688 [Name: regulation of defense response to virus]	GO:0005634 [Name: nucleus]; GO:0005829 [Name: cytosol]	GO:0046872 [Name: metal ion binding]	-
AT2G17840.1	2	7755605	7757852	-	ERD7	Senescence/dehydration-associated protein-like protein	2160	386	1619	5399	5550	4145	2536.75	2.085	1.06	5.594	2.21837e-08	2.99684e-06	0.0307	0.0123	0.0252	0.0252	TRUE	0.2947	GO:0009644 [Name: response to high light intensity]; GO:0007623 [Name: circadian rhythm]; GO:0009737 [Name: response to abscisic acid]; GO:0009651 [Name: response to salt stress]; GO:0009409 [Name: response to cold]; GO:0009414 [Name: response to water deprivation]	GO:0009507 [Name: chloroplast]; GO:0005886 [Name: plasma membrane]	GO:0003674 [Name: molecular_function]	ath04144 [Pathway Title: Endocytosis]
AT5G22650.1	5	7534017	7536273	+	HDT2	histone deacetylase 2B	325	66	263	702	1138	653	403.78	2.084	1.059	7.74	9.9159e-15	4.66166e-12	0.001	0.0313	0.0099	0.0099	TRUE	0.0436	GO:0048364 [Name: root development]; GO:0010162 [Name: seed dormancy process]; GO:0009944 [Name: polarity specification of adaxial/abaxial axis]; GO:0006325 [Name: chromatin organization]; GO:0045892 [Name: negative regulation of transcription DNA-templated]; GO:0009294 [Name: DNA mediated transformation]	GO:0009505 [Name: plant-type cell wall]; GO:0009536 [Name: plastid]; GO:0005634 [Name: nucleus]; GO:0000325 [Name: plant-type vacuole]; GO:0005739 [Name: mitochondrion]; GO:0005730 [Name: nucleolus]	GO:0004407 [Name: histone deacetylase activity]	-
AT2G32930.1	2	13965990	13968957	-	ZFN2	zinc finger nuclease 2	233	30	104	453	534	322	214.55	2.081	1.057	3.429	0.000606685	0.0149798	0.0667	0.0513	0.0609	0.0609	TRUE	0.8836	GO:0090305 [Name: nucleic acid phosphodiester bond hydrolysis]	GO:0005634 [Name: nucleus]	GO:0046872 [Name: metal ion binding]; GO:0003729 [Name: mRNA binding]; GO:0003677 [Name: DNA binding]	-
AT1G74430.1	1	27975179	27977434	+	MYB95	myb domain protein 95	340	45	216	689	953	520	348.08	2.075	1.053	5.272	1.3466e-07	1.44535e-05	0.019	0.0349	0.0242	0.0242	TRUE	0.4642	GO:0015994 [Name: chlorophyll metabolic process]; GO:0042440 [Name: pigment metabolic process]; GO:0050832 [Name: defense response to fungus]; GO:0006629 [Name: lipid metabolic process]; GO:0009611 [Name: response to wounding]; GO:0009617 [Name: response to bacterium]; GO:0006979 [Name: response to oxidative stress]; GO:0009416 [Name: response to light stimulus]; GO:0009753 [Name: response to jas…	GO:0005634 [Name: nucleus]	GO:0003700 [Name: transcription factor activity sequence-specific DNA binding]	-
AT3G55840.1	3	20716995	20718866	-	HSPRO1	Hs1pro-1 protein	301	34	295	810	911	429	345.94	2.071	1.05	3.603	0.000314542	0.00886157	0.0721	0.0351	0.0564	0.0564	TRUE	0.9198	GO:0019441 [Name: tryptophan catabolic process to kynurenine]; GO:0006952 [Name: defense response]	GO:0005737 [Name: cytoplasm]	GO:0020037 [Name: heme binding]; GO:0046872 [Name: metal ion binding]	-
AT5G59480.1	5	23979390	23981590	-	AT5G59480	Haloacid dehalogenase-like hydrolase (HAD) superfamily protein	209	45	206	529	856	384	281.4	2.062	1.044	5.957	2.5751e-09	4.3547e-07	0.0064	0.0411	0.0168	0.0168	TRUE	0.1102	GO:0009611 [Name: response to wounding]; GO:0098542 [Name: defense response to other organism]; GO:0009737 [Name: response to abscisic acid]; GO:0048589 [Name: developmental growth]	GO:0005634 [Name: nucleus]	GO:0016787 [Name: hydrolase activity]	-
AT5G57110.2	5	23109438	23117563	-	ACA8	autoinhibited Ca2+ -ATPase	357	60	273	739	1191	638	411.59	2.061	1.043	7.911	2.56132e-15	1.28099e-12	0	0.0309	0.009	0.009	TRUE	0.061	GO:0009624 [Name: response to nematode]	GO:0005887 [Name: integral component of plasma membrane]; GO:0009536 [Name: plastid]; GO:0005886 [Name: plasma membrane]; GO:0009506 [Name: plasmodesma]; GO:0043231 [Name: intracellular membrane-bounded organelle]; GO:0016021 [Name: integral component of membrane]	GO:0046872 [Name: metal ion binding]; GO:0005524 [Name: ATP binding]; GO:0005388 [Name: calcium-transporting ATPase activity]; GO:0005516 [Name: calmodulin binding]; GO:0043621 [Name: protein self-association]; GO:0019829 [Name: cation-transporting ATPase activity]	-
AT4G16500.1	4	9301388	9302022	-	CYS4	Cystatin/monellin superfamily protein	519	129	446	1324	1995	974	696.05	2.051	1.036	6.539	6.20342e-11	1.67607e-08	0.0123	0.0218	0.0158	0.0158	TRUE	0.2326	GO:0006952 [Name: defense response]	GO:0099503 [Name: secretory vesicle]; GO:0009506 [Name: plasmodesma]; GO:0005773 [Name: vacuole]; GO:0005576 [Name: extracellular region]; GO:0005829 [Name: cytosol]; GO:0000325 [Name: plant-type vacuole]	GO:0004869 [Name: cysteine-type endopeptidase inhibitor activity]	-
AT4G27520.1	4	13750440	13751905	-	ENODL2	early nodulin-like protein 2	471	78	358	1162	1406	725	536.48	2.05	1.035	5.406	6.46066e-08	7.481e-06	0.0222	0.0257	0.0234	0.0234	TRUE	0.5015	GO:0031327 [Name: negative regulation of cellular biosynthetic process]; GO:0009409 [Name: response to cold]; GO:0009414 [Name: response to water deprivation]; GO:0009651 [Name: response to salt stress]; GO:0009416 [Name: response to light stimulus]; GO:0009737 [Name: response to abscisic acid]	GO:0046658 [Name: anchored component of plasma membrane]; GO:0005886 [Name: plasma membrane]; GO:0000325 [Name: plant-type vacuole]; GO:0009507 [Name: chloroplast]; GO:0048046 [Name: apoplast]; GO:0099503 [Name: secretory vesicle]; GO:0031225 [Name: anchored component of membrane]; GO:0005829 [Name: cytosol]	GO:0009055 [Name: electron carrier activity]	-
AT3G05650.1	3	1645680	1648573	-	AtRLP32	receptor like protein 32	137	27	144	354	578	237	183.97	2.044	1.032	4.661	3.1496e-06	0.000212743	0.0133	0.0583	0.0272	0.0272	TRUE	0.2228	GO:0007165 [Name: signal transduction]	GO:0016021 [Name: integral component of membrane]; GO:0005886 [Name: plasma membrane]	GO:0016301 [Name: kinase activity]	-
AT5G64120.1	5	25659306	25661002	-	PER71	Peroxidase superfamily protein	200	48	169	535	650	391	262.73	2.04	1.029	4.734	2.19875e-06	0.000158539	0.0211	0.0435	0.0281	0.0281	TRUE	0.2122	GO:0045730 [Name: respiratory burst]; GO:0042744 [Name: hydrogen peroxide catabolic process]; GO:0006979 [Name: response to oxidative stress]; GO:0009808 [Name: lignin metabolic process]; GO:0050832 [Name: defense response to fungus]; GO:0048511 [Name: rhythmic process]	GO:0048046 [Name: apoplast]; GO:0009505 [Name: plant-type cell wall]; GO:0099503 [Name: secretory vesicle]; GO:0005576 [Name: extracellular region]; GO:0005773 [Name: vacuole]	GO:0004601 [Name: peroxidase activity]; GO:0020037 [Name: heme binding]; GO:0046872 [Name: metal ion binding]	ath01110 [Pathway Title: Biosynthesis of secondary metabolites]; ath00940 [Pathway Title: Phenylpropanoid biosynthesis]; ath01100 [Pathway Title: Metabolic pathways]
AT3G50970.1	3	18940777	18941554	+	XERO2	dehydrin family protein	867	160	625	2251	2451	1323	997.17	2.037	1.026	4.992	5.96277e-07	5.21044e-05	0.036	0.0179	0.0287	0.0287	TRUE	0.8138	GO:0050832 [Name: defense response to fungus]; GO:0009409 [Name: response to cold]; GO:0009414 [Name: response to water deprivation]; GO:0009631 [Name: cold acclimation]; GO:0009737 [Name: response to abscisic acid]; GO:0009415 [Name: response to water]	GO:0016020 [Name: membrane]; GO:0005829 [Name: cytosol]	GO:0016151 [Name: nickel cation binding]; GO:0050897 [Name: cobalt ion binding]; GO:0008270 [Name: zinc ion binding]; GO:0005507 [Name: copper ion binding]	-
AT3G53180.1	3	19706894	19711439	+	AT3G53180	nodulin/glutamine synthase-like protein	222	44	259	655	951	357	309.79	2.027	1.02	4.113	3.91041e-05	0.00167734	0.0397	0.0382	0.0391	0.0391	TRUE	0.2387	GO:0006542 [Name: glutamine biosynthetic process]; GO:0009617 [Name: response to bacterium]; GO:0048829 [Name: root cap development]; GO:0010311 [Name: lateral root formation]	GO:0005829 [Name: cytosol]	GO:0004356 [Name: glutamate-ammonia ligase activity]; GO:0016787 [Name: hydrolase activity]; GO:0043621 [Name: protein self-association]; GO:0043015 [Name: gamma-tubulin binding]	-
AT1G79440.1	1	29882210	29887412	-	ALDH5F1	aldehyde dehydrogenase 5F1	135	32	103	311	441	264	169.09	2.023	1.016	4.528	5.95611e-06	0.000360836	0.0094	0.0627	0.0275	0.0275	TRUE	0.1919	GO:0009943 [Name: adaxial/abaxial axis specification]; GO:0072593 [Name: reactive oxygen species metabolic process]; GO:0009416 [Name: response to light stimulus]; GO:0048825 [Name: cotyledon development]; GO:0009450 [Name: gamma-aminobutyric acid catabolic process]; GO:0009409 [Name: response to cold]; GO:1902074 [Name: response to salt]; GO:0048366 [Name: leaf development]; GO:0010492 [Name: ma…	GO:0009570 [Name: chloroplast stroma]; GO:0009507 [Name: chloroplast]; GO:0005759 [Name: mitochondrial matrix]; GO:0005829 [Name: cytosol]; GO:0005739 [Name: mitochondrion]	GO:0004777 [Name: succinate-semialdehyde dehydrogenase (NAD+) activity]; GO:0005507 [Name: copper ion binding]; GO:0051287 [Name: NAD binding]	ath00250 [Pathway Title: Alanine aspartate and glutamate metabolism]; ath00650 [Pathway Title: Butanoate metabolism]; ath01100 [Pathway Title: Metabolic pathways]
AT3G05060.1	3	1412867	1415966	-	NOP5-2	NOP56-like pre RNA processing ribonucleoprotein	79	21	93	212	390	154	119.47	2.022	1.016	3.721	0.000198412	0.0060886	0.0201	0.0851	0.0412	0.0412	TRUE	0.4005	GO:0042254 [Name: ribosome biogenesis]	GO:0031428 [Name: box C/D snoRNP complex]; GO:0005730 [Name: nucleolus]; GO:0032040 [Name: small-subunit processome]	GO:0030515 [Name: snoRNA binding]; GO:0003729 [Name: mRNA binding]	ath03008 [Pathway Title: Ribosome biogenesis in eukaryotes]
AT3G09390.1	3	2889486	2890229	-	MT2A	metallothionein 2A	2808	547	2192	6571	11565	3441	3344.05	2.019	1.014	4.69	2.73224e-06	0.000189451	0.0431	0.0114	0.0331	0.0331	TRUE	1.0298	GO:0006878 [Name: cellular copper ion homeostasis]	-	GO:0046872 [Name: metal ion binding]; GO:0005507 [Name: copper ion binding]	-
AT5G62720.1	5	25191842	25195009	+	AT5G62720	Integral membrane HPP family protein	131	19	126	302	429	243	157.6	2.019	1.014	4.638	3.51967e-06	0.000234372	0.0054	0.0666	0.0254	0.0254	TRUE	0.1387	GO:0015706 [Name: nitrate transport]	GO:0009706 [Name: chloroplast inner membrane]; GO:0009507 [Name: chloroplast]; GO:0016021 [Name: integral component of membrane]; GO:0009941 [Name: chloroplast envelope]	GO:0015112 [Name: nitrate transmembrane transporter activity]	-
AT3G61830.1	3	22887889	22891435	+	ARF18	auxin response factor 18	97	13	67	227	259	133	100.89	2.018	1.013	3.236	0.00121155	0.0253606	0.0356	0.0992	0.0558	0.0558	TRUE	0.632	GO:0006355 [Name: regulation of transcription DNA-templated]; GO:0009734 [Name: auxin-activated signaling pathway]	GO:0005634 [Name: nucleus]	GO:0003677 [Name: DNA binding]; GO:0003700 [Name: transcription factor activity sequence-specific DNA binding]; GO:0042802 [Name: identical protein binding]; GO:0000976 [Name: transcription regulatory region sequence-specific DNA binding]	-
AT3G48460.1	3	17949445	17951195	+	AT3G48460	GDSL-like Lipase/Acylhydrolase superfamily protein	80	17	55	153	249	158	93.13	2.009	1.007	3.649	0.000262863	0.00765657	0.0068	0.1068	0.0393	0.0393	TRUE	0.2586	GO:0016042 [Name: lipid catabolic process]; GO:0006631 [Name: fatty acid metabolic process]	GO:0005576 [Name: extracellular region]	GO:0008126 [Name: acetylesterase activity]; GO:0016788 [Name: hydrolase activity acting on ester bonds]	-
AT3G59480.1	3	21983021	21984598	+	AT3G59480	pfkB-like carbohydrate kinase family protein	88	9	67	154	272	145	90.23	2.009	1.007	3.565	0.000363808	0.0098938	0	0.1099	0.0419	0.0419	TRUE	0.2662	GO:0019252 [Name: starch biosynthetic process]; GO:0006000 [Name: fructose metabolic process]	GO:0005829 [Name: cytosol]	GO:0008865 [Name: fructokinase activity]; GO:0005524 [Name: ATP binding]; GO:0016773 [Name: phosphotransferase activity alcohol group as acceptor]; GO:0016301 [Name: kinase activity]	ath00500 [Pathway Title: Starch and sucrose metabolism]; ath00051 [Pathway Title: Fructose and mannose metabolism]; ath00520 [Pathway Title: Amino sugar and nucleotide sugar metabolism]; ath01100 [Pathway Title: Metabolic pathways]
AT2G37480.2	2	15737842	15739848	+	AT2G37480	uncharacterized protein	72	14	51	151	250	110	82.09	2.002	1.002	3.579	0.000345031	0.00947466	0	0.1199	0.0393	0.0393	TRUE	0.1585	GO:0008150 [Name: biological_process]	GO:0005634 [Name: nucleus]	GO:0003674 [Name: molecular_function]	-
AT3G57010.1	3	21095654	21097451	-	SSL8	Calcium-dependent phosphotriesterase superfamily protein	58	15	60	147	258	106	81.86	2.002	1.001	3.425	0.000615405	0.0151157	0.0095	0.1203	0.0441	0.0441	TRUE	0.1978	GO:0009058 [Name: biosynthetic process]	GO:0005773 [Name: vacuole]; GO:0005783 [Name: endoplasmic reticulum]; GO:0016021 [Name: integral component of membrane]	GO:0016844 [Name: strictosidine synthase activity]	-

## Sheet: WP AXE XYL RNAseq_downregulated
ID	seqnames	start	end	strand	gene_name	Description	WT1	WT3	WT4	AFC2	AFC3	AFC4	baseMean	FoldChange	log2FoldChange	stat	pvalue	padj	dispGeneEst	dispFit	dispMAP	dispersion	betaConv	maxCooks	GO...Biological.Process	GO...Cellular.Component	GO...Molecular.Function	KEGG.Pathway.Info
AT3G28917.1	3	10924817	10925640	+	MIF2	mini zinc finger 2	127	21	105	44	127	62	72.88	0.5	-1	-3.033	0.00242341	0.0430736	0.0273	0.134	0.0624	0.0624	TRUE	0.6122	GO:0035670 [Name: plant-type ovary development]; GO:0010582 [Name: floral meristem determinacy]; GO:0006355 [Name: regulation of transcription DNA-templated]	GO:0005737 [Name: cytoplasm]; GO:0005634 [Name: nucleus]	GO:0046872 [Name: metal ion binding]; GO:0042803 [Name: protein homodimerization activity]; GO:0003700 [Name: transcription factor activity sequence-specific DNA binding]; GO:0003677 [Name: DNA binding]; GO:0000976 [Name: transcription regulatory region sequence-specific DNA binding]	-
AT2G45220.1	2	18644084	18646447	-	PME17	Plant invertase/pectin methylesterase inhibitor superfamily	2112	394	1586	830	1702	1177	1223.41	0.498	-1.006	-5.222	1.76681e-07	1.83764e-05	0.0319	0.0162	0.0257	0.0257	TRUE	0.6208	GO:0050829 [Name: defense response to Gram-negative bacterium]; GO:0009620 [Name: response to fungus]; GO:0045490 [Name: pectin catabolic process]; GO:0009617 [Name: response to bacterium]; GO:0042545 [Name: cell wall modification]	GO:0005576 [Name: extracellular region]	GO:0046910 [Name: pectinesterase inhibitor activity]; GO:0045330 [Name: aspartyl esterase activity]; GO:0030599 [Name: pectinesterase activity]	ath01100 [Pathway Title: Metabolic pathways]; ath00040 [Pathway Title: Pentose and glucuronate interconversions]; ath00500 [Pathway Title: Starch and sucrose metabolism]
AT5G23860.1	5	8042876	8044819	+	TUBB8	tubulin beta 8	4052	857	3167	1979	3119	2306	2485.52	0.498	-1.006	-6.001	1.96258e-09	3.39208e-07	0.0254	0.0124	0.0198	0.0198	TRUE	0.4387	GO:0000226 [Name: microtubule cytoskeleton organization]; GO:0007017 [Name: microtubule-based process]; GO:0000278 [Name: mitotic cell cycle]	GO:0005829 [Name: cytosol]; GO:0005874 [Name: microtubule]; GO:0045298 [Name: tubulin complex]; GO:0005737 [Name: cytoplasm]; GO:0005794 [Name: Golgi apparatus]	GO:0005525 [Name: GTP binding]; GO:0003924 [Name: GTPase activity]; GO:0005200 [Name: structural constituent of cytoskeleton]; GO:0003729 [Name: mRNA binding]	ath04145 [Pathway Title: Phagosome]
AT4G20260.6	4	10940746	10943495	+	PCAP1	plasma-membrane associated cation-binding protein 1	93	21	111	65	107	39	67.09	0.498	-1.007	-3.039	0.00237681	0.0424538	0.024	0.1448	0.0618	0.0618	TRUE	0.2564	GO:0071472 [Name: cellular response to salt stress]; GO:0009409 [Name: response to cold]; GO:0043622 [Name: cortical microtubule organization]; GO:0051592 [Name: response to calcium ion]; GO:0071219 [Name: cellular response to molecule of bacterial origin]; GO:0071286 [Name: cellular response to magnesium ion]; GO:0031115 [Name: negative regulation of microtubule polymerization]; GO:0009414 [Name…	GO:0046658 [Name: anchored component of plasma membrane]	GO:0043325 [Name: phosphatidylinositol-34-bisphosphate binding]; GO:0080025 [Name: phosphatidylinositol-35-bisphosphate binding]; GO:0005507 [Name: copper ion binding]; GO:0005515 [Name: protein binding]; GO:0005516 [Name: calmodulin binding]; GO:0005547 [Name: phosphatidylinositol-345-trisphosphate binding]; GO:0005509 [Name: calcium ion binding]; GO:0005546 [Name: phosphatidylinositol-45-bispho…	-
AT2G31380.1	2	13381910	13383470	+	BBX25	salt tolerance homologue	138	24	127	67	131	64	83.51	0.497	-1.008	-4.015	5.94686e-05	0.00234896	0	0.118	0.032	0.032	TRUE	0.0499	GO:0009640 [Name: photomorphogenesis]; GO:0006355 [Name: regulation of transcription DNA-templated]; GO:0010100 [Name: negative regulation of photomorphogenesis]	GO:0005634 [Name: nucleus]	GO:0008270 [Name: zinc ion binding]; GO:0003700 [Name: transcription factor activity sequence-specific DNA binding]	-
AT5G47960.1	5	19421384	19422533	-	RABA4C	RAB GTPase homolog A4C	121	22	117	66	114	55	75.48	0.497	-1.009	-3.87	0.000108666	0.00384684	0	0.1297	0.0342	0.0342	TRUE	0.061	GO:0015031 [Name: protein transport]	GO:0005794 [Name: Golgi apparatus]; GO:0005886 [Name: plasma membrane]; GO:0009536 [Name: plastid]; GO:0005768 [Name: endosome]	GO:0005525 [Name: GTP binding]; GO:0003924 [Name: GTPase activity]	ath04144 [Pathway Title: Endocytosis]
AT3G05890.1	3	1757631	1758492	-	RCI2B	Low temperature and salt responsive protein family	215	36	201	121	186	91	129.03	0.496	-1.012	-4.561	5.09861e-06	0.000320449	0	0.0795	0.0268	0.0268	TRUE	0.1113	GO:0009409 [Name: response to cold]	GO:0016021 [Name: integral component of membrane]	-	-
AT3G56710.1	3	21006750	21007565	-	SIB1	sigma factor binding protein 1	420	88	408	233	410	198	273.3	0.495	-1.015	-6.632	3.32026e-11	9.29118e-09	0	0.0421	0.0127	0.0127	TRUE	0.0663	GO:0071482 [Name: cellular response to light stimulus]; GO:0051091 [Name: positive regulation of sequence-specific DNA binding transcription factor activity]; GO:0042742 [Name: defense response to bacterium]	GO:0009507 [Name: chloroplast]; GO:0005634 [Name: nucleus]	GO:0005515 [Name: protein binding]	-
AT2G20610.2	2	8877961	8880388	-	SUR1	Tyrosine transaminase family protein	84	24	104	58	88	52	66.58	0.494	-1.018	-3.181	0.00146948	0.0293622	0.0188	0.1459	0.0561	0.0561	TRUE	0.5384	GO:0019761 [Name: glucosinolate biosynthetic process]; GO:0001560 [Name: regulation of cell growth by extracellular stimulus]; GO:0050832 [Name: defense response to fungus]; GO:0048830 [Name: adventitious root development]; GO:0006520 [Name: cellular amino acid metabolic process]; GO:0009684 [Name: indoleacetic acid biosynthetic process]	GO:0005829 [Name: cytosol]; GO:0005739 [Name: mitochondrion]	GO:0080108 [Name: S-alkylthiohydroximate lyase activity]; GO:0016846 [Name: carbon-sulfur lyase activity]; GO:0030170 [Name: pyridoxal phosphate binding]; GO:0008483 [Name: transaminase activity]	ath00380 [Pathway Title: Tryptophan metabolism]; ath00966 [Pathway Title: Glucosinolate biosynthesis]; ath01110 [Pathway Title: Biosynthesis of secondary metabolites]; ath01210 [Pathway Title: 2-Oxocarboxylic acid metabolism]
AT4G29110.1	4	14348801	14349701	+	AT4G29110	cotton fiber protein	156	49	138	73	188	92	114.9	0.493	-1.019	-3.113	0.00185005	0.0349295	0.0545	0.0882	0.0665	0.0665	TRUE	0.6455	GO:0006351 [Name: transcription DNA-templated]; GO:0048589 [Name: developmental growth]; GO:0019748 [Name: secondary metabolic process]; GO:0009416 [Name: response to light stimulus]; GO:0010556 [Name: regulation of macromolecule biosynthetic process]; GO:0051254 [Name: positive regulation of RNA metabolic process]; GO:0031326 [Name: regulation of cellular biosynthetic process]	GO:0000325 [Name: plant-type vacuole]	GO:0003674 [Name: molecular_function]	-
AT4G17870.1	4	9928678	9929518	+	PYR1	Polyketide cyclase/dehydrase and lipid transport superfamily protein	407	107	338	219	357	233	273.62	0.493	-1.02	-4.721	2.343e-06	0.000166388	0.0221	0.0421	0.0292	0.0292	TRUE	0.4132	GO:0009738 [Name: abscisic acid-activated signaling pathway]; GO:1902584 [Name: positive regulation of response to water deprivation]; GO:0080163 [Name: regulation of protein serine/threonine phosphatase activity]	GO:0005886 [Name: plasma membrane]; GO:0005737 [Name: cytoplasm]; GO:0009705 [Name: plant-type vacuole membrane]; GO:0005829 [Name: cytosol]; GO:0005634 [Name: nucleus]	GO:0004864 [Name: protein phosphatase inhibitor activity]; GO:0042802 [Name: identical protein binding]; GO:0042803 [Name: protein homodimerization activity]; GO:0038023 [Name: signaling receptor activity]; GO:0010427 [Name: abscisic acid binding]; GO:0044389 [Name: ubiquitin-like protein ligase binding]	ath04075 [Pathway Title: Plant hormone signal transduction]
AT2G03550.1	2	1077036	1078083	+	CXE7	alpha/beta-Hydrolases superfamily protein	135	33	117	68	131	69	88.95	0.492	-1.022	-3.905	9.41909e-05	0.00342203	0	0.1114	0.0363	0.0363	TRUE	0.1333	GO:0009416 [Name: response to light stimulus]; GO:0044283 [Name: small molecule biosynthetic process]; GO:0009611 [Name: response to wounding]; GO:0006790 [Name: sulfur compound metabolic process]; GO:0033993 [Name: response to lipid]	-	GO:0080030 [Name: methyl indole-3-acetate esterase activity]; GO:0016787 [Name: hydrolase activity]	-
AT2G43100.1	2	17920660	17921689	+	IPMI2	isopropylmalate isomerase 2	364	99	245	216	304	176	235.11	0.492	-1.022	-3.809	0.000139678	0.00465395	0.0461	0.0475	0.0466	0.0466	TRUE	0.2707	GO:0019761 [Name: glucosinolate biosynthetic process]; GO:0009098 [Name: leucine biosynthetic process]; GO:0043436 [Name: oxoacid metabolic process]	GO:0009570 [Name: chloroplast stroma]; GO:0009536 [Name: plastid]	GO:0003861 [Name: 3-isopropylmalate dehydratase activity]; GO:0016836 [Name: hydro-lyase activity]	ath01110 [Pathway Title: Biosynthesis of secondary metabolites]; ath01210 [Pathway Title: 2-Oxocarboxylic acid metabolism]; ath01100 [Pathway Title: Metabolic pathways]; ath01230 [Pathway Title: Biosynthesis of amino acids]; ath00290 [Pathway Title: Valine leucine and isoleucine biosynthesis]; ath00660 [Pathway Title: C5-Branched dibasic acid metabolism]
AT3G01500.2	3	194724	198019	-	BCA1	carbonic anhydrase 1	463	108	285	210	440	199	274.27	0.492	-1.023	-4.049	5.15286e-05	0.00210283	0.0398	0.042	0.0415	0.0415	TRUE	0.1138	GO:0010119 [Name: regulation of stomatal movement]; GO:0015979 [Name: photosynthesis]; GO:0009409 [Name: response to cold]; GO:0050832 [Name: defense response to fungus]; GO:2000122 [Name: negative regulation of stomatal complex development]; GO:0015976 [Name: carbon utilization]; GO:0010037 [Name: response to carbon dioxide]	GO:0009570 [Name: chloroplast stroma]; GO:0005829 [Name: cytosol]; GO:0010319 [Name: stromule]; GO:0009507 [Name: chloroplast]; GO:0009579 [Name: thylakoid]; GO:0009941 [Name: chloroplast envelope]; GO:0048046 [Name: apoplast]; GO:0009535 [Name: chloroplast thylakoid membrane]; GO:0005886 [Name: plasma membrane]	GO:0008270 [Name: zinc ion binding]; GO:0004089 [Name: carbonate dehydratase activity]; GO:0003729 [Name: mRNA binding]	ath00910 [Pathway Title: Nitrogen metabolism]
AT5G42250.1	5	16894009	16897620	+	AT5G42250	Zinc-binding alcohol dehydrogenase family protein	201	47	193	103	147	139	135.7	0.491	-1.026	-3.388	0.00070314	0.0167797	0.0456	0.076	0.057	0.057	TRUE	0.962	GO:0046294 [Name: formaldehyde catabolic process]	GO:0005829 [Name: cytosol]	GO:0051903 [Name: S-(hydroxymethyl)glutathione dehydrogenase activity]; GO:0008270 [Name: zinc ion binding]; GO:0004024 [Name: alcohol dehydrogenase activity zinc-dependent]; GO:0016491 [Name: oxidoreductase activity]	ath00071 [Pathway Title: Fatty acid degradation]; ath01200 [Pathway Title: Carbon metabolism]; ath00010 [Pathway Title: Glycolysis / Gluconeogenesis]; ath01220 [Pathway Title: Degradation of aromatic compounds]; ath00350 [Pathway Title: Tyrosine metabolism]; ath01130 [Pathway Title: Biosynthesis of antibiotics]; ath01100 [Pathway Title: Metabolic pathways]; ath01110 [Pathway Title: Biosynthesis o…
AT5G57785.1	5	23408896	23409422	-	AT5G57785	uncharacterized protein	191	47	150	84	157	115	122	0.489	-1.033	-3.671	0.000241631	0.0071354	0.0284	0.0836	0.0472	0.0472	TRUE	0.48	GO:0043170 [Name: macromolecule metabolic process]; GO:0045893 [Name: positive regulation of transcription DNA-templated]; GO:0019748 [Name: secondary metabolic process]	GO:0005739 [Name: mitochondrion]	GO:0003674 [Name: molecular_function]	-
AT1G74650.1	1	28041191	28042995	+	ATY13	myb domain protein 31	206	34	186	76	165	123	121.39	0.489	-1.034	-3.456	0.000548864	0.0138133	0.039	0.0839	0.0546	0.0546	TRUE	0.795	GO:0009733 [Name: response to auxin]	GO:0005634 [Name: nucleus]; GO:0005737 [Name: cytoplasm]	GO:0003700 [Name: transcription factor activity sequence-specific DNA binding]	-
AT3G18773.1	3	6465825	6467175	+	ATL77	RING/U-box superfamily protein	91	22	69	51	91	33	57.19	0.488	-1.034	-2.983	0.00285533	0.048267	0.0173	0.1684	0.066	0.066	TRUE	0.2491	GO:0016567 [Name: protein ubiquitination]	GO:0016021 [Name: integral component of membrane]	GO:0016740 [Name: transferase activity]; GO:0046872 [Name: metal ion binding]	-
AT2G32720.1	2	13876774	13878531	-	CYTB5-B	cytochrome B5 isoform B	977	195	808	487	717	524	590.59	0.487	-1.037	-6.42	1.36293e-10	3.17198e-08	0.0131	0.0242	0.0167	0.0167	TRUE	0.2783	GO:0042761 [Name: very long-chain fatty acid biosynthetic process]; GO:0043447 [Name: alkane biosynthetic process]	GO:0016021 [Name: integral component of membrane]; GO:0005789 [Name: endoplasmic reticulum membrane]; GO:0016020 [Name: membrane]; GO:0005783 [Name: endoplasmic reticulum]; GO:0043231 [Name: intracellular membrane-bounded organelle]	GO:0020037 [Name: heme binding]; GO:0046872 [Name: metal ion binding]	-
AT3G05400.1	3	1549586	1554148	+	SUGTL5	Major facilitator superfamily protein	284	33	216	138	185	112	143.61	0.487	-1.039	-4.149	3.33613e-05	0.00147128	0.0192	0.0723	0.037	0.037	TRUE	0.1752	-	GO:0016021 [Name: integral component of membrane]	GO:0051119 [Name: sugar transmembrane transporter activity]	-
AT3G61910.1	3	22929006	22930442	-	NAC066	NAC domain protein 66	134	25	104	67	96	66	77.77	0.487	-1.039	-3.801	0.000143878	0.00474701	0	0.1261	0.039	0.039	TRUE	0.1603	GO:0009834 [Name: plant-type secondary cell wall biogenesis]; GO:0045893 [Name: positive regulation of transcription DNA-templated]	GO:0005634 [Name: nucleus]	GO:0000976 [Name: transcription regulatory region sequence-specific DNA binding]; GO:0003700 [Name: transcription factor activity sequence-specific DNA binding]	-
AT3G21710.1	3	7648342	7649785	+	AT3G21710	uncharacterized protein	374	80	325	232	251	192	235.48	0.485	-1.045	-4.493	7.03611e-06	0.000412446	0.027	0.0475	0.0338	0.0338	TRUE	0.5817	GO:0010089 [Name: xylem development]	GO:0005634 [Name: nucleus]; GO:0005829 [Name: cytosol]	GO:0003674 [Name: molecular_function]	-
AT1G22410.1	1	7912046	7915003	+	AT1G22410	Class-II DAHP synthetase family protein	3749	743	2633	1715	2700	1912	2156.28	0.484	-1.048	-6.294	3.10141e-10	6.50908e-08	0.0241	0.0129	0.0194	0.0194	TRUE	0.3217	GO:0008652 [Name: cellular amino acid biosynthetic process]; GO:0009423 [Name: chorismate biosynthetic process]; GO:0009073 [Name: aromatic amino acid family biosynthetic process]	GO:0009507 [Name: chloroplast]; GO:0009536 [Name: plastid]	GO:0003849 [Name: 3-deoxy-7-phosphoheptulonate synthase activity]	ath01110 [Pathway Title: Biosynthesis of secondary metabolites]; ath01230 [Pathway Title: Biosynthesis of amino acids]; ath00400 [Pathway Title: Phenylalanine tyrosine and tryptophan biosynthesis]; ath01130 [Pathway Title: Biosynthesis of antibiotics]; ath01100 [Pathway Title: Metabolic pathways]
AT1G72930.1	1	27439452	27440464	+	TIR	toll/interleukin-1 receptor-like protein	1016	234	1047	674	966	443	692.79	0.482	-1.053	-6.371	1.87657e-10	4.2414e-08	0.0149	0.0219	0.0179	0.0179	TRUE	0.2105	GO:0006952 [Name: defense response]; GO:0007165 [Name: signal transduction]	GO:0005739 [Name: mitochondrion]; GO:0009506 [Name: plasmodesma]	GO:0050135 [Name: NAD(P)+ nucleosidase activity]; GO:0061809 [Name: NAD+ nucleotidase cyclic ADP-ribose generating]	-
AT2G22170.1	2	9426849	9427817	-	AT2G22170	Lipase/lipooxygenase PLAT/LH2 family protein	282	78	263	152	255	169	198.52	0.481	-1.056	-4.523	6.11011e-06	0.000368267	0.0218	0.0547	0.0332	0.0332	TRUE	0.3502	GO:0048589 [Name: developmental growth]; GO:0090558 [Name: plant epidermis development]; GO:0051301 [Name: cell division]; GO:0010015 [Name: root morphogenesis]; GO:0006979 [Name: response to oxidative stress]; GO:0009059 [Name: macromolecule biosynthetic process]; GO:0009611 [Name: response to wounding]; GO:0010035 [Name: response to inorganic substance]; GO:0014070 [Name: response to organic cy…	GO:0005783 [Name: endoplasmic reticulum]; GO:0099503 [Name: secretory vesicle]; GO:0009579 [Name: thylakoid]; GO:0005773 [Name: vacuole]	-	-
AT4G16880.1	4	9496185	9497313	-	AT4G16880	Leucine-rich repeat (LRR) family protein	145	27	137	73	104	82	89.49	0.478	-1.064	-3.802	0.00014355	0.00474582	0.0132	0.1107	0.0434	0.0434	TRUE	0.333	GO:0006952 [Name: defense response]	GO:0005737 [Name: cytoplasm]; GO:0005794 [Name: Golgi apparatus]; GO:0048046 [Name: apoplast]	GO:0003674 [Name: molecular_function]	-
AT1G70230.1	1	26450245	26451945	+	AXY4	TRICHOME BIREFRINGENCE-LIKE 27	100	20	91	57	73	50	62.22	0.477	-1.068	-3.534	0.000409881	0.0109236	0	0.1555	0.0474	0.0474	TRUE	0.2375	GO:0010411 [Name: xyloglucan metabolic process]	GO:0016021 [Name: integral component of membrane]; GO:0005794 [Name: Golgi apparatus]; GO:0000139 [Name: Golgi membrane]	GO:0016413 [Name: O-acetyltransferase activity]	-
AT3G21690.1	3	7638663	7642205	+	AT3G21690	MATE efflux family protein	181	33	167	90	204	56	109.41	0.477	-1.069	-3.417	0.000632736	0.0154606	0.043	0.0922	0.0596	0.0596	TRUE	0.6097	GO:1990961 [Name: drug transmembrane export]	GO:0016020 [Name: membrane]; GO:0005773 [Name: vacuole]; GO:0016021 [Name: integral component of membrane]; GO:0000325 [Name: plant-type vacuole]; GO:0005774 [Name: vacuolar membrane]	GO:0015297 [Name: antiporter activity]; GO:0022857 [Name: transmembrane transporter activity]; GO:0042910 [Name: xenobiotic transporter activity]	-
AT4G38620.1	4	18053551	18054999	+	MYB4	myb domain protein 4	187	50	209	107	198	102	137.5	0.475	-1.074	-4.54	5.62039e-06	0.000345845	0.0128	0.0751	0.0316	0.0316	TRUE	0.2648	GO:0010224 [Name: response to UV-B]; GO:1903086 [Name: negative regulation of sinapate ester biosynthetic process]; GO:2000762 [Name: regulation of phenylpropanoid metabolic process]; GO:0045892 [Name: negative regulation of transcription DNA-templated]	GO:0005634 [Name: nucleus]	GO:0003700 [Name: transcription factor activity sequence-specific DNA binding]; GO:0000976 [Name: transcription regulatory region sequence-specific DNA binding]; GO:0003677 [Name: DNA binding]	-
AT3G01750.1	3	270229	272976	+	AT3G01750	Ankyrin repeat family protein	192	32	179	79	171	95	113.77	0.475	-1.075	-4.406	1.05539e-05	0.000585093	0.0051	0.089	0.0328	0.0328	TRUE	0.2314	GO:0048580 [Name: regulation of post-embryonic development]; GO:0019538 [Name: protein metabolic process]; GO:0009416 [Name: response to light stimulus]; GO:0098542 [Name: defense response to other organism]; GO:0009908 [Name: flower development]; GO:2000241 [Name: regulation of reproductive process]	GO:0005737 [Name: cytoplasm]	-	-
AT5G07250.1	5	2274260	2275990	-	ATRBL3	RHOMBOID-like protein 3	185	66	161	110	201	106	142.64	0.475	-1.075	-3.352	0.000801988	0.0185729	0.0608	0.0727	0.0653	0.0653	TRUE	1.2243	-	GO:0016021 [Name: integral component of membrane]; GO:0000139 [Name: Golgi membrane]; GO:0009506 [Name: plasmodesma]	GO:0004252 [Name: serine-type endopeptidase activity]	-
AT1G09540.1	1	3086159	3087912	+	MYB61	myb domain protein 61	276	46	235	104	241	133	157.95	0.474	-1.078	-4.691	2.7154e-06	0.000188841	0.0126	0.0665	0.0306	0.0306	TRUE	0.3618	GO:0010087 [Name: phloem or xylem histogenesis]; GO:0010119 [Name: regulation of stomatal movement]; GO:0010214 [Name: seed coat development]; GO:0010089 [Name: xylem development]; GO:0048364 [Name: root development]	GO:0005634 [Name: nucleus]	GO:0003700 [Name: transcription factor activity sequence-specific DNA binding]; GO:0000976 [Name: transcription regulatory region sequence-specific DNA binding]	-
AT1G76090.1	1	28550409	28551781	-	SMT3	sterol methyltransferase 3	67	13	58	31	55	33	40.4	0.473	-1.079	-3.081	0.00206306	0.0380348	0	0.2348	0.0603	0.0603	TRUE	0.0565	GO:0016126 [Name: sterol biosynthetic process]; GO:0032259 [Name: methylation]	GO:0016021 [Name: integral component of membrane]; GO:0005783 [Name: endoplasmic reticulum]	GO:0008168 [Name: methyltransferase activity]; GO:0030797 [Name: 24-methylenesterol C-methyltransferase activity]; GO:0003838 [Name: sterol 24-C-methyltransferase activity]	ath00100 [Pathway Title: Steroid biosynthesis]; ath01110 [Pathway Title: Biosynthesis of secondary metabolites]
AT3G59845.1	3	22106243	22107862	-	AT3G59845	Zinc-binding dehydrogenase family protein	706	137	681	332	645	343	441.48	0.472	-1.084	-7.861	3.80562e-15	1.86364e-12	0.0035	0.0294	0.011	0.011	TRUE	0.0843	GO:0006979 [Name: response to oxidative stress]	GO:0005737 [Name: cytoplasm]	GO:0032440 [Name: 2-alkenal reductase [NAD(P)] activity]; GO:0016628 [Name: oxidoreductase activity acting on the CH-CH group of donors NAD or NADP as acceptor]	-
AT1G22530.1	1	7955493	7958442	-	PATL2	PATELLIN 2	754	133	642	305	575	397	438.22	0.47	-1.091	-5.872	4.31066e-09	6.66621e-07	0.018	0.0295	0.0221	0.0221	TRUE	0.4617	GO:0071365 [Name: cellular response to auxin stimulus]; GO:0051301 [Name: cell division]; GO:1901703 [Name: protein localization involved in auxin polar transport]; GO:0007049 [Name: cell cycle]	GO:0005634 [Name: nucleus]; GO:0005886 [Name: plasma membrane]; GO:0005794 [Name: Golgi apparatus]	GO:0008289 [Name: lipid binding]; GO:0002020 [Name: protease binding]	-
AT5G58680.1	5	23708112	23709351	-	AT5G58680	ARM repeat superfamily protein	246	30	177	107	197	73	121.57	0.47	-1.091	-3.985	6.73727e-05	0.00257088	0.0242	0.0838	0.0443	0.0443	TRUE	0.0983	GO:0006355 [Name: regulation of transcription DNA-templated]; GO:0009409 [Name: response to cold]; GO:1901575 [Name: organic substance catabolic process]; GO:0009414 [Name: response to water deprivation]; GO:0009651 [Name: response to salt stress]; GO:0009737 [Name: response to abscisic acid]; GO:0009753 [Name: response to jasmonic acid]; GO:0023052 [Name: signaling]	GO:0005737 [Name: cytoplasm]; GO:0005634 [Name: nucleus]	-	-
AT3G62770.1	3	23218633	23221232	-	ATG18A	Transducin/WD40 repeat-like superfamily protein	92	18	73	31	79	49	53.89	0.469	-1.093	-3.006	0.00265018	0.0459066	0.0191	0.1782	0.0734	0.0734	TRUE	0.5303	GO:0010508 [Name: positive regulation of autophagy]; GO:0009651 [Name: response to salt stress]; GO:0034497 [Name: protein localization to pre-autophagosomal structure]; GO:0010150 [Name: leaf senescence]; GO:0006970 [Name: response to osmotic stress]; GO:0006979 [Name: response to oxidative stress]; GO:0006914 [Name: autophagy]; GO:0050832 [Name: defense response to fungus]; GO:0015031 [Name: pr…	GO:0005774 [Name: vacuolar membrane]; GO:0005829 [Name: cytosol]; GO:0005634 [Name: nucleus]; GO:0034045 [Name: pre-autophagosomal structure membrane]; GO:0019898 [Name: extrinsic component of membrane]	GO:0080025 [Name: phosphatidylinositol-35-bisphosphate binding]; GO:0032266 [Name: phosphatidylinositol-3-phosphate binding]	-
AT1G23040.1	1	8164959	8165862	+	AT1G23040	hydroxyproline-rich glycoprotein family protein	133	34	122	60	142	64	89.23	0.468	-1.094	-3.799	0.000145097	0.00476347	0.0166	0.111	0.0464	0.0464	TRUE	0.2413	GO:0009651 [Name: response to salt stress]; GO:0010150 [Name: leaf senescence]; GO:0015996 [Name: chlorophyll catabolic process]; GO:0048366 [Name: leaf development]; GO:0009414 [Name: response to water deprivation]	GO:0016021 [Name: integral component of membrane]; GO:0031225 [Name: anchored component of membrane]	GO:0003674 [Name: molecular_function]	-
AT3G10340.1	3	3204013	3208022	+	PAL4	phenylalanine ammonia-lyase 4	3008	474	1843	1192	1828	1338	1521.52	0.468	-1.095	-5.877	4.18297e-09	6.555e-07	0.0298	0.0147	0.0242	0.0242	TRUE	0.1593	GO:0009800 [Name: cinnamic acid biosynthetic process]; GO:0006559 [Name: L-phenylalanine catabolic process]	GO:0005737 [Name: cytoplasm]	GO:0016841 [Name: ammonia-lyase activity]; GO:0045548 [Name: phenylalanine ammonia-lyase activity]	ath00360 [Pathway Title: Phenylalanine metabolism]; ath01100 [Pathway Title: Metabolic pathways]; ath00940 [Pathway Title: Phenylpropanoid biosynthesis]; ath01110 [Pathway Title: Biosynthesis of secondary metabolites]
AT4G36220.1	4	17137344	17139635	-	CYP84A1	ferulic acid 5-hydroxylase 1	1815	272	1128	720	1116	774	906.25	0.468	-1.096	-6.052	1.42828e-09	2.54341e-07	0.0235	0.0188	0.0223	0.0223	TRUE	0.2429	GO:0009699 [Name: phenylpropanoid biosynthetic process]; GO:0010224 [Name: response to UV-B]; GO:0009809 [Name: lignin biosynthetic process]	GO:0016021 [Name: integral component of membrane]; GO:0005886 [Name: plasma membrane]; GO:0005783 [Name: endoplasmic reticulum]	GO:0020037 [Name: heme binding]; GO:0016705 [Name: oxidoreductase activity acting on paired donors with incorporation or reduction of molecular oxygen]; GO:0004497 [Name: monooxygenase activity]; GO:0005506 [Name: iron ion binding]	ath01110 [Pathway Title: Biosynthesis of secondary metabolites]; ath01100 [Pathway Title: Metabolic pathways]; ath00940 [Pathway Title: Phenylpropanoid biosynthesis]
AT1G76890.2	1	28873059	28875292	-	GT-2	Duplicated homeodomain-like superfamily protein	213	35	187	97	161	101	122.42	0.466	-1.103	-5.065	4.08844e-07	3.84412e-05	0	0.0833	0.0248	0.0248	TRUE	0.1001	GO:0015994 [Name: chlorophyll metabolic process]; GO:0006355 [Name: regulation of transcription DNA-templated]; GO:0009617 [Name: response to bacterium]; GO:0009314 [Name: response to radiation]; GO:0040007 [Name: growth]	GO:0005634 [Name: nucleus]	GO:0003677 [Name: DNA binding]; GO:0003700 [Name: transcription factor activity sequence-specific DNA binding]	-
AT3G14870.3	3	5003926	5005739	+	AT3G14870	hypothetical protein (DUF641)	72	14	78	50	57	29	46.9	0.464	-1.108	-2.983	0.00285467	0.048267	0.0171	0.2034	0.0748	0.0748	TRUE	0.445	GO:0009639 [Name: response to red or far red light]; GO:0009959 [Name: negative gravitropism]	-	GO:0003674 [Name: molecular_function]	-
AT5G63850.1	5	25551055	25553520	+	AAP4	amino acid permease 4	370	124	332	205	376	222	278.82	0.464	-1.108	-3.997	6.41405e-05	0.00248383	0.0568	0.0414	0.0508	0.0508	TRUE	1.2048	GO:0006865 [Name: amino acid transport]	GO:0005886 [Name: plasma membrane]; GO:0016021 [Name: integral component of membrane]	GO:0015175 [Name: neutral amino acid transmembrane transporter activity]; GO:0015293 [Name: symporter activity]; GO:0015172 [Name: acidic amino acid transmembrane transporter activity]; GO:0015399 [Name: primary active transmembrane transporter activity]	-
AT4G15430.2	4	8827876	8831504	+	AT4G15430	ERD (early-responsive to dehydration stress) family protein	160	20	119	75	99	62	80.62	0.464	-1.109	-3.839	0.000123499	0.0042259	0.012	0.122	0.0459	0.0459	TRUE	0.1098	GO:0009639 [Name: response to red or far red light]; GO:0019438 [Name: aromatic compound biosynthetic process]; GO:0019748 [Name: secondary metabolic process]; GO:0009891 [Name: positive regulation of biosynthetic process]; GO:0048507 [Name: meristem development]; GO:1903046 [Name: meiotic cell cycle process]; GO:0009637 [Name: response to blue light]; GO:0080090 [Name: regulation of primary meta…	GO:0005886 [Name: plasma membrane]; GO:0016021 [Name: integral component of membrane]	GO:0005227 [Name: calcium activated cation channel activity]	-
AT5G01810.1	5	309715	312097	+	CIPK15	CBL-interacting protein kinase 15	205	33	181	79	171	98	116.98	0.463	-1.11	-4.538	5.69125e-06	0.000348382	0.0059	0.0868	0.0332	0.0332	TRUE	0.2554	GO:0009788 [Name: negative regulation of abscisic acid-activated signaling pathway]; GO:0009738 [Name: abscisic acid-activated signaling pathway]	GO:0005886 [Name: plasma membrane]; GO:0005634 [Name: nucleus]	GO:0004712 [Name: protein serine/threonine/tyrosine kinase activity]; GO:0004674 [Name: protein serine/threonine kinase activity]; GO:0005524 [Name: ATP binding]; GO:0004672 [Name: protein kinase activity]	-
AT3G53720.1	3	19905678	19910112	-	CHX20	cation/H+ exchanger 20	284	60	236	137	214	141	172.84	0.462	-1.113	-5.484	4.16518e-08	5.09931e-06	0.0054	0.0615	0.0228	0.0228	TRUE	0.1355	GO:0006813 [Name: potassium ion transport]; GO:0006885 [Name: regulation of pH]; GO:0030007 [Name: cellular potassium ion homeostasis]; GO:0030104 [Name: water homeostasis]; GO:0006623 [Name: protein targeting to vacuole]	GO:0016021 [Name: integral component of membrane]; GO:0005783 [Name: endoplasmic reticulum]; GO:0012505 [Name: endomembrane system]	GO:0015299 [Name: solute:proton antiporter activity]	-
AT1G72220.1	1	27184281	27185830	-	ATL54	RING/U-box superfamily protein	356	60	248	129	246	172	190.16	0.462	-1.114	-4.666	3.0757e-06	0.00020835	0.0237	0.0567	0.0347	0.0347	TRUE	0.4583	GO:0016567 [Name: protein ubiquitination]	GO:0016021 [Name: integral component of membrane]	GO:0016740 [Name: transferase activity]; GO:0046872 [Name: metal ion binding]	-
AT5G16570.1	5	5421743	5424566	-	GLN1-4	glutamine synthetase 1;4	1297	323	1029	619	982	738	829.95	0.462	-1.114	-5.262	1.4247e-07	1.51534e-05	0.0409	0.0197	0.0308	0.0308	TRUE	0.477	GO:0006542 [Name: glutamine biosynthetic process]; GO:0042128 [Name: nitrate assimilation]	GO:0005737 [Name: cytoplasm]; GO:0005829 [Name: cytosol]; GO:0009536 [Name: plastid]	GO:0004356 [Name: glutamate-ammonia ligase activity]; GO:0005524 [Name: ATP binding]	ath00910 [Pathway Title: Nitrogen metabolism]; ath00630 [Pathway Title: Glyoxylate and dicarboxylate metabolism]; ath00220 [Pathway Title: Arginine biosynthesis]; ath00250 [Pathway Title: Alanine aspartate and glutamate metabolism]; ath01100 [Pathway Title: Metabolic pathways]; ath01230 [Pathway Title: Biosynthesis of amino acids]
AT4G01070.1	4	461592	463449	-	UGT72B1	UDP-Glycosyltransferase superfamily protein	1551	348	1222	797	1141	760	950.81	0.462	-1.115	-6.874	6.22743e-12	2.21791e-09	0.0176	0.0183	0.0176	0.0176	TRUE	0.2409	GO:0009809 [Name: lignin biosynthetic process]; GO:0006805 [Name: xenobiotic metabolic process]; GO:0009636 [Name: response to toxic substance]; GO:0042178 [Name: xenobiotic catabolic process]	GO:0009507 [Name: chloroplast]	GO:0035251 [Name: UDP-glucosyltransferase activity]; GO:0050505 [Name: hydroquinone glucosyltransferase activity]; GO:0008194 [Name: UDP-glycosyltransferase activity]	-
AT5G51670.1	5	20993537	20995644	+	AT5G51670	hypothetical protein (DUF668)	65	15	70	32	55	39	44.46	0.46	-1.12	-3.072	0.00212491	0.0387495	0	0.2141	0.0696	0.0696	TRUE	0.2378	GO:0045927 [Name: positive regulation of growth]	GO:0005739 [Name: mitochondrion]	-	-
AT5G11950.1	5	3854968	3856983	+	LOG8	Putative lysine decarboxylase family protein	207	47	112	75	126	114	114.96	0.458	-1.126	-2.986	0.00282743	0.0481256	0.0914	0.0881	0.0915	0.0915	TRUE	0.2463	GO:0009691 [Name: cytokinin biosynthetic process]	GO:0005829 [Name: cytosol]; GO:0005634 [Name: nucleus]; GO:0005886 [Name: plasma membrane]	GO:0042803 [Name: protein homodimerization activity]; GO:0016799 [Name: hydrolase activity hydrolyzing N-glycosyl compounds]	-
AT1G76878.1	1	28866404	28867969	-	AT1G76878		96	23	88	63	90	30	62.56	0.456	-1.132	-3.149	0.00163742	0.0319147	0.0307	0.1547	0.0738	0.0738	TRUE	0.5726	-	-	-	-
AT1G16410.1	1	5608807	5611426	+	CYP79F1	cytochrome p450 79f1	1322	275	985	697	734	666	772.66	0.456	-1.134	-4.847	1.25473e-06	9.76611e-05	0.0494	0.0205	0.0378	0.0378	TRUE	0.489	GO:0019761 [Name: glucosinolate biosynthetic process]; GO:0009625 [Name: response to insect]	GO:0016021 [Name: integral component of membrane]; GO:0005634 [Name: nucleus]; GO:0005789 [Name: endoplasmic reticulum membrane]; GO:0005783 [Name: endoplasmic reticulum]; GO:0016020 [Name: membrane]	GO:0020037 [Name: heme binding]; GO:0103096 [Name: CYP79F1 dihomomethionine monooxygenase activity]; GO:0103097 [Name: CYP79F1 trihomomethionine monooxygenase activity]; GO:0005506 [Name: iron ion binding]; GO:0016709 [Name: oxidoreductase activity acting on paired donors with incorporation or reduction of molecular oxygen NAD(P)H as one donor and incorporation of one atom of oxygen]	ath00966 [Pathway Title: Glucosinolate biosynthesis]; ath01210 [Pathway Title: 2-Oxocarboxylic acid metabolism]; ath01110 [Pathway Title: Biosynthesis of secondary metabolites]
AT1G76410.1	1	28668848	28669646	+	ATL8	RING/U-box superfamily protein	198	52	155	84	188	94	126.97	0.454	-1.138	-4.168	3.07039e-05	0.0013695	0.0262	0.0806	0.0441	0.0441	TRUE	0.3631	GO:0016567 [Name: protein ubiquitination]	GO:0016021 [Name: integral component of membrane]	GO:0046872 [Name: metal ion binding]; GO:0016740 [Name: transferase activity]	-
AT3G50840.1	3	18896175	18898621	-	AT3G50840	Phototropic-responsive NPH3 family protein	125	22	105	63	80	58	71.67	0.454	-1.139	-3.917	8.96566e-05	0.00328266	0	0.1361	0.0448	0.0448	TRUE	0.3024	GO:0016567 [Name: protein ubiquitination]	GO:0005634 [Name: nucleus]	-	-
AT1G67195.1	1	25137111	25137937	-	MIR414		223	62	164	109	180	110	143.54	0.452	-1.144	-4.232	2.31235e-05	0.00108805	0.029	0.0723	0.0441	0.0441	TRUE	0.458	-	-	-	-
AT4G09990.1	4	6258880	6260073	-	GXM2	glucuronoxylan 4-O-methyltransferase-like protein (DUF579)	305	49	239	111	237	134	165.33	0.452	-1.145	-5.323	1.02287e-07	1.13951e-05	0.0079	0.0639	0.0262	0.0262	TRUE	0.2354	GO:0032259 [Name: methylation]; GO:0045492 [Name: xylan biosynthetic process]; GO:0009834 [Name: plant-type secondary cell wall biogenesis]; GO:0045491 [Name: xylan metabolic process]	GO:0000139 [Name: Golgi membrane]; GO:0016021 [Name: integral component of membrane]; GO:0005794 [Name: Golgi apparatus]	GO:0030775 [Name: glucuronoxylan 4-O-methyltransferase activity]	-
AT1G74940.1	1	28146059	28147378	+	AT1G74940	cyclin-dependent kinase putative (DUF581)	249	48	187	101	195	106	140.5	0.449	-1.156	-5.464	4.65028e-08	5.52069e-06	0	0.0737	0.0239	0.0239	TRUE	0.1012	GO:1902074 [Name: response to salt]; GO:0071456 [Name: cellular response to hypoxia]	GO:0005829 [Name: cytosol]; GO:0005634 [Name: nucleus]	GO:0019900 [Name: kinase binding]; GO:0046872 [Name: metal ion binding]	-
AT2G37750.1	2	15830989	15831558	+	AT2G37750	uncharacterized protein	272	54	232	130	184	132	161.24	0.449	-1.157	-5.517	3.44569e-08	4.33126e-06	0.0064	0.0653	0.0244	0.0244	TRUE	0.207	GO:0009414 [Name: response to water deprivation]; GO:0048878 [Name: chemical homeostasis]; GO:0006970 [Name: response to osmotic stress]; GO:0010150 [Name: leaf senescence]; GO:0009620 [Name: response to fungus]; GO:1901361 [Name: organic cyclic compound catabolic process]; GO:0044248 [Name: cellular catabolic process]; GO:1901565 [Name: organonitrogen compound catabolic process]	GO:0005575 [Name: cellular_component]	GO:0003674 [Name: molecular_function]	-
AT1G29050.1	1	10136230	10139208	-	TBL38	TRICHOME BIREFRINGENCE-LIKE 38	2733	470	2383	1288	1918	1199	1563.41	0.448	-1.16	-11.106	1.17066e-28	3.05751e-25	0.0041	0.0145	0.0071	0.0071	TRUE	0.0886	GO:0048316 [Name: seed development]; GO:0033993 [Name: response to lipid]; GO:0044085 [Name: cellular component biogenesis]; GO:0090558 [Name: plant epidermis development]; GO:0050832 [Name: defense response to fungus]; GO:0031347 [Name: regulation of defense response]; GO:0036211 [Name: protein modification process]; GO:0071669 [Name: plant-type cell wall organization or biogenesis]; GO:0009059 …	GO:0016021 [Name: integral component of membrane]; GO:0005794 [Name: Golgi apparatus]	GO:0016413 [Name: O-acetyltransferase activity]	-
AT1G11080.2	1	3694672	3697808	-	SCPL31	serine carboxypeptidase-like 31	271	55	193	163	176	89	153.58	0.447	-1.161	-4.1	4.1265e-05	0.00175086	0.0392	0.0682	0.0497	0.0497	TRUE	0.7823	-	GO:0005576 [Name: extracellular region]	GO:0004185 [Name: serine-type carboxypeptidase activity]	-
AT5G16240.1	5	5306807	5309932	+	S-ACP-DES1	Plant stearoyl-acyl-carrier-protein desaturase family protein	130	30	135	73	94	71	87.06	0.447	-1.162	-4.043	5.27501e-05	0.00214523	0.0164	0.1136	0.0458	0.0458	TRUE	0.334	GO:0006631 [Name: fatty acid metabolic process]; GO:0006633 [Name: fatty acid biosynthetic process]	GO:0009507 [Name: chloroplast]	GO:0046872 [Name: metal ion binding]; GO:0045300 [Name: acyl-[acyl-carrier-protein] desaturase activity]	ath01212 [Pathway Title: Fatty acid metabolism]; ath00061 [Pathway Title: Fatty acid biosynthesis]; ath01040 [Pathway Title: Biosynthesis of unsaturated fatty acids]
AT4G32940.1	4	15900270	15903268	-	GAMMA-VPE	gamma vacuolar processing enzyme	6189	963	5093	2879	4312	2368	3362.27	0.446	-1.165	-11.997	3.70374e-33	2.80988e-29	0.0044	0.0114	0.0064	0.0064	TRUE	0.066	GO:0051603 [Name: proteolysis involved in cellular protein catabolic process]; GO:0009753 [Name: response to jasmonic acid]; GO:0006624 [Name: vacuolar protein processing]; GO:0010150 [Name: leaf senescence]; GO:0009723 [Name: response to ethylene]; GO:0009751 [Name: response to salicylic acid]; GO:0009611 [Name: response to wounding]	GO:0000326 [Name: protein storage vacuole]; GO:0000323 [Name: lytic vacuole]	GO:0004197 [Name: cysteine-type endopeptidase activity]; GO:0004175 [Name: endopeptidase activity]	-
AT3G57400.1	3	21238433	21240228	+	AT3G57400	uncharacterized protein	170	47	153	92	148	80	115.5	0.444	-1.171	-4.553	5.28504e-06	0.000331006	0.0131	0.0878	0.0372	0.0372	TRUE	0.3365	GO:0009059 [Name: macromolecule biosynthetic process]; GO:0043170 [Name: macromolecule metabolic process]; GO:0048646 [Name: anatomical structure formation involved in morphogenesis]; GO:0009606 [Name: tropism]; GO:0009832 [Name: plant-type cell wall biogenesis]; GO:0006914 [Name: autophagy]	GO:0016021 [Name: integral component of membrane]	GO:0003674 [Name: molecular_function]	-
AT5G49630.1	5	20142470	20146498	-	AAP6	amino acid permease 6	520	106	460	264	429	203	314.3	0.444	-1.172	-8.081	6.42504e-16	3.59588e-13	0	0.0378	0.0114	0.0114	TRUE	0.046	GO:0015810 [Name: aspartate transport]; GO:0015827 [Name: tryptophan transport]; GO:0006865 [Name: amino acid transport]	GO:0016021 [Name: integral component of membrane]; GO:0005886 [Name: plasma membrane]	GO:0015175 [Name: neutral amino acid transmembrane transporter activity]; GO:0015172 [Name: acidic amino acid transmembrane transporter activity]; GO:0015293 [Name: symporter activity]	-
AT1G04040.1	1	1042362	1043864	-	AT1G04040	HAD superfamily subfamily IIIB acid phosphatase	167	27	133	71	115	71	90.81	0.443	-1.174	-4.798	1.60587e-06	0.000120272	0	0.1093	0.0305	0.0305	TRUE	0.061	GO:0009888 [Name: tissue development]; GO:0010468 [Name: regulation of gene expression]; GO:0043436 [Name: oxoacid metabolic process]; GO:0010035 [Name: response to inorganic substance]; GO:0010015 [Name: root morphogenesis]; GO:0048589 [Name: developmental growth]	GO:0009505 [Name: plant-type cell wall]; GO:0000325 [Name: plant-type vacuole]; GO:0005576 [Name: extracellular region]; GO:0009506 [Name: plasmodesma]; GO:0005773 [Name: vacuole]	GO:0003993 [Name: acid phosphatase activity]; GO:0045735 [Name: nutrient reservoir activity]	-
AT5G38430.1	5	15384117	15385247	-	RBCS-1B	Ribulose bisphosphate carboxylase (small chain) family protein	2439	384	2442	1136	1885	1022	1422.47	0.442	-1.177	-8.69	3.62081e-18	3.27349e-15	0.0113	0.0151	0.0123	0.0123	TRUE	0.106	GO:0019253 [Name: reductive pentose-phosphate cycle]; GO:0009853 [Name: photorespiration]; GO:0015977 [Name: carbon fixation]; GO:0015979 [Name: photosynthesis]	GO:0009507 [Name: chloroplast]; GO:0048046 [Name: apoplast]; GO:0009941 [Name: chloroplast envelope]; GO:0009579 [Name: thylakoid]; GO:0009536 [Name: plastid]; GO:0009570 [Name: chloroplast stroma]	GO:0019904 [Name: protein domain specific binding]; GO:0003729 [Name: mRNA binding]	ath01100 [Pathway Title: Metabolic pathways]; ath00630 [Pathway Title: Glyoxylate and dicarboxylate metabolism]; ath01200 [Pathway Title: Carbon metabolism]; ath00710 [Pathway Title: Carbon fixation in photosynthetic organisms]
AT1G55960.1	1	20927643	20930017	-	AT1G55960	Polyketide cyclase/dehydrase and lipid transport superfamily protein	291	53	286	136	207	147	176.52	0.442	-1.179	-5.555	2.77122e-08	3.63912e-06	0.0101	0.0604	0.0257	0.0257	TRUE	0.2361	GO:0009651 [Name: response to salt stress]; GO:0006970 [Name: response to osmotic stress]	GO:0016021 [Name: integral component of membrane]	GO:0008289 [Name: lipid binding]	-
AT2G30600.3	2	13037213	13041684	+	AT2G30600	BTB/POZ domain-containing protein	579	107	542	275	500	225	345.7	0.442	-1.179	-8.316	9.11138e-17	6.49006e-14	0	0.0351	0.0111	0.0111	TRUE	0.0567	GO:0016567 [Name: protein ubiquitination]	GO:0005634 [Name: nucleus]; GO:0005737 [Name: cytoplasm]	GO:0003674 [Name: molecular_function]	-
AT5G67540.2	5	26944028	26946365	-	AT5G67540	Arabinanase/levansucrase/invertase	121	27	79	61	95	38	68.76	0.44	-1.184	-3.533	0.000411216	0.0109468	0.0254	0.1415	0.0633	0.0633	TRUE	0.1154	GO:0005975 [Name: carbohydrate metabolic process]; GO:0010406 [Name: classical arabinogalactan protein metabolic process]	GO:0005794 [Name: Golgi apparatus]; GO:0016021 [Name: integral component of membrane]	GO:0004565 [Name: beta-galactosidase activity]	-
AT3G62150.1	3	23008755	23013909	-	ABCB21	P-glycoprotein 21	135	23	110	58	85	64	75.15	0.44	-1.185	-4.097	4.19321e-05	0.00177276	0	0.1302	0.0447	0.0447	TRUE	0.2624	GO:0055085 [Name: transmembrane transport]; GO:0010315 [Name: auxin efflux]; GO:0060919 [Name: auxin influx]	GO:0016021 [Name: integral component of membrane]; GO:0005886 [Name: plasma membrane]; GO:0000325 [Name: plant-type vacuole]; GO:0005829 [Name: cytosol]	GO:0042626 [Name: ATPase activity coupled to transmembrane movement of substances]; GO:0010328 [Name: auxin influx transmembrane transporter activity]; GO:0005524 [Name: ATP binding]; GO:0010329 [Name: auxin efflux transmembrane transporter activity]	ath02010 [Pathway Title: ABC transporters]
AT3G52060.1	3	19310532	19312286	-	AT3G52060	core-2/I-branching beta-16-N-acetylglucosaminyltransferase family protein	277	73	204	112	234	139	174.42	0.439	-1.187	-4.299	1.71836e-05	0.000850355	0.0402	0.0611	0.0478	0.0478	TRUE	0.3695	GO:0009611 [Name: response to wounding]; GO:0009755 [Name: hormone-mediated signaling pathway]; GO:0048367 [Name: shoot system development]; GO:1901605 [Name: alpha-amino acid metabolic process]; GO:0065003 [Name: macromolecular complex assembly]; GO:0019761 [Name: glucosinolate biosynthetic process]; GO:1901565 [Name: organonitrogen compound catabolic process]; GO:0009642 [Name: response to ligh…	GO:0016020 [Name: membrane]; GO:0009506 [Name: plasmodesma]	GO:0016757 [Name: transferase activity transferring glycosyl groups]	-
AT3G27170.1	3	10024017	10027198	+	CLC-B	chloride channel B	211	55	213	141	151	99	145.45	0.438	-1.191	-4.332	1.48065e-05	0.000758258	0.0332	0.0715	0.046	0.046	TRUE	0.271	GO:0006821 [Name: chloride transport]; GO:0034765 [Name: regulation of ion transmembrane transport]	GO:0016021 [Name: integral component of membrane]; GO:0034707 [Name: chloride channel complex]; GO:0043231 [Name: intracellular membrane-bounded organelle]; GO:0009705 [Name: plant-type vacuole membrane]	GO:0005247 [Name: voltage-gated chloride channel activity]; GO:0009671 [Name: nitrate:proton symporter activity]	-
AT3G13730.1	3	4497976	4500920	-	CYP90D1	cytochrome P450 family 90 subfamily D polypeptide 1	397	73	270	162	249	173	213.22	0.438	-1.192	-5.541	3.0106e-08	3.84604e-06	0.0166	0.0515	0.0276	0.0276	TRUE	0.2364	GO:0048443 [Name: stamen development]; GO:0010268 [Name: brassinosteroid homeostasis]; GO:0016132 [Name: brassinosteroid biosynthetic process]; GO:0048366 [Name: leaf development]; GO:0016125 [Name: sterol metabolic process]; GO:0048441 [Name: petal development]	GO:0016021 [Name: integral component of membrane]; GO:0005789 [Name: endoplasmic reticulum membrane]	GO:0004497 [Name: monooxygenase activity]; GO:0102136 [Name: 3-epi-6-deoxocathasterone C-23 hydroxylase activity]; GO:0020037 [Name: heme binding]; GO:0005506 [Name: iron ion binding]; GO:0016491 [Name: oxidoreductase activity]; GO:0016709 [Name: oxidoreductase activity acting on paired donors with incorporation or reduction of molecular oxygen NAD(P)H as one donor and incorporation of one atom o…	ath00905 [Pathway Title: Brassinosteroid biosynthesis]; ath01110 [Pathway Title: Biosynthesis of secondary metabolites]; ath01100 [Pathway Title: Metabolic pathways]
AT2G43060.1	2	17909185	17910082	+	IBH1	ILI1 binding bHLH 1	515	152	353	186	429	306	334.92	0.437	-1.195	-3.612	0.000303502	0.0086265	0.1033	0.036	0.075	0.075	TRUE	0.4485	GO:0040008 [Name: regulation of growth]; GO:0009740 [Name: gibberellic acid mediated signaling pathway]; GO:0009742 [Name: brassinosteroid mediated signaling pathway]	GO:0005634 [Name: nucleus]	GO:0046983 [Name: protein dimerization activity]; GO:0000976 [Name: transcription regulatory region sequence-specific DNA binding]; GO:0003700 [Name: transcription factor activity sequence-specific DNA binding]	-
AT1G72200.1	1	27169795	27171321	-	ATL11	RING/U-box superfamily protein	226	51	194	121	143	109	139.78	0.436	-1.197	-4.693	2.69382e-06	0.000188455	0.0212	0.074	0.0381	0.0381	TRUE	0.4535	GO:0016567 [Name: protein ubiquitination]	GO:0016021 [Name: integral component of membrane]	GO:0016740 [Name: transferase activity]; GO:0046872 [Name: metal ion binding]	-
AT5G56870.1	5	23004196	23008649	+	BGAL4	beta-galactosidase 4	3422	510	2716	1299	1891	1639	1800.39	0.436	-1.197	-5.929	3.04442e-09	5.03958e-07	0.0408	0.0138	0.0287	0.0287	TRUE	0.8528	GO:0005975 [Name: carbohydrate metabolic process]	GO:0005773 [Name: vacuole]; GO:0009536 [Name: plastid]; GO:0048046 [Name: apoplast]	GO:0004565 [Name: beta-galactosidase activity]	-
AT1G59740.1	1	21968071	21972411	+	NPF4.3	Major facilitator superfamily protein	196	27	117	85	102	67	92.5	0.435	-1.2	-3.965	7.32788e-05	0.00276928	0.0294	0.1074	0.0531	0.0531	TRUE	0.4877	GO:0006857 [Name: oligopeptide transport]; GO:0009624 [Name: response to nematode]	GO:0016021 [Name: integral component of membrane]	GO:0022857 [Name: transmembrane transporter activity]	-
AT4G23496.1	4	12257676	12258411	-	SP1L5	SPIRAL1-like5	432	73	340	169	283	195	234.99	0.435	-1.201	-6.324	2.55036e-10	5.60268e-08	0.0084	0.0476	0.0209	0.0209	TRUE	0.2585	GO:0043622 [Name: cortical microtubule organization]	GO:0010005 [Name: cortical microtubule transverse to long axis]	GO:0003674 [Name: molecular_function]	-
AT3G50560.1	3	18761088	18764016	-	AT3G50560	NAD(P)-binding Rossmann-fold superfamily protein	135	32	118	64	95	69	85.14	0.434	-1.205	-4.263	2.01509e-05	0.000976633	0.0103	0.116	0.0435	0.0435	TRUE	0.209	GO:0009416 [Name: response to light stimulus]; GO:0040007 [Name: growth]	GO:0016021 [Name: integral component of membrane]	GO:0016491 [Name: oxidoreductase activity]	-
AT1G71970.1	1	27093028	27094027	+	AT1G71970	uncharacterized protein	172	29	123	58	125	72	90.62	0.434	-1.206	-4.428	9.51532e-06	0.000540365	0	0.1095	0.0404	0.0404	TRUE	0.2308	GO:0007165 [Name: signal transduction]; GO:0009888 [Name: tissue development]; GO:0009059 [Name: macromolecule biosynthetic process]; GO:0033993 [Name: response to lipid]; GO:0071310 [Name: cellular response to organic substance]; GO:0009642 [Name: response to light intensity]; GO:0065003 [Name: macromolecular complex assembly]	GO:0005634 [Name: nucleus]	GO:0003674 [Name: molecular_function]	-
AT3G28840.1	3	10838409	10839946	+	AT3G28840	hypothetical protein (DUF1216)	158	28	126	63	116	66	87.61	0.433	-1.209	-4.901	9.53101e-07	7.72537e-05	0	0.1129	0.0306	0.0306	TRUE	0.0479	GO:0097305 [Name: response to alcohol]	GO:0005576 [Name: extracellular region]	GO:0003674 [Name: molecular_function]	-
AT1G77330.1	1	29062990	29064537	-	AT1G77330	2-oxoglutarate (2OG) and Fe(II)-dependent oxygenase superfamily protein	164	32	154	71	120	81	99.16	0.432	-1.211	-4.868	1.12949e-06	8.96951e-05	0	0.1008	0.0327	0.0327	TRUE	0.202	GO:0009693 [Name: ethylene biosynthetic process]; GO:0006952 [Name: defense response]	GO:0005737 [Name: cytoplasm]	GO:0031418 [Name: L-ascorbic acid binding]; GO:0051213 [Name: dioxygenase activity]; GO:0009815 [Name: 1-aminocyclopropane-1-carboxylate oxidase activity]; GO:0046872 [Name: metal ion binding]; GO:0016491 [Name: oxidoreductase activity]	ath00270 [Pathway Title: Cysteine and methionine metabolism]; ath01110 [Pathway Title: Biosynthesis of secondary metabolites]; ath01100 [Pathway Title: Metabolic pathways]
AT4G22680.1	4	11922340	11924216	-	MYB85	myb domain protein 85	150	47	114	65	117	89	102.22	0.431	-1.213	-3.344	0.000826326	0.0190055	0.0735	0.098	0.0824	0.0824	TRUE	0.8666	GO:0030154 [Name: cell differentiation]; GO:2000762 [Name: regulation of phenylpropanoid metabolic process]; GO:1901141 [Name: regulation of lignin biosynthetic process]; GO:2000652 [Name: regulation of secondary cell wall biogenesis]; GO:0009094 [Name: L-phenylalanine biosynthetic process]; GO:0045893 [Name: positive regulation of transcription DNA-templated]	GO:0005634 [Name: nucleus]	GO:0000976 [Name: transcription regulatory region sequence-specific DNA binding]; GO:0003700 [Name: transcription factor activity sequence-specific DNA binding]	-
AT3G04210.1	3	1105963	1108069	-	AT3G04210	Disease resistance protein (TIR-NBS class)	531	119	596	298	513	206	357.53	0.43	-1.217	-6.385	1.71511e-10	3.91412e-08	0.0172	0.0342	0.0227	0.0227	TRUE	0.2228	GO:0006952 [Name: defense response]; GO:0007165 [Name: signal transduction]; GO:0045087 [Name: innate immune response]	GO:0016021 [Name: integral component of membrane]	GO:0003953 [Name: NAD+ nucleosidase activity]; GO:0043531 [Name: ADP binding]	-
AT5G20250.1	5	6833659	6836782	+	RFS6	Raffinose synthase family protein	120	21	102	39	69	71	67.81	0.43	-1.219	-3.076	0.00209803	0.0384682	0.0708	0.1434	0.095	0.095	TRUE	1.5382	GO:0005975 [Name: carbohydrate metabolic process]	GO:0009507 [Name: chloroplast]; GO:0009506 [Name: plasmodesma]; GO:0005829 [Name: cytosol]; GO:0005737 [Name: cytoplasm]	GO:0047274 [Name: galactinol-sucrose galactosyltransferase activity]	ath00052 [Pathway Title: Galactose metabolism]
AT3G52370.1	3	19417490	19419782	+	FLA15	FASCICLIN-like arabinogalactan protein 15 precursor	261	76	233	101	221	163	180.03	0.429	-1.221	-3.844	0.000121229	0.00417221	0.0694	0.0594	0.0656	0.0656	TRUE	0.8255	GO:0009059 [Name: macromolecule biosynthetic process]; GO:0042546 [Name: cell wall biogenesis]; GO:0071669 [Name: plant-type cell wall organization or biogenesis]; GO:0009813 [Name: flavonoid biosynthetic process]; GO:0009812 [Name: flavonoid metabolic process]; GO:0043436 [Name: oxoacid metabolic process]	GO:0005576 [Name: extracellular region]	-	-
AT3G26170.1	3	9573360	9575148	-	CYP71B19	cytochrome P450 family 71 subfamily B polypeptide 19	112	11	85	49	77	27	52.25	0.428	-1.223	-3.084	0.00204054	0.0377677	0.0393	0.1835	0.0908	0.0908	TRUE	0.2456	GO:1901565 [Name: organonitrogen compound catabolic process]; GO:0033993 [Name: response to lipid]; GO:0051254 [Name: positive regulation of RNA metabolic process]; GO:0046777 [Name: protein autophosphorylation]; GO:0009620 [Name: response to fungus]; GO:0044248 [Name: cellular catabolic process]; GO:0009414 [Name: response to water deprivation]	GO:0016021 [Name: integral component of membrane]	GO:0020037 [Name: heme binding]; GO:0005506 [Name: iron ion binding]; GO:0004497 [Name: monooxygenase activity]; GO:0016705 [Name: oxidoreductase activity acting on paired donors with incorporation or reduction of molecular oxygen]	ath00903 [Pathway Title: Limonene and pinene degradation]; ath00945 [Pathway Title: Stilbenoid diarylheptanoid and gingerol biosynthesis]; ath01100 [Pathway Title: Metabolic pathways]; ath01110 [Pathway Title: Biosynthesis of secondary metabolites]
AT3G55990.1	3	20780315	20783233	+	ESK1	trichome birefringence-like protein (DUF828)	1637	272	1267	614	1071	717	878.65	0.428	-1.223	-8.139	3.99197e-16	2.28867e-13	0.0127	0.0191	0.0148	0.0148	TRUE	0.2977	GO:0045893 [Name: positive regulation of transcription DNA-templated]; GO:0009409 [Name: response to cold]; GO:0050826 [Name: response to freezing]; GO:0045492 [Name: xylan biosynthetic process]	GO:0005794 [Name: Golgi apparatus]; GO:0016021 [Name: integral component of membrane]; GO:0000139 [Name: Golgi membrane]	GO:1990538 [Name: xylan O-acetyltransferase activity]; GO:0016413 [Name: O-acetyltransferase activity]	-
AT1G78020.1	1	29338693	29339755	+	AT1G78020	senescence-associated family protein putative (DUF581)	1545	477	1261	691	1280	910	1066.4	0.428	-1.224	-4.758	1.95635e-06	0.000142813	0.0692	0.0173	0.0465	0.0465	TRUE	1.2501	GO:0042594 [Name: response to starvation]; GO:0090351 [Name: seedling development]	GO:0005829 [Name: cytosol]; GO:0005783 [Name: endoplasmic reticulum]; GO:0005737 [Name: cytoplasm]; GO:0005634 [Name: nucleus]	GO:0046872 [Name: metal ion binding]; GO:0019900 [Name: kinase binding]	-
AT1G75030.1	1	28174378	28175383	+	ATLP-3	thaumatin-like protein 3	75	17	78	34	85	24	48.82	0.426	-1.232	-3.103	0.00191543	0.0358758	0.0399	0.1957	0.0891	0.0891	TRUE	0.9029	GO:0006952 [Name: defense response]	GO:0005576 [Name: extracellular region]	GO:0003674 [Name: molecular_function]	-
AT5G38710.1	5	15501245	15504109	+	POX2	Methylenetetrahydrofolate reductase family protein	120	44	163	72	116	86	104.03	0.425	-1.235	-3.537	0.000404852	0.0108371	0.0646	0.0965	0.0757	0.0757	TRUE	0.1438	GO:0006562 [Name: proline catabolic process]; GO:0009414 [Name: response to water deprivation]; GO:0010133 [Name: proline catabolic process to glutamate]; GO:0006970 [Name: response to osmotic stress]	GO:0005739 [Name: mitochondrion]	GO:0071949 [Name: FAD binding]; GO:0004657 [Name: proline dehydrogenase activity]	ath01110 [Pathway Title: Biosynthesis of secondary metabolites]; ath01100 [Pathway Title: Metabolic pathways]; ath00330 [Pathway Title: Arginine and proline metabolism]; ath01130 [Pathway Title: Biosynthesis of antibiotics]
AT5G03120.1	5	733979	734943	+	AT5G03120	uncharacterized protein	59	10	67	29	50	24	36.59	0.424	-1.238	-3.171	0.00151953	0.0300404	0	0.2583	0.0786	0.0786	TRUE	0.3677	GO:0033993 [Name: response to lipid]; GO:0040007 [Name: growth]	GO:0016021 [Name: integral component of membrane]	GO:0003674 [Name: molecular_function]	-
AT1G73140.1	1	27502133	27503819	-	TBL31	trichome birefringence-like protein (DUF828)	84	25	97	49	74	44	62.82	0.424	-1.239	-3.77	0.000163127	0.00522407	0.0181	0.1541	0.0585	0.0585	TRUE	0.1274	GO:0045492 [Name: xylan biosynthetic process]	GO:0016021 [Name: integral component of membrane]; GO:0005794 [Name: Golgi apparatus]	GO:1990538 [Name: xylan O-acetyltransferase activity]; GO:0016413 [Name: O-acetyltransferase activity]	-
AT4G16980.1	4	9556978	9557812	+	AT4G16980	arabinogalactan-protein family	573	86	552	230	478	205	320.63	0.421	-1.247	-6.47	9.76881e-11	2.34312e-08	0.0152	0.0372	0.0229	0.0229	TRUE	0.1358	GO:0048589 [Name: developmental growth]; GO:0009409 [Name: response to cold]; GO:0009266 [Name: response to temperature stimulus]; GO:0009642 [Name: response to light intensity]; GO:0030154 [Name: cell differentiation]; GO:0051234 [Name: establishment of localization]	-	-	-
AT2G41610.1	2	17347157	17348239	+	AT2G41610	uncharacterized protein	422	86	339	187	294	173	243.16	0.421	-1.249	-7.622	2.49869e-14	1.10819e-11	0	0.0463	0.0145	0.0145	TRUE	0.0529	GO:0071669 [Name: plant-type cell wall organization or biogenesis]	GO:0016021 [Name: integral component of membrane]	GO:0003674 [Name: molecular_function]	-
AT2G43050.1	2	17902484	17904443	+	PME16	Plant invertase/pectin methylesterase inhibitor superfamily	677	194	505	241	514	410	440.42	0.42	-1.252	-3.941	8.11103e-05	0.00301674	0.1002	0.0294	0.0698	0.0698	TRUE	0.8712	GO:0042545 [Name: cell wall modification]; GO:0045490 [Name: pectin catabolic process]	GO:0005576 [Name: extracellular region]	GO:0004857 [Name: enzyme inhibitor activity]; GO:0045330 [Name: aspartyl esterase activity]; GO:0030599 [Name: pectinesterase activity]; GO:0046910 [Name: pectinesterase inhibitor activity]	-
AT5G15790.2	5	5148762	5151433	+	AT5G15790	RING/U-box superfamily protein	78	12	49	22	62	25	37.98	0.419	-1.255	-2.982	0.00286242	0.048267	0	0.2492	0.0964	0.0964	TRUE	0.4325	GO:0010468 [Name: regulation of gene expression]; GO:0036211 [Name: protein modification process]	GO:0005634 [Name: nucleus]	-	-
AT4G37450.1	4	17605758	17606755	-	AGP18	arabinogalactan protein 18	98	14	101	39	82	37	55.61	0.417	-1.263	-3.742	0.000182279	0.00567504	0	0.1729	0.0613	0.0613	TRUE	0.0957	GO:0009554 [Name: megasporogenesis]	GO:0005886 [Name: plasma membrane]; GO:0031225 [Name: anchored component of membrane]	-	-
AT1G51680.1	1	19158752	19161552	-	4CL1	4-coumarate	4335	670	2954	1579	2531	1676	2166.5	0.416	-1.264	-8.739	2.35783e-18	2.3093e-15	0.0152	0.0129	0.0145	0.0145	TRUE	0.1952	CoA ligase 1]	GO:0005737 [Name: cytoplasm]	GO:0016874 [Name: ligase activity]; GO:0016405 [Name: CoA-ligase activity]; GO:0005524 [Name: ATP binding]; GO:0016207 [Name: 4-coumarate-CoA ligase activity]	ath01100 [Pathway Title: Metabolic pathways]; ath00130 [Pathway Title: Ubiquinone and other terpenoid-quinone biosynthesis]; ath01110 [Pathway Title: Biosynthesis of secondary metabolites]; ath00360 [Pathway Title: Phenylalanine metabolism]; ath00940 [Pathway Title: Phenylpropanoid biosynthesis]
AT1G14350.1	1	4908255	4911168	+	FLP	Duplicated homeodomain-like superfamily protein	289	43	221	104	224	91	147.96	0.415	-1.27	-5.583	2.35896e-08	3.13379e-06	0.011	0.0704	0.0292	0.0292	TRUE	0.2661	GO:0009734 [Name: auxin-activated signaling pathway]; GO:0009553 [Name: embryo sac development]; GO:0010235 [Name: guard mother cell cytokinesis]; GO:0080022 [Name: primary root development]; GO:0009737 [Name: response to abscisic acid]; GO:0009554 [Name: megasporogenesis]; GO:0061087 [Name: positive regulation of histone H3-K27 methylation]; GO:1902806 [Name: regulation of cell cycle G1/S phase …	GO:0005634 [Name: nucleus]	GO:0000981 [Name: RNA polymerase II transcription factor activity sequence-specific DNA binding]; GO:0000976 [Name: transcription regulatory region sequence-specific DNA binding]; GO:0043565 [Name: sequence-specific DNA binding]; GO:0003700 [Name: transcription factor activity sequence-specific DNA binding]; GO:0000978 [Name: RNA polymerase II core promoter proximal region sequence-specific DNA b…	-
AT5G01360.1	5	147482	149367	-	TBL3	trichome birefringence-like protein (DUF828)	574	111	429	213	396	239	316.55	0.413	-1.275	-7.334	2.22701e-13	9.34788e-11	0.0086	0.0375	0.0179	0.0179	TRUE	0.1352	GO:0009827 [Name: plant-type cell wall modification]; GO:0030244 [Name: cellulose biosynthetic process]; GO:0045489 [Name: pectin biosynthetic process]; GO:0045492 [Name: xylan biosynthetic process]	GO:0005794 [Name: Golgi apparatus]; GO:0005886 [Name: plasma membrane]; GO:0000139 [Name: Golgi membrane]; GO:0016021 [Name: integral component of membrane]	GO:0016413 [Name: O-acetyltransferase activity]; GO:1990538 [Name: xylan O-acetyltransferase activity]	-
AT2G31110.2	2	13258329	13262099	-	TBL40	trichome birefringence-like protein (DUF828)	374	41	352	145	242	137	191.45	0.411	-1.281	-4.972	6.63249e-07	5.75289e-05	0.0318	0.0564	0.0415	0.0415	TRUE	0.5941	GO:0040007 [Name: growth]	GO:0016021 [Name: integral component of membrane]; GO:0005794 [Name: Golgi apparatus]	GO:0016413 [Name: O-acetyltransferase activity]	-
AT5G50560.1	5	20579121	20579588	+	AT5G50560	transmembrane protein putative (DUF 3339)	57	10	55	25	40	24	33.14	0.411	-1.282	-3.296	0.000979928	0.0215676	0	0.2843	0.0744	0.0744	TRUE	0.0849	[Gene Type: protein-coding]	GO:0016021 [Name: integral component of membrane]; GO:0031225 [Name: anchored component of membrane]	GO:0003674 [Name: molecular_function]	-
AT1G09750.1	1	3157501	3159148	+	AT1G09750	Eukaryotic aspartyl protease family protein	88	17	65	28	65	37	48.19	0.411	-1.283	-3.606	0.000310618	0.00880747	0	0.1982	0.0664	0.0664	TRUE	0.2725	GO:0043067 [Name: regulation of programmed cell death]; GO:0009627 [Name: systemic acquired resistance]	GO:0048046 [Name: apoplast]; GO:0099503 [Name: secretory vesicle]	GO:0004190 [Name: aspartic-type endopeptidase activity]; GO:0000166 [Name: nucleotide binding]	-
AT1G10060.2	1	3284239	3287107	+	BCAT1	branched-chain amino acid transaminase 1	175	35	106	70	103	66	91.83	0.409	-1.288	-4.37	1.24494e-05	0.000656134	0.0231	0.1081	0.0493	0.0493	TRUE	0.5386	GO:0006574 [Name: valine catabolic process]; GO:0006552 [Name: leucine catabolic process]; GO:0008652 [Name: cellular amino acid biosynthetic process]; GO:0009082 [Name: branched-chain amino acid biosynthetic process]	GO:0005739 [Name: mitochondrion]	GO:0052656 [Name: L-isoleucine transaminase activity]; GO:0052655 [Name: L-valine transaminase activity]; GO:0004084 [Name: branched-chain-amino-acid transaminase activity]; GO:0050048 [Name: L-leucine:2-oxoglutarate aminotransferase activity]; GO:0052654 [Name: L-leucine transaminase activity]	ath01100 [Pathway Title: Metabolic pathways]; ath01110 [Pathway Title: Biosynthesis of secondary metabolites]; ath01210 [Pathway Title: 2-Oxocarboxylic acid metabolism]; ath00966 [Pathway Title: Glucosinolate biosynthesis]; ath00770 [Pathway Title: Pantothenate and CoA biosynthesis]; ath00290 [Pathway Title: Valine leucine and isoleucine biosynthesis]; ath00280 [Pathway Title: Valine leucine and …
AT1G32170.1	1	11575320	11577927	+	XTH30	xyloglucan endotransglucosylase/hydrolase 30	657	98	635	259	387	305	364.82	0.409	-1.29	-5.827	5.63938e-09	8.44326e-07	0.031	0.0337	0.0319	0.0319	TRUE	0.3604	GO:0071555 [Name: cell wall organization]; GO:0010411 [Name: xyloglucan metabolic process]; GO:0042546 [Name: cell wall biogenesis]	GO:0048046 [Name: apoplast]	GO:0016762 [Name: xyloglucan:xyloglucosyl transferase activity]; GO:0004553 [Name: hydrolase activity hydrolyzing O-glycosyl compounds]	-
AT3G49260.1	3	18262430	18266021	+	iqd21	IQ-domain 21	270	67	185	84	177	150	159.85	0.409	-1.29	-3.662	0.000250655	0.00735836	0.091	0.0658	0.0813	0.0813	TRUE	0.3886	GO:0009738 [Name: abscisic acid-activated signaling pathway]; GO:0055074 [Name: calcium ion homeostasis]; GO:0090333 [Name: regulation of stomatal closure]; GO:0009737 [Name: response to abscisic acid]; GO:0042542 [Name: response to hydrogen peroxide]; GO:0019722 [Name: calcium-mediated signaling]; GO:0071244 [Name: cellular response to carbon dioxide]; GO:0009409 [Name: response to cold]	GO:0005856 [Name: cytoskeleton]; GO:0005634 [Name: nucleus]; GO:0005737 [Name: cytoplasm]; GO:0005886 [Name: plasma membrane]	GO:0005516 [Name: calmodulin binding]	-
AT1G78780.2	1	29621340	29622447	-	AT1G78780	pathogenesis-related family protein	120	23	127	47	93	58	74.02	0.407	-1.296	-4.406	1.05152e-05	0.000584325	0	0.1321	0.0463	0.0463	TRUE	0.165	GO:0008150 [Name: biological_process]	GO:0005737 [Name: cytoplasm]	GO:0003674 [Name: molecular_function]	-
AT2G17710.1	2	7693596	7694746	+	AT2G17710	Big1	1952	364	1598	877	1164	783	1088.54	0.407	-1.298	-9.764	1.60937e-22	2.90998e-19	0.0091	0.0171	0.0116	0.0116	TRUE	0.2225	GO:0009834 [Name: plant-type secondary cell wall biogenesis]; GO:0009737 [Name: response to abscisic acid]; GO:0044248 [Name: cellular catabolic process]; GO:0009059 [Name: macromolecule biosynthetic process]	GO:0005739 [Name: mitochondrion]	GO:0003674 [Name: molecular_function]	-
AT5G16340.1	5	5349094	5350907	-	AAE6	AMP-dependent synthetase and ligase family protein	75	20	83	30	72	38	52.37	0.406	-1.299	-3.605	0.000312036	0.00882636	0.0186	0.1831	0.0703	0.0703	TRUE	0.195	GO:0006631 [Name: fatty acid metabolic process]	GO:0009507 [Name: chloroplast]	GO:0016874 [Name: ligase activity]	-
AT2G21140.1	2	9060625	9062091	-	PRP2	proline-rich protein 2	869	161	597	278	640	324	457.73	0.405	-1.304	-6.82	9.12192e-12	3.02e-09	0.0209	0.0286	0.0236	0.0236	TRUE	0.3062	GO:0009664 [Name: plant-type cell wall organization]	GO:0005576 [Name: extracellular region]	-	-
AT3G52720.1	3	19538690	19541284	-	ACA1	alpha carbonic anhydrase 1	287	40	190	76	176	114	136.72	0.405	-1.304	-4.518	6.241e-06	0.000373285	0.038	0.0755	0.051	0.051	TRUE	0.5087	GO:0006730 [Name: one-carbon metabolic process]	GO:0009570 [Name: chloroplast stroma]; GO:0005783 [Name: endoplasmic reticulum]	GO:0008270 [Name: zinc ion binding]; GO:0016836 [Name: hydro-lyase activity]; GO:0004089 [Name: carbonate dehydratase activity]	ath00910 [Pathway Title: Nitrogen metabolism]
AT3G23730.1	3	8550110	8551335	+	XTH16	xyloglucan endotransglucosylase/hydrolase 16	114	18	112	44	82	48	64.6	0.403	-1.311	-4.392	1.1246e-05	0.000610825	0	0.1501	0.0462	0.0462	TRUE	0.0918	GO:0071555 [Name: cell wall organization]; GO:0010411 [Name: xyloglucan metabolic process]; GO:0042546 [Name: cell wall biogenesis]	GO:0048046 [Name: apoplast]	GO:0004553 [Name: hydrolase activity hydrolyzing O-glycosyl compounds]; GO:0016762 [Name: xyloglucan:xyloglucosyl transferase activity]	-
AT1G80760.1	1	30350539	30352208	-	NIP6-1	NOD26-like intrinsic protein 6;1	298	70	248	160	193	111	180.68	0.403	-1.312	-5.632	1.78381e-08	2.46649e-06	0.0187	0.0592	0.0322	0.0322	TRUE	0.3071	GO:0080029 [Name: cellular response to boron-containing substance levels]; GO:0046713 [Name: borate transport]	GO:0016021 [Name: integral component of membrane]; GO:0005886 [Name: plasma membrane]	GO:0015204 [Name: urea transmembrane transporter activity]; GO:0015267 [Name: channel activity]; GO:0046715 [Name: borate transmembrane transporter activity]; GO:0015168 [Name: glycerol transmembrane transporter activity]	-
AT3G26510.2	3	9711134	9712660	-	AT3G26510	Octicosapeptide/Phox/Bem1p family protein	101	26	113	44	70	62	69.94	0.402	-1.313	-3.686	0.000227863	0.0068493	0.0418	0.1393	0.0738	0.0738	TRUE	0.7273	GO:0055062 [Name: phosphate ion homeostasis]; GO:0009611 [Name: response to wounding]; GO:0019538 [Name: protein metabolic process]; GO:0019684 [Name: photosynthesis light reaction]; GO:0043170 [Name: macromolecule metabolic process]; GO:0009891 [Name: positive regulation of biosynthetic process]; GO:0031326 [Name: regulation of cellular biosynthetic process]; GO:0033993 [Name: response to lipid]…	GO:0005634 [Name: nucleus]	GO:0005515 [Name: protein binding]	-
AT4G30270.1	4	14819192	14820592	-	XTH24	xyloglucan endotransglucosylase/hydrolase 24	4929	700	3855	1908	2694	1824	2482.46	0.402	-1.313	-9.045	1.4927e-19	1.67083e-16	0.0155	0.0124	0.0147	0.0147	TRUE	0.1538	GO:0009828 [Name: plant-type cell wall loosening]; GO:0042546 [Name: cell wall biogenesis]; GO:0010411 [Name: xyloglucan metabolic process]; GO:0071669 [Name: plant-type cell wall organization or biogenesis]; GO:0071555 [Name: cell wall organization]	GO:0009505 [Name: plant-type cell wall]; GO:0048046 [Name: apoplast]; GO:0099503 [Name: secretory vesicle]; GO:0005794 [Name: Golgi apparatus]; GO:0005737 [Name: cytoplasm]; GO:0005886 [Name: plasma membrane]	GO:0004553 [Name: hydrolase activity hydrolyzing O-glycosyl compounds]; GO:0016762 [Name: xyloglucan:xyloglucosyl transferase activity]	-
AT1G68600.1	1	25759842	25762934	+	ALMT5	aluminum activated malate transporter family protein	978	163	803	332	673	397	525.94	0.402	-1.314	-8.384	5.10346e-17	3.99873e-14	0.01	0.0261	0.0153	0.0153	TRUE	0.216	GO:0015743 [Name: malate transport]	GO:0016021 [Name: integral component of membrane]; GO:0009705 [Name: plant-type vacuole membrane]; GO:0005789 [Name: endoplasmic reticulum membrane]	-	-
AT5G11950.2	5	3854916	3856983	+	LOG8	Putative lysine decarboxylase family protein	400	58	336	185	237	129	208.37	0.402	-1.314	-6.275	3.50752e-10	7.29626e-08	0.0123	0.0525	0.0258	0.0258	TRUE	0.2461	GO:0009691 [Name: cytokinin biosynthetic process]	GO:0005829 [Name: cytosol]; GO:0005634 [Name: nucleus]; GO:0005886 [Name: plasma membrane]	GO:0042803 [Name: protein homodimerization activity]; GO:0016799 [Name: hydrolase activity hydrolyzing N-glycosyl compounds]	-
AT4G14130.1	4	8137051	8138281	-	XTH15	xyloglucan endotransglucosylase/hydrolase 15	83	13	61	36	40	32	42.34	0.401	-1.318	-3.427	0.000609391	0.015015	0	0.2244	0.0786	0.0786	TRUE	0.4692	GO:0042546 [Name: cell wall biogenesis]; GO:0071555 [Name: cell wall organization]; GO:0010411 [Name: xyloglucan metabolic process]; GO:0010218 [Name: response to far red light]	GO:0048046 [Name: apoplast]	GO:0016762 [Name: xyloglucan:xyloglucosyl transferase activity]; GO:0004553 [Name: hydrolase activity hydrolyzing O-glycosyl compounds]; GO:0033946 [Name: xyloglucan-specific endo-beta-14-glucanase activity]	-
AT1G32070.2	1	11534684	11536338	-	NSI	nuclear shuttle interacting	101	13	78	38	82	21	49.26	0.4	-1.32	-3.18	0.00147491	0.0294305	0.0507	0.1941	0.0999	0.0999	TRUE	0.7297	GO:0030187 [Name: melatonin biosynthetic process]	GO:0009507 [Name: chloroplast]; GO:0005634 [Name: nucleus]; GO:0005737 [Name: cytoplasm]	GO:0004059 [Name: aralkylamine N-acetyltransferase activity]; GO:0004468 [Name: lysine N-acetyltransferase activity acting on acetyl phosphate as donor]; GO:0008080 [Name: N-acetyltransferase activity]	-
AT5G20250.2	5	6833659	6836782	+	RFS6	Raffinose synthase family protein	627	157	373	221	430	281	358.75	0.401	-1.32	-4.591	4.41588e-06	0.00028595	0.0699	0.0342	0.0559	0.0559	TRUE	0.1057	GO:0005975 [Name: carbohydrate metabolic process]	GO:0009507 [Name: chloroplast]; GO:0009506 [Name: plasmodesma]; GO:0005829 [Name: cytosol]; GO:0005737 [Name: cytoplasm]	GO:0047274 [Name: galactinol-sucrose galactosyltransferase activity]	ath00052 [Pathway Title: Galactose metabolism]
AT5G46240.1	5	18743566	18746730	-	KAT1		123	16	101	48	60	50	61.79	0.395	-1.339	-3.878	0.000105406	0.00375974	0.0233	0.1565	0.0666	0.0666	TRUE	0.4403	GO:0034765 [Name: regulation of ion transmembrane transport]	GO:0016021 [Name: integral component of membrane]; GO:0005886 [Name: plasma membrane]	GO:0005249 [Name: voltage-gated potassium channel activity]; GO:0042802 [Name: identical protein binding]; GO:0005242 [Name: inward rectifier potassium channel activity]	-
AT2G27360.1	2	11706198	11708065	+	AT2G27360	GDSL-like Lipase/Acylhydrolase superfamily protein	89	17	81	36	57	39	51.49	0.394	-1.345	-4.155	3.25465e-05	0.00143804	0	0.186	0.0525	0.0525	TRUE	0.1356	GO:0016042 [Name: lipid catabolic process]	GO:0005576 [Name: extracellular region]	GO:0016788 [Name: hydrolase activity acting on ester bonds]	-
AT3G05690.1	3	1676546	1678932	-	NFYA2	nuclear factor Y subunit A2	134	20	140	55	108	44	75.89	0.392	-1.352	-4.5	6.78043e-06	0.000401463	0.0126	0.129	0.0494	0.0494	TRUE	0.0998	GO:0009567 [Name: double fertilization forming a zygote and endosperm]; GO:0006357 [Name: regulation of transcription from RNA polymerase II promoter]; GO:0006355 [Name: regulation of transcription DNA-templated]	GO:0016602 [Name: CCAAT-binding factor complex]; GO:0005634 [Name: nucleus]	GO:0000978 [Name: RNA polymerase II core promoter proximal region sequence-specific DNA binding]; GO:0000981 [Name: RNA polymerase II transcription factor activity sequence-specific DNA binding]; GO:0003700 [Name: transcription factor activity sequence-specific DNA binding]; GO:0003677 [Name: DNA binding]	-
AT3G21240.1	3	7454269	7457379	-	4CL2	4-coumarate	269	57	160	105	155	98	142.01	0.391	-1.354	-4.929	8.27334e-07	6.82362e-05	0.0319	0.073	0.0455	0.0455	TRUE	0.26	CoA ligase 2]	-	GO:0016207 [Name: 4-coumarate-CoA ligase activity]; GO:0005524 [Name: ATP binding]; GO:0016405 [Name: CoA-ligase activity]	ath01100 [Pathway Title: Metabolic pathways]; ath00940 [Pathway Title: Phenylpropanoid biosynthesis]; ath00130 [Pathway Title: Ubiquinone and other terpenoid-quinone biosynthesis]; ath01110 [Pathway Title: Biosynthesis of secondary metabolites]; ath00360 [Pathway Title: Phenylalanine metabolism]
AT5G22490.1	5	7458943	7461049	-	AT5G22490	O-acyltransferase (WSD1-like) family protein	248	31	147	53	171	74	109.19	0.386	-1.373	-3.916	9.01527e-05	0.00329057	0.0688	0.0923	0.0771	0.0771	TRUE	0.7945	GO:0019432 [Name: triglyceride biosynthetic process]	GO:0016021 [Name: integral component of membrane]; GO:0005789 [Name: endoplasmic reticulum membrane]; GO:0005886 [Name: plasma membrane]	GO:0047196 [Name: long-chain-alcohol O-fatty-acyltransferase activity]; GO:0004144 [Name: diacylglycerol O-acyltransferase activity]	-
AT5G43780.1	5	17589394	17591535	-	APS4	Pseudouridine synthase/archaeosine transglycosylase-like family protein	3810	746	3075	1578	2143	1550	2122.21	0.385	-1.377	-9.571	1.06075e-21	1.5848e-18	0.0142	0.013	0.0143	0.0143	TRUE	0.2744	GO:0070814 [Name: hydrogen sulfide biosynthetic process]; GO:0000103 [Name: sulfate assimilation]	GO:0009536 [Name: plastid]; GO:0009507 [Name: chloroplast]; GO:0005739 [Name: mitochondrion]; GO:0009570 [Name: chloroplast stroma]	GO:0004020 [Name: adenylylsulfate kinase activity]; GO:0005524 [Name: ATP binding]; GO:0004781 [Name: sulfate adenylyltransferase (ATP) activity]	ath00450 [Pathway Title: Selenocompound metabolism]; ath01130 [Pathway Title: Biosynthesis of antibiotics]; ath00230 [Pathway Title: Purine metabolism]; ath01100 [Pathway Title: Metabolic pathways]; ath00261 [Pathway Title: Monobactam biosynthesis]; ath00920 [Pathway Title: Sulfur metabolism]
AT5G45380.1	5	18391124	18395894	+	DUR3	urea-proton symporter DEGRADATION OF UREA 3 (DUR3)	89	20	92	45	67	32	56.31	0.385	-1.377	-4.375	1.21367e-05	0.000646524	0	0.1709	0.0501	0.0501	TRUE	0.1315	GO:0071918 [Name: urea transmembrane transport]; GO:0006995 [Name: cellular response to nitrogen starvation]	GO:0016021 [Name: integral component of membrane]; GO:0005886 [Name: plasma membrane]	GO:0015204 [Name: urea transmembrane transporter activity]; GO:0015293 [Name: symporter activity]	-
AT2G35210.1	2	14836062	14838149	+	AGD10	root and pollen arfgap	110	19	81	42	53	45	57.11	0.383	-1.385	-4.011	6.0551e-05	0.00238012	0	0.1686	0.0646	0.0646	TRUE	0.4409	GO:0009555 [Name: pollen development]; GO:0048205 [Name: COPI coating of Golgi vesicle]; GO:0009793 [Name: embryo development ending in seed dormancy]	GO:0000139 [Name: Golgi membrane]	GO:0046872 [Name: metal ion binding]; GO:0005096 [Name: GTPase activator activity]	ath04144 [Pathway Title: Endocytosis]
AT5G42100.1	5	16829151	16831219	-	ATBG_PPAP	beta-13-glucanase	211	38	177	63	161	79	115.25	0.382	-1.387	-5.331	9.77862e-08	1.09455e-05	0.0127	0.0879	0.0381	0.0381	TRUE	0.4075	GO:0005975 [Name: carbohydrate metabolic process]; GO:0007154 [Name: cell communication]; GO:0071555 [Name: cell wall organization]; GO:0006952 [Name: defense response]	GO:0046658 [Name: anchored component of plasma membrane]; GO:0009505 [Name: plant-type cell wall]; GO:0005783 [Name: endoplasmic reticulum]; GO:0009506 [Name: plasmodesma]; GO:0031225 [Name: anchored component of membrane]	GO:0042973 [Name: glucan endo-13-beta-D-glucosidase activity]	-
AT3G61880.1	3	22905868	22907958	-	CYP78A9	cytochrome p450 78a9	159	26	113	47	84	67	79.96	0.379	-1.4	-4.381	1.17952e-05	0.000631568	0.0257	0.1229	0.0581	0.0581	TRUE	0.6135	GO:0040008 [Name: regulation of growth]; GO:0048316 [Name: seed development]; GO:0010154 [Name: fruit development]	GO:0016021 [Name: integral component of membrane]	GO:0005506 [Name: iron ion binding]; GO:0004497 [Name: monooxygenase activity]; GO:0020037 [Name: heme binding]; GO:0016705 [Name: oxidoreductase activity acting on paired donors with incorporation or reduction of molecular oxygen]	-
AT3G07010.1	3	2212728	2216483	-	AT3G07010	Pectin lyase-like superfamily protein	442	98	462	140	378	203	278.58	0.378	-1.403	-5.698	1.21504e-08	1.78505e-06	0.0376	0.0415	0.0391	0.0391	TRUE	0.7152	GO:0045490 [Name: pectin catabolic process]	GO:0005576 [Name: extracellular region]	GO:0046872 [Name: metal ion binding]; GO:0030570 [Name: pectate lyase activity]	ath00040 [Pathway Title: Pentose and glucuronate interconversions]
AT3G55240.1	3	20473541	20474763	-	AT3G55240	Plant protein 1589 of unknown function	70	17	70	26	56	30	44.49	0.377	-1.407	-3.934	8.35877e-05	0.00308933	0	0.214	0.0649	0.0649	TRUE	0.1371	GO:0032502 [Name: developmental process]	GO:0009507 [Name: chloroplast]	GO:0003674 [Name: molecular_function]	-
AT2G04795.1	2	1682953	1683475	+	AT2G04795	uncharacterized protein	70	41	83	47	84	41	69.9	0.376	-1.409	-2.968	0.00299269	0.0498202	0.1464	0.1393	0.1436	0.1436	TRUE	0.7252	GO:0006979 [Name: response to oxidative stress]	-	GO:0003674 [Name: molecular_function]	-
AT4G04955.1	4	2522034	2525280	-	ALN	allantoinase	190	38	175	69	150	66	110.17	0.376	-1.411	-5.939	2.86973e-09	4.7841e-07	0	0.0916	0.0297	0.0297	TRUE	0.1895	GO:0006995 [Name: cellular response to nitrogen starvation]; GO:0010136 [Name: ureide catabolic process]; GO:0006145 [Name: purine nucleobase catabolic process]; GO:0000256 [Name: allantoin catabolic process]	GO:0005783 [Name: endoplasmic reticulum]; GO:0005737 [Name: cytoplasm]	GO:0008270 [Name: zinc ion binding]; GO:0004038 [Name: allantoinase activity]; GO:0050897 [Name: cobalt ion binding]	ath01100 [Pathway Title: Metabolic pathways]; ath00230 [Pathway Title: Purine metabolism]
AT2G28780.1	2	12340034	12343421	-	AT2G28780	P-hydroxybenzoic acid efflux pump subunit	96	17	55	33	57	27	46.32	0.375	-1.417	-3.828	0.00012945	0.0043845	0	0.2059	0.0723	0.0723	TRUE	0.5089	GO:0055085 [Name: transmembrane transport]	GO:0016021 [Name: integral component of membrane]; GO:0005886 [Name: plasma membrane]	GO:0022857 [Name: transmembrane transporter activity]	-
AT3G58850.1	3	21759352	21759942	-	PAR2	phy rapidly regulated 2	69	34	97	36	80	44	65.82	0.367	-1.444	-3.291	0.000998761	0.0218433	0.1038	0.1474	0.119	0.119	TRUE	0.13	GO:0006355 [Name: regulation of transcription DNA-templated]; GO:0032502 [Name: developmental process]; GO:0009641 [Name: shade avoidance]; GO:0009742 [Name: brassinosteroid mediated signaling pathway]; GO:0040008 [Name: regulation of growth]; GO:0007623 [Name: circadian rhythm]	GO:0005634 [Name: nucleus]	-	-
AT1G01180.1	1	75583	76758	+	AT1G01180	S-adenosyl-L-methionine-dependent methyltransferases superfamily protein	76	21	72	27	52	39	49.72	0.367	-1.447	-3.761	0.000169516	0.00537738	0.0256	0.1924	0.0813	0.0813	TRUE	0.4259	GO:0032259 [Name: methylation]	GO:0016021 [Name: integral component of membrane]	GO:0008168 [Name: methyltransferase activity]	-
AT2G43150.1	2	17945893	17947022	+	AT2G43150	Proline-rich extensin-like family protein	48	8	39	20	30	13	25.04	0.366	-1.449	-3.211	0.00132362	0.0270116	0	0.3735	0.0993	0.0993	TRUE	0.0801	GO:0009664 [Name: plant-type cell wall organization]	-	GO:0005199 [Name: structural constituent of cell wall]	-
AT1G60960.1	1	22445310	22447214	-	IRT3	iron regulated transporter 3	104	15	93	40	62	34	54.07	0.365	-1.452	-4.601	4.19863e-06	0.000274147	0	0.1776	0.0499	0.0499	TRUE	0.0674	GO:0055072 [Name: iron ion homeostasis]; GO:0009624 [Name: response to nematode]; GO:0006826 [Name: iron ion transport]; GO:0071577 [Name: zinc II ion transmembrane transport]; GO:0006829 [Name: zinc II ion transport]	GO:0016021 [Name: integral component of membrane]; GO:0016020 [Name: membrane]; GO:0009535 [Name: chloroplast thylakoid membrane]; GO:0000325 [Name: plant-type vacuole]; GO:0005886 [Name: plasma membrane]	GO:0005385 [Name: zinc ion transmembrane transporter activity]; GO:0005381 [Name: iron ion transmembrane transporter activity]	-
AT3G59370.1	3	21941865	21942571	-	AT3G59370	Vacuolar calcium-binding protein-like protein	82	23	98	32	57	48	58.14	0.365	-1.452	-3.796	0.000147167	0.00481127	0.044	0.1658	0.0838	0.0838	TRUE	0.6318	GO:0008150 [Name: biological_process]	GO:0005575 [Name: cellular_component]	GO:0003674 [Name: molecular_function]	-
AT1G16490.1	1	5629655	5630995	-	ATMYB58	myb domain protein 58	145	47	102	56	118	56	93.76	0.365	-1.455	-3.98	6.89422e-05	0.00262651	0.0691	0.1061	0.0823	0.0823	TRUE	0.592	GO:0009809 [Name: lignin biosynthetic process]; GO:0045893 [Name: positive regulation of transcription DNA-templated]; GO:2000652 [Name: regulation of secondary cell wall biogenesis]; GO:0009416 [Name: response to light stimulus]	GO:0005634 [Name: nucleus]	GO:0003700 [Name: transcription factor activity sequence-specific DNA binding]; GO:0000976 [Name: transcription regulatory region sequence-specific DNA binding]	-
AT3G59010.1	3	21802805	21805214	-	PME35	pectin methylesterase 61	3075	551	2747	1025	1777	1285	1693.39	0.364	-1.457	-9.174	4.54175e-20	5.61886e-17	0.0204	0.0141	0.0174	0.0174	TRUE	0.5105	GO:0042545 [Name: cell wall modification]; GO:0045490 [Name: pectin catabolic process]	GO:0005576 [Name: extracellular region]	GO:0030599 [Name: pectinesterase activity]; GO:0045330 [Name: aspartyl esterase activity]; GO:0004857 [Name: enzyme inhibitor activity]; GO:0046910 [Name: pectinesterase inhibitor activity]	-
AT1G11700.1	1	3945737	3946613	+	AT1G11700	senescence regulator (Protein of unknown function DUF584)	209	61	193	87	176	78	138.07	0.364	-1.458	-5.486	4.11719e-08	5.06694e-06	0.0248	0.0748	0.0416	0.0416	TRUE	0.4487	GO:0009751 [Name: response to salicylic acid]; GO:0009646 [Name: response to absence of light]; GO:0009737 [Name: response to abscisic acid]; GO:0010150 [Name: leaf senescence]	GO:0005737 [Name: cytoplasm]	GO:0003674 [Name: molecular_function]	-
AT5G07580.1	5	2399504	2400601	+	ERF106	ethylene-responsive transcription factor	276	69	222	84	202	118	164.9	0.363	-1.462	-5.315	1.06408e-07	1.1688e-05	0.036	0.0641	0.0466	0.0466	TRUE	0.4837	GO:0009873 [Name: ethylene-activated signaling pathway]	GO:0005634 [Name: nucleus]	GO:0003700 [Name: transcription factor activity sequence-specific DNA binding]; GO:0003677 [Name: DNA binding]	-
AT1G52750.1	1	19646465	19649261	-	AT1G52750	alpha/beta-Hydrolases superfamily protein	236	40	281	86	172	99	142.84	0.363	-1.463	-5.629	1.81254e-08	2.49155e-06	0.0241	0.0726	0.04	0.04	TRUE	0.5324	GO:0071554 [Name: cell wall organization or biogenesis]; GO:0033993 [Name: response to lipid]; GO:0010073 [Name: meristem maintenance]; GO:0014070 [Name: response to organic cyclic compound]; GO:0048589 [Name: developmental growth]; GO:0030154 [Name: cell differentiation]	GO:0016021 [Name: integral component of membrane]	GO:0016787 [Name: hydrolase activity]; GO:0003824 [Name: catalytic activity]	-
AT1G72430.1	1	27264911	27265630	-	AT1G72430	SAUR-like auxin-responsive protein family	233	43	217	115	121	75	130.9	0.36	-1.472	-5.583	2.35974e-08	3.13379e-06	0.0219	0.0785	0.0405	0.0405	TRUE	0.5373	GO:0009733 [Name: response to auxin]; GO:0071456 [Name: cellular response to hypoxia]; GO:0009873 [Name: ethylene-activated signaling pathway]; GO:0030307 [Name: positive regulation of cell growth]	GO:0005634 [Name: nucleus]; GO:0005737 [Name: cytoplasm]; GO:0019897 [Name: extrinsic component of plasma membrane]	-	-
AT4G15530.1	4	8864828	8870967	-	PPDK	pyruvate orthophosphate dikinase	448	61	254	145	225	113	196.13	0.359	-1.48	-6.196	5.7772e-10	1.13166e-07	0.0253	0.0553	0.0346	0.0346	TRUE	0.4453	GO:0006090 [Name: pyruvate metabolic process]; GO:0015979 [Name: photosynthesis]	GO:0009507 [Name: chloroplast]; GO:0005829 [Name: cytosol]; GO:0009570 [Name: chloroplast stroma]; GO:0043231 [Name: intracellular membrane-bounded organelle]	GO:0016301 [Name: kinase activity]; GO:0046872 [Name: metal ion binding]; GO:0005524 [Name: ATP binding]; GO:0050242 [Name: pyruvate phosphate dikinase activity]	ath01100 [Pathway Title: Metabolic pathways]; ath00710 [Pathway Title: Carbon fixation in photosynthetic organisms]; ath00620 [Pathway Title: Pyruvate metabolism]; ath01200 [Pathway Title: Carbon metabolism]
AT2G40610.1	2	16948863	16950557	-	EXPA8	expansin A8	287	66	215	69	149	155	162.52	0.358	-1.483	-3.817	0.000135068	0.0045291	0.1242	0.0649	0.1006	0.1006	TRUE	1.6461	GO:0009664 [Name: plant-type cell wall organization]; GO:0009635 [Name: response to herbicide]; GO:0006949 [Name: syncytium formation]	GO:0016020 [Name: membrane]; GO:0005576 [Name: extracellular region]	-	-
AT2G14560.2	2	6213972	6214792	+	LURP1	LURP-one-like protein (DUF567)	122	27	99	31	122	31	69.03	0.357	-1.488	-3.442	0.000577721	0.0143855	0.1032	0.141	0.116	0.116	TRUE	2.3902	GO:0050832 [Name: defense response to fungus]; GO:0009751 [Name: response to salicylic acid]	GO:0005739 [Name: mitochondrion]	GO:0003674 [Name: molecular_function]	-
AT1G13448.1	1	4612243	4612929	+	AT1G13448		45	10	37	18	23	18	25.64	0.355	-1.492	-3.235	0.00121533	0.0253934	0	0.3648	0.1053	0.1053	TRUE	0.2455	-	-	-	-
AT2G30930.1	2	13162369	13163398	+	AT2G30930	uncharacterized protein	298	68	349	130	198	130	194.05	0.353	-1.501	-6.835	8.21197e-12	2.75758e-09	0.0164	0.0558	0.0282	0.0282	TRUE	0.2331	GO:0010015 [Name: root morphogenesis]; GO:0033993 [Name: response to lipid]; GO:0014070 [Name: response to organic cyclic compound]; GO:0030154 [Name: cell differentiation]; GO:0042742 [Name: defense response to bacterium]; GO:0090558 [Name: plant epidermis development]; GO:0048589 [Name: developmental growth]	GO:0009507 [Name: chloroplast]; GO:0005777 [Name: peroxisome]; GO:0005886 [Name: plasma membrane]	GO:0003674 [Name: molecular_function]	-
ATCG01240.1	Pt	140704	141171	+	RPS7-A	ribosomal protein S7	2920	1054	4445	1543	3175	1399	2480.76	0.353	-1.501	-6.272	3.56354e-10	7.34777e-08	0.0637	0.0124	0.0407	0.0407	TRUE	1.2244	[Gene Type: protein-coding]	GO:0009536 [Name: plastid]; GO:0009507 [Name: chloroplast]; GO:0009579 [Name: thylakoid]; GO:0005840 [Name: ribosome]; GO:0015935 [Name: small ribosomal subunit]	GO:0003735 [Name: structural constituent of ribosome]; GO:0003729 [Name: mRNA binding]; GO:0019843 [Name: rRNA binding]	ath03010 [Pathway Title: Ribosome]
AT5G65210.1	5	26057623	26061052	+	TGA1	bZIP transcription factor family protein	40	11	54	27	32	11	29.25	0.35	-1.514	-2.977	0.00291378	0.0488178	0.0565	0.3209	0.1432	0.1432	TRUE	0.5586	GO:0006351 [Name: transcription DNA-templated]; GO:0042742 [Name: defense response to bacterium]	GO:0005634 [Name: nucleus]	GO:0003700 [Name: transcription factor activity sequence-specific DNA binding]; GO:0000976 [Name: transcription regulatory region sequence-specific DNA binding]; GO:0043565 [Name: sequence-specific DNA binding]	ath04075 [Pathway Title: Plant hormone signal transduction]
AT1G19960.1	1	6928039	6928463	+	AT1G19960	transcription factor	116	20	97	34	82	34	60.54	0.349	-1.518	-4.75	2.03287e-06	0.000147483	0	0.1595	0.0535	0.0535	TRUE	0.3507	GO:0033993 [Name: response to lipid]; GO:0006355 [Name: regulation of transcription DNA-templated]	GO:0005575 [Name: cellular_component]	GO:0003674 [Name: molecular_function]	-
AT4G35060.1	4	16685720	16686703	-	HIPP25	Heavy metal transport/detoxification superfamily protein	516	134	461	193	308	232	319.76	0.348	-1.523	-6.686	2.29432e-11	6.65806e-09	0.0309	0.0373	0.0332	0.0332	TRUE	0.4385	GO:0009753 [Name: response to jasmonic acid]; GO:0098542 [Name: defense response to other organism]; GO:0006970 [Name: response to osmotic stress]; GO:0009314 [Name: response to radiation]; GO:0032787 [Name: monocarboxylic acid metabolic process]; GO:0046394 [Name: carboxylic acid biosynthetic process]; GO:0009414 [Name: response to water deprivation]; GO:0009611 [Name: response to wounding]; GO:…	GO:0016020 [Name: membrane]; GO:0009506 [Name: plasmodesma]	GO:0046872 [Name: metal ion binding]	-
AT2G15020.1	2	6491434	6493352	-	AT2G15020	uncharacterized protein	172	53	189	73	113	89	121.97	0.345	-1.535	-4.944	7.6618e-07	6.45513e-05	0.0454	0.0836	0.0587	0.0587	TRUE	0.1259	GO:0009737 [Name: response to abscisic acid]; GO:0044281 [Name: small molecule metabolic process]; GO:0050793 [Name: regulation of developmental process]	GO:0005575 [Name: cellular_component]	GO:0003674 [Name: molecular_function]	-
AT4G08300.1	4	5244891	5248342	+	AT4G08300	nodulin MtN21 /EamA-like transporter family protein	406	62	208	133	171	107	177.47	0.345	-1.536	-5.547	2.91147e-08	3.76027e-06	0.0419	0.0602	0.0479	0.0479	TRUE	0.1596	GO:0015698 [Name: inorganic anion transport]; GO:0031668 [Name: cellular response to extracellular stimulus]; GO:0009416 [Name: response to light stimulus]; GO:0030003 [Name: cellular cation homeostasis]	GO:0016021 [Name: integral component of membrane]; GO:0005886 [Name: plasma membrane]	GO:0022857 [Name: transmembrane transporter activity]	-
AT1G70260.1	1	26456844	26459450	-	AT1G70260	nodulin MtN21 /EamA-like transporter family protein	79	15	78	41	47	18	45.06	0.34	-1.558	-3.848	0.000118891	0.0041098	0.0214	0.2114	0.0901	0.0901	TRUE	0.6719	GO:1902289 [Name: negative regulation of defense response to oomycetes]; GO:1900150 [Name: regulation of defense response to fungus]; GO:1900425 [Name: negative regulation of defense response to bacterium]	GO:0016021 [Name: integral component of membrane]; GO:0005783 [Name: endoplasmic reticulum]; GO:0005886 [Name: plasma membrane]	GO:0022857 [Name: transmembrane transporter activity]	-
AT2G20100.2	2	8678050	8682112	+	BHLH133	basic helix-loop-helix (bHLH) DNA-binding superfamily protein	69	10	32	15	31	21	28.86	0.339	-1.561	-3.115	0.001839	0.0348628	0.0573	0.3252	0.1372	0.1372	TRUE	0.1493	GO:0006357 [Name: regulation of transcription from RNA polymerase II promoter]	GO:0005634 [Name: nucleus]	GO:0000981 [Name: RNA polymerase II transcription factor activity sequence-specific DNA binding]; GO:0046983 [Name: protein dimerization activity]; GO:0000978 [Name: RNA polymerase II core promoter proximal region sequence-specific DNA binding]	-
AT3G13437.1	3	4376361	4376959	+	AT3G13437	uncharacterized protein	42	12	38	17	22	19	26.72	0.339	-1.562	-3.25	0.00115567	0.0244671	0	0.3504	0.1186	0.1186	TRUE	0.3055	GO:0009414 [Name: response to water deprivation]; GO:0050832 [Name: defense response to fungus]	GO:0016021 [Name: integral component of membrane]	GO:0003674 [Name: molecular_function]	-
AT5G44020.1	5	17712409	17714336	+	AT5G44020	HAD superfamily subfamily IIIB acid phosphatase	74	9	90	24	47	28	41.15	0.338	-1.565	-3.634	0.000278845	0.00802268	0.0403	0.2306	0.1037	0.1037	TRUE	0.1007	GO:0030154 [Name: cell differentiation]; GO:0032787 [Name: monocarboxylic acid metabolic process]; GO:0044255 [Name: cellular lipid metabolic process]; GO:0048589 [Name: developmental growth]; GO:0090558 [Name: plant epidermis development]; GO:0009416 [Name: response to light stimulus]; GO:0010015 [Name: root morphogenesis]; GO:0048767 [Name: root hair elongation]	GO:0009506 [Name: plasmodesma]; GO:0000325 [Name: plant-type vacuole]; GO:0009536 [Name: plastid]	GO:0003993 [Name: acid phosphatase activity]; GO:0045735 [Name: nutrient reservoir activity]	-
AT1G51680.3	1	19158752	19161552	-	4CL1	4-coumarate	201	85	115	107	114	89	142.32	0.337	-1.57	-3.27	0.00107594	0.0231604	0.2154	0.0729	0.1565	0.1565	TRUE	0.6443	CoA ligase 1]	GO:0005737 [Name: cytoplasm]; GO:0009507 [Name: chloroplast]	GO:0016874 [Name: ligase activity]	ath00360 [Pathway Title: Phenylalanine metabolism]; ath00130 [Pathway Title: Ubiquinone and other terpenoid-quinone biosynthesis]; ath01100 [Pathway Title: Metabolic pathways]; ath01110 [Pathway Title: Biosynthesis of secondary metabolites]; ath00940 [Pathway Title: Phenylpropanoid biosynthesis]
AT2G37130.1	2	15597921	15600077	-	PER21	Peroxidase superfamily protein	251	81	234	95	123	145	171.58	0.333	-1.585	-4.119	3.79905e-05	0.00163255	0.1232	0.0619	0.0988	0.0988	TRUE	1.7403	GO:0048511 [Name: rhythmic process]; GO:0042744 [Name: hydrogen peroxide catabolic process]; GO:0006979 [Name: response to oxidative stress]; GO:0050832 [Name: defense response to fungus]	GO:0009505 [Name: plant-type cell wall]; GO:0005576 [Name: extracellular region]	GO:0020037 [Name: heme binding]; GO:0046872 [Name: metal ion binding]; GO:0004601 [Name: peroxidase activity]	ath01100 [Pathway Title: Metabolic pathways]; ath00940 [Pathway Title: Phenylpropanoid biosynthesis]; ath01110 [Pathway Title: Biosynthesis of secondary metabolites]
AT1G73220.1	1	27538276	27540235	+	OCT1	organic cation/carnitine transporter1	82	10	36	26	35	14	31.9	0.333	-1.588	-3.178	0.00148509	0.0295584	0.073	0.295	0.1402	0.1402	TRUE	0.3059	GO:0015839 [Name: cadaverine transport]; GO:0010150 [Name: leaf senescence]	GO:0016021 [Name: integral component of membrane]; GO:0005886 [Name: plasma membrane]	GO:0022857 [Name: transmembrane transporter activity]; GO:0005524 [Name: ATP binding]; GO:0015226 [Name: carnitine transmembrane transporter activity]	-
AT5G06570.1	5	2007990	2011041	-	CXE15	alpha/beta-Hydrolases superfamily protein	123	22	128	48	73	41	70.01	0.332	-1.589	-5.571	2.53236e-08	3.34413e-06	0	0.1391	0.041	0.041	TRUE	0.1591	GO:0009642 [Name: response to light intensity]; GO:0071669 [Name: plant-type cell wall organization or biogenesis]; GO:0009611 [Name: response to wounding]; GO:0015698 [Name: inorganic anion transport]; GO:0030154 [Name: cell differentiation]; GO:0033993 [Name: response to lipid]; GO:0048364 [Name: root development]; GO:0090558 [Name: plant epidermis development]; GO:0010015 [Name: root morphogen…	-	GO:0016787 [Name: hydrolase activity]; GO:0080030 [Name: methyl indole-3-acetate esterase activity]	-
AT5G61340.1	5	24662004	24663117	-	AT5G61340	uncharacterized protein	248	64	158	63	150	99	138.17	0.331	-1.594	-4.613	3.96776e-06	0.00026125	0.0753	0.0748	0.0763	0.0763	TRUE	0.1285	GO:0071554 [Name: cell wall organization or biogenesis]; GO:0010015 [Name: root morphogenesis]; GO:0044550 [Name: secondary metabolite biosynthetic process]; GO:0019438 [Name: aromatic compound biosynthetic process]; GO:0008610 [Name: lipid biosynthetic process]; GO:0030154 [Name: cell differentiation]; GO:0090558 [Name: plant epidermis development]; GO:0048589 [Name: developmental growth]; GO:19…	GO:0016021 [Name: integral component of membrane]	GO:0003674 [Name: molecular_function]	-
AT4G14400.1	4	8294446	8298602	+	ACD6	ankyrin repeat family protein	138	22	265	85	102	46	100.86	0.329	-1.604	-3.601	0.000317341	0.00890145	0.1488	0.0992	0.13	0.13	TRUE	3.1906	GO:0050826 [Name: response to freezing]; GO:0009416 [Name: response to light stimulus]; GO:0009751 [Name: response to salicylic acid]; GO:0008219 [Name: cell death]; GO:1900426 [Name: positive regulation of defense response to bacterium]; GO:0009615 [Name: response to virus]; GO:0071446 [Name: cellular response to salicylic acid stimulus]; GO:0016567 [Name: protein ubiquitination]; GO:1900150 [Na…	GO:0005887 [Name: integral component of plasma membrane]; GO:0030176 [Name: integral component of endoplasmic reticulum membrane]; GO:0016020 [Name: membrane]	-	-
AT1G78260.1	1	29446985	29450515	+	AT1G78260	RNA-binding (RRM/RBD/RNP motifs) family protein	50	13	46	13	35	21	30.7	0.327	-1.613	-3.488	0.000486183	0.0125447	0	0.3062	0.112	0.112	TRUE	0.402	GO:0090558 [Name: plant epidermis development]; GO:0030154 [Name: cell differentiation]; GO:0009826 [Name: unidimensional cell growth]; GO:0010015 [Name: root morphogenesis]; GO:0009737 [Name: response to abscisic acid]	GO:0005634 [Name: nucleus]; GO:0005739 [Name: mitochondrion]	GO:0003723 [Name: RNA binding]; GO:0003729 [Name: mRNA binding]	-
AT1G72416.1	1	27258839	27260291	-	AT1G72416	Chaperone DnaJ-domain superfamily protein	58	19	60	18	39	30	40.5	0.323	-1.63	-3.604	0.000313811	0.00885528	0.0528	0.2342	0.1146	0.1146	TRUE	0.3357	GO:0098542 [Name: defense response to other organism]; GO:0009611 [Name: response to wounding]; GO:0009416 [Name: response to light stimulus]; GO:0009832 [Name: plant-type cell wall biogenesis]; GO:0010035 [Name: response to inorganic substance]; GO:0040007 [Name: growth]; GO:0009753 [Name: response to jasmonic acid]	GO:0005737 [Name: cytoplasm]	GO:0003674 [Name: molecular_function]	-
AT3G02380.1	3	487236	488693	-	COL2	CONSTANS-like 2	196	48	181	51	122	87	117.78	0.322	-1.634	-5.142	2.71536e-07	2.71605e-05	0.0453	0.0862	0.0614	0.0614	TRUE	0.705	GO:0009658 [Name: chloroplast organization]; GO:0009909 [Name: regulation of flower development]	GO:0005634 [Name: nucleus]	GO:0008270 [Name: zinc ion binding]; GO:0003700 [Name: transcription factor activity sequence-specific DNA binding]; GO:0003677 [Name: DNA binding]	-
AT3G28890.2	3	10896289	10898841	-	AtRLP43	receptor like protein 43	170	30	97	57	76	41	78.8	0.321	-1.641	-5.136	2.81005e-07	2.78705e-05	0.0276	0.1246	0.057	0.057	TRUE	0.56	GO:0007165 [Name: signal transduction]	GO:0016021 [Name: integral component of membrane]; GO:0005886 [Name: plasma membrane]	GO:0016301 [Name: kinase activity]	-
AT2G35859.1	2	15059337	15061100	-	AT2G35859		159	23	131	35	78	59	77.39	0.319	-1.65	-4.797	1.61175e-06	0.000120272	0.035	0.1267	0.0686	0.0686	TRUE	0.7029	-	-	-	-
AT4G12310.1	4	7310416	7312577	-	CYP706A5	cytochrome P450 family 706 subfamily A polypeptide 5	109	16	85	33	44	37	52.41	0.319	-1.65	-4.616	3.91412e-06	0.00025917	0	0.1829	0.068	0.068	TRUE	0.3622	GO:0009416 [Name: response to light stimulus]; GO:0015994 [Name: chlorophyll metabolic process]; GO:0009266 [Name: response to temperature stimulus]; GO:0042440 [Name: pigment metabolic process]	GO:0016021 [Name: integral component of membrane]	GO:0020037 [Name: heme binding]; GO:0005506 [Name: iron ion binding]; GO:0004497 [Name: monooxygenase activity]; GO:0016705 [Name: oxidoreductase activity acting on paired donors with incorporation or reduction of molecular oxygen]	-
AT3G16280.1	3	5518331	5519246	+	ERF036	Integrase-type DNA-binding superfamily protein	161	41	118	51	88	55	90.85	0.314	-1.67	-5.588	2.2945e-08	3.08197e-06	0.0207	0.1092	0.0497	0.0497	TRUE	0.2114	GO:0009873 [Name: ethylene-activated signaling pathway]	GO:0005634 [Name: nucleus]	GO:0000976 [Name: transcription regulatory region sequence-specific DNA binding]; GO:0003700 [Name: transcription factor activity sequence-specific DNA binding]; GO:0003677 [Name: DNA binding]	-
AT4G32810.1	4	15828228	15831485	+	CCD8	carotenoid cleavage dioxygenase 8	112	32	95	45	65	37	69.23	0.314	-1.67	-5.072	3.93339e-07	3.71319e-05	0.0206	0.1406	0.0589	0.0589	TRUE	0.3845	GO:0009965 [Name: leaf morphogenesis]; GO:0010223 [Name: secondary shoot formation]; GO:0009733 [Name: response to auxin]; GO:1901601 [Name: strigolactone biosynthetic process]; GO:0009926 [Name: auxin polar transport]; GO:0016121 [Name: carotene catabolic process]; GO:0016124 [Name: xanthophyll catabolic process]	GO:0009570 [Name: chloroplast stroma]; GO:0009507 [Name: chloroplast]	GO:0010436 [Name: carotenoid dioxygenase activity]; GO:0046872 [Name: metal ion binding]; GO:0102396 [Name: 9-cis-10'-apo-beta-carotenal cleavage oxygenase activity]; GO:0102251 [Name: all-trans-beta-apo-10'-carotenal cleavage oxygenase activity]; GO:0016702 [Name: oxidoreductase activity acting on single donors with incorporation of molecular oxygen incorporation of two atoms of oxygen]	ath00906 [Pathway Title: Carotenoid biosynthesis]
AT1G79410.1	1	29867880	29869633	-	OCT5	organic cation/carnitine transporter5	80	14	67	27	45	20	41.11	0.313	-1.678	-4.719	2.37259e-06	0.000167982	0	0.2308	0.0607	0.0607	TRUE	0.0468	GO:0006811 [Name: ion transport]; GO:0070417 [Name: cellular response to cold]; GO:0042631 [Name: cellular response to water deprivation]; GO:0071472 [Name: cellular response to salt stress]	GO:0009705 [Name: plant-type vacuole membrane]; GO:0005739 [Name: mitochondrion]; GO:0016021 [Name: integral component of membrane]	GO:0022857 [Name: transmembrane transporter activity]; GO:0005524 [Name: ATP binding]	-
AT3G28345.1	3	10593753	10598775	-	ABCB15	ABC transporter family protein	435	74	325	137	191	130	213.8	0.31	-1.689	-8.612	7.15525e-18	6.22931e-15	0.0084	0.0514	0.0216	0.0216	TRUE	0.1936	GO:0055085 [Name: transmembrane transport]	GO:0016021 [Name: integral component of membrane]	GO:0042626 [Name: ATPase activity coupled to transmembrane movement of substances]; GO:0005524 [Name: ATP binding]	ath02010 [Pathway Title: ABC transporters]
AT1G22230.1	1	7849861	7851122	+	AT1G22230	nucleolar GTP-binding protein	37	13	40	12	30	15	26.63	0.309	-1.696	-3.348	0.000813949	0.018776	0	0.3516	0.1346	0.1346	TRUE	0.2013	GO:0044550 [Name: secondary metabolite biosynthetic process]; GO:0010015 [Name: root morphogenesis]; GO:0048589 [Name: developmental growth]; GO:0019438 [Name: aromatic compound biosynthetic process]; GO:0090558 [Name: plant epidermis development]; GO:0009832 [Name: plant-type cell wall biogenesis]; GO:0009059 [Name: macromolecule biosynthetic process]; GO:1901362 [Name: organic cyclic compound b…	GO:0005634 [Name: nucleus]	GO:0003674 [Name: molecular_function]	-
AT1G36940.1	1	14003903	14004911	+	AT1G36940	myotubularin-like protein	50	19	42	15	25	29	35.05	0.308	-1.698	-2.998	0.00271931	0.0469311	0.1506	0.2692	0.1918	0.1918	TRUE	1.2614	GO:0032870 [Name: cellular response to hormone stimulus]; GO:0048589 [Name: developmental growth]; GO:0071396 [Name: cellular response to lipid]; GO:1901701 [Name: cellular response to oxygen-containing compound]; GO:0071407 [Name: cellular response to organic cyclic compound]	GO:0005739 [Name: mitochondrion]	GO:0003674 [Name: molecular_function]	-
AT3G22235.1	3	7854419	7855791	-	AT3G22235	cysteine-rich TM module stress tolerance protein	154	20	189	59	112	27	84.61	0.308	-1.7	-3.948	7.89633e-05	0.00295089	0.119	0.1166	0.118	0.118	TRUE	0.1497	GO:0008150 [Name: biological_process]	GO:0005829 [Name: cytosol]; GO:0005886 [Name: plasma membrane]; GO:0016021 [Name: integral component of membrane]	GO:0003674 [Name: molecular_function]	-
AT1G01070.1	1	38752	40944	-	AT1G01070	nodulin MtN21 /EamA-like transporter family protein	68	25	63	32	42	24	47.89	0.306	-1.71	-4.009	6.09819e-05	0.00238907	0.0553	0.1994	0.1025	0.1025	1	0.7137	GO:0048316 [Name: seed development]	GO:0016021 [Name: integral component of membrane]; GO:0005886 [Name: plasma membrane]	GO:0022857 [Name: transmembrane transporter activity]; GO:0015186 [Name: L-glutamine transmembrane transporter activity]	-
AT3G12280.2	3	3913463	3919170	-	RBR1	retinoblastoma-related 1	45	11	60	13	30	22	30.52	0.305	-1.712	-3.534	0.000409307	0.0109207	0.0403	0.3079	0.1263	0.1263	TRUE	0.3044	GO:0007049 [Name: cell cycle]; GO:0051726 [Name: regulation of cell cycle]; GO:0006357 [Name: regulation of transcription from RNA polymerase II promoter]	GO:0005634 [Name: nucleus]	GO:0003677 [Name: DNA binding]; GO:0008134 [Name: transcription factor binding]; GO:0005515 [Name: protein binding]	-
AT2G22930.1	2	9759673	9761163	+	UGT79B8	UDP-Glycosyltransferase superfamily protein	41	8	20	11	17	11	18.74	0.305	-1.714	-2.981	0.00286994	0.0483244	0	0.4961	0.1681	0.1681	TRUE	0.76	GO:0009611 [Name: response to wounding]; GO:0006576 [Name: cellular biogenic amine metabolic process]; GO:0019438 [Name: aromatic compound biosynthetic process]; GO:0009753 [Name: response to jasmonic acid]; GO:0019761 [Name: glucosinolate biosynthetic process]; GO:0019752 [Name: carboxylic acid metabolic process]; GO:0090558 [Name: plant epidermis development]; GO:0030154 [Name: cell differentia…	GO:0009507 [Name: chloroplast]	GO:0008194 [Name: UDP-glycosyltransferase activity]	-
AT1G49320.1	1	18246305	18247992	+	ATUSPL1	unknown seed protein like 1	40	7	40	17	16	12	21.8	0.3	-1.737	-3.335	0.000851669	0.0193415	0	0.4277	0.1367	0.1367	TRUE	0.4274	GO:0048316 [Name: seed development]	GO:0000326 [Name: protein storage vacuole]; GO:0005795 [Name: Golgi stack]	GO:0003674 [Name: molecular_function]	-
AT2G10940.1	2	4310412	4312103	-	AT2G10940	Bifunctional inhibitor/lipid-transfer protein/seed storage 2S albumin superfamily protein	973	236	780	274	591	312	548.81	0.3	-1.739	-8.948	3.60359e-19	3.85027e-16	0.0247	0.0253	0.0247	0.0247	TRUE	0.37	GO:0009642 [Name: response to light intensity]	GO:0009507 [Name: chloroplast]; GO:0009535 [Name: chloroplast thylakoid membrane]; GO:0009506 [Name: plasmodesma]; GO:0048046 [Name: apoplast]; GO:0005739 [Name: mitochondrion]; GO:0099503 [Name: secretory vesicle]	-	-
AT5G44130.1	5	17761090	17762003	+	FLA13	FASCICLIN-like arabinogalactan protein 13 precursor	551	143	559	156	311	238	342.59	0.298	-1.748	-6.842	7.82163e-12	2.70375e-09	0.0498	0.0354	0.043	0.043	TRUE	0.3441	GO:0009834 [Name: plant-type secondary cell wall biogenesis]	GO:0009506 [Name: plasmodesma]; GO:0031225 [Name: anchored component of membrane]; GO:0046658 [Name: anchored component of plasma membrane]; GO:0009505 [Name: plant-type cell wall]; GO:0009536 [Name: plastid]; GO:0005794 [Name: Golgi apparatus]; GO:0005886 [Name: plasma membrane]	GO:0003674 [Name: molecular_function]	-
AT4G36870.2	4	17368965	17373930	+	BLH2	BEL1-like homeodomain 2	301	38	227	66	168	66	134.09	0.295	-1.761	-6.325	2.52766e-10	5.60268e-08	0.0296	0.0768	0.0459	0.0459	TRUE	0.2056	GO:0006355 [Name: regulation of transcription DNA-templated]; GO:0009965 [Name: leaf morphogenesis]; GO:0048363 [Name: mucilage pectin metabolic process]; GO:0006357 [Name: regulation of transcription from RNA polymerase II promoter]	GO:0005634 [Name: nucleus]	GO:0003677 [Name: DNA binding]; GO:0003700 [Name: transcription factor activity sequence-specific DNA binding]; GO:0000978 [Name: RNA polymerase II core promoter proximal region sequence-specific DNA binding]; GO:0000976 [Name: transcription regulatory region sequence-specific DNA binding]; GO:0000981 [Name: RNA polymerase II transcription factor activity sequence-specific DNA binding]	-
AT5G05440.1	5	1609250	1610446	+	PYL5	Polyketide cyclase/dehydrase and lipid transport superfamily protein	66	26	82	31	24	41	52.25	0.294	-1.768	-3.208	0.00133821	0.0272111	0.1976	0.1835	0.1921	0.1921	TRUE	0.2821	GO:0009738 [Name: abscisic acid-activated signaling pathway]; GO:0080163 [Name: regulation of protein serine/threonine phosphatase activity]	GO:0005737 [Name: cytoplasm]; GO:0005886 [Name: plasma membrane]; GO:0005634 [Name: nucleus]	GO:0004864 [Name: protein phosphatase inhibitor activity]; GO:0010427 [Name: abscisic acid binding]; GO:0038023 [Name: signaling receptor activity]	ath04075 [Pathway Title: Plant hormone signal transduction]
AT5G45820.1	5	18586980	18588543	-	CIPK20	CBL-interacting protein kinase 20	56	14	38	19	17	21	30.4	0.29	-1.784	-3.355	0.000792939	0.0184296	0.0837	0.3091	0.1584	0.1584	TRUE	0.365	GO:0009737 [Name: response to abscisic acid]; GO:0007165 [Name: signal transduction]	GO:0005829 [Name: cytosol]; GO:0005634 [Name: nucleus]	GO:0005524 [Name: ATP binding]; GO:0004674 [Name: protein serine/threonine kinase activity]; GO:0004712 [Name: protein serine/threonine/tyrosine kinase activity]	-
AT1G06830.1	1	2097151	2097655	+	GRXS11	Glutaredoxin family protein	27	6	22	8	12	9	14.58	0.29	-1.786	-2.989	0.00280324	0.0478691	0	0.6352	0.1675	0.1675	TRUE	0.0838	GO:0006995 [Name: cellular response to nitrogen starvation]	GO:0005634 [Name: nucleus]; GO:0005737 [Name: cytoplasm]	GO:0097573 [Name: glutathione oxidoreductase activity]; GO:0051537 [Name: 2 iron 2 sulfur cluster binding]; GO:0046872 [Name: metal ion binding]	-
AT1G11545.1	1	3878550	3880361	-	XTH8	xyloglucan endotransglucosylase/hydrolase 8	127	27	155	43	82	39	78.13	0.287	-1.799	-6.039	1.55112e-09	2.72095e-07	0	0.1256	0.0471	0.0471	TRUE	0.2096	GO:0042546 [Name: cell wall biogenesis]; GO:0010411 [Name: xyloglucan metabolic process]; GO:0071555 [Name: cell wall organization]	GO:0048046 [Name: apoplast]	GO:0016762 [Name: xyloglucan:xyloglucosyl transferase activity]; GO:0004553 [Name: hydrolase activity hydrolyzing O-glycosyl compounds]	-
AT5G54610.1	5	22184779	22186525	-	ANK	ankyrin	113	29	152	48	81	32	76.81	0.287	-1.8	-5.443	5.23504e-08	6.18366e-06	0.0319	0.1276	0.0613	0.0613	TRUE	0.4037	GO:0045087 [Name: innate immune response]; GO:0009751 [Name: response to salicylic acid]	GO:0016021 [Name: integral component of membrane]; GO:0005886 [Name: plasma membrane]	-	-
AT5G57780.1	5	23405324	23406351	-	AT5G57780	transcription factor	79	28	79	13	48	47	55.24	0.287	-1.801	-3.154	0.00160991	0.0314568	0.229	0.174	0.2093	0.2093	TRUE	1.4731	GO:0006355 [Name: regulation of transcription DNA-templated]	GO:0005739 [Name: mitochondrion]	-	-
AT2G35700.1	2	15005205	15005789	+	ERF038	ERF family protein 38	40	10	43	14	25	11	24.54	0.284	-1.817	-3.85	0.000118138	0.00408978	0	0.3808	0.1068	0.1068	TRUE	0.1899	GO:0009834 [Name: plant-type secondary cell wall biogenesis]; GO:0009873 [Name: ethylene-activated signaling pathway]	GO:0005634 [Name: nucleus]	GO:0000976 [Name: transcription regulatory region sequence-specific DNA binding]; GO:0003700 [Name: transcription factor activity sequence-specific DNA binding]; GO:0003677 [Name: DNA binding]	-
AT5G10770.1	5	3403110	3405448	-	AT5G10770	Eukaryotic aspartyl protease family protein	3493	661	3015	846	1718	1077	1813.72	0.279	-1.843	-12.398	2.68289e-35	3.1532e-31	0.0152	0.0137	0.0151	0.0151	TRUE	0.3151	GO:0006952 [Name: defense response]; GO:1901362 [Name: organic cyclic compound biosynthetic process]; GO:0006721 [Name: terpenoid metabolic process]; GO:0043436 [Name: oxoacid metabolic process]; GO:0044550 [Name: secondary metabolite biosynthetic process]; GO:0019438 [Name: aromatic compound biosynthetic process]	GO:0005886 [Name: plasma membrane]; GO:0031225 [Name: anchored component of membrane]	GO:0004190 [Name: aspartic-type endopeptidase activity]; GO:0003677 [Name: DNA binding]	-
AT5G57520.1	5	23295964	23296683	+	ZFP2	zinc finger protein 2	135	25	108	19	74	45	67.54	0.277	-1.85	-4.391	1.1266e-05	0.000610825	0.0837	0.1439	0.1074	0.1074	TRUE	1.3612	GO:0060862 [Name: negative regulation of floral organ abscission]; GO:0006355 [Name: regulation of transcription DNA-templated]	GO:0005634 [Name: nucleus]	GO:0046872 [Name: metal ion binding]; GO:0003700 [Name: transcription factor activity sequence-specific DNA binding]	-
AT5G53250.1	5	21603620	21604231	+	AGP22	arabinogalactan protein 22	66	19	73	23	50	15	42.75	0.277	-1.851	-4.397	1.09761e-05	0.00060001	0.034	0.2223	0.0958	0.0958	TRUE	0.2203	GO:0098542 [Name: defense response to other organism]; GO:0033993 [Name: response to lipid]; GO:0014070 [Name: response to organic cyclic compound]; GO:0010035 [Name: response to inorganic substance]	GO:0031225 [Name: anchored component of membrane]; GO:0005886 [Name: plasma membrane]; GO:0016021 [Name: integral component of membrane]	-	-
AT3G13640.1	3	4458461	4461733	-	ABCE1	RNAse l inhibitor protein 1	85	12	79	22	49	16	41.26	0.271	-1.882	-4.684	2.80958e-06	0.000193672	0	0.23	0.0844	0.0844	TRUE	0.4198	GO:0000054 [Name: ribosomal subunit export from nucleus]; GO:0006413 [Name: translational initiation]; GO:0006415 [Name: translational termination]	GO:0016020 [Name: membrane]	GO:0046872 [Name: metal ion binding]; GO:0051536 [Name: iron-sulfur cluster binding]; GO:0005524 [Name: ATP binding]; GO:0051539 [Name: 4 iron 4 sulfur cluster binding]; GO:0005506 [Name: iron ion binding]; GO:0043024 [Name: ribosomal small subunit binding]	-
AT4G12730.1	4	7491383	7492876	-	FLA2	FASCICLIN-like arabinogalactan 2	1129	254	955	271	449	429	615.92	0.271	-1.885	-7.138	9.48499e-13	3.84404e-10	0.0656	0.0235	0.0479	0.0479	TRUE	1.5558	GO:0009834 [Name: plant-type secondary cell wall biogenesis]; GO:0014070 [Name: response to organic cyclic compound]; GO:0009059 [Name: macromolecule biosynthetic process]; GO:0009753 [Name: response to jasmonic acid]; GO:0010015 [Name: root morphogenesis]; GO:0048588 [Name: developmental cell growth]; GO:0051301 [Name: cell division]; GO:0000902 [Name: cell morphogenesis]; GO:0030154 [Name: cell…	GO:0005886 [Name: plasma membrane]; GO:0046658 [Name: anchored component of plasma membrane]; GO:0005829 [Name: cytosol]; GO:0031225 [Name: anchored component of membrane]; GO:0000325 [Name: plant-type vacuole]	-	-
AT2G41380.1	2	17251941	17253057	+	AT2G41380	S-adenosyl-L-methionine-dependent methyltransferases superfamily protein	148	32	131	43	87	31	80.06	0.269	-1.892	-6.472	9.69078e-11	2.34312e-08	0	0.1228	0.0446	0.0446	TRUE	0.2908	GO:0032259 [Name: methylation]	GO:0005739 [Name: mitochondrion]	GO:0008168 [Name: methyltransferase activity]	-
AT4G17460.1	4	9739663	9741146	+	HAT1	Homeobox-leucine zipper protein 4 (HB-4) / HD-ZIP protein	135	22	117	20	76	39	66.27	0.268	-1.901	-4.761	1.92272e-06	0.000141236	0.0605	0.1465	0.0939	0.0939	TRUE	1.105	GO:0003006 [Name: developmental process involved in reproduction]; GO:0080127 [Name: fruit septum development]; GO:0010582 [Name: floral meristem determinacy]; GO:0048467 [Name: gynoecium development]	GO:0005634 [Name: nucleus]	GO:0043621 [Name: protein self-association]; GO:0000976 [Name: transcription regulatory region sequence-specific DNA binding]; GO:0003700 [Name: transcription factor activity sequence-specific DNA binding]; GO:0000981 [Name: RNA polymerase II transcription factor activity sequence-specific DNA binding]	-
AT2G25850.1	2	11025856	11030627	-	PAPS2	poly(A) polymerase 2	39	14	30	7	33	11	25.15	0.267	-1.906	-3.027	0.00247031	0.0436924	0.1536	0.3718	0.2284	0.2284	TRUE	1.1867	GO:0043631 [Name: RNA polyadenylation]; GO:0006378 [Name: mRNA polyadenylation]	GO:0005737 [Name: cytoplasm]; GO:0005634 [Name: nucleus]	GO:0003723 [Name: RNA binding]; GO:0005524 [Name: ATP binding]; GO:0004652 [Name: polynucleotide adenylyltransferase activity]; GO:0046872 [Name: metal ion binding]	ath03015 [Pathway Title: mRNA surveillance pathway]
AT4G10120.2	4	6314787	6319936	+	SPS4	Sucrose-phosphate synthase family protein	63	43	114	39	76	27	72.35	0.265	-1.919	-3.682	0.000231421	0.0069355	0.1992	0.1349	0.1753	0.1753	TRUE	0.126	GO:0005986 [Name: sucrose biosynthetic process]	GO:0005829 [Name: cytosol]	GO:0016157 [Name: sucrose synthase activity]; GO:0046524 [Name: sucrose-phosphate synthase activity]	ath00500 [Pathway Title: Starch and sucrose metabolism]; ath01100 [Pathway Title: Metabolic pathways]
AT1G75750.1	1	28441526	28442367	-	GASA1	GAST1 protein homolog 1	33	15	35	11	28	10	25.65	0.263	-1.927	-3.354	0.000797841	0.0185134	0.0959	0.3648	0.1815	0.1815	TRUE	0.5306	GO:0009737 [Name: response to abscisic acid]; GO:0009740 [Name: gibberellic acid mediated signaling pathway]; GO:0009826 [Name: unidimensional cell growth]; GO:0009739 [Name: response to gibberellin]; GO:0009741 [Name: response to brassinosteroid]	GO:0009505 [Name: plant-type cell wall]; GO:0005739 [Name: mitochondrion]; GO:0005576 [Name: extracellular region]; GO:0016021 [Name: integral component of membrane]	-	-
AT1G72510.2	1	27303366	27304850	+	AT1G72510	DUF1677 family protein (DUF1677)	109	35	66	29	67	26	62.92	0.263	-1.928	-4.343	1.40658e-05	0.000726326	0.1002	0.1538	0.1189	0.1189	TRUE	0.2408	GO:0009620 [Name: response to fungus]; GO:0030154 [Name: cell differentiation]; GO:0071395 [Name: cellular response to jasmonic acid stimulus]; GO:0098542 [Name: defense response to other organism]; GO:0009826 [Name: unidimensional cell growth]; GO:0009611 [Name: response to wounding]; GO:1905392 [Name: plant organ morphogenesis]	GO:0005634 [Name: nucleus]	GO:0003674 [Name: molecular_function]	-
AT1G56430.1	1	21136944	21138087	+	NAS4	nicotianamine synthase 4	48	15	28	20	23	7	27.02	0.26	-1.945	-3.225	0.00125774	0.0260939	0.1336	0.3467	0.2082	0.2082	TRUE	0.1703	GO:0030418 [Name: nicotianamine biosynthetic process]; GO:0010233 [Name: phloem transport]; GO:0009555 [Name: pollen development]; GO:0009860 [Name: pollen tube growth]	GO:0005634 [Name: nucleus]	GO:0030410 [Name: nicotianamine synthase activity]	-
AT5G01015.1	5	5256	5891	-	AT5G01015	uncharacterized protein	46	17	40	9	35	14	30.36	0.256	-1.966	-3.538	0.000403689	0.01082	0.1034	0.3095	0.1747	0.1747	TRUE	0.721	GO:0008150 [Name: biological_process]	GO:0016021 [Name: integral component of membrane]	GO:0003674 [Name: molecular_function]	-
AT1G76240.1	1	28602811	28603929	-	AT1G76240	DUF241 domain protein (DUF241)	258	72	290	69	127	101	165.12	0.253	-1.98	-6.719	1.83325e-11	5.67006e-09	0.0471	0.064	0.0538	0.0538	TRUE	0.2504	GO:0009888 [Name: tissue development]; GO:0009642 [Name: response to light intensity]; GO:0048364 [Name: root development]; GO:1905392 [Name: plant organ morphogenesis]; GO:0030154 [Name: cell differentiation]; GO:0071695 [Name: anatomical structure maturation]; GO:0009639 [Name: response to red or far red light]; GO:0048367 [Name: shoot system development]	GO:0005634 [Name: nucleus]	GO:0003674 [Name: molecular_function]	-
AT3G15510.1	3	5243510	5245382	+	ATNAC2	NAC domain containing protein 2	60	13	46	16	31	11	30.67	0.253	-1.985	-4.499	6.82905e-06	0.000403326	0	0.3064	0.0948	0.0948	TRUE	0.1685	GO:0080060 [Name: integument development]; GO:0048731 [Name: system development]; GO:0048317 [Name: seed morphogenesis]; GO:0009753 [Name: response to jasmonic acid]; GO:0045995 [Name: regulation of embryonic development]; GO:0006355 [Name: regulation of transcription DNA-templated]	GO:0005634 [Name: nucleus]	GO:0000976 [Name: transcription regulatory region sequence-specific DNA binding]; GO:0003700 [Name: transcription factor activity sequence-specific DNA binding]; GO:0003677 [Name: DNA binding]	-
AT5G16080.1	5	5252315	5253618	-	CXE17	carboxyesterase 17	45	9	29	13	15	10	21.35	0.252	-1.991	-3.778	0.000157797	0.00509502	0	0.4365	0.1345	0.1345	TRUE	0.2715	GO:0016192 [Name: vesicle-mediated transport]; GO:0043170 [Name: macromolecule metabolic process]; GO:0009737 [Name: response to abscisic acid]; GO:0010150 [Name: leaf senescence]; GO:0031347 [Name: regulation of defense response]; GO:0007165 [Name: signal transduction]; GO:0048827 [Name: phyllome development]; GO:0006259 [Name: DNA metabolic process]; GO:0006970 [Name: response to osmotic stress…	GO:0005575 [Name: cellular_component]	GO:0080030 [Name: methyl indole-3-acetate esterase activity]; GO:0016787 [Name: hydrolase activity]	-
AT5G56840.1	5	22980693	22982342	+	AT5G56840	myb-like transcription factor family protein	79	15	70	22	33	19	40.44	0.249	-2.003	-5.511	3.57404e-08	4.44504e-06	0	0.2345	0.0613	0.0613	TRUE	0.0282	GO:0006355 [Name: regulation of transcription DNA-templated]	GO:0005634 [Name: nucleus]	GO:0003700 [Name: transcription factor activity sequence-specific DNA binding]; GO:0008270 [Name: zinc ion binding]; GO:0003677 [Name: DNA binding]	-
AT2G22122.1	2	9403264	9403808	+	AT2G22122	uncharacterized protein	60	18	50	13	31	19	35.47	0.248	-2.011	-4.447	8.69547e-06	0.000497313	0.0263	0.2662	0.1066	0.1066	TRUE	0.2931	GO:0098771 [Name: inorganic ion homeostasis]; GO:0033993 [Name: response to lipid]; GO:1901701 [Name: cellular response to oxygen-containing compound]	GO:0005575 [Name: cellular_component]	GO:0003674 [Name: molecular_function]	-
AT3G22231.1	3	7845823	7846605	-	PCC1	pathogen and circadian controlled 1	325	49	418	82	184	76	179.74	0.246	-2.025	-6.635	3.2415e-11	9.18008e-09	0.0588	0.0595	0.0591	0.0591	TRUE	0.295	GO:0006952 [Name: defense response]; GO:1902290 [Name: positive regulation of defense response to oomycetes]; GO:0006629 [Name: lipid metabolic process]; GO:0055088 [Name: lipid homeostasis]; GO:0009737 [Name: response to abscisic acid]; GO:0009863 [Name: salicylic acid mediated signaling pathway]; GO:0071494 [Name: cellular response to UV-C]; GO:0007623 [Name: circadian rhythm]; GO:0010513 [Name…	GO:0016021 [Name: integral component of membrane]; GO:0005886 [Name: plasma membrane]; GO:0016020 [Name: membrane]	GO:0003674 [Name: molecular_function]	-
AT1G67105.1	1	25057479	25058264	+	AT1G67105		37	10	28	12	17	7	20.38	0.245	-2.027	-3.699	0.000216416	0.00659802	0	0.4567	0.1458	0.1458	TRUE	0.2027	-	-	-	-
AT5G28770.1	5	10796459	10798207	-	BZIP63	bZIP transcription factor family protein	27	12	36	6	28	8	22	0.244	-2.038	-3.078	0.002086	0.0383074	0.1604	0.4237	0.2484	0.2484	TRUE	0.2181	GO:0071215 [Name: cellular response to abscisic acid stimulus]; GO:0009267 [Name: cellular response to starvation]; GO:0009649 [Name: entrainment of circadian clock]; GO:0071333 [Name: cellular response to glucose stimulus]	GO:0005634 [Name: nucleus]	GO:0003677 [Name: DNA binding]; GO:0003700 [Name: transcription factor activity sequence-specific DNA binding]; GO:0042802 [Name: identical protein binding]; GO:0019900 [Name: kinase binding]; GO:0043621 [Name: protein self-association]; GO:0046982 [Name: protein heterodimerization activity]	-
AT4G03210.2	4	1415953	1417352	+	XTH9	xyloglucan endotransglucosylase/hydrolase 9	19	7	33	6	10	10	15.74	0.236	-2.085	-3.053	0.00226589	0.0407514	0	0.5889	0.2427	0.2427	TRUE	1.0049	GO:0071555 [Name: cell wall organization]; GO:0010411 [Name: xyloglucan metabolic process]; GO:0042546 [Name: cell wall biogenesis]	GO:0048046 [Name: apoplast]	GO:0016762 [Name: xyloglucan:xyloglucosyl transferase activity]; GO:0004553 [Name: hydrolase activity hydrolyzing O-glycosyl compounds]	-
AT1G65390.1	1	24292478	24294631	+	PP2A5	phloem protein 2 A5	68	18	56	19	22	21	38.08	0.235	-2.09	-4.673	2.96799e-06	0.000203398	0.0323	0.2485	0.1052	0.1052	TRUE	0.5238	GO:0032260 [Name: response to jasmonic acid stimulus involved in jasmonic acid and ethylene-dependent systemic resistance]; GO:0002213 [Name: defense response to insect]; GO:0009863 [Name: salicylic acid mediated signaling pathway]; GO:0009867 [Name: jasmonic acid mediated signaling pathway]	GO:0005737 [Name: cytoplasm]; GO:0005634 [Name: nucleus]; GO:0012505 [Name: endomembrane system]	GO:0030246 [Name: carbohydrate binding]; GO:0050135 [Name: NAD(P)+ nucleosidase activity]; GO:0061809 [Name: NAD+ nucleotidase cyclic ADP-ribose generating]	-
AT1G03870.1	1	982506	983540	-	FLA9	FASCICLIN-like arabinoogalactan 9	398	75	471	73	166	143	223.72	0.235	-2.092	-6.344	2.23243e-10	4.99767e-08	0.0867	0.0495	0.0716	0.0716	TRUE	1.5114	GO:0009834 [Name: plant-type secondary cell wall biogenesis]	GO:0031225 [Name: anchored component of membrane]; GO:0046658 [Name: anchored component of plasma membrane]; GO:0005576 [Name: extracellular region]; GO:0099503 [Name: secretory vesicle]; GO:0005886 [Name: plasma membrane]	-	-
AT5G45095.1	5	18207363	18209045	+	AT5G45095	uncharacterized protein	46	7	38	9	13	14	21.34	0.234	-2.096	-3.784	0.000154372	0.0049945	0	0.4366	0.1546	0.1546	TRUE	0.5283	GO:0006952 [Name: defense response]; GO:0044550 [Name: secondary metabolite biosynthetic process]; GO:0048878 [Name: chemical homeostasis]; GO:0042435 [Name: indole-containing compound biosynthetic process]	GO:0005739 [Name: mitochondrion]	GO:0003674 [Name: molecular_function]	-
AT5G59990.1	5	24150983	24153084	-	AT5G59990	CCT motif family protein	33	8	29	7	17	7	17.94	0.228	-2.134	-3.776	0.000159099	0.00513003	0	0.5178	0.1489	0.1489	TRUE	0.1747	GO:0009909 [Name: regulation of flower development]	GO:0005634 [Name: nucleus]	GO:0003674 [Name: molecular_function]	-
AT3G30775.1	3	12448636	12451248	-	POX1	Methylenetetrahydrofolate reductase family protein	680	123	506	135	223	154	316.07	0.218	-2.201	-11.915	9.83324e-33	4.6228e-29	0.0104	0.0376	0.0198	0.0198	TRUE	0.2606	GO:0009414 [Name: response to water deprivation]; GO:0071456 [Name: cellular response to hypoxia]; GO:0042742 [Name: defense response to bacterium]; GO:0006979 [Name: response to oxidative stress]; GO:0010133 [Name: proline catabolic process to glutamate]	GO:0005739 [Name: mitochondrion]	GO:0004657 [Name: proline dehydrogenase activity]; GO:0071949 [Name: FAD binding]	ath01100 [Pathway Title: Metabolic pathways]; ath01130 [Pathway Title: Biosynthesis of antibiotics]; ath00330 [Pathway Title: Arginine and proline metabolism]; ath01110 [Pathway Title: Biosynthesis of secondary metabolites]
AT3G17998.1	3	6154363	6157551	+	CPuORF30		177	32	210	30	126	25	96.68	0.216	-2.209	-4.831	1.35854e-06	0.000104701	0.1549	0.1031	0.1346	0.1346	TRUE	3.3676	-	-	-	-
AT2G45180.1	2	18626320	18626997	+	AT2G45180	Bifunctional inhibitor/lipid-transfer protein/seed storage 2S albumin superfamily protein	520	109	565	88	233	149	286.88	0.215	-2.219	-8.309	9.62994e-17	6.65769e-14	0.0495	0.0405	0.0459	0.0459	TRUE	0.5861	GO:0009651 [Name: response to salt stress]; GO:0002220 [Name: innate immune response activating cell surface receptor signaling pathway]	GO:0009535 [Name: chloroplast thylakoid membrane]	GO:0019904 [Name: protein domain specific binding]	-
AT5G22300.1	5	7379199	7381935	+	NIT4	nitrilase 4	345	67	334	81	143	65	177.58	0.21	-2.251	-11.677	1.67586e-31	6.56548e-28	0	0.0601	0.0183	0.0183	TRUE	0.0382	GO:0019499 [Name: cyanide metabolic process]; GO:0051410 [Name: detoxification of nitrogen compound]; GO:0006807 [Name: nitrogen compound metabolic process]	GO:0005886 [Name: plasma membrane]; GO:0005829 [Name: cytosol]	GO:0000257 [Name: nitrilase activity]; GO:0018822 [Name: nitrile hydratase activity]; GO:0047558 [Name: 3-cyanoalanine hydratase activity]; GO:0047427 [Name: cyanoalanine nitrilase activity]; GO:0080061 [Name: indole-3-acetonitrile nitrilase activity]; GO:0016836 [Name: hydro-lyase activity]	ath01100 [Pathway Title: Metabolic pathways]; ath01110 [Pathway Title: Biosynthesis of secondary metabolites]; ath00460 [Pathway Title: Cyanoamino acid metabolism]
AT3G26670.3	3	9797986	9801043	-	AT3G26670	magnesium transporter putative (DUF803)	64	25	62	8	20	34	43.97	0.207	-2.271	-3.339	0.000840276	0.0191625	0.3477	0.2164	0.2963	0.2963	TRUE	3.6029	GO:0015693 [Name: magnesium ion transport]	GO:0005886 [Name: plasma membrane]; GO:0016021 [Name: integral component of membrane]; GO:0005769 [Name: early endosome]	GO:0015095 [Name: magnesium ion transmembrane transporter activity]	-
AT2G26750.1	2	11395896	11397092	-	AT2G26750	alpha/beta-Hydrolases superfamily protein	31	6	29	9	10	5	15.66	0.202	-2.309	-3.811	0.000138609	0.00463463	0	0.592	0.1678	0.1678	TRUE	0.1817	GO:0030154 [Name: cell differentiation]	GO:0005777 [Name: peroxisome]	GO:0016787 [Name: hydrolase activity]	-
AT4G22120.6	4	11715781	11719797	-	CSC1	ERD (early-responsive to dehydration stress) family protein	94	15	54	31	14	10	38.44	0.2	-2.319	-3.826	0.000130007	0.00439359	0.2089	0.2463	0.2231	0.2231	TRUE	1.6915	GO:0006812 [Name: cation transport]	GO:0016021 [Name: integral component of membrane]; GO:0005886 [Name: plasma membrane]	GO:0042802 [Name: identical protein binding]; GO:0005227 [Name: calcium activated cation channel activity]; GO:0008381 [Name: mechanically-gated ion channel activity]	-
AT1G12672.1	1	4318426	4319035	+	AT1G12672	thionin-like protein	39	4	26	8	8	6	14.66	0.196	-2.353	-3.577	0.0003469	0.00951486	0	0.6315	0.2093	0.2093	TRUE	0.0781	GO:0009651 [Name: response to salt stress]; GO:0009414 [Name: response to water deprivation]; GO:0009737 [Name: response to abscisic acid]; GO:0009416 [Name: response to light stimulus]	GO:0005576 [Name: extracellular region]	GO:0003674 [Name: molecular_function]	-
AT2G40750.1	2	17000454	17002468	-	WRKY54	WRKY DNA-binding protein 54	53	13	67	21	18	8	32.19	0.194	-2.368	-4.567	4.94211e-06	0.000314822	0.0601	0.2924	0.1442	0.1442	TRUE	0.9351	GO:0050832 [Name: defense response to fungus]; GO:2000070 [Name: regulation of response to water deprivation]; GO:0009742 [Name: brassinosteroid mediated signaling pathway]; GO:0031347 [Name: regulation of defense response]; GO:2000031 [Name: regulation of salicylic acid mediated signaling pathway]; GO:2000022 [Name: regulation of jasmonic acid mediated signaling pathway]; GO:0047484 [Name: regul…	GO:0005634 [Name: nucleus]	GO:0003700 [Name: transcription factor activity sequence-specific DNA binding]; GO:0000976 [Name: transcription regulatory region sequence-specific DNA binding]; GO:0043565 [Name: sequence-specific DNA binding]	-
AT4G27040.1	4	13572889	13575538	-	VP22-1	EAP30/Vps36 family protein	51	14	60	7	33	10	31.21	0.193	-2.375	-4.322	1.5448e-05	0.000785973	0.0879	0.3013	0.1659	0.1659	TRUE	1.4061	GO:0071985 [Name: multivesicular body sorting pathway]; GO:0015031 [Name: protein transport]; GO:0043328 [Name: protein targeting to vacuole involved in ubiquitin-dependent protein catabolic process via the multivesicular body sorting pathway]	GO:0000814 [Name: ESCRT II complex]	GO:0003674 [Name: molecular_function]	ath04144 [Pathway Title: Endocytosis]
AT1G10380.1	1	3400606	3402324	+	AT1G10380	Putative membrane lipoprotein	36	12	41	5	27	6	23.49	0.191	-2.385	-3.648	0.000264092	0.00766099	0.1483	0.3974	0.2382	0.2382	TRUE	0.6201	GO:0006887 [Name: exocytosis]	GO:0000145 [Name: exocyst]	GO:0030247 [Name: polysaccharide binding]	-
AT2G29750.1	2	12709727	12711696	+	UGT71C1	UDP-glucosyl transferase 71C1	48	8	73	13	18	11	28.21	0.19	-2.399	-4.599	4.24031e-06	0.000276102	0	0.3324	0.1408	0.1408	TRUE	1.2341	-	-	GO:0008194 [Name: UDP-glycosyltransferase activity]; GO:0033836 [Name: flavonol 7-O-beta-glucosyltransferase activity]; GO:0035251 [Name: UDP-glucosyltransferase activity]; GO:0080044 [Name: quercetin 7-O-glucosyltransferase activity]; GO:0102425 [Name: myricetin 3-O-glucosyltransferase activity]; GO:0080045 [Name: quercetin 3'-O-glucosyltransferase activity]; GO:0102360 [Name: daphnetin 3-O-gluc…	-
AT1G70270.1	1	26464400	26464860	+	AT1G70270	transcription factor	41	13	51	8	15	14	26.89	0.187	-2.415	-4.498	6.86179e-06	0.000404244	0	0.3483	0.1469	0.1469	TRUE	0.3773	GO:0006355 [Name: regulation of transcription DNA-templated]	GO:0005575 [Name: cellular_component]	GO:0003674 [Name: molecular_function]	-
AT3G30720.1	3	12349047	12349832	+	QQS	qua-quine starch	498	82	433	75	176	73	226.76	0.175	-2.513	-11.975	4.78156e-33	2.80988e-29	0.0101	0.049	0.0244	0.0244	TRUE	0.3587	GO:2000905 [Name: negative regulation of starch metabolic process]; GO:0051247 [Name: positive regulation of protein metabolic process]; GO:0045087 [Name: innate immune response]; GO:0019252 [Name: starch biosynthetic process]	GO:0005634 [Name: nucleus]; GO:0005829 [Name: cytosol]	GO:0005515 [Name: protein binding]	-
AT1G34060.1	1	12396420	12398369	-	TAR4	Pyridoxal phosphate (PLP)-dependent transferases superfamily protein	486	68	362	82	121	68	200.45	0.17	-2.557	-12.429	1.8116e-35	3.1532e-31	0	0.0543	0.0221	0.0221	TRUE	0.1109	GO:0006520 [Name: cellular amino acid metabolic process]	GO:0016021 [Name: integral component of membrane]	GO:0016846 [Name: carbon-sulfur lyase activity]; GO:0008483 [Name: transaminase activity]	-
AT5G08750.2	5	2852108	2854513	+	AT5G08750	RING/FYVE/PHD zinc finger superfamily protein	77	27	32	6	22	23	40.8	0.169	-2.564	-3.581	0.000341672	0.00943754	0.3836	0.2325	0.325	0.325	TRUE	0.1469	GO:0008150 [Name: biological_process]	GO:0016021 [Name: integral component of membrane]	GO:0008270 [Name: zinc ion binding]	-
AT1G33440.1	1	12127389	12130407	-	NPF4.4	Major facilitator superfamily protein	22	8	17	4	6	6	13.29	0.168	-2.569	-3.427	0.000611284	0.0150459	0	0.6961	0.2699	0.2699	TRUE	0.3839	-	GO:0016021 [Name: integral component of membrane]	GO:0022857 [Name: transmembrane transporter activity]	-
AT2G38310.1	2	16050063	16051168	+	PYL4	PYR1-like 4	148	49	162	23	53	41	93.55	0.163	-2.616	-6.777	1.22602e-11	4.00261e-09	0.0764	0.1063	0.088	0.088	TRUE	0.1936	GO:0009738 [Name: abscisic acid-activated signaling pathway]; GO:0080163 [Name: regulation of protein serine/threonine phosphatase activity]	GO:0009705 [Name: plant-type vacuole membrane]; GO:0005886 [Name: plasma membrane]; GO:0005737 [Name: cytoplasm]; GO:0005634 [Name: nucleus]	GO:0010427 [Name: abscisic acid binding]; GO:0044389 [Name: ubiquitin-like protein ligase binding]; GO:0004864 [Name: protein phosphatase inhibitor activity]; GO:0038023 [Name: signaling receptor activity]; GO:0042803 [Name: protein homodimerization activity]	ath04075 [Pathway Title: Plant hormone signal transduction]
AT2G40070.2	2	16728194	16731606	-	AT2G40070	flocculation FLO11-like protein	81	31	32	2	14	26	43.64	0.133	-2.908	-3.199	0.00137961	0.0278601	0.7932	0.218	0.548	0.548	TRUE	0.3942	GO:0043622 [Name: cortical microtubule organization]; GO:0051211 [Name: anisotropic cell growth]	GO:0005634 [Name: nucleus]; GO:0005794 [Name: Golgi apparatus]; GO:0005875 [Name: microtubule associated complex]; GO:0055028 [Name: cortical microtubule]	GO:0003674 [Name: molecular_function]	-
AT1G53490.1	1	19963267	19966952	+	HEI10	RING/U-box superfamily protein	22	8	14	1	6	5	12.29	0.126	-2.986	-3.384	0.000713418	0.016888	0.1643	0.7515	0.3867	0.3867	TRUE	0.3286	GO:0035825 [Name: reciprocal DNA recombination]; GO:0051026 [Name: chiasma assembly]; GO:0007131 [Name: reciprocal meiotic recombination]; GO:0051321 [Name: meiotic cell cycle]; GO:0016567 [Name: protein ubiquitination]	GO:0005712 [Name: chiasma]; GO:0005694 [Name: chromosome]	GO:0046872 [Name: metal ion binding]; GO:0016740 [Name: transferase activity]	-
AT5G45890.1	5	18613259	18614930	+	SAG12	senescence-associated gene 12	108	21	85	5	23	10	46.8	0.092	-3.435	-7.468	8.14843e-14	3.48249e-11	0	0.2038	0.0991	0.0991	TRUE	0.6404	GO:0010623 [Name: programmed cell death involved in cell development]; GO:0009744 [Name: response to sucrose]; GO:0010224 [Name: response to UV-B]; GO:1990169 [Name: stress response to copper ion]; GO:0050832 [Name: defense response to fungus]; GO:0080187 [Name: floral organ senescence]; GO:0009626 [Name: plant-type hypersensitive response]; GO:0007568 [Name: aging]; GO:0009750 [Name: response to…	GO:0010282 [Name: senescence-associated vacuole]; GO:0005615 [Name: extracellular space]; GO:0005764 [Name: lysosome]	GO:0004197 [Name: cysteine-type endopeptidase activity]; GO:0008234 [Name: cysteine-type peptidase activity]	-
AT3G06080.1	3	1834707	1837984	-	TBL10	trichome birefringence-like protein (DUF828)	40	15	30	6	0	7	22.79	0.083	-3.594	-3.527	0.000420709	0.0111365	0.8798	0.4094	0.6236	0.6236	TRUE	2.57	GO:0007623 [Name: circadian rhythm]	GO:0016021 [Name: integral component of membrane]; GO:0005794 [Name: Golgi apparatus]	GO:0016413 [Name: O-acetyltransferase activity]	-
AT5G11930.1	5	3844940	3845645	-	GRXC10	Thioredoxin superfamily protein	22	4	20	2	2	1	9.5	0.061	-4.039	-4.25	2.13467e-05	0.00102823	0	0.9702	0.2981	0.2981	TRUE	0.0698	GO:0006355 [Name: regulation of transcription DNA-templated]; GO:0009416 [Name: response to light stimulus]; GO:0009611 [Name: response to wounding]; GO:0009753 [Name: response to jasmonic acid]; GO:0009813 [Name: flavonoid biosynthetic process]; GO:0006576 [Name: cellular biogenic amine metabolic process]; GO:0010051 [Name: xylem and phloem pattern formation]; GO:0098542 [Name: defense response …	GO:0005737 [Name: cytoplasm]	GO:0097573 [Name: glutathione oxidoreductase activity]	-
AT1G48610.2	1	17970680	17973303	-	AT1G48610	AT hook motif-containing protein	12	3	18	0	3	0	6.82	0.043	-4.528	-3.325	0.000885174	0.0199109	0	1.3486	0.6831	0.6831	TRUE	1.0065	GO:0016070 [Name: RNA metabolic process]; GO:0009888 [Name: tissue development]	GO:0005634 [Name: nucleus]	GO:0003677 [Name: DNA binding]	-
AT5G01240.2	5	98533	101835	+	LAX1	uncharacterized protein	23	14	33	6	0	0	19.2	0.041	-4.615	-3.602	0.000315544	0.00886161	1.7719	0.4843	0.9237	0.9237	TRUE	1.2175	GO:0006865 [Name: amino acid transport]	GO:0016021 [Name: integral component of membrane]	GO:0010328 [Name: auxin influx transmembrane transporter activity]	ath04075 [Pathway Title: Plant hormone signal transduction]
AT5G46295.1	5	18779796	18780205	-	AT5G46295	uncharacterized protein	53	5	53	3	4	0	19.7	0.038	-4.735	-5.478	4.29898e-08	5.20885e-06	0	0.4722	0.2872	0.2872	TRUE	0.318	GO:0031347 [Name: regulation of defense response]; GO:0044281 [Name: small molecule metabolic process]; GO:0009737 [Name: response to abscisic acid]; GO:0050832 [Name: defense response to fungus]; GO:0002237 [Name: response to molecule of bacterial origin]; GO:0042742 [Name: defense response to bacterium]; GO:0009611 [Name: response to wounding]; GO:0009651 [Name: response to salt stress]; GO:000…	GO:0016021 [Name: integral component of membrane]	GO:0003674 [Name: molecular_function]	-
AT1G29120.2	1	10174242	10178428	+	AT1G29120	Hydrolase-like protein family	13	19	13	4	0	0	18.18	0.029	-5.124	-3.481	0.000499356	0.0128003	2.1269	0.511	1.1838	1.1838	TRUE	4.2007	GO:0010114 [Name: response to red light]; GO:0009658 [Name: chloroplast organization]; GO:0009414 [Name: response to water deprivation]	GO:0005777 [Name: peroxisome]; GO:0005634 [Name: nucleus]; GO:0009507 [Name: chloroplast]	GO:0016787 [Name: hydrolase activity]	-
AT1G27770.2	1	9671638	9676157	-	ACA1	autoinhibited Ca2+-ATPase 1	156	26	233	0	20	2	77.79	0.026	-5.281	-6.504	7.83851e-11	2.0309e-08	0.9297	0.1261	0.3816	0.3816	TRUE	5.2782	GO:0009651 [Name: response to salt stress]; GO:1901701 [Name: cellular response to oxygen-containing compound]; GO:0050832 [Name: defense response to fungus]; GO:0070588 [Name: calcium ion transmembrane transport]; GO:0009755 [Name: hormone-mediated signaling pathway]; GO:0031347 [Name: regulation of defense response]; GO:0042742 [Name: defense response to bacterium]; GO:0009966 [Name: regulation…	GO:0016021 [Name: integral component of membrane]	GO:0005524 [Name: ATP binding]; GO:0005516 [Name: calmodulin binding]; GO:0005388 [Name: calcium-transporting ATPase activity]	-
AT1G12940.1	1	4416405	4418590	+	NRT2.5	nitrate transporter2.5	9	5	7	0	1	0	6.03	0.022	-5.51	-3.399	0.000677243	0.016294	0.3108	1.524	0.8282	0.8282	TRUE	0.5913	GO:0071249 [Name: cellular response to nitrate]; GO:0042128 [Name: nitrate assimilation]; GO:0015706 [Name: nitrate transport]	GO:0009705 [Name: plant-type vacuole membrane]; GO:0016021 [Name: integral component of membrane]; GO:0005886 [Name: plasma membrane]	GO:0015112 [Name: nitrate transmembrane transporter activity]	ath00910 [Pathway Title: Nitrogen metabolism]
AT3G13710.1	3	4490628	4493831	-	PRA1F4	prenylated RAB acceptor 1.F4	20	0	17	0	0	0	5.31	0.011	-6.48	-2.979	0.00289656	0.0485831	6.0343	1.7299	2.3226	2.3226	TRUE	0.7536	GO:0016192 [Name: vesicle-mediated transport]	GO:0010008 [Name: endosome membrane]; GO:0005794 [Name: Golgi apparatus]; GO:0016021 [Name: integral component of membrane]; GO:0005783 [Name: endoplasmic reticulum]	GO:0003674 [Name: molecular_function]	-
AT5G01620.3	5	232732	234847	+	TBL35	TRICHOME BIREFRINGENCE-LIKE 35	10	6	6	0	0	0	6.66	0.01	-6.645	-3.84	0.000122845	0.00421546	0.6872	1.3807	1.0823	1.0823	TRUE	0.7323	GO:0045492 [Name: xylan biosynthetic process]	GO:0005794 [Name: Golgi apparatus]; GO:0016021 [Name: integral component of membrane]	GO:0016413 [Name: O-acetyltransferase activity]; GO:1990538 [Name: xylan O-acetyltransferase activity]	-
AT5G26910.3	5	9465941	9470337	-	AT5G26910	GPI-anchored adhesin-like protein	20	0	23	0	0	0	6.23	0.01	-6.707	-3.17	0.00152661	0.0301453	6.5026	1.475	2.1515	2.1515	TRUE	0.2005	GO:0000132 [Name: establishment of mitotic spindle orientation]; GO:0000913 [Name: preprophase band assembly]	GO:0005739 [Name: mitochondrion]; GO:0005634 [Name: nucleus]	GO:0003674 [Name: molecular_function]	-
AT4G33260.2	4	16041074	16043457	-	CDC20-2	Transducin family protein / WD-40 repeat family protein	7	6	12	0	0	0	7.19	0.009	-6.769	-4.021	5.79153e-05	0.00230739	0.5733	1.2793	0.9728	0.9728	TRUE	0.183	GO:0016567 [Name: protein ubiquitination]; GO:0031145 [Name: anaphase-promoting complex-dependent catabolic process]; GO:0007049 [Name: cell cycle]; GO:0051301 [Name: cell division]; GO:1905786 [Name: positive regulation of anaphase-promoting complex-dependent catabolic process]	GO:0005634 [Name: nucleus]; GO:0033597 [Name: mitotic checkpoint complex]; GO:0005680 [Name: anaphase-promoting complex]	GO:1990757 [Name: ubiquitin ligase activator activity]; GO:0019900 [Name: kinase binding]; GO:0010997 [Name: anaphase-promoting complex binding]	ath04120 [Pathway Title: Ubiquitin mediated proteolysis]
AT2G14170.2	2	5977451	5981616	-	ALDH6B2	aldehyde dehydrogenase 6B2	9	0	37	0	0	0	6.93	0.009	-6.848	-3.101	0.00192621	0.0360489	8.0707	1.3274	2.4446	2.4446	TRUE	0.3657	-	GO:0005739 [Name: mitochondrion]; GO:0005829 [Name: cytosol]; GO:0009507 [Name: chloroplast]	GO:0004491 [Name: methylmalonate-semialdehyde dehydrogenase (acylating) activity]	ath00562 [Pathway Title: Inositol phosphate metabolism]; ath01200 [Pathway Title: Carbon metabolism]; ath00410 [Pathway Title: beta-Alanine metabolism]; ath00640 [Pathway Title: Propanoate metabolism]; ath00280 [Pathway Title: Valine leucine and isoleucine degradation]; ath01100 [Pathway Title: Metabolic pathways]
AT1G15340.2	1	5275677	5277689	-	MBD10	methyl-CPG-binding domain 10	36	0	14	0	0	0	6.99	0.009	-6.868	-3.25	0.00115381	0.0244557	7.1681	1.3148	2.1508	2.1508	TRUE	0.0578	GO:0006355 [Name: regulation of transcription DNA-templated]; GO:0009314 [Name: response to radiation]; GO:0009892 [Name: negative regulation of metabolic process]; GO:0009966 [Name: regulation of signal transduction]; GO:0048507 [Name: meristem development]; GO:2000026 [Name: regulation of multicellular organismal development]; GO:0048827 [Name: phyllome development]; GO:0018205 [Name: peptidyl-…	GO:0005634 [Name: nucleus]; GO:0005829 [Name: cytosol]	GO:0008327 [Name: methyl-CpG binding]	-
AT4G02890.1	4	1278577	1280028	-	UBQ14	Ubiquitin family protein	11	8	4	0	0	0	7.89	0.008	-6.896	-3.839	0.000123509	0.0042259	1.393	1.1662	1.261	1.261	TRUE	0.5407	[Gene Type: protein-coding]; 825880 [Gene Symbol: UBQ10] [Locus Tag: AT4G05320] [Chromosome: 4] [Map Location: ]	[Description: polyubiquitin 10]	[Gene Type: protein-coding]	ath03010 [Pathway Title: Ribosome]
AT3G16700.1	3	5687721	5689719	+	AT3G16700	Fumarylacetoacetate (FAA) hydrolase family	3	6	19	0	0	0	7.69	0.008	-6.899	-3.826	0.00013014	0.00439359	1.394	1.1959	1.2789	1.2789	TRUE	0.1306	GO:0009751 [Name: response to salicylic acid]; GO:1901566 [Name: organonitrogen compound biosynthetic process]; GO:1901135 [Name: carbohydrate derivative metabolic process]; GO:0070542 [Name: response to fatty acid]; GO:0071407 [Name: cellular response to organic cyclic compound]	GO:0005829 [Name: cytosol]; GO:0005739 [Name: mitochondrion]	GO:0003824 [Name: catalytic activity]; GO:0047621 [Name: acylpyruvate hydrolase activity]; GO:0018773 [Name: acetylpyruvate hydrolase activity]; GO:0005507 [Name: copper ion binding]	-
AT1G54180.1	1	20227291	20230237	+	BRXL3	BREVIS RADIX-like 3	22	9	4	0	0	0	10.16	0.006	-7.292	-4.238	2.25941e-05	0.00107292	1.3495	0.9073	1.0845	1.0845	TRUE	0.0835	GO:0009888 [Name: tissue development]; GO:0033993 [Name: response to lipid]; GO:0006629 [Name: lipid metabolic process]; GO:0032787 [Name: monocarboxylic acid metabolic process]; GO:0048367 [Name: shoot system development]	GO:0005634 [Name: nucleus]	GO:0003674 [Name: molecular_function]	-
AT5G10330.3	5	3247847	3249966	-	HISN6B	histidinol phosphate aminotransferase 1	0	8	26	0	0	0	9.87	0.006	-7.292	-3.177	0.00148995	0.0296301	10	0.9339	2.7464	2.7464	TRUE	0.1609	[Gene Type: protein-coding]	GO:0009507 [Name: chloroplast]; GO:0005737 [Name: cytoplasm]; GO:0009570 [Name: chloroplast stroma]	GO:0030170 [Name: pyridoxal phosphate binding]; GO:0004400 [Name: histidinol-phosphate transaminase activity]	ath00360 [Pathway Title: Phenylalanine metabolism]; ath01130 [Pathway Title: Biosynthesis of antibiotics]; ath00400 [Pathway Title: Phenylalanine tyrosine and tryptophan biosynthesis]; ath00960 [Pathway Title: Tropane piperidine and pyridine alkaloid biosynthesis]; ath01110 [Pathway Title: Biosynthesis of secondary metabolites]; ath00340 [Pathway Title: Histidine metabolism]; ath00350 [Pathway Ti…
AT3G54320.2	3	20114684	20118639	+	WRI1	Integrase-type DNA-binding superfamily protein	30	7	7	0	0	0	10.22	0.006	-7.323	-4.594	4.33842e-06	0.00028171	0.6205	0.902	0.783	0.783	TRUE	0.2382	GO:0006355 [Name: regulation of transcription DNA-templated]; GO:0006629 [Name: lipid metabolic process]; GO:0008610 [Name: lipid biosynthetic process]; GO:0006109 [Name: regulation of carbohydrate metabolic process]; GO:0006110 [Name: regulation of glycolytic process]; GO:0009744 [Name: response to sucrose]; GO:1901959 [Name: positive regulation of cutin biosynthetic process]; GO:0019432 [Name: …	GO:0005634 [Name: nucleus]	GO:0003677 [Name: DNA binding]; GO:0003700 [Name: transcription factor activity sequence-specific DNA binding]	-
AT3G11180.2	3	3504204	3507057	+	AT3G11180	2-oxoglutarate (2OG) and Fe(II)-dependent oxygenase superfamily protein	23	11	0	0	0	0	11.12	0.006	-7.456	-3.288	0.00100871	0.0220154	10	0.8301	2.6594	2.6594	TRUE	0.0894	GO:2000022 [Name: regulation of jasmonic acid mediated signaling pathway]	GO:0005737 [Name: cytoplasm]	GO:0016491 [Name: oxidoreductase activity]; GO:0046872 [Name: metal ion binding]	-
AT1G53480.2	1	19963047	19964188	-	MRD1	mto 1 responding down 1	136	28	124	0	3	0	58.07	0.006	-7.506	-8.236	1.77982e-16	1.16213e-13	0	0.166	0.0762	0.0762	TRUE	1.4214	GO:0008150 [Name: biological_process]	GO:0005739 [Name: mitochondrion]	GO:0003674 [Name: molecular_function]	-
AT4G21150.2	4	11278403	11283798	+	RPN2	ribophorin II (RPN2) family protein	0	8	36	0	0	0	11.43	0.005	-7.514	-3.334	0.000855594	0.0193753	10	0.8074	2.6161	2.6161	TRUE	5.1654	GO:0006487 [Name: protein N-linked glycosylation]	GO:0008250 [Name: oligosaccharyltransferase complex]; GO:0016021 [Name: integral component of membrane]	-	ath00510 [Pathway Title: N-Glycan biosynthesis]; ath04141 [Pathway Title: Protein processing in endoplasmic reticulum]; ath01100 [Pathway Title: Metabolic pathways]
AT1G17745.2	1	6101015	6105241	+	PGDH2	D-3-phosphoglycerate dehydrogenase	18	11	14	0	0	0	12.65	0.005	-7.592	-4.931	8.16922e-07	6.79207e-05	0.5799	0.7305	0.6685	0.6685	TRUE	1.378	GO:0006564 [Name: L-serine biosynthetic process]	GO:0005634 [Name: nucleus]; GO:0009507 [Name: chloroplast]; GO:0009570 [Name: chloroplast stroma]	GO:0004617 [Name: phosphoglycerate dehydrogenase activity]; GO:0051287 [Name: NAD binding]	ath01200 [Pathway Title: Carbon metabolism]; ath01130 [Pathway Title: Biosynthesis of antibiotics]; ath01100 [Pathway Title: Metabolic pathways]; ath01230 [Pathway Title: Biosynthesis of amino acids]; ath00260 [Pathway Title: Glycine serine and threonine metabolism]
AT1G16260.2	1	5559579	5562113	-	WAKL8	Wall-associated kinase family protein	45	3	62	0	0	0	17.81	0.003	-8.217	-5.649	1.61765e-08	2.27691e-06	0.4557	0.5215	0.4989	0.4989	TRUE	0.0574	GO:0007166 [Name: cell surface receptor signaling pathway]	GO:0016021 [Name: integral component of membrane]; GO:0005886 [Name: plasma membrane]	GO:0005524 [Name: ATP binding]; GO:0005509 [Name: calcium ion binding]; GO:0030247 [Name: polysaccharide binding]; GO:0004674 [Name: protein serine/threonine kinase activity]; GO:0004712 [Name: protein serine/threonine/tyrosine kinase activity]	-
AT2G16950.1	2	7353847	7361202	+	TRN1	transportin 1	67	41	27	0	0	0	43.32	0.001	-9.413	-6.428	1.29396e-10	3.04159e-08	1.1415	0.2195	0.5337	0.5337	TRUE	0.477	GO:0051170 [Name: nuclear import]; GO:0006606 [Name: protein import into nucleus]; GO:0035280 [Name: miRNA loading onto RISC involved in gene silencing by miRNA]	GO:0005737 [Name: cytoplasm]; GO:0005634 [Name: nucleus]; GO:0005654 [Name: nucleoplasm]	GO:0061608 [Name: nuclear import signal receptor activity]; GO:0031267 [Name: small GTPase binding]; GO:0008139 [Name: nuclear localization sequence binding]	-
AT1G08930.2	1	2873465	2877270	+	ERD6	Major facilitator superfamily protein	0	79	0	0	0	0	57.88	0	-23.89	-6.113	9.79869e-10	1.85157e-07	10	0.1665	4.3612	10	TRUE	16.3636	GO:0009737 [Name: response to abscisic acid]; GO:0009409 [Name: response to cold]; GO:0009414 [Name: response to water deprivation]; GO:0009651 [Name: response to salt stress]	GO:0005783 [Name: endoplasmic reticulum]; GO:0016021 [Name: integral component of membrane]	GO:0051119 [Name: sugar transmembrane transporter activity]	-

## Sheet: 35S AXE XYL RNAseq_Upregulated
Gene_ID	log2FoldChange	pvalue	padj	Gene.Name	GOTERM_BP_DIRECT	GOTERM_CC_DIRECT	GOTERM_MF_DIRECT	INTERPRO	KEGG_PATHWAY
AT1G64795	6.37912	6.93894e-24	2.09913e-20
AT4G29020	4.78272	1.55394e-11	2.83674e-09	glycine-rich protein(AT4G29020)		GO:0005575~cellular_component	GO:0003674~molecular_function
AT5G33370	4.6222	8.43023e-34	8.92593e-30	GDSL-like Lipase/Acylhydrolase superfamily protein(AT5G33370)	GO:0016042~lipid catabolic process,GO:0042335~cuticle development,GO:0160062~cutin-based cuticle development	GO:0005576~extracellular region	GO:0016788~hydrolase activity, acting on ester bonds	IPR001087:GDSL,IPR035669:SGNH_plant_lipase-like,IPR036514:SGNH_hydro_sf,IPR051058:GDSL_Est/Lipase
AT1G73550	3.97952	6.9526e-07	2.09131e-05	Bifunctional inhibitor/lipid-transfer protein/seed storage 2S albumin superfamily protein(AT1G73550)		GO:0005575~cellular_component,GO:0005886~plasma membrane,GO:0098552~side of membrane	GO:0003674~molecular_function	IPR016140:Bifunc_inhib/LTP/seed_store,IPR036312:Bifun_inhib/LTP/seed_sf,IPR043325:LTSS
AT3G48520	3.72455	1.16484e-10	1.54166e-08	cytochrome P450, family 94, subfamily B, polypeptide 3(CYP94B3)	GO:0002213~defense response to insect,GO:0009555~pollen development,GO:0009611~response to wounding,GO:0009694~jasmonic acid metabolic process,GO:0010154~fruit development,GO:0048480~stigma development,GO:0048653~anther development	GO:0005576~extracellular region,GO:0005789~endoplasmic reticulum membrane	GO:0004497~monooxygenase activity,GO:0005506~iron ion binding,GO:0016705~oxidoreductase activity, acting on paired donors, with incorporation or reduction of molecular oxygen,GO:0020037~heme binding,GO:0052694~jasmonoyl-isoleucine-12-hydroxylase activity	IPR001128:Cyt_P450,IPR002401:Cyt_P450_E_grp-I,IPR036396:Cyt_P450_sf
AT2G06995	3.24799	1.1452e-10	1.52521e-08
AT2G20880	3.24718	5.11414e-18	4.33188e-15	Integrase-type DNA-binding superfamily protein(ERF53)	GO:0009651~response to salt stress,GO:0009873~ethylene-activated signaling pathway,GO:0045893~positive regulation of DNA-templated transcription,GO:1900036~positive regulation of cellular response to heat,GO:2000070~regulation of response to water deprivation	GO:0005634~nucleus,GO:0005737~cytoplasm	GO:0000976~transcription cis-regulatory region binding,GO:0003700~DNA-binding transcription factor activity,GO:0005515~protein binding,GO:0043565~sequence-specific DNA binding	IPR001471:AP2/ERF_dom,IPR016177:DNA-bd_dom_sf,IPR036955:AP2/ERF_dom_sf,IPR051758:ERF/AP2-like
AT5G52050	3.1957	2.5253e-11	4.11352e-09	MATE efflux family protein(AT5G52050)	GO:0009737~response to abscisic acid,GO:0010015~root morphogenesis,GO:0080168~abscisic acid transport,GO:1990961~xenobiotic detoxification by transmembrane export across the plasma membrane,GO:2000070~regulation of response to water deprivation	GO:0005770~late endosome,GO:0005886~plasma membrane,GO:0009507~chloroplast,GO:0016020~membrane,GO:0031902~late endosome membrane	GO:0015297~antiporter activity,GO:0042910~xenobiotic transmembrane transporter activity,GO:0090440~abscisic acid transmembrane transporter activity	IPR002528:MATE_fam,IPR045069:MATE_euk
AT1G49500	3.15838	2.4222e-09	1.88576e-07	transcription initiation factor TFIID subunit 1b-like protein(AT1G49500)		GO:0005575~cellular_component	GO:0003674~molecular_function
AT5G45630	3.14978	1.05039e-06	2.94611e-05	senescence regulator (Protein of unknown function, DUF584)(AT5G45630)	GO:0009617~response to bacterium,GO:0009646~response to absence of light,GO:0009737~response to abscisic acid,GO:0009751~response to salicylic acid,GO:0010150~leaf senescence,GO:0071456~cellular response to hypoxia	GO:0005634~nucleus,GO:0005737~cytoplasm	GO:0003674~molecular_function	IPR007608:Senescence_reg_S40
AT2G38540	2.95065	1.00313e-09	9.20997e-08	lipid transfer protein 1(LP1)	GO:0006869~lipid transport,GO:0071555~cell wall organization	GO:0005576~extracellular region,GO:0005794~Golgi apparatus,GO:0005886~plasma membrane,GO:0009505~plant-type cell wall,GO:0009534~chloroplast thylakoid,GO:0048046~apoplast,GO:0099503~secretory vesicle	GO:0005516~calmodulin binding,GO:0008289~lipid binding	IPR000528:Plant_nsLTP,IPR016140:Bifunc_inhib/LTP/seed_store,IPR036312:Bifun_inhib/LTP/seed_sf
AT1G72110	2.94879	2.33285e-09	1.83645e-07	O-acyltransferase (WSD1-like) family protein(AT1G72110)	GO:0019432~triglyceride biosynthetic process	GO:0005789~endoplasmic reticulum membrane,GO:0005886~plasma membrane	GO:0004144~diacylglycerol O-acyltransferase activity,GO:0047196~long-chain-alcohol O-fatty-acyltransferase activity	IPR004255:O-acyltransferase_WSD1_N,IPR009721:O-acyltransferase_WSD1_C,IPR023213:CAT-like_dom_sf,IPR045034:O-acyltransferase_WSD1-like
AT1G35140	2.83795	8.18818e-07	2.38505e-05	Phosphate-responsive 1 family protein(PHI-1)	GO:0001666~response to hypoxia,GO:0016042~lipid catabolic process,GO:0071456~cellular response to hypoxia	GO:0005576~extracellular region,GO:0005794~Golgi apparatus,GO:0009505~plant-type cell wall,GO:0048046~apoplast	GO:0003674~molecular_function,GO:0016298~lipase activity	IPR001087:GDSL,IPR006766:EXORDIUM-like,IPR008265:Lipase_GDSL_AS,IPR035669:SGNH_plant_lipase-like,IPR036514:SGNH_hydro_sf,IPR050592:GDSL_lipolytic_enzyme
AT5G52020	2.82248	7.25545e-10	7.04777e-08	Integrase-type DNA-binding superfamily protein(AT5G52020)	GO:0006355~regulation of DNA-templated transcription,GO:0009873~ethylene-activated signaling pathway,GO:0019760~glucosinolate metabolic process,GO:0050832~defense response to fungus	GO:0005634~nucleus	GO:0000976~transcription cis-regulatory region binding,GO:0003677~DNA binding,GO:0003700~DNA-binding transcription factor activity	IPR001471:AP2/ERF_dom,IPR016177:DNA-bd_dom_sf,IPR036955:AP2/ERF_dom_sf,IPR045277:DRE1A-I
AT5G45670	2.76475	4.21213e-13	1.12906e-10	GDSL-like Lipase/Acylhydrolase superfamily protein(AT5G45670)	GO:0016042~lipid catabolic process	GO:0005576~extracellular region	GO:0016788~hydrolase activity, acting on ester bonds	IPR001087:GDSL,IPR035669:SGNH_plant_lipase-like,IPR036514:SGNH_hydro_sf,IPR051238:GDSL_esterase/lipase
AT5G15160	2.69422	3.43514e-11	5.40168e-09	BANQUO 2(BNQ2)	GO:0006355~regulation of DNA-templated transcription,GO:0009640~photomorphogenesis,GO:0009740~gibberellic acid mediated signaling pathway,GO:0040008~regulation of growth,GO:0048510~regulation of timing of transition from vegetative to reproductive phase	GO:0000325~plant-type vacuole,GO:0005634~nucleus	GO:0003700~DNA-binding transcription factor activity,GO:0005515~protein binding,GO:0046983~protein dimerization activity	IPR011598:bHLH_dom,IPR036638:HLH_DNA-bd_sf,IPR044293:PRE
AT5G20230	2.58898	2.42107e-27	1.02537e-23	blue-copper-binding protein(BCB)	GO:0002239~response to oomycetes,GO:0006979~response to oxidative stress,GO:0009611~response to wounding,GO:0009646~response to absence of light,GO:0015690~aluminum cation transport,GO:0070417~cellular response to cold,GO:0071456~cellular response to hypoxia,GO:1901141~regulation of lignin biosynthetic process	GO:0000325~plant-type vacuole,GO:0005576~extracellular region,GO:0005886~plasma membrane,GO:0009536~plastid,GO:0016020~membrane,GO:0098552~side of membrane	GO:0005515~protein binding,GO:0009055~electron transfer activity,GO:0046872~metal ion binding	IPR003245:Phytocyanin_dom,IPR008972:Cupredoxin,IPR028871:BlueCu_1_BS,IPR039391:Phytocyanin-like
AT1G09950	2.46839	3.10471e-11	4.94326e-09	RESPONSE TO ABA AND SALT 1(RAS1)	GO:0006351~DNA-templated transcription,GO:0009651~response to salt stress,GO:0009737~response to abscisic acid,GO:0009738~abscisic acid-activated signaling pathway,GO:0009788~negative regulation of abscisic acid-activated signaling pathway,GO:1900070~negative regulation of cellular hyperosmotic salinity response	GO:0005634~nucleus	GO:0043565~sequence-specific DNA binding	IPR025422:TGA_domain,IPR051886:Seed_Dev/Stress_Resp_Reg
AT5G23940	2.46401	9.75715e-12	1.90012e-09	HXXXD-type acyl-transferase family protein(PEL3)	GO:0009793~embryo development ending in seed dormancy,GO:0010090~trichome morphogenesis,GO:0010143~cutin biosynthetic process,GO:0051179~localization,GO:0090626~plant epidermis morphogenesis	GO:0005737~cytoplasm,GO:0005829~cytosol	GO:0016746~acyltransferase activity	IPR023213:CAT-like_dom_sf,IPR051283:Sec_Metabolite_Acyltrans
AT2G42840	2.44951	1.44324e-13	4.56149e-11	protodermal factor 1(PDF1)		GO:0005576~extracellular region,GO:0005634~nucleus	GO:0003674~molecular_function	IPR039923:Protodermal_1
AT1G74430	2.41285	2.21508e-09	1.7634e-07	myb domain protein 95(MYB95)		GO:0005634~nucleus	GO:0003700~DNA-binding transcription factor activity	IPR001005:SANT/Myb,IPR009057:Homeodomain-like_sf,IPR015495:Myb_TF_plants,IPR017930:Myb_dom
AT1G24020	2.38829	2.3824e-10	2.78727e-08	MLP-like protein 423(MLP423)	GO:0006952~defense response,GO:0009738~abscisic acid-activated signaling pathway	GO:0005634~nucleus,GO:0005829~cytosol,GO:0009507~chloroplast,GO:0010494~cytoplasmic stress granule	GO:0004864~protein phosphatase inhibitor activity,GO:0010427~abscisic acid binding,GO:0038023~signaling receptor activity	IPR000916:Bet_v_I/MLP,IPR023393:START-like_dom_sf,IPR024949:Bet_v_I_allergen,IPR051761:MLP-like_ligand-binding
AT1G62500	2.38271	2.44332e-06	5.7714e-05	Bifunctional inhibitor/lipid-transfer protein/seed storage 2S albumin superfamily protein(AT1G62500)		GO:0005575~cellular_component	GO:0003674~molecular_function	IPR027923:Hydrophob_seed_dom,IPR036312:Bifun_inhib/LTP/seed_sf,IPR051636:Plant_LTP/defense-related
AT1G02065	2.37324	1.17028e-08	7.31028e-07	squamosa promoter binding protein-like 8(SPL8)	GO:0009554~megasporogenesis,GO:0009556~microsporogenesis,GO:0030154~cell differentiation,GO:0048653~anther development	GO:0005634~nucleus,GO:0005737~cytoplasm	GO:0003677~DNA binding,GO:0046872~metal ion binding	IPR004333:SBP_dom,IPR036893:SBP_sf,IPR044817:SBP-like
AT4G02330	2.37311	3.13826e-08	1.62087e-06	Plant invertase/pectin methylesterase inhibitor superfamily(ATPMEPCRB)	GO:0009409~response to cold,GO:0009620~response to fungus,GO:0009741~response to brassinosteroid,GO:0042545~cell wall modification,GO:0045490~pectin catabolic process,GO:0050832~defense response to fungus	GO:0005576~extracellular region	GO:0004857~enzyme inhibitor activity,GO:0030599~pectinesterase activity	IPR000070:Pectinesterase_cat,IPR006501:Pectinesterase_inhib_dom,IPR011050:Pectin_lyase_fold/virulence,IPR012334:Pectin_lyas_fold,IPR033131:Pectinesterase_Asp_AS,IPR035513:Invertase/methylesterase_inhib	ath00040:Pentose and glucuronate interconversions,ath01100:Metabolic pathways
AT2G36450	2.36699	2.06403e-06	5.0936e-05	Integrase-type DNA-binding superfamily protein(HRD)	GO:0006355~regulation of DNA-templated transcription,GO:0009873~ethylene-activated signaling pathway,GO:0050832~defense response to fungus	GO:0005634~nucleus	GO:0003677~DNA binding,GO:0003700~DNA-binding transcription factor activity	IPR001471:AP2/ERF_dom,IPR016177:DNA-bd_dom_sf,IPR036955:AP2/ERF_dom_sf,IPR045277:DRE1A-I
AT5G37970	2.35586	2.59057e-08	1.38891e-06	S-adenosyl-L-methionine-dependent methyltransferase superfamily protein(AT5G37970)	GO:0032259~methylation	GO:0009507~chloroplast	GO:0008168~methyltransferase activity,GO:0008757~S-adenosylmethionine-dependent methyltransferase activity,GO:0046872~metal ion binding	IPR005299:MeTrfase_7,IPR029063:SAM-dependent_MTases_sf,IPR042086:MeTrfase_capping
AT1G14540	2.35226	1.15185e-07	4.77718e-06	Peroxidase superfamily protein(PER4)	GO:0006979~response to oxidative stress,GO:0042744~hydrogen peroxide catabolic process,GO:0071456~cellular response to hypoxia	GO:0005576~extracellular region,GO:0005773~vacuole	GO:0004601~peroxidase activity,GO:0020037~heme binding,GO:0046872~metal ion binding,GO:0140825~lactoperoxidase activity	IPR000823:Peroxidase_pln,IPR002016:Haem_peroxidase,IPR010255:Haem_peroxidase_sf,IPR019793:Peroxidases_heam-ligand_BS,IPR019794:Peroxidases_AS,IPR033905:Secretory_peroxidase	ath00940:Phenylpropanoid biosynthesis,ath01100:Metabolic pathways,ath01110:Biosynthesis of secondary metabolites
AT4G28140	2.31516	3.86964e-37	8.19435e-33	Integrase-type DNA-binding superfamily protein(AT4G28140)	GO:0006355~regulation of DNA-templated transcription,GO:0009408~response to heat,GO:0009873~ethylene-activated signaling pathway	GO:0005634~nucleus	GO:0000976~transcription cis-regulatory region binding,GO:0003700~DNA-binding transcription factor activity	IPR001471:AP2/ERF_dom,IPR016177:DNA-bd_dom_sf,IPR036955:AP2/ERF_dom_sf,IPR051758:ERF/AP2-like
AT5G19110	2.25182	8.74768e-06	0.000157786	Eukaryotic aspartyl protease family protein(AT5G19110)	GO:0006508~proteolysis	GO:0005576~extracellular region	GO:0004190~aspartic-type endopeptidase activity	IPR001461:Aspartic_peptidase_A1,IPR021109:Peptidase_aspartic_dom_sf,IPR032799:TAXi_C,IPR032861:TAXi_N,IPR033121:PEPTIDASE_A1,IPR033868:Xylanase_inhibitor_I-like
AT1G63030	2.24192	1.17022e-05	0.000196515	Integrase-type DNA-binding superfamily protein(ddf2)	GO:0006355~regulation of DNA-templated transcription,GO:0010371~regulation of gibberellin biosynthetic process,GO:0048510~regulation of timing of transition from vegetative to reproductive phase	GO:0005634~nucleus	GO:0003677~DNA binding,GO:0003700~DNA-binding transcription factor activity	IPR001471:AP2/ERF_dom,IPR016177:DNA-bd_dom_sf,IPR036955:AP2/ERF_dom_sf,IPR045277:DRE1A-I
AT2G23120	2.2353	5.40744e-20	8.17914e-17	Late embryogenesis abundant protein, group 6(AT2G23120)		GO:0005773~vacuole,GO:0005829~cytosol	GO:0003674~molecular_function	IPR018930:LEA-18
AT5G47500	2.22912	1.92807e-09	1.58251e-07	Pectin lyase-like superfamily protein(PME5)	GO:0042545~cell wall modification,GO:0045490~pectin catabolic process	GO:0005576~extracellular region	GO:0030599~pectinesterase activity	IPR000070:Pectinesterase_cat,IPR011050:Pectin_lyase_fold/virulence,IPR012334:Pectin_lyas_fold,IPR033131:Pectinesterase_Asp_AS
AT1G65390	2.21731	1.24493e-10	1.60748e-08	phloem protein 2 A5(PP2-A5)	GO:0002213~defense response to insect,GO:0007165~signal transduction,GO:0009863~salicylic acid mediated signaling pathway,GO:0009867~jasmonic acid mediated signaling pathway,GO:0032260~response to jasmonic acid stimulus involved in jasmonic acid and ethylene-dependent systemic resistance,GO:2000012~regulation of auxin polar transport	GO:0005634~nucleus,GO:0005737~cytoplasm,GO:0005777~peroxisome,GO:0005829~cytosol,GO:0009507~chloroplast,GO:0012505~endomembrane system	GO:0003953~NAD+ nucleosidase activity,GO:0004722~protein serine/threonine phosphatase activity,GO:0017018~myosin phosphatase activity,GO:0030246~carbohydrate binding,GO:0033192~calmodulin-dependent protein phosphatase activity,GO:0046872~metal ion binding,GO:0061809~NAD+ nucleosidase activity, cyclic ADP-ribose generating,GO:0140791~histone H2AXS140 phosphatase activity,GO:0180004~RNA polymerase …	IPR000157:TIR_dom,IPR004843:Calcineurin-like_PHP_ApaH,IPR006186:Ser/Thr-sp_prot-phosphatase,IPR025886:PP2-like,IPR029052:Metallo-depent_PP-like,IPR035897:Toll_tir_struct_dom_sf,IPR047129:PPA2-like,IPR052147:PP2-like/Lectin
AT1G01600	2.18544	3.41205e-12	7.60563e-10	cytochrome P450, family 86, subfamily A, polypeptide 4(CYP86A4)	GO:0006629~lipid metabolic process,GO:0006631~fatty acid metabolic process	GO:0005739~mitochondrion,GO:0016020~membrane	GO:0004497~monooxygenase activity,GO:0005506~iron ion binding,GO:0016705~oxidoreductase activity, acting on paired donors, with incorporation or reduction of molecular oxygen,GO:0016712~oxidoreductase activity, acting on paired donors, with incorporation or reduction of molecular oxygen, reduced flavin or flavoprotein as one donor, and incorporation of one atom of oxygen,GO:0018685~alkane 1-monoo…	IPR001128:Cyt_P450,IPR002401:Cyt_P450_E_grp-I,IPR017972:Cyt_P450_CS,IPR036396:Cyt_P450_sf	ath00073:Cutin, suberine and wax biosynthesis,ath01100:Metabolic pathways
AT5G41080	2.18426	5.86133e-09	4.08947e-07	PLC-like phosphodiesterases superfamily protein(GDPD2)	GO:0006071~glycerol metabolic process,GO:0006629~lipid metabolic process,GO:0071456~cellular response to hypoxia	GO:0005737~cytoplasm,GO:0009507~chloroplast	GO:0008889~glycerophosphodiester phosphodiesterase activity	IPR017946:PLC-like_Pdiesterase_TIM-brl,IPR030395:GP_PDE_dom,IPR051578:GDPD	ath00564:Glycerophospholipid metabolism
AT2G22760	2.17616	1.20417e-05	0.000201161	basic helix-loop-helix (bHLH) DNA-binding superfamily protein(AT2G22760)	GO:0006355~regulation of DNA-templated transcription	GO:0005634~nucleus	GO:0000976~transcription cis-regulatory region binding,GO:0003677~DNA binding,GO:0003700~DNA-binding transcription factor activity,GO:0005515~protein binding,GO:0046983~protein dimerization activity	IPR011598:bHLH_dom,IPR036638:HLH_DNA-bd_sf,IPR052610:bHLH_transcription_regulator
AT2G42870	2.16699	2.33688e-06	5.61859e-05	phy rapidly regulated 1(PAR1)	GO:0006355~regulation of DNA-templated transcription,GO:0009641~shade avoidance,GO:0009742~brassinosteroid mediated signaling pathway,GO:0032502~developmental process,GO:0045892~negative regulation of DNA-templated transcription	GO:0005634~nucleus,GO:0009507~chloroplast	GO:0003712~transcription coregulator activity,GO:0042803~protein homodimerization activity	IPR044549:bHLH_AtIBH1-like,IPR044660:IBH1-like
AT2G32210	2.157	1.48503e-06	3.88714e-05	cysteine-rich/transmembrane domain A-like protein(AT2G32210)	GO:0071456~cellular response to hypoxia	GO:0005737~cytoplasm,GO:0005886~plasma membrane	GO:0005515~protein binding,GO:0042802~identical protein binding,GO:0042803~protein homodimerization activity	IPR028144:CYSTM_dom,IPR044850:WIH1-like
AT5G44620	2.15584	2.95939e-07	1.01899e-05	cytochrome P450, family 706, subfamily A, polypeptide 3(CYP706A3)	GO:0043692~monoterpene metabolic process,GO:0051761~sesquiterpene metabolic process	GO:0005791~rough endoplasmic reticulum,GO:0016020~membrane	GO:0004497~monooxygenase activity,GO:0005506~iron ion binding,GO:0016705~oxidoreductase activity, acting on paired donors, with incorporation or reduction of molecular oxygen,GO:0020037~heme binding,GO:0102878~(+)-alpha-barbatene synthase activity,GO:0102879~(+)-thujopsene synthase activity	IPR001128:Cyt_P450,IPR002401:Cyt_P450_E_grp-I,IPR017972:Cyt_P450_CS,IPR036396:Cyt_P450_sf
AT2G14900	2.15578	3.37395e-12	7.60071e-10	Gibberellin-regulated family protein(AT2G14900)	GO:0009740~gibberellic acid mediated signaling pathway	GO:0005576~extracellular region	GO:0003674~molecular_function	IPR003854:GASA
AT1G80820	2.15405	1.75701e-12	4.2766e-10	cinnamoyl coa reductase(CCR2)	GO:0006952~defense response,GO:0007623~circadian rhythm,GO:0009409~response to cold,GO:0009699~phenylpropanoid biosynthetic process,GO:0009809~lignin biosynthetic process,GO:0042754~negative regulation of circadian rhythm	GO:0005575~cellular_component,GO:0016020~membrane	GO:0003723~RNA binding,GO:0004672~protein kinase activity,GO:0004676~3-phosphoinositide-dependent protein kinase activity,GO:0004677~DNA-dependent protein kinase activity,GO:0004679~AMP-activated protein kinase activity,GO:0004694~eukaryotic translation initiation factor 2alpha kinase activity,GO:0004711~ribosomal protein S6 kinase activity,GO:0005524~ATP binding,GO:0016491~oxidoreductase activit…	IPR000504:RRM_dom,IPR000719:Prot_kinase_dom,IPR001245:Ser-Thr/Tyr_kinase_cat_dom,IPR001509:Epimerase_deHydtase,IPR008271:Ser/Thr_kinase_AS,IPR009091:RCC1/BLIP-II,IPR011009:Kinase-like_dom_sf,IPR012677:Nucleotide-bd_a/b_plait_sf,IPR017441:Protein_kinase_ATP_BS,IPR035979:RBD_domain_sf,IPR036291:NAD(P)-bd_dom_sf,IPR048289:RRM2_NsCP33-like,IPR050425:NAD(P)_dehydrat-like,IPR052462:SLIRP/GR-RBP-like	ath00940:Phenylpropanoid biosynthesis,ath01100:Metabolic pathways,ath01110:Biosynthesis of secondary metabolites
AT5G22430	2.14715	2.08496e-06	5.1279e-05	Pollen Ole e 1 allergen and extensin family protein(AT5G22430)		GO:0016020~membrane	GO:0003674~molecular_function
AT2G27385	2.14558	6.10094e-14	2.08377e-11	Pollen Ole e 1 allergen and extensin family protein(AT2G27385)	GO:0008150~biological_process	GO:0009507~chloroplast	GO:0003674~molecular_function
AT2G01010	2.13231	6.48298e-20	9.15224e-17	18S ribosomal RNA(AT2G01010)	GO:0006412~translation	GO:0022627~cytosolic small ribosomal subunit	GO:0003674~molecular_function		ath03008:Ribosome biogenesis in eukaryotes,ath03010:Ribosome
AT1G70390	2.12876	1.20549e-05	0.000201161	F-box and associated interaction domains-containing protein(AT1G70390)	GO:0008150~biological_process	GO:0005634~nucleus	GO:0003674~molecular_function	IPR001810:F-box_dom,IPR013187:F-box-assoc_dom_typ3,IPR017451:F-box-assoc_interact_dom,IPR036047:F-box-like_dom_sf
AT3G06890	2.12426	8.51345e-08	3.74484e-06	uncharacterized protein(AT3G06890)		GO:0005575~cellular_component,GO:0016020~membrane	GO:0003674~molecular_function
AT1G16370	2.11926	1.03624e-09	9.37755e-08	organic cation/carnitine transporter 6(OCT6)	GO:0006811~monoatomic ion transport,GO:0042631~cellular response to water deprivation,GO:0055085~transmembrane transport,GO:0071472~cellular response to salt stress	GO:0005886~plasma membrane,GO:0009705~plant-type vacuole membrane,GO:0016020~membrane	GO:0005524~ATP binding,GO:0015144~carbohydrate transmembrane transporter activity,GO:0022857~transmembrane transporter activity	IPR005828:MFS_sugar_transport-like,IPR020846:MFS_dom,IPR036259:MFS_trans_sf
AT4G30280	2.11914	9.48053e-10	8.80525e-08	xyloglucan endotransglucosylase/hydrolase 18(XTH18)	GO:0010411~xyloglucan metabolic process,GO:0042546~cell wall biogenesis,GO:0071456~cellular response to hypoxia,GO:0071555~cell wall organization	GO:0005576~extracellular region,GO:0005794~Golgi apparatus,GO:0048046~apoplast	GO:0004553~hydrolase activity, hydrolyzing O-glycosyl compounds,GO:0016762~xyloglucan:xyloglucosyl transferase activity,GO:0030247~polysaccharide binding	IPR000757:GH16,IPR008263:GH16_AS,IPR008264:Beta_glucanase,IPR010713:XET_C,IPR013320:ConA-like_dom_sf,IPR016455:XTH,IPR044791:Beta-glucanase/XTH
AT1G32910	2.11786	5.63228e-06	0.000110639	HXXXD-type acyl-transferase family protein(AT1G32910)		GO:0005737~cytoplasm		IPR023213:CAT-like_dom_sf,IPR050317:Plant_Fungal_Acyltransferase
AT5G13220	2.10865	5.96289e-11	8.64864e-09	jasmonate-zim-domain protein 10(JAZ10)	GO:0006952~defense response,GO:0009611~response to wounding,GO:0009753~response to jasmonic acid,GO:0010112~regulation of systemic acquired resistance,GO:0031347~regulation of defense response,GO:2000022~regulation of jasmonic acid mediated signaling pathway	GO:0005634~nucleus	GO:0005515~protein binding,GO:0042803~protein homodimerization activity	IPR010399:Tify_dom,IPR018467:CCT_CS,IPR040390:TIFY/JAZ	ath04075:Plant hormone signal transduction
AT1G61340	2.094	1.36264e-09	1.17298e-07	F-box family protein(FBS1)	GO:0006970~response to osmotic stress,GO:0009611~response to wounding,GO:0009617~response to bacterium,GO:0009651~response to salt stress,GO:0009737~response to abscisic acid,GO:0009751~response to salicylic acid,GO:0009753~response to jasmonic acid,GO:0009961~response to 1-aminocyclopropane-1-carboxylic acid,GO:0071456~cellular response to hypoxia	GO:0005739~mitochondrion	GO:0005515~protein binding	IPR001810:F-box_dom,IPR045286:FBS1-like
AT3G01550	2.0904	2.66144e-10	3.06297e-08	phosphoenolpyruvate (pep)/phosphate translocator 2(PPT2)	GO:0015713~phosphoglycerate transmembrane transport,GO:0015714~phosphoenolpyruvate transport	GO:0005886~plasma membrane,GO:0009507~chloroplast,GO:0031969~chloroplast membrane	GO:0015120~phosphoglycerate transmembrane transporter activity,GO:0015121~phosphoenolpyruvate:phosphate antiporter activity,GO:0015297~antiporter activity,GO:0015605~organophosphate ester transmembrane transporter activity	IPR004696:Tpt_PEP_transl,IPR004853:Sugar_P_trans_dom,IPR050186:TPT_transporter
AT5G40460	2.06759	3.64958e-08	1.85291e-06	cyclin-dependent kinase inhibitor SMR3-like protein(AT5G40460)	GO:0032875~regulation of DNA endoreduplication	GO:0005575~cellular_component	GO:0004860~protein kinase inhibitor activity,GO:0005515~protein binding	IPR040389:SMR
AT4G20940	2.06637	2.21114e-11	3.65806e-09	Leucine-rich receptor-like protein kinase family protein(GHR1)	GO:0006468~protein phosphorylation,GO:0007165~signal transduction,GO:0009416~response to light stimulus,GO:0009737~response to abscisic acid,GO:0009738~abscisic acid-activated signaling pathway,GO:0009789~positive regulation of abscisic acid-activated signaling pathway,GO:0071244~cellular response to carbon dioxide,GO:0071485~cellular response to absence of light,GO:0090333~regulation of stomatal…	GO:0005886~plasma membrane,GO:0016020~membrane	GO:0004672~protein kinase activity,GO:0004674~protein serine/threonine kinase activity,GO:0004676~3-phosphoinositide-dependent protein kinase activity,GO:0004677~DNA-dependent protein kinase activity,GO:0004679~AMP-activated protein kinase activity,GO:0004694~eukaryotic translation initiation factor 2alpha kinase activity,GO:0004711~ribosomal protein S6 kinase activity,GO:0005515~protein binding,…	IPR000719:Prot_kinase_dom,IPR001245:Ser-Thr/Tyr_kinase_cat_dom,IPR001611:Leu-rich_rpt,IPR003591:Leu-rich_rpt_typical-subtyp,IPR011009:Kinase-like_dom_sf,IPR013210:LRR_N_plant-typ,IPR032675:LRR_dom_sf,IPR053059:Inactive_SerThr-Kinase_ABA
AT4G15210	2.06522	3.63107e-14	1.26052e-11	beta-amylase 5(BAM5)	GO:0000272~polysaccharide catabolic process,GO:0005983~starch catabolic process,GO:0080027~response to herbivore	GO:0005576~extracellular region,GO:0099503~secretory vesicle	GO:0016161~beta-amylase activity	IPR001371:Glyco_hydro_14B_pln,IPR001554:Glyco_hydro_14,IPR017853:Glycoside_hydrolase_SF,IPR018238:Glyco_hydro_14_CS	ath00500:Starch and sucrose metabolism,ath01100:Metabolic pathways,ath01110:Biosynthesis of secondary metabolites
AT2G32990	2.05793	1.64883e-12	4.05997e-10	glycosyl hydrolase 9B8(GH9B8)	GO:0030245~cellulose catabolic process,GO:0071555~cell wall organization	GO:0005576~extracellular region	GO:0008810~cellulase activity	IPR001701:Glyco_hydro_9,IPR008928:6-hairpin_glycosidase_sf,IPR012341:6hp_glycosidase-like_sf,IPR018221:Glyco_hydro_9_His_AS
AT1G06350	2.05705	1.28466e-07	5.18172e-06	Fatty acid desaturase family protein(ADS4)	GO:0006636~unsaturated fatty acid biosynthetic process,GO:0010025~wax biosynthetic process,GO:0010114~response to red light	GO:0005739~mitochondrion,GO:0005789~endoplasmic reticulum membrane,GO:0016020~membrane	GO:0016717~oxidoreductase activity, acting on paired donors, with oxidation of a pair of donors resulting in the reduction of molecular oxygen to two molecules of water	IPR005804:FA_desaturase_dom,IPR015876:Acyl-CoA_DS
AT2G30432	2.05208	5.37544e-10	5.53855e-08	Homeodomain-like superfamily protein(TCL1)	GO:0006355~regulation of DNA-templated transcription,GO:0010154~fruit development,GO:2000039~regulation of trichome morphogenesis	GO:0005634~nucleus	GO:0003677~DNA binding	IPR001005:SANT/Myb,IPR009057:Homeodomain-like_sf,IPR015495:Myb_TF_plants
AT5G48850	2.04522	8.53966e-08	3.74484e-06	Tetratricopeptide repeat (TPR)-like superfamily protein(ATSDI1)	GO:0006792~regulation of sulfur utilization,GO:0010438~cellular response to sulfur starvation,GO:0010439~regulation of glucosinolate biosynthetic process	GO:0005634~nucleus,GO:0017053~transcription repressor complex	GO:0005515~protein binding	IPR011990:TPR-like_helical_dom_sf,IPR019734:TPR_rpt,IPR044961:MS5/SDI1
AT5G20740	2.04125	7.51605e-14	2.48687e-11	Plant invertase/pectin methylesterase inhibitor superfamily protein(AT5G20740)	GO:1902183~regulation of shoot apical meristem development	GO:0009507~chloroplast,GO:0048046~apoplast	GO:0004857~enzyme inhibitor activity,GO:0046910~pectinesterase inhibitor activity	IPR006501:Pectinesterase_inhib_dom,IPR035513:Invertase/methylesterase_inhib,IPR051955:PME_Inhibitor
AT1G09932	2.03822	5.21464e-10	5.41301e-08	Phosphoglycerate mutase family protein(AT1G09932)		GO:0005634~nucleus,GO:0005739~mitochondrion		IPR013078:His_Pase_superF_clade-1,IPR029033:His_PPase_superfam,IPR050275:PGM_Phosphatase
AT5G10340	2.02888	3.17723e-12	7.23453e-10	F-box family protein(AT5G10340)		GO:0005634~nucleus	GO:0003674~molecular_function	IPR001810:F-box_dom,IPR006527:F-box-assoc_dom_typ1,IPR011043:Gal_Oxase/kelch_b-propeller,IPR017451:F-box-assoc_interact_dom,IPR036047:F-box-like_dom_sf,IPR050796:SCF_F-box_component
AT1G66160	2.01327	7.40444e-06	0.000138513	CYS, MET, PRO, and GLY protein 1(CMPG1)	GO:0016567~protein ubiquitination	GO:0005575~cellular_component	GO:0005515~protein binding,GO:0061630~ubiquitin protein ligase activity	IPR003613:Ubox_domain,IPR011989:ARM-like,IPR013083:Znf_RING/FYVE/PHD,IPR016024:ARM-type_fold,IPR045185:PUB22/23/24-like,IPR045210:RING-Ubox_PUB
AT3G08030	2.00982	3.28073e-07	1.11335e-05	DNA-directed RNA polymerase subunit beta (Protein of unknown function, DUF642)(AT3G08030)		GO:0005576~extracellular region,GO:0005643~nuclear pore,GO:0005886~plasma membrane,GO:0009505~plant-type cell wall,GO:0009507~chloroplast,GO:0099503~secretory vesicle	GO:0003674~molecular_function	IPR006946:DGR2-like_dom,IPR052437:Pectin_Meth_Modulator
AT1G78850	2.00652	1.10909e-06	3.07571e-05	D-mannose binding lectin protein with Apple-like carbohydrate-binding domain-containing protein(AT1G78850)	GO:0071456~cellular response to hypoxia,GO:1904383~response to sodium phosphate	GO:0000325~plant-type vacuole,GO:0005576~extracellular region,GO:0005739~mitochondrion,GO:0005794~Golgi apparatus,GO:0009505~plant-type cell wall,GO:0048046~apoplast,GO:0099503~secretory vesicle	GO:0005539~glycosaminoglycan binding,GO:0030246~carbohydrate binding	IPR001480:Bulb-type_lectin_dom,IPR003609:Pan_app,IPR035446:SLSG/EP1,IPR036426:Bulb-type_lectin_dom_sf,IPR051343:G-type_lectin_kinases/EP1-like
AT2G33850	2.00578	5.17584e-11	7.66459e-09	E6-like protein(AT2G33850)	GO:0008150~biological_process	GO:0005576~extracellular region,GO:0071944~cell periphery	GO:0003674~molecular_function	IPR040290:Prot_E6-like
AT5G15960	2.00378	6.9186e-08	3.15751e-06	stress-responsive protein (KIN1) / stress-induced protein (KIN1)(KIN1)	GO:0006970~response to osmotic stress,GO:0007018~microtubule-based movement,GO:0007129~homologous chromosome pairing at meiosis,GO:0009409~response to cold,GO:0009414~response to water deprivation,GO:0009555~pollen development,GO:0009561~megagametogenesis,GO:0009631~cold acclimation,GO:0009737~response to abscisic acid,GO:0010017~red or far-red light signaling pathway,GO:0048316~seed development	GO:0005829~cytosol,GO:0005874~microtubule	GO:0003674~molecular_function,GO:0003777~microtubule motor activity,GO:0005524~ATP binding,GO:0008017~microtubule binding,GO:0042803~protein homodimerization activity	IPR001752:Kinesin_motor_dom,IPR019821:Kinesin_motor_CS,IPR027417:P-loop_NTPase,IPR027640:Kinesin-like_fam,IPR036961:Kinesin_motor_dom_sf
AT1G02810	2.00273	7.0726e-06	0.000133723	Plant invertase/pectin methylesterase inhibitor superfamily(AT1G02810)	GO:0042545~cell wall modification,GO:0045490~pectin catabolic process	GO:0005576~extracellular region,GO:0009507~chloroplast	GO:0004857~enzyme inhibitor activity,GO:0030599~pectinesterase activity	IPR000070:Pectinesterase_cat,IPR006501:Pectinesterase_inhib_dom,IPR011050:Pectin_lyase_fold/virulence,IPR012334:Pectin_lyas_fold,IPR033131:Pectinesterase_Asp_AS,IPR035513:Invertase/methylesterase_inhib	ath00040:Pentose and glucuronate interconversions,ath01100:Metabolic pathways
AT2G23170	1.99553	1.277e-07	5.1804e-06	Auxin-responsive GH3 family protein(GH3.3)	GO:0140964~intracellular auxin homeostasis	GO:0005634~nucleus	GO:0010279~indole-3-acetic acid amido synthetase activity	IPR004993:GH3	ath04075:Plant hormone signal transduction
AT5G45950	1.98924	1.90594e-11	3.33556e-09	GDSL-like Lipase/Acylhydrolase superfamily protein(AT5G45950)	GO:0008150~biological_process,GO:0016042~lipid catabolic process	GO:0005576~extracellular region	GO:0016788~hydrolase activity, acting on ester bonds	IPR001087:GDSL,IPR035669:SGNH_plant_lipase-like,IPR036514:SGNH_hydro_sf,IPR050592:GDSL_lipolytic_enzyme
AT1G09575	1.98048	4.85229e-08	2.34935e-06	calcium uniporter-like protein (DUF607)(AT1G09575)	GO:0006816~calcium ion transport,GO:0036444~calcium import into the mitochondrion,GO:0051560~mitochondrial calcium ion homeostasis	GO:0005739~mitochondrion,GO:0005743~mitochondrial inner membrane,GO:0009507~chloroplast,GO:0016020~membrane	GO:0005262~calcium channel activity,GO:0046872~metal ion binding	IPR006769:MCU_C,IPR039055:MCU_fam
AT2G27080	1.97931	2.33627e-06	5.61859e-05	Late embryogenesis abundant (LEA) hydroxyproline-rich glycoprotein family(AT2G27080)	GO:0042742~defense response to bacterium,GO:0098542~defense response to other organism	GO:0005634~nucleus,GO:0005886~plasma membrane,GO:0009506~plasmodesma,GO:0016020~membrane	GO:0003674~molecular_function	IPR004864:LEA_2,IPR044839:NDR1-like
AT1G18250	1.97254	2.69223e-09	2.06561e-07	Pathogenesis-related thaumatin superfamily protein(ATLP-1)	GO:0006952~defense response	GO:0005576~extracellular region	GO:0003674~molecular_function	IPR001938:Thaumatin,IPR017949:Thaumatin_CS,IPR037176:Osmotin/thaumatin-like_sf
AT1G43160	1.96428	6.52111e-06	0.000124856	uncharacterized protein(RAP2.6)	GO:0006355~regulation of DNA-templated transcription,GO:0006952~defense response,GO:0006970~response to osmotic stress,GO:0009409~response to cold,GO:0009414~response to water deprivation,GO:0009611~response to wounding,GO:0009651~response to salt stress,GO:0009658~chloroplast organization,GO:0009737~response to abscisic acid,GO:0009751~response to salicylic acid,GO:0009753~response to jasmonic a…	GO:0005634~nucleus	GO:0003677~DNA binding,GO:0003700~DNA-binding transcription factor activity	IPR001471:AP2/ERF_dom,IPR016177:DNA-bd_dom_sf,IPR036955:AP2/ERF_dom_sf,IPR044808:ERF_plant
AT4G14370	1.96206	1.28597e-14	5.0429e-12	Disease resistance protein (TIR-NBS-LRR class) family(AT4G14370)	GO:0006952~defense response,GO:0007165~signal transduction	GO:0005737~cytoplasm	GO:0016887~ATP hydrolysis activity,GO:0035091~phosphatidylinositol binding,GO:0043531~ADP binding	IPR000157:TIR_dom,IPR001611:Leu-rich_rpt,IPR002182:NB-ARC,IPR003593:AAA+_ATPase,IPR011713:Leu-rich_rpt_3,IPR027417:P-loop_NTPase,IPR032675:LRR_dom_sf,IPR035897:Toll_tir_struct_dom_sf,IPR036390:WH_DNA-bd_sf,IPR042197:Apaf_helical,IPR044974:Disease_R_plants
AT5G51950	1.96079	2.18952e-06	5.34779e-05	Glucose-methanol-choline (GMC) oxidoreductase family protein(AT5G51950)		GO:0009507~chloroplast	GO:0016614~oxidoreductase activity, acting on CH-OH group of donors,GO:0050660~flavin adenine dinucleotide binding	IPR000172:GMC_OxRdtase_N,IPR007867:GMC_OxRtase_C,IPR012132:GMC_OxRdtase,IPR036188:FAD/NAD-bd_sf,IPR051871:GMC_Oxidoreductase-Related
AT4G32460	1.95916	1.19831e-12	3.02088e-10	choice-of-anchor C domain protein, putative (Protein of unknown function, DUF642)(AT4G32460)	GO:0009624~response to nematode,GO:0009630~gravitropism,GO:0009733~response to auxin,GO:0009734~auxin-activated signaling pathway,GO:0009739~response to gibberellin,GO:0009793~embryo development ending in seed dormancy,GO:0010030~positive regulation of seed germination,GO:0045489~pectin biosynthetic process,GO:0048598~embryonic morphogenesis,GO:0048608~reproductive structure development,GO:190206…	GO:0005576~extracellular region,GO:0009505~plant-type cell wall	GO:0005515~protein binding,GO:0030234~enzyme regulator activity	IPR006946:DGR2-like_dom,IPR008979:Galactose-bd-like_sf,IPR052437:Pectin_Meth_Modulator
AT1G07370	1.94226	2.79826e-08	1.47771e-06	proliferating cellular nuclear antigen 1(PCNA1)	GO:0006260~DNA replication,GO:0006275~regulation of DNA replication,GO:0051726~regulation of cell cycle	GO:0005634~nucleus,GO:0005730~nucleolus,GO:0005737~cytoplasm,GO:0005829~cytosol	GO:0003677~DNA binding,GO:0005515~protein binding,GO:0030337~DNA polymerase processivity factor activity	IPR000730:Pr_cel_nuc_antig,IPR022648:Pr_cel_nuc_antig_N,IPR022649:Pr_cel_nuc_antig_C,IPR022659:Pr_cel_nuc_antig_CS,IPR046938:DNA_clamp_sf	ath03030:DNA replication,ath03410:Base excision repair,ath03420:Nucleotide excision repair,ath03430:Mismatch repair
AT4G08950	1.94066	4.52929e-07	1.45634e-05	Phosphate-responsive 1 family protein(EXO)	GO:0009741~response to brassinosteroid,GO:0009742~brassinosteroid mediated signaling pathway	GO:0005576~extracellular region,GO:0005794~Golgi apparatus,GO:0009505~plant-type cell wall,GO:0048046~apoplast	GO:0003674~molecular_function	IPR006766:EXORDIUM-like
AT2G35710	1.93812	3.82321e-09	2.80465e-07	Nucleotide-diphospho-sugar transferases superfamily protein(PGSIP7)		GO:0005739~mitochondrion,GO:0016020~membrane	GO:0016740~transferase activity,GO:0016757~glycosyltransferase activity,GO:0046872~metal ion binding	IPR029044:Nucleotide-diphossugar_trans,IPR050587:GNT1/Glycosyltrans_8
AT4G23060	1.93658	1.05475e-11	2.0122e-09	IQ-domain 22(IQD22)	GO:0009739~response to gibberellin	GO:0005634~nucleus,GO:0005886~plasma membrane	GO:0003674~molecular_function,GO:0005516~calmodulin binding	IPR000048:IQ_motif_EF-hand-BS,IPR025064:DUF4005
AT3G51450	1.9274	4.86696e-12	1.04104e-09	Calcium-dependent phosphotriesterase superfamily protein(AT3G51450)	GO:0009058~biosynthetic process,GO:0009611~response to wounding,GO:0009615~response to virus,GO:0009620~response to fungus,GO:0009723~response to ethylene,GO:0009751~response to salicylic acid,GO:0009753~response to jasmonic acid	GO:0005773~vacuole,GO:0009507~chloroplast	GO:0016844~strictosidine synthase activity	IPR011042:6-blade_b-propeller_TolB-like,IPR018119:Strictosidine_synth_cons-reg
AT1G65450	1.92317	1.52845e-14	5.76546e-12	HXXXD-type acyl-transferase family protein(GLC)	GO:0006355~regulation of DNA-templated transcription,GO:0009567~double fertilization forming a zygote and endosperm	GO:0005634~nucleus,GO:0005737~cytoplasm	GO:0016746~acyltransferase activity	IPR023213:CAT-like_dom_sf,IPR050317:Plant_Fungal_Acyltransferase
AT5G59870	1.91762	3.88907e-09	2.83006e-07	histone H2A 6(HTA6)	GO:0070828~heterochromatin organization	GO:0000786~nucleosome,GO:0000792~heterochromatin,GO:0005634~nucleus,GO:0005721~pericentric heterochromatin,GO:0005730~nucleolus,GO:0009506~plasmodesma,GO:0009536~plastid	GO:0003677~DNA binding,GO:0003682~chromatin binding,GO:0030527~structural constituent of chromatin,GO:0046982~protein heterodimerization activity	IPR002119:Histone_H2A,IPR007125:Histone_H2A/H2B/H3,IPR009072:Histone-fold,IPR032454:Histone_H2A_C,IPR032458:Histone_H2A_CS	ath03082:ATP-dependent chromatin remodeling
AT2G34600	1.91153	3.7526e-09	2.76882e-07	jasmonate-zim-domain protein 7(JAZ7)	GO:0006952~defense response,GO:0009611~response to wounding,GO:0009753~response to jasmonic acid,GO:0031347~regulation of defense response,GO:2000022~regulation of jasmonic acid mediated signaling pathway	GO:0005634~nucleus	GO:0005515~protein binding	IPR010399:Tify_dom,IPR040390:TIFY/JAZ
AT5G22580	1.90431	4.29033e-07	1.38918e-05	Stress responsive A/B Barrel Domain-containing protein(AT5G22580)		GO:0005829~cytosol,GO:0009507~chloroplast,GO:0009536~plastid	GO:0003674~molecular_function,GO:0046872~metal ion binding	IPR011008:Dimeric_a/b-barrel,IPR013097:Dabb,IPR044662:HS1/DABB1-like
AT5G10100	1.90023	3.47651e-09	2.58311e-07	Haloacid dehalogenase-like hydrolase (HAD) superfamily protein(TPPI)	GO:0005992~trehalose biosynthetic process	GO:0005737~cytoplasm,GO:0009507~chloroplast	GO:0004805~trehalose-phosphatase activity	IPR003337:Trehalose_PPase,IPR006379:HAD-SF_hydro_IIB,IPR023214:HAD_sf,IPR036412:HAD-like_sf,IPR044651:OTSB-like	ath00500:Starch and sucrose metabolism,ath01100:Metabolic pathways,ath01110:Biosynthesis of secondary metabolites
AT3G54560	1.89942	4.81023e-08	2.33627e-06	histone H2A 11(HTA11)	GO:0006970~response to osmotic stress,GO:0009908~flower development,GO:0010468~regulation of gene expression,GO:0016048~detection of temperature stimulus,GO:0042742~defense response to bacterium,GO:0045892~negative regulation of DNA-templated transcription	GO:0000786~nucleosome,GO:0005634~nucleus	GO:0003677~DNA binding,GO:0005515~protein binding,GO:0030527~structural constituent of chromatin,GO:0046982~protein heterodimerization activity	IPR002119:Histone_H2A,IPR007125:Histone_H2A/H2B/H3,IPR009072:Histone-fold,IPR032454:Histone_H2A_C	ath03082:ATP-dependent chromatin remodeling
AT1G21910	1.87865	1.15279e-07	4.77718e-06	Integrase-type DNA-binding superfamily protein(DREB26)	GO:0009751~response to salicylic acid,GO:0009753~response to jasmonic acid,GO:0009873~ethylene-activated signaling pathway,GO:0034605~cellular response to heat,GO:0045893~positive regulation of DNA-templated transcription,GO:0071497~cellular response to freezing	GO:0005634~nucleus	GO:0000976~transcription cis-regulatory region binding,GO:0003677~DNA binding,GO:0003700~DNA-binding transcription factor activity	IPR001471:AP2/ERF_dom,IPR016177:DNA-bd_dom_sf,IPR036955:AP2/ERF_dom_sf,IPR051032:AP2/ERF_TF_ERF_subfamily
AT1G26945	1.87663	4.91373e-09	3.49172e-07	basic helix-loop-helix (bHLH) DNA-binding superfamily protein(KDR)	GO:0006355~regulation of DNA-templated transcription,GO:0009416~response to light stimulus,GO:0040008~regulation of growth	GO:0005634~nucleus,GO:0005737~cytoplasm	GO:0046983~protein dimerization activity	IPR011598:bHLH_dom,IPR036638:HLH_DNA-bd_sf,IPR044293:PRE
AT1G75550	1.86988	1.15616e-07	4.7818e-06	glycine-rich protein(AT1G75550)		GO:0005576~extracellular region	GO:0003674~molecular_function	IPR053099:WAS/WASL-interacting_domain
AT5G55180	1.86935	2.08676e-11	3.56365e-09	O-Glycosyl hydrolases family 17 protein(AT5G55180)	GO:0005975~carbohydrate metabolic process	GO:0005576~extracellular region,GO:0009507~chloroplast	GO:0042973~glucan endo-1,3-beta-D-glucosidase activity	IPR000490:Glyco_hydro_17,IPR012946:X8,IPR017853:Glycoside_hydrolase_SF,IPR044965:Glyco_hydro_17_plant
AT4G28780	1.86667	9.1097e-06	0.00016177	GDSL-like Lipase/Acylhydrolase superfamily protein(AT4G28780)	GO:0016042~lipid catabolic process	GO:0005576~extracellular region,GO:0009507~chloroplast	GO:0016788~hydrolase activity, acting on ester bonds	IPR001087:GDSL,IPR035669:SGNH_plant_lipase-like,IPR036514:SGNH_hydro_sf,IPR051058:GDSL_Est/Lipase
AT3G29030	1.86663	1.02232e-14	4.24483e-12	expansin A5(EXPA5)	GO:0009653~anatomical structure morphogenesis,GO:0009664~plant-type cell wall organization,GO:0009826~unidimensional cell growth,GO:0009828~plant-type cell wall loosening,GO:0080022~primary root development	GO:0005576~extracellular region,GO:0016020~membrane	GO:0003674~molecular_function	IPR002963:Expansin,IPR007112:Expansin/allergen_DPBB_dom,IPR007117:Expansin_CBD,IPR007118:Expan_Lol_pI,IPR009009:RlpA-like_DPBB,IPR036749:Expansin_CBD_sf,IPR036908:RlpA-like_sf
AT1G11545	1.86509	5.01714e-11	7.53496e-09	xyloglucan endotransglucosylase/hydrolase 8(XTH8)	GO:0010411~xyloglucan metabolic process,GO:0042546~cell wall biogenesis,GO:0071555~cell wall organization	GO:0005576~extracellular region,GO:0048046~apoplast	GO:0004553~hydrolase activity, hydrolyzing O-glycosyl compounds,GO:0016762~xyloglucan:xyloglucosyl transferase activity,GO:0030247~polysaccharide binding	IPR000757:GH16,IPR008263:GH16_AS,IPR008264:Beta_glucanase,IPR010713:XET_C,IPR013320:ConA-like_dom_sf,IPR016455:XTH,IPR044791:Beta-glucanase/XTH
AT1G63710	1.8644	2.27305e-07	8.24215e-06	cytochrome P450, family 86, subfamily A, polypeptide 7(CYP86A7)	GO:0006629~lipid metabolic process,GO:0006631~fatty acid metabolic process	GO:0005575~cellular_component,GO:0016020~membrane	GO:0004497~monooxygenase activity,GO:0005506~iron ion binding,GO:0016705~oxidoreductase activity, acting on paired donors, with incorporation or reduction of molecular oxygen,GO:0016712~oxidoreductase activity, acting on paired donors, with incorporation or reduction of molecular oxygen, reduced flavin or flavoprotein as one donor, and incorporation of one atom of oxygen,GO:0018685~alkane 1-monoo…	IPR001128:Cyt_P450,IPR002401:Cyt_P450_E_grp-I,IPR017972:Cyt_P450_CS,IPR036396:Cyt_P450_sf	ath00073:Cutin, suberine and wax biosynthesis,ath01100:Metabolic pathways
AT3G10720	1.86266	6.2813e-06	0.000121141	Plant invertase/pectin methylesterase inhibitor superfamily(AT3G10720)	GO:0042545~cell wall modification,GO:0045490~pectin catabolic process	GO:0005576~extracellular region	GO:0004857~enzyme inhibitor activity,GO:0030599~pectinesterase activity	IPR000070:Pectinesterase_cat,IPR006501:Pectinesterase_inhib_dom,IPR011050:Pectin_lyase_fold/virulence,IPR012334:Pectin_lyas_fold,IPR033131:Pectinesterase_Asp_AS,IPR035513:Invertase/methylesterase_inhib	ath00040:Pentose and glucuronate interconversions,ath01100:Metabolic pathways
AT2G01610	1.83308	5.35197e-13	1.41667e-10	Plant invertase/pectin methylesterase inhibitor superfamily protein(AT2G01610)	GO:0043086~negative regulation of catalytic activity	GO:0005576~extracellular region	GO:0004857~enzyme inhibitor activity	IPR006501:Pectinesterase_inhib_dom,IPR035513:Invertase/methylesterase_inhib,IPR051955:PME_Inhibitor
AT1G72970	1.82523	1.66604e-10	2.05117e-08	Glucose-methanol-choline (GMC) oxidoreductase family protein(HTH)	GO:0007267~cell-cell signaling,GO:0009553~embryo sac development,GO:0010430~fatty acid omega-oxidation	GO:0005576~extracellular region	GO:0016614~oxidoreductase activity, acting on CH-OH group of donors,GO:0046593~mandelonitrile lyase activity,GO:0050660~flavin adenine dinucleotide binding	IPR000172:GMC_OxRdtase_N,IPR007867:GMC_OxRtase_C,IPR012132:GMC_OxRdtase,IPR036188:FAD/NAD-bd_sf,IPR051871:GMC_Oxidoreductase-Related	ath00073:Cutin, suberine and wax biosynthesis
AT2G22470	1.81879	1.85781e-10	2.26098e-08	arabinogalactan protein 2(AGP2)		GO:0005737~cytoplasm,GO:0005886~plasma membrane,GO:0016020~membrane,GO:0098552~side of membrane	GO:0003674~molecular_function	IPR044959:AGP
AT1G72520	1.81786	1.12355e-07	4.69543e-06	PLAT/LH2 domain-containing lipoxygenase family protein(LOX4)	GO:0006633~fatty acid biosynthetic process,GO:0006952~defense response,GO:0009555~pollen development,GO:0009611~response to wounding,GO:0009617~response to bacterium,GO:0009695~jasmonic acid biosynthetic process,GO:0009901~anther dehiscence,GO:0010193~response to ozone,GO:0031408~oxylipin biosynthetic process,GO:0034440~lipid oxidation,GO:0048653~anther development,GO:0080086~stamen filament deve…	GO:0009507~chloroplast	GO:0016165~linoleate 13S-lipoxygenase activity,GO:0016702~oxidoreductase activity, acting on single donors with incorporation of molecular oxygen, incorporation of two atoms of oxygen,GO:0046872~metal ion binding	IPR000907:LipOase,IPR001024:PLAT/LH2_dom,IPR001246:LipOase_plant,IPR013819:LipOase_C,IPR020833:LipOase_Fe_BS,IPR020834:LipOase_CS,IPR027433:Lipoxygenase_dom_3,IPR036226:LipOase_C_sf,IPR036392:PLAT/LH2_dom_sf,IPR042057:Lipoxy_PLAT/LH2	ath00591:Linoleic acid metabolism,ath00592:alpha-Linolenic acid metabolism,ath01100:Metabolic pathways,ath01110:Biosynthesis of secondary metabolites
AT1G22550	1.81015	6.68401e-17	4.42314e-14	Major facilitator superfamily protein(AT1G22550)	GO:0015706~nitrate transmembrane transport	GO:0009705~plant-type vacuole membrane,GO:0016020~membrane	GO:0042937~tripeptide transmembrane transporter activity,GO:0071916~dipeptide transmembrane transporter activity,GO:0080054~low-affinity nitrate transmembrane transporter activity	IPR000109:POT_fam,IPR018456:PTR2_symporter_CS,IPR036259:MFS_trans_sf,IPR044739:NRT1/PTR
AT4G23810	1.81	3.08278e-13	8.5896e-11	WRKY family transcription factor(WRKY53)	GO:0009617~response to bacterium,GO:0009751~response to salicylic acid,GO:0010150~leaf senescence,GO:0010193~response to ozone,GO:0031347~regulation of defense response,GO:0042542~response to hydrogen peroxide,GO:0042742~defense response to bacterium,GO:0045893~positive regulation of DNA-templated transcription,GO:2000022~regulation of jasmonic acid mediated signaling pathway	GO:0005634~nucleus,GO:0009507~chloroplast	GO:0000981~DNA-binding transcription factor activity, RNA polymerase II-specific,GO:0003677~DNA binding,GO:0003700~DNA-binding transcription factor activity,GO:0005515~protein binding,GO:0043565~sequence-specific DNA binding	IPR003657:WRKY_dom,IPR036576:WRKY_dom_sf,IPR044810:WRKY_plant
AT3G61198	1.8097	1.57391e-07	6.13794e-06	ncRNA(AT3G61198)	GO:0008150~biological_process	GO:0005575~cellular_component	GO:0003674~molecular_function
AT2G14290	1.80034	9.41142e-06	0.000166219	LL-diaminopimelate protein (DUF295)(AT2G14290)		GO:0009507~chloroplast	GO:0003674~molecular_function	IPR001810:F-box_dom,IPR005174:DUF295,IPR036047:F-box-like_dom_sf,IPR050942:F-box_BR-signaling
AT5G64310	1.79532	2.02164e-07	7.52378e-06	arabinogalactan protein 1(AGP1)		GO:0005886~plasma membrane,GO:0016020~membrane,GO:0098552~side of membrane	GO:0003674~molecular_function	IPR044959:AGP
AT2G28790	1.79523	4.98868e-12	1.0564e-09	Pathogenesis-related thaumatin superfamily protein(AT2G28790)	GO:0006952~defense response	GO:0005576~extracellular region,GO:0009505~plant-type cell wall,GO:0009506~plasmodesma,GO:0099503~secretory vesicle	GO:0003674~molecular_function	IPR001938:Thaumatin,IPR037176:Osmotin/thaumatin-like_sf
AT4G34900	1.79282	2.08524e-07	7.65287e-06	xanthine dehydrogenase 2(XDH2)	GO:0046110~xanthine metabolic process	GO:0005886~plasma membrane	GO:0004854~xanthine dehydrogenase activity,GO:0005506~iron ion binding,GO:0016491~oxidoreductase activity,GO:0051537~2 iron, 2 sulfur cluster binding,GO:0071949~FAD binding	IPR000674:Ald_Oxase/Xan_DH_a/b,IPR001041:2Fe-2S_ferredoxin-type,IPR002346:Mopterin_DH_FAD-bd,IPR002888:2Fe-2S-bd,IPR005107:CO_DH_flav_C,IPR006058:2Fe2S_fd_BS,IPR008274:AldOxase/xan_DH_MoCoBD1,IPR012675:Beta-grasp_dom_sf,IPR016166:FAD-bd_PCMH,IPR016167:FAD-bd_PCMH_sub1,IPR016169:FAD-bd_PCMH_sub2,IPR016208:Ald_Oxase/xanthine_DH-like,IPR036010:2Fe-2S_ferredoxin-like_sf,IPR036318:FAD-bd_PCMH-like_sf,…	ath00230:Purine metabolism,ath00232:Caffeine metabolism,ath01100:Metabolic pathways,ath01110:Biosynthesis of secondary metabolites,ath01232:Nucleotide metabolism,ath04146:Peroxisome
AT1G10560	1.78799	1.4609e-08	8.66556e-07	plant U-box 18(PUB18)	GO:0009738~abscisic acid-activated signaling pathway,GO:0009787~regulation of abscisic acid-activated signaling pathway,GO:0010029~regulation of seed germination,GO:0010119~regulation of stomatal movement,GO:0016567~protein ubiquitination	GO:0005737~cytoplasm,GO:0012505~endomembrane system,GO:0016020~membrane	GO:0004842~ubiquitin-protein transferase activity,GO:0005515~protein binding,GO:0061630~ubiquitin protein ligase activity	IPR000225:Armadillo,IPR003613:Ubox_domain,IPR011989:ARM-like,IPR013083:Znf_RING/FYVE/PHD,IPR016024:ARM-type_fold,IPR045210:RING-Ubox_PUB
AT1G29920	1.78676	4.07468e-26	1.43809e-22	chlorophyll A/B-binding protein 2(CAB2)	GO:0009750~response to fructose,GO:0009765~photosynthesis, light harvesting	GO:0005634~nucleus,GO:0005739~mitochondrion,GO:0009507~chloroplast,GO:0009522~photosystem I,GO:0009523~photosystem II,GO:0009534~chloroplast thylakoid,GO:0009535~chloroplast thylakoid membrane,GO:0009579~thylakoid,GO:0010287~plastoglobule,GO:0048046~apoplast	GO:0003729~mRNA binding,GO:0005515~protein binding,GO:0016168~chlorophyll binding,GO:0046872~metal ion binding	IPR001344:Chloro_AB-bd_pln,IPR022796:Chloroa_b-bind	ath00196:Photosynthesis - antenna proteins,ath01100:Metabolic pathways
AT1G10640	1.77391	2.63843e-09	2.0391e-07	Pectin lyase-like superfamily protein(AT1G10640)	GO:0005975~carbohydrate metabolic process,GO:0071555~cell wall organization	GO:0005576~extracellular region	GO:0004650~polygalacturonase activity,GO:0016829~lyase activity	IPR000743:Glyco_hydro_28,IPR006626:PbH1,IPR011050:Pectin_lyase_fold/virulence,IPR012334:Pectin_lyas_fold
AT1G66430	1.76457	1.44192e-09	1.23262e-07	pfkB-like carbohydrate kinase family protein(AT1G66430)	GO:0006000~fructose metabolic process,GO:0006633~fatty acid biosynthetic process,GO:0016051~carbohydrate biosynthetic process,GO:0019252~starch biosynthetic process	GO:0005737~cytoplasm,GO:0009507~chloroplast,GO:0009570~chloroplast stroma	GO:0005524~ATP binding,GO:0008865~fructokinase activity	IPR002139:Ribo/fructo_kinase,IPR002173:Carboh/pur_kinase_PfkB_CS,IPR011611:PfkB_dom,IPR029056:Ribokinase-like,IPR050306:PfkB_Carbo_kinase	ath00051:Fructose and mannose metabolism,ath00500:Starch and sucrose metabolism,ath00520:Amino sugar and nucleotide sugar metabolism,ath01100:Metabolic pathways,ath01110:Biosynthesis of secondary metabolites,ath01250:Biosynthesis of nucleotide sugars
AT5G13060	1.76441	7.69344e-08	3.42982e-06	ARMADILLO BTB protein 1(ABAP1)	GO:0006261~DNA-templated DNA replication,GO:0008285~negative regulation of cell population proliferation,GO:0016567~protein ubiquitination,GO:0042127~regulation of cell population proliferation,GO:2000104~negative regulation of DNA-templated DNA replication	GO:0005634~nucleus,GO:0009507~chloroplast,GO:0031261~DNA replication preinitiation complex	GO:0005515~protein binding	IPR000210:BTB/POZ_dom,IPR000225:Armadillo,IPR011333:SKP1/BTB/POZ_sf,IPR011989:ARM-like,IPR016024:ARM-type_fold,IPR044282:ABAP1/ARIA
AT3G19200	1.75778	5.16576e-05	0.000643094	uncharacterized protein(AT3G19200)		GO:0005634~nucleus	GO:0003674~molecular_function
AT1G02660	1.75703	1.8866e-12	4.43986e-10	alpha/beta-Hydrolases superfamily protein(AT1G02660)	GO:0002213~defense response to insect,GO:0006629~lipid metabolic process,GO:0009628~response to abiotic stimulus,GO:0016042~lipid catabolic process,GO:0031349~positive regulation of defense response	GO:0005576~extracellular region,GO:0009507~chloroplast,GO:0009570~chloroplast stroma,GO:0016020~membrane,GO:0031969~chloroplast membrane	GO:0008970~phospholipase A1 activity,GO:0047714~galactolipase activity	IPR002921:Fungal_lipase-type,IPR029058:AB_hydrolase_fold,IPR043367:PLIP1/2/3
AT5G61000	1.75526	5.81264e-10	5.80606e-08	Replication factor-A protein 1-like protein(RPA70D)	GO:0006260~DNA replication,GO:0006281~DNA repair,GO:0006310~DNA recombination	GO:0005634~nucleus	GO:0003677~DNA binding,GO:0004386~helicase activity,GO:0005524~ATP binding,GO:0016787~hydrolase activity,GO:0046872~metal ion binding	IPR004365:NA-bd_OB_tRNA,IPR004591:Rfa1,IPR007199:Rep_factor-A_N,IPR012340:NA-bd_OB-fold,IPR013955:Rep_factor-A_C,IPR031657:REPA_OB_2,IPR047192:Euk_RPA1_DBD_C	ath03030:DNA replication,ath03420:Nucleotide excision repair,ath03430:Mismatch repair,ath03440:Homologous recombination,ath03460:Fanconi anemia pathway
AT4G03210	1.74867	1.13923e-13	3.71144e-11	xyloglucan endotransglucosylase/hydrolase 9(XTH9)	GO:0009834~plant-type secondary cell wall biogenesis,GO:0010089~xylem development,GO:0010411~xyloglucan metabolic process,GO:0042546~cell wall biogenesis,GO:0044042~glucan metabolic process,GO:0071555~cell wall organization	GO:0005576~extracellular region,GO:0048046~apoplast	GO:0004553~hydrolase activity, hydrolyzing O-glycosyl compounds,GO:0016762~xyloglucan:xyloglucosyl transferase activity,GO:0030247~polysaccharide binding	IPR000757:GH16,IPR008264:Beta_glucanase,IPR010713:XET_C,IPR013320:ConA-like_dom_sf,IPR016455:XTH,IPR044791:Beta-glucanase/XTH
AT2G07707	1.74478	5.17378e-05	0.000643713	Plant mitochondrial ATPase, F0 complex, subunit 8 protein(AT2G07707)		GO:0000325~plant-type vacuole,GO:0005739~mitochondrion,GO:0009507~chloroplast,GO:0031966~mitochondrial membrane	GO:0005524~ATP binding,GO:0046933~proton-transporting ATP synthase activity, rotational mechanism,GO:0046961~proton-transporting ATPase activity, rotational mechanism,GO:0050897~cobalt ion binding	IPR003319:YMF19-like_N,IPR009455:YMF19,IPR044975:YMF19-like	ath00190:Oxidative phosphorylation,ath00195:Photosynthesis,ath01100:Metabolic pathways
AT5G64080	1.73924	2.79357e-18	2.57203e-15	Bifunctional inhibitor/lipid-transfer protein/seed storage 2S albumin superfamily protein(XYP1)	GO:0006869~lipid transport,GO:0010089~xylem development	GO:0005886~plasma membrane,GO:0009536~plastid,GO:0016020~membrane,GO:0098552~side of membrane	GO:0008289~lipid binding	IPR000528:Plant_nsLTP,IPR016140:Bifunc_inhib/LTP/seed_store,IPR036312:Bifun_inhib/LTP/seed_sf,IPR043325:LTSS
AT1G19380	1.73535	7.55618e-06	0.000140427	sugar, putative (DUF1195)(AT1G19380)		GO:0005575~cellular_component,GO:0016020~membrane	GO:0003674~molecular_function	IPR010608:DUF1195
AT1G30135	1.73163	2.9458e-05	0.000412841	jasmonate-zim-domain protein 8(JAZ8)	GO:0006952~defense response,GO:0009611~response to wounding,GO:0031347~regulation of defense response,GO:2000022~regulation of jasmonic acid mediated signaling pathway	GO:0005634~nucleus	GO:0005515~protein binding	IPR010399:Tify_dom,IPR018467:CCT_CS,IPR040390:TIFY/JAZ
AT1G09457	1.73064	1.32295e-05	0.000216164
AT3G45960	1.72531	2.05638e-10	2.4742e-08	expansin-like A3(EXLA3)	GO:0009653~anatomical structure morphogenesis,GO:0009826~unidimensional cell growth,GO:0009828~plant-type cell wall loosening	GO:0005576~extracellular region,GO:0009505~plant-type cell wall,GO:0009506~plasmodesma	GO:0003674~molecular_function	IPR007112:Expansin/allergen_DPBB_dom,IPR007117:Expansin_CBD,IPR007118:Expan_Lol_pI,IPR009009:RlpA-like_DPBB,IPR036749:Expansin_CBD_sf,IPR036908:RlpA-like_sf
AT4G30180	1.72316	2.52687e-06	5.93885e-05	uncharacterized protein(AT4G30180)	GO:0006355~regulation of DNA-templated transcription	GO:0005634~nucleus	GO:0003677~DNA binding,GO:0003700~DNA-binding transcription factor activity,GO:0005515~protein binding	IPR044549:bHLH_AtIBH1-like,IPR044660:IBH1-like
AT5G19100	1.7176	5.18377e-05	0.000644577	Eukaryotic aspartyl protease family protein(AT5G19100)	GO:0006508~proteolysis	GO:0005576~extracellular region	GO:0004190~aspartic-type endopeptidase activity	IPR001461:Aspartic_peptidase_A1,IPR021109:Peptidase_aspartic_dom_sf,IPR032799:TAXi_C,IPR032861:TAXi_N,IPR033121:PEPTIDASE_A1
AT4G14695	1.71723	5.75157e-06	0.000112773	Uncharacterized protein family (UPF0041)(AT4G14695)	GO:0006850~mitochondrial pyruvate transmembrane transport	GO:0005739~mitochondrion,GO:0005743~mitochondrial inner membrane,GO:0009507~chloroplast	GO:0003674~molecular_function	IPR005336:MPC
AT2G38995	1.71603	4.68819e-07	1.49965e-05	O-acyltransferase (WSD1-like) family protein(AT2G38995)	GO:0019432~triglyceride biosynthetic process,GO:0045017~glycerolipid biosynthetic process	GO:0005634~nucleus,GO:0005789~endoplasmic reticulum membrane,GO:0005886~plasma membrane	GO:0004144~diacylglycerol O-acyltransferase activity,GO:0008374~O-acyltransferase activity,GO:0047196~long-chain-alcohol O-fatty-acyltransferase activity	IPR004255:O-acyltransferase_WSD1_N,IPR009721:O-acyltransferase_WSD1_C,IPR023213:CAT-like_dom_sf,IPR045034:O-acyltransferase_WSD1-like
AT3G45970	1.71152	2.79149e-18	2.57203e-15	expansin-like A1(EXLA1)	GO:0009653~anatomical structure morphogenesis,GO:0009826~unidimensional cell growth,GO:0009828~plant-type cell wall loosening	GO:0005576~extracellular region,GO:0005794~Golgi apparatus,GO:0009505~plant-type cell wall,GO:0009506~plasmodesma,GO:0016020~membrane,GO:0099503~secretory vesicle	GO:0003674~molecular_function	IPR007112:Expansin/allergen_DPBB_dom,IPR007117:Expansin_CBD,IPR007118:Expan_Lol_pI,IPR009009:RlpA-like_DPBB,IPR036749:Expansin_CBD_sf,IPR036908:RlpA-like_sf
AT3G54180	1.70788	1.10542e-08	7.05072e-07	cyclin-dependent kinase B1;1(CDKB1;1)	GO:0009826~unidimensional cell growth,GO:0010376~stomatal complex formation,GO:0010444~guard mother cell differentiation,GO:0032875~regulation of DNA endoreduplication,GO:0042023~DNA endoreduplication,GO:0046777~protein autophosphorylation,GO:0048825~cotyledon development,GO:0051301~cell division,GO:1902806~regulation of cell cycle G1/S phase transition,GO:2000037~regulation of stomatal complex p…	GO:0005634~nucleus,GO:0005737~cytoplasm	GO:0004674~protein serine/threonine kinase activity,GO:0004693~cyclin-dependent protein serine/threonine kinase activity,GO:0005515~protein binding,GO:0005524~ATP binding,GO:0106310~protein serine kinase activity,GO:0140833~RNA polymerase II CTD heptapeptide repeat Y1 kinase activity,GO:0140834~RNA polymerase II CTD heptapeptide repeat S2 kinase activity,GO:0140835~RNA polymerase II CTD heptapept…	IPR000719:Prot_kinase_dom,IPR008271:Ser/Thr_kinase_AS,IPR011009:Kinase-like_dom_sf,IPR017441:Protein_kinase_ATP_BS,IPR050108:CDK
AT5G08330	1.70411	6.84868e-11	9.7334e-09	TCP family transcription factor(TCP11)	GO:0006355~regulation of DNA-templated transcription,GO:0042752~regulation of circadian rhythm,GO:0042753~positive regulation of circadian rhythm,GO:0043433~negative regulation of DNA-binding transcription factor activity,GO:0048511~rhythmic process	GO:0005634~nucleus	GO:0003677~DNA binding,GO:0003700~DNA-binding transcription factor activity,GO:0005515~protein binding	IPR005333:Transcription_factor_TCP,IPR017887:TF_TCP_subgr	ath04712:Circadian rhythm - plant
AT1G29910	1.7036	5.72466e-22	1.01021e-18	chlorophyll A/B binding protein 3(CAB3)	GO:0009750~response to fructose,GO:0009765~photosynthesis, light harvesting	GO:0005634~nucleus,GO:0005739~mitochondrion,GO:0009507~chloroplast,GO:0009522~photosystem I,GO:0009523~photosystem II,GO:0009534~chloroplast thylakoid,GO:0009535~chloroplast thylakoid membrane,GO:0009579~thylakoid,GO:0010287~plastoglobule,GO:0048046~apoplast	GO:0003729~mRNA binding,GO:0016168~chlorophyll binding,GO:0046872~metal ion binding	IPR001344:Chloro_AB-bd_pln,IPR022796:Chloroa_b-bind	ath00196:Photosynthesis - antenna proteins,ath01100:Metabolic pathways
AT2G25460	1.70324	6.6079e-08	3.02876e-06	EEIG1/EHBP1 protein amino-terminal domain protein(AT2G25460)		GO:0005634~nucleus	GO:0003674~molecular_function	IPR019448:NT-C2,IPR035892:C2_domain_sf
AT5G55730	1.70083	5.66796e-07	1.75219e-05	FASCICLIN-like arabinogalactan 1(FLA1)	GO:0048364~root development,GO:0048367~shoot system development	GO:0005886~plasma membrane,GO:0009505~plant-type cell wall,GO:0009507~chloroplast,GO:0009536~plastid,GO:0016020~membrane,GO:0048046~apoplast,GO:0098552~side of membrane,GO:0099503~secretory vesicle	GO:0003674~molecular_function	IPR000782:FAS1_domain,IPR033254:Plant_FLA,IPR036378:FAS1_dom_sf
AT2G21510	1.69476	2.21936e-07	8.07511e-06	DNAJ heat shock N-terminal domain-containing protein(AT2G21510)		GO:0005737~cytoplasm,GO:0005886~plasma membrane	GO:0003674~molecular_function	IPR001623:DnaJ_domain,IPR018253:DnaJ_domain_CS,IPR026894:DnaJ_X,IPR036869:J_dom_sf,IPR052423:EMIR
AT1G08643	1.69075	7.53448e-09	5.06508e-07
AT1G30370	1.68625	6.1578e-05	0.000737987	alpha/beta-Hydrolases superfamily protein(DLAH)	GO:0006629~lipid metabolic process,GO:0010214~seed coat development,GO:0016042~lipid catabolic process	GO:0005576~extracellular region,GO:0005739~mitochondrion,GO:0009507~chloroplast	GO:0008970~phospholipase A1 activity,GO:0047714~galactolipase activity	IPR002921:Fungal_lipase-type,IPR029058:AB_hydrolase_fold
AT1G29071	1.68523	2.68879e-08	1.42763e-06	ncRNA(SNOR105)	GO:0042254~ribosome biogenesis	GO:0005575~cellular_component	GO:0003674~molecular_function
AT5G50335	1.67942	3.78404e-05	0.000500817	uncharacterized protein(AT5G50335)		GO:0005634~nucleus	GO:0003674~molecular_function
AT1G80840	1.67903	1.73124e-05	0.000270441	WRKY DNA-binding protein 40(WRKY40)	GO:0002237~response to molecule of bacterial origin,GO:0009611~response to wounding,GO:0009751~response to salicylic acid,GO:0031347~regulation of defense response,GO:0042742~defense response to bacterium,GO:0045892~negative regulation of DNA-templated transcription,GO:0050691~regulation of defense response to virus by host,GO:0050832~defense response to fungus	GO:0005634~nucleus	GO:0000976~transcription cis-regulatory region binding,GO:0003700~DNA-binding transcription factor activity,GO:0005515~protein binding,GO:0043565~sequence-specific DNA binding	IPR003657:WRKY_dom,IPR036576:WRKY_dom_sf,IPR044810:WRKY_plant
AT5G26220	1.67819	7.3468e-06	0.00013779	ChaC-like family protein(AT5G26220)	GO:0006751~glutathione catabolic process,GO:0010288~response to lead ion,GO:0046686~response to cadmium ion	GO:0005737~cytoplasm	GO:0003839~gamma-glutamylcyclotransferase activity,GO:0061928~glutathione specific gamma-glutamylcyclotransferase activity	IPR006840:ChaC,IPR013024:GGCT-like	ath00480:Glutathione metabolism,ath01100:Metabolic pathways
AT3G44860	1.67812	4.5004e-09	3.20877e-07	farnesoic acid carboxyl-O-methyltransferase(FAMT)	GO:0002238~response to molecule of fungal origin,GO:0009611~response to wounding,GO:0009751~response to salicylic acid,GO:0009753~response to jasmonic acid,GO:0032259~methylation,GO:0080027~response to herbivore	GO:0009507~chloroplast	GO:0008168~methyltransferase activity,GO:0019010~farnesoic acid O-methyltransferase activity,GO:0046872~metal ion binding	IPR005299:MeTrfase_7,IPR029063:SAM-dependent_MTases_sf,IPR042086:MeTrfase_capping
AT1G51820	1.67651	3.60794e-13	9.92229e-11	Leucine-rich repeat protein kinase family protein(AT1G51820)	GO:0006468~protein phosphorylation,GO:0016310~phosphorylation	GO:0005575~cellular_component,GO:0016020~membrane	GO:0004672~protein kinase activity,GO:0004674~protein serine/threonine kinase activity,GO:0004676~3-phosphoinositide-dependent protein kinase activity,GO:0004677~DNA-dependent protein kinase activity,GO:0004679~AMP-activated protein kinase activity,GO:0004694~eukaryotic translation initiation factor 2alpha kinase activity,GO:0004711~ribosomal protein S6 kinase activity,GO:0005515~protein binding,…	IPR000719:Prot_kinase_dom,IPR001611:Leu-rich_rpt,IPR008271:Ser/Thr_kinase_AS,IPR011009:Kinase-like_dom_sf,IPR017441:Protein_kinase_ATP_BS,IPR024788:Malectin-like_Carb-bd_dom,IPR032675:LRR_dom_sf
AT5G36925	1.67497	5.77553e-05	0.000701277	uncharacterized protein(AT5G36925)	GO:0009408~response to heat,GO:0009409~response to cold,GO:0009620~response to fungus,GO:0009751~response to salicylic acid,GO:0009753~response to jasmonic acid,GO:0042542~response to hydrogen peroxide,GO:0043207~response to external biotic stimulus,GO:0050832~defense response to fungus,GO:0098542~defense response to other organism	GO:0005634~nucleus,GO:0005737~cytoplasm,GO:0005739~mitochondrion,GO:0005783~endoplasmic reticulum,GO:0005886~plasma membrane,GO:0048046~apoplast,GO:0090404~pollen tube tip	GO:0030275~LRR domain binding,GO:0033612~receptor serine/threonine kinase binding
AT3G12145	1.66887	7.09624e-11	9.91535e-09	Leucine-rich repeat (LRR) family protein(FLR1)	GO:0010228~vegetative to reproductive phase transition of meristem,GO:0048510~regulation of timing of transition from vegetative to reproductive phase,GO:0048574~long-day photoperiodism, flowering	GO:0005576~extracellular region,GO:0005634~nucleus,GO:0005737~cytoplasm,GO:0005886~plasma membrane,GO:0048471~perinuclear region of cytoplasm	GO:0005515~protein binding,GO:0008134~transcription factor binding	IPR001611:Leu-rich_rpt,IPR013210:LRR_N_plant-typ,IPR032675:LRR_dom_sf,IPR051848:PGIP
AT4G39330	1.66764	1.56579e-09	1.31576e-07	cinnamyl alcohol dehydrogenase 9(CAD9)	GO:0009809~lignin biosynthetic process	GO:0005737~cytoplasm,GO:0005829~cytosol,GO:0005886~plasma membrane,GO:0048046~apoplast	GO:0005515~protein binding,GO:0008270~zinc ion binding,GO:0016616~oxidoreductase activity, acting on the CH-OH group of donors, NAD or NADP as acceptor,GO:0045551~cinnamyl-alcohol dehydrogenase activity	IPR002328:ADH_Zn_CS,IPR011032:GroES-like_sf,IPR013149:ADH-like_C,IPR013154:ADH-like_N,IPR020843:PKS_ER,IPR036291:NAD(P)-bd_dom_sf,IPR047109:CAD-like	ath00940:Phenylpropanoid biosynthesis,ath01100:Metabolic pathways,ath01110:Biosynthesis of secondary metabolites
AT4G22010	1.66643	3.67963e-05	0.000492228	SKU5 similar 4(sks4)		GO:0005576~extracellular region,GO:0009506~plasmodesma	GO:0005507~copper ion binding,GO:0016491~oxidoreductase activity	IPR001117:Cu-oxidase_2nd,IPR008972:Cupredoxin,IPR011706:Cu-oxidase_C,IPR011707:Cu-oxidase-like_N,IPR045087:Cu-oxidase_fam
AT5G57560	1.66038	8.35113e-06	0.000151797	Xyloglucan endotransglucosylase/hydrolase family protein(TCH4)	GO:0009408~response to heat,GO:0009409~response to cold,GO:0009612~response to mechanical stimulus,GO:0009664~plant-type cell wall organization,GO:0009733~response to auxin,GO:0009741~response to brassinosteroid,GO:0010411~xyloglucan metabolic process,GO:0042546~cell wall biogenesis,GO:0071456~cellular response to hypoxia,GO:0071555~cell wall organization	GO:0005794~Golgi apparatus,GO:0009505~plant-type cell wall,GO:0009507~chloroplast,GO:0048046~apoplast,GO:0099503~secretory vesicle	GO:0004553~hydrolase activity, hydrolyzing O-glycosyl compounds,GO:0016762~xyloglucan:xyloglucosyl transferase activity,GO:0030247~polysaccharide binding	IPR000757:GH16,IPR008263:GH16_AS,IPR008264:Beta_glucanase,IPR010713:XET_C,IPR013320:ConA-like_dom_sf,IPR016455:XTH,IPR044791:Beta-glucanase/XTH	ath04075:Plant hormone signal transduction
AT5G54970	1.65882	1.87059e-06	4.69888e-05	uncharacterized protein(AT5G54970)	GO:0008150~biological_process	GO:0005634~nucleus	GO:0003674~molecular_function
AT5G07030	1.65818	5.13148e-07	1.61944e-05	Eukaryotic aspartyl protease family protein(AT5G07030)	GO:0006508~proteolysis	GO:0005576~extracellular region,GO:0009505~plant-type cell wall	GO:0003677~DNA binding,GO:0004190~aspartic-type endopeptidase activity	IPR001461:Aspartic_peptidase_A1,IPR021109:Peptidase_aspartic_dom_sf,IPR032799:TAXi_C,IPR032861:TAXi_N,IPR033121:PEPTIDASE_A1
AT1G17700	1.65659	6.87831e-06	0.000130398	prenylated RAB acceptor 1.F1(PRA1.F1)	GO:0016192~vesicle-mediated transport	GO:0005783~endoplasmic reticulum,GO:0005886~plasma membrane,GO:0010008~endosome membrane,GO:0016020~membrane	GO:0003674~molecular_function	IPR004895:Prenylated_rab_accept_PRA1
AT5G38120	1.65576	2.1441e-11	3.61458e-09	AMP-dependent synthetase and ligase family protein(4CL8)	GO:0006744~ubiquinone biosynthetic process	GO:0005777~peroxisome,GO:0009507~chloroplast,GO:0016020~membrane	GO:0003824~catalytic activity,GO:0005524~ATP binding,GO:0016207~4-coumarate-CoA ligase activity,GO:0016405~CoA-ligase activity,GO:0016874~ligase activity	IPR000873:AMP-dep_synth/lig_dom,IPR020845:AMP-binding_CS,IPR025110:AMP-bd_C,IPR042099:ANL_N_sf,IPR045851:AMP-bd_C_sf	ath00592:alpha-Linolenic acid metabolism,ath01100:Metabolic pathways,ath01110:Biosynthesis of secondary metabolites
AT4G15150	1.65038	2.63451e-05	0.000377715	glycine-rich protein(AT4G15150)		GO:0005575~cellular_component	GO:0003674~molecular_function
AT3G50890	1.64665	1.05161e-05	0.000180316	homeobox protein 28(HB28)		GO:0005634~nucleus	GO:0003677~DNA binding,GO:0005515~protein binding,GO:0042803~protein homodimerization activity,GO:0046872~metal ion binding	IPR001356:HD,IPR006455:Homeodomain_ZF_HD,IPR006456:ZF_HD_homeobox_Cys/His_dimer,IPR009057:Homeodomain-like_sf
AT1G64760	1.63716	4.07521e-11	6.29903e-09	O-Glycosyl hydrolases family 17 protein(AT1G64760)	GO:0005975~carbohydrate metabolic process,GO:0006952~defense response,GO:0009664~plant-type cell wall organization	GO:0005576~extracellular region,GO:0005634~nucleus,GO:0005886~plasma membrane,GO:0009506~plasmodesma,GO:0016020~membrane,GO:0048046~apoplast,GO:0098552~side of membrane	GO:0042973~glucan endo-1,3-beta-D-glucosidase activity	IPR000490:Glyco_hydro_17,IPR012946:X8,IPR017853:Glycoside_hydrolase_SF,IPR044965:Glyco_hydro_17_plant
AT3G46940	1.63319	5.41284e-10	5.53855e-08	DUTP-PYROPHOSPHATASE-LIKE 1(DUT1)	GO:0006226~dUMP biosynthetic process,GO:0006281~DNA repair,GO:0046081~dUTP catabolic process,GO:0046104~thymidine metabolic process	GO:0005739~mitochondrion,GO:0009507~chloroplast	GO:0000287~magnesium ion binding,GO:0004170~dUTP diphosphatase activity,GO:0042802~identical protein binding	IPR008181:dUTPase,IPR029054:dUTPase-like,IPR033704:dUTPase_trimeric,IPR036157:dUTPase-like_sf	ath00240:Pyrimidine metabolism,ath01100:Metabolic pathways,ath01232:Nucleotide metabolism
AT5G64750	1.63105	3.56535e-05	0.000481299	Integrase-type DNA-binding superfamily protein(ABR1)	GO:0006355~regulation of DNA-templated transcription,GO:0006970~response to osmotic stress,GO:0009737~response to abscisic acid,GO:0009738~abscisic acid-activated signaling pathway,GO:0009749~response to glucose,GO:0009788~negative regulation of abscisic acid-activated signaling pathway,GO:0009873~ethylene-activated signaling pathway,GO:0050832~defense response to fungus,GO:0062211~root regenerat…	GO:0005634~nucleus	GO:0003677~DNA binding,GO:0003700~DNA-binding transcription factor activity	IPR001471:AP2/ERF_dom,IPR016177:DNA-bd_dom_sf,IPR036955:AP2/ERF_dom_sf,IPR044808:ERF_plant
AT3G09520	1.62793	3.23173e-07	1.10024e-05	exocyst subunit exo70 family protein H4(EXO70H4)	GO:0006887~exocytosis,GO:0015031~protein transport	GO:0000145~exocyst,GO:0005634~nucleus	GO:0005546~phosphatidylinositol-4,5-bisphosphate binding	IPR004140:Exo70,IPR016159:Cullin_repeat-like_dom_sf,IPR046364:Exo70_C
AT4G18670	1.62295	5.91678e-06	0.000114948	Leucine-rich repeat (LRR) family protein(AT4G18670)	GO:0071555~cell wall organization	GO:0005576~extracellular region,GO:0009506~plasmodesma	GO:0005199~structural constituent of cell wall	IPR001611:Leu-rich_rpt,IPR013210:LRR_N_plant-typ,IPR032675:LRR_dom_sf,IPR051582:LRR_extensin-like_regulator
AT5G15230	1.62248	1.91948e-05	0.000292214	GAST1 protein homolog 4(GASA4)	GO:0009739~response to gibberellin,GO:0009740~gibberellic acid mediated signaling pathway,GO:0045454~cell redox homeostasis	GO:0005576~extracellular region	GO:0003674~molecular_function	IPR003854:GASA
AT3G54020	1.62074	1.90219e-07	7.16354e-06	Inositol phosphorylceramide synthase 1(AtIPCS1)	GO:0006665~sphingolipid metabolic process,GO:0030148~sphingolipid biosynthetic process	GO:0005886~plasma membrane,GO:0016020~membrane	GO:0016780~phosphotransferase activity, for other substituted phosphate groups,GO:0045140~inositol phosphoceramide synthase activity	IPR025749:Sphingomyelin_synth-like_dom,IPR045221:Sphingomyelin_synth-like
AT2G05812	1.61991	9.14444e-06	0.000162044	ncRNA(AT2G05812)
AT1G26730	1.61728	4.73111e-11	7.20762e-09	EXS (ERD1/XPR1/SYG1) family protein(AT1G26730)	GO:0006817~phosphate ion transport	GO:0005886~plasma membrane		IPR004331:SPX_dom,IPR004342:EXS_C,IPR034092:PHO1_SPX
AT5G03350	1.61693	2.00804e-06	4.97336e-05	Legume lectin family protein(AT5G03350)	GO:0009617~response to bacterium,GO:0009627~systemic acquired resistance,GO:0071446~cellular response to salicylic acid stimulus	GO:0005576~extracellular region,GO:0005886~plasma membrane,GO:0009505~plant-type cell wall,GO:0048046~apoplast	GO:0003674~molecular_function,GO:0016301~kinase activity,GO:0030246~carbohydrate binding	IPR001220:Legume_lectin_dom,IPR013320:ConA-like_dom_sf,IPR016363:L-lectin,IPR050258:Leguminous_Lectin
AT2G20750	1.61536	7.63826e-10	7.3189e-08	expansin B1(EXPB1)	GO:0009653~anatomical structure morphogenesis,GO:0009826~unidimensional cell growth,GO:0009828~plant-type cell wall loosening,GO:0019953~sexual reproduction	GO:0005576~extracellular region,GO:0009507~chloroplast,GO:0016020~membrane	GO:0003674~molecular_function	IPR005795:LolPI,IPR007112:Expansin/allergen_DPBB_dom,IPR007117:Expansin_CBD,IPR007118:Expan_Lol_pI,IPR009009:RlpA-like_DPBB,IPR036749:Expansin_CBD_sf,IPR036908:RlpA-like_sf
AT2G28950	1.61396	1.10704e-09	9.97565e-08	expansin A6(EXPA6)	GO:0006949~syncytium formation,GO:0009653~anatomical structure morphogenesis,GO:0009664~plant-type cell wall organization,GO:0009826~unidimensional cell growth,GO:0009828~plant-type cell wall loosening	GO:0005576~extracellular region,GO:0009505~plant-type cell wall,GO:0016020~membrane	GO:0003674~molecular_function	IPR002963:Expansin,IPR007112:Expansin/allergen_DPBB_dom,IPR007117:Expansin_CBD,IPR007118:Expan_Lol_pI,IPR009009:RlpA-like_DPBB,IPR036749:Expansin_CBD_sf,IPR036908:RlpA-like_sf
AT3G25250	1.60929	1.03532e-05	0.000178098	AGC (cAMP-dependent, cGMP-dependent and protein kinase C) kinase family protein(AGC2-1)	GO:0006468~protein phosphorylation,GO:0006952~defense response,GO:0006979~response to oxidative stress,GO:0009611~response to wounding,GO:0043065~positive regulation of apoptotic process,GO:0071456~cellular response to hypoxia		GO:0004672~protein kinase activity,GO:0004674~protein serine/threonine kinase activity,GO:0004676~3-phosphoinositide-dependent protein kinase activity,GO:0004677~DNA-dependent protein kinase activity,GO:0004679~AMP-activated protein kinase activity,GO:0004694~eukaryotic translation initiation factor 2alpha kinase activity,GO:0004711~ribosomal protein S6 kinase activity,GO:0005515~protein binding,…	IPR000719:Prot_kinase_dom,IPR000961:AGC-kinase_C,IPR008271:Ser/Thr_kinase_AS,IPR011009:Kinase-like_dom_sf	ath04016:MAPK signaling pathway - plant
AT4G17240	1.60913	4.98499e-06	0.00010044	structural maintenance of chromosomes protein(AT4G17240)		GO:0005575~cellular_component	GO:0003674~molecular_function
AT3G28340	1.60903	2.64172e-05	0.000378125	galacturonosyltransferase-like 10(GATL10)	GO:0006979~response to oxidative stress,GO:0045489~pectin biosynthetic process,GO:0071555~cell wall organization	GO:0000139~Golgi membrane,GO:0009507~chloroplast,GO:0016020~membrane	GO:0016757~glycosyltransferase activity,GO:0047262~polygalacturonate 4-alpha-galacturonosyltransferase activity	IPR002495:Glyco_trans_8,IPR029044:Nucleotide-diphossugar_trans,IPR050748:Glycosyltrans_8_dom-fam
AT5G28640	1.60756	1.83305e-06	4.62104e-05	SSXT family protein(AN3)	GO:0009955~adaxial/abaxial pattern specification,GO:0010449~root meristem growth,GO:0010468~regulation of gene expression,GO:0048366~leaf development,GO:0048825~cotyledon development,GO:0051301~cell division	GO:0005634~nucleus	GO:0003713~transcription coactivator activity,GO:0005515~protein binding	IPR007726:SS18_N
AT5G24580	1.5992	2.28457e-07	8.26976e-06	Heavy metal transport/detoxification superfamily protein(AT5G24580)		GO:0005634~nucleus	GO:0046872~metal ion binding	IPR006121:HMA_dom,IPR036163:HMA_dom_sf,IPR044258:HIPP09-like
AT1G70710	1.59909	1.72568e-06	4.40942e-05	glycosyl hydrolase 9B1(GH9B1)	GO:0030245~cellulose catabolic process,GO:0042547~cell wall modification involved in multidimensional cell growth,GO:0071555~cell wall organization	GO:0005576~extracellular region,GO:0009507~chloroplast	GO:0008810~cellulase activity	IPR001701:Glyco_hydro_9,IPR008928:6-hairpin_glycosidase_sf,IPR012341:6hp_glycosidase-like_sf,IPR018221:Glyco_hydro_9_His_AS,IPR033126:Glyco_hydro_9_Asp/Glu_AS	ath00500:Starch and sucrose metabolism,ath01100:Metabolic pathways
AT2G42540	1.59556	3.11422e-06	6.98589e-05	cold-regulated 15a(COR15A)	GO:0006970~response to osmotic stress,GO:0007623~circadian rhythm,GO:0009409~response to cold,GO:0009414~response to water deprivation,GO:0009416~response to light stimulus,GO:0009631~cold acclimation,GO:0009644~response to high light intensity,GO:0009651~response to salt stress,GO:0009667~plastid inner membrane organization,GO:0009737~response to abscisic acid,GO:0009819~drought recovery,GO:0010…	GO:0005829~cytosol,GO:0009507~chloroplast,GO:0009570~chloroplast stroma,GO:0009941~chloroplast envelope	GO:0005534~galactose binding,GO:0008289~lipid binding
AT4G30410	1.59551	3.65753e-08	1.85291e-06	sequence-specific DNA binding transcription factor(AT4G30410)	GO:0006355~regulation of DNA-templated transcription,GO:0009740~gibberellic acid mediated signaling pathway,GO:0009742~brassinosteroid mediated signaling pathway,GO:0040008~regulation of growth	GO:0005634~nucleus,GO:0009507~chloroplast	GO:0000976~transcription cis-regulatory region binding,GO:0003700~DNA-binding transcription factor activity,GO:0005515~protein binding,GO:0046983~protein dimerization activity	IPR036638:HLH_DNA-bd_sf,IPR044549:bHLH_AtIBH1-like,IPR044660:IBH1-like
AT5G08640	1.59545	1.9859e-08	1.10376e-06	flavonol synthase 1(FLS1)	GO:0009733~response to auxin,GO:0009813~flavonoid biosynthetic process	GO:0005634~nucleus,GO:0005737~cytoplasm	GO:0005515~protein binding,GO:0016491~oxidoreductase activity,GO:0031418~L-ascorbic acid binding,GO:0045431~flavonol synthase activity,GO:0045486~flavanone 3-dioxygenase activity,GO:0046872~metal ion binding	IPR005123:Oxoglu/Fe-dep_dioxygenase_dom,IPR026992:DIOX_N,IPR027443:IPNS-like_sf,IPR044861:IPNS-like_FE2OG_OXY,IPR050231:Iron_ascorbate_oxido_reductase	ath00941:Flavonoid biosynthesis,ath01100:Metabolic pathways,ath01110:Biosynthesis of secondary metabolites
AT4G08870	1.58888	1.54906e-05	0.000247382	Arginase/deacetylase superfamily protein(ARGAH2)	GO:0000050~urea cycle,GO:0006560~proline metabolic process,GO:0006570~tyrosine metabolic process,GO:0006591~ornithine metabolic process,GO:0009445~putrescine metabolic process,GO:0009446~putrescine biosynthetic process,GO:0033389~putrescine biosynthetic process from arginine, via agmatine,GO:0050832~defense response to fungus	GO:0005739~mitochondrion,GO:0005829~cytosol,GO:0009570~chloroplast stroma	GO:0004053~arginase activity,GO:0008783~agmatinase activity,GO:0046872~metal ion binding,GO:0050897~cobalt ion binding	IPR006035:Ureohydrolase,IPR023696:Ureohydrolase_dom_sf	ath00220:Arginine biosynthesis,ath00330:Arginine and proline metabolism,ath01100:Metabolic pathways,ath01110:Biosynthesis of secondary metabolites,ath01230:Biosynthesis of amino acids,ath04148:Efferocytosis
AT5G22380	1.58821	3.74668e-05	0.000498678	NAC domain containing protein 90(NAC090)	GO:0006355~regulation of DNA-templated transcription	GO:0005634~nucleus	GO:0003677~DNA binding,GO:0003700~DNA-binding transcription factor activity,GO:0005515~protein binding	IPR003441:NAC-dom,IPR036093:NAC_dom_sf
AT5G44635	1.58744	2.44472e-06	5.7714e-05	minichromosome maintenance (MCM2/3/5) family protein(MCM6)	GO:0006270~DNA replication initiation	GO:0000347~THO complex,GO:0000785~chromatin,GO:0005634~nucleus,GO:0042555~MCM complex	GO:0003677~DNA binding,GO:0003678~DNA helicase activity,GO:0003689~DNA clamp loader activity,GO:0005515~protein binding,GO:0005524~ATP binding,GO:0009378~four-way junction helicase activity,GO:0016787~hydrolase activity,GO:0016887~ATP hydrolysis activity,GO:0036121~double-stranded DNA helicase activity,GO:0046872~metal ion binding,GO:0061749~forked DNA-dependent helicase activity,GO:0061775~cohes…	IPR001208:MCM_dom,IPR008049:MCM6,IPR012340:NA-bd_OB-fold,IPR018525:MCM_CS,IPR027417:P-loop_NTPase,IPR027925:MCM_N,IPR031327:MCM,IPR033762:MCM_OB,IPR041024:Mcm6_C,IPR041562:MCM_lid	ath03030:DNA replication
AT3G07320	1.58738	1.49073e-09	1.26271e-07	O-Glycosyl hydrolases family 17 protein(AT3G07320)	GO:0005975~carbohydrate metabolic process	GO:0009506~plasmodesma	GO:0042973~glucan endo-1,3-beta-D-glucosidase activity	IPR000490:Glyco_hydro_17,IPR012946:X8,IPR017853:Glycoside_hydrolase_SF,IPR044965:Glyco_hydro_17_plant
AT1G62440	1.58501	1.62475e-07	6.3014e-06	leucine-rich repeat/extensin 2(LRX2)	GO:0000902~cell morphogenesis,GO:0071555~cell wall organization	GO:0005576~extracellular region,GO:0005886~plasma membrane,GO:0009505~plant-type cell wall	GO:0005199~structural constituent of cell wall	IPR001611:Leu-rich_rpt,IPR013210:LRR_N_plant-typ,IPR032675:LRR_dom_sf,IPR051582:LRR_extensin-like_regulator
AT3G20260	1.58239	1.03286e-11	1.98835e-09	DUF1666 family protein (DUF1666)(AT3G20260)		GO:0005634~nucleus	GO:0003674~molecular_function	IPR012870:DUF1666
AT1G70090	1.58226	1.12677e-09	1.00716e-07	glucosyl transferase family 8(LGT8)	GO:0045489~pectin biosynthetic process,GO:0071555~cell wall organization	GO:0000139~Golgi membrane,GO:0005576~extracellular region,GO:0005794~Golgi apparatus,GO:0016020~membrane	GO:0016757~glycosyltransferase activity,GO:0047262~polygalacturonate 4-alpha-galacturonosyltransferase activity	IPR002495:Glyco_trans_8,IPR029044:Nucleotide-diphossugar_trans,IPR050748:Glycosyltrans_8_dom-fam
AT2G43550	1.58143	3.83694e-10	4.14546e-08	scorpion toxin-like knottin superfamily protein(AT2G43550)	GO:0008150~biological_process,GO:0031640~killing of cells of another organism,GO:0050832~defense response to fungus	GO:0005575~cellular_component,GO:0005576~extracellular region	GO:0019871~sodium channel inhibitor activity	IPR002061:Scorpion_toxinL/defensin,IPR003614:Scorpion_toxin-like,IPR036574:Scorpion_toxin-like_sf
AT5G65690	1.581	4.19348e-06	8.81552e-05	phosphoenolpyruvate carboxykinase 2(PCK2)	GO:0006094~gluconeogenesis	GO:0005737~cytoplasm	GO:0004612~phosphoenolpyruvate carboxykinase (ATP) activity,GO:0005524~ATP binding,GO:0016301~kinase activity,GO:0046872~metal ion binding	IPR001272:PEP_carboxykinase_ATP,IPR008210:PEP_carboxykinase_N,IPR013035:PEP_carboxykinase_C,IPR015994:PEPCK_ATP_CS	ath00010:Glycolysis / Gluconeogenesis,ath00020:Citrate cycle (TCA cycle),ath00620:Pyruvate metabolism,ath00710:Carbon fixation by Calvin cycle,ath01100:Metabolic pathways,ath01110:Biosynthesis of secondary metabolites,ath01200:Carbon metabolism
AT3G50800	1.57854	1.36449e-06	3.65291e-05	uncharacterized protein(AT3G50800)		GO:0005575~cellular_component	GO:0003674~molecular_function	IPR025322:PADRE_dom
AT5G62210	1.57811	2.73478e-08	1.44779e-06	Embryo-specific protein 3, (ATS3)(AT5G62210)	GO:0008150~biological_process	GO:0016020~membrane	GO:0003674~molecular_function	IPR010417:Embryo-specific_ATS3,IPR036392:PLAT/LH2_dom_sf
AT5G56980	1.57708	1.42251e-11	2.64237e-09	cotton fiber protein(AT5G56980)	GO:0009611~response to wounding,GO:0009617~response to bacterium,GO:0009753~response to jasmonic acid,GO:0042742~defense response to bacterium	GO:0009507~chloroplast,GO:0016020~membrane	GO:0003674~molecular_function	IPR008480:DUF761_pln,IPR025520:DUF4408
AT1G04517	1.57368	7.27051e-07	2.15933e-05
AT2G38620	1.57355	0.000100054	0.00109723	cyclin-dependent kinase B1;2(CDKB1;2)	GO:0010444~guard mother cell differentiation,GO:0032875~regulation of DNA endoreduplication,GO:0051726~regulation of cell cycle,GO:1902806~regulation of cell cycle G1/S phase transition,GO:2000037~regulation of stomatal complex patterning	GO:0000307~cyclin-dependent protein kinase holoenzyme complex,GO:0005634~nucleus	GO:0004674~protein serine/threonine kinase activity,GO:0004693~cyclin-dependent protein serine/threonine kinase activity,GO:0005515~protein binding,GO:0005524~ATP binding,GO:0030332~cyclin binding,GO:0106310~protein serine kinase activity,GO:0140833~RNA polymerase II CTD heptapeptide repeat Y1 kinase activity,GO:0140834~RNA polymerase II CTD heptapeptide repeat S2 kinase activity,GO:0140835~RNA p…	IPR000719:Prot_kinase_dom,IPR008271:Ser/Thr_kinase_AS,IPR011009:Kinase-like_dom_sf,IPR017441:Protein_kinase_ATP_BS,IPR050108:CDK
AT5G16360	1.57254	2.35668e-06	5.64342e-05	NC domain-containing protein-like protein(AT5G16360)		GO:0005575~cellular_component	GO:0003674~molecular_function	IPR007053:LRAT_dom
AT3G48100	1.57093	1.49072e-07	5.85669e-06	response regulator 5(RR5)	GO:0000160~phosphorelay signal transduction system,GO:0006355~regulation of DNA-templated transcription,GO:0007623~circadian rhythm,GO:0009735~response to cytokinin,GO:0009736~cytokinin-activated signaling pathway,GO:0010114~response to red light	GO:0005634~nucleus,GO:0005737~cytoplasm	GO:0000156~phosphorelay response regulator activity,GO:0005515~protein binding	IPR001789:Sig_transdc_resp-reg_receiver,IPR011006:CheY-like_superfamily,IPR045279:ARR-like	ath04075:Plant hormone signal transduction
AT1G17420	1.56802	3.38103e-05	0.000460429	lipoxygenase 3(LOX3)	GO:0006633~fatty acid biosynthetic process,GO:0006952~defense response,GO:0009555~pollen development,GO:0009611~response to wounding,GO:0009620~response to fungus,GO:0009644~response to high light intensity,GO:0009695~jasmonic acid biosynthetic process,GO:0009753~response to jasmonic acid,GO:0009901~anther dehiscence,GO:0031408~oxylipin biosynthetic process,GO:0034440~lipid oxidation,GO:0048653~a…	GO:0009507~chloroplast	GO:0016165~linoleate 13S-lipoxygenase activity,GO:0016702~oxidoreductase activity, acting on single donors with incorporation of molecular oxygen, incorporation of two atoms of oxygen,GO:0046872~metal ion binding	IPR000907:LipOase,IPR001024:PLAT/LH2_dom,IPR001246:LipOase_plant,IPR013819:LipOase_C,IPR020833:LipOase_Fe_BS,IPR020834:LipOase_CS,IPR027433:Lipoxygenase_dom_3,IPR036226:LipOase_C_sf,IPR036392:PLAT/LH2_dom_sf,IPR042057:Lipoxy_PLAT/LH2	ath00591:Linoleic acid metabolism,ath00592:alpha-Linolenic acid metabolism,ath01100:Metabolic pathways,ath01110:Biosynthesis of secondary metabolites
AT4G23190	1.56708	1.07534e-16	6.69744e-14	cysteine-rich RLK (RECEPTOR-like protein kinase) 11(CRK11)	GO:0006979~response to oxidative stress,GO:0042742~defense response to bacterium	GO:0005634~nucleus,GO:0016020~membrane	GO:0004672~protein kinase activity,GO:0004674~protein serine/threonine kinase activity,GO:0005524~ATP binding,GO:0016301~kinase activity,GO:0106310~protein serine kinase activity	IPR000719:Prot_kinase_dom,IPR001245:Ser-Thr/Tyr_kinase_cat_dom,IPR002902:GNK2,IPR008271:Ser/Thr_kinase_AS,IPR011009:Kinase-like_dom_sf,IPR017441:Protein_kinase_ATP_BS,IPR038408:GNK2_sf
AT3G05800	1.56643	1.74909e-06	4.4625e-05	AtBS1(activation-tagged BRI1 suppressor 1)-interacting factor 1(AIF1)	GO:0006355~regulation of DNA-templated transcription,GO:0009742~brassinosteroid mediated signaling pathway	GO:0005634~nucleus	GO:0000976~transcription cis-regulatory region binding,GO:0003700~DNA-binding transcription factor activity,GO:0046983~protein dimerization activity	IPR011598:bHLH_dom,IPR036638:HLH_DNA-bd_sf,IPR044549:bHLH_AtIBH1-like,IPR044660:IBH1-like
AT5G57010	1.56504	9.83407e-05	0.00108124	calmodulin-binding family protein(AT5G57010)		GO:0005634~nucleus,GO:0005737~cytoplasm	GO:0003674~molecular_function	IPR044159:IQM
AT5G12940	1.55707	2.3788e-05	0.00034932	Leucine-rich repeat (LRR) family protein(AT5G12940)	GO:0007165~signal transduction	GO:0005886~plasma membrane	GO:0003674~molecular_function	IPR001611:Leu-rich_rpt,IPR013210:LRR_N_plant-typ,IPR032675:LRR_dom_sf,IPR053211:DNA_repair-toleration
AT1G01560	1.55598	3.33607e-05	0.00045636	MAP kinase 11(MPK11)	GO:0007165~signal transduction,GO:0009737~response to abscisic acid	GO:0005634~nucleus,GO:0005829~cytosol,GO:0005886~plasma membrane	GO:0004705~JUN kinase activity,GO:0004707~MAP kinase activity,GO:0005515~protein binding,GO:0005524~ATP binding,GO:0106310~protein serine kinase activity	IPR000719:Prot_kinase_dom,IPR003527:MAP_kinase_CS,IPR008271:Ser/Thr_kinase_AS,IPR011009:Kinase-like_dom_sf,IPR017441:Protein_kinase_ATP_BS,IPR050117:MAP_kinase	ath04016:MAPK signaling pathway - plant,ath04626:Plant-pathogen interaction
AT3G55840	1.54957	1.48297e-06	3.88714e-05	Hs1pro-1 protein(AT3G55840)	GO:0006952~defense response,GO:0019441~L-tryptophan catabolic process to kynurenine	GO:0005737~cytoplasm,GO:0005739~mitochondrion	GO:0005515~protein binding,GO:0020037~heme binding,GO:0046872~metal ion binding	IPR009743:Hs1pro-1_C,IPR009869:HSPRO1_N,IPR037217:Trp/Indoleamine_2_3_dOase-like,IPR038759:HSPRO1/HSPRO2
AT5G39220	1.54572	5.56936e-05	0.000681715	alpha/beta-Hydrolases superfamily protein(AT5G39220)	GO:0010189~vitamin E biosynthetic process	GO:0009507~chloroplast,GO:0009941~chloroplast envelope	GO:0016787~hydrolase activity,GO:0016788~hydrolase activity, acting on ester bonds	IPR000073:AB_hydrolase_1,IPR029058:AB_hydrolase_fold
AT5G45960	1.54109	7.97765e-06	0.000146241	GDSL-like Lipase/Acylhydrolase superfamily protein(AT5G45960)	GO:0016042~lipid catabolic process	GO:0005576~extracellular region	GO:0016788~hydrolase activity, acting on ester bonds	IPR001087:GDSL,IPR035669:SGNH_plant_lipase-like,IPR036514:SGNH_hydro_sf,IPR050592:GDSL_lipolytic_enzyme
AT1G77640	1.53685	2.02733e-08	1.12325e-06	Integrase-type DNA-binding superfamily protein(AT1G77640)	GO:0006355~regulation of DNA-templated transcription,GO:0009873~ethylene-activated signaling pathway	GO:0005634~nucleus	GO:0000976~transcription cis-regulatory region binding,GO:0003677~DNA binding,GO:0003700~DNA-binding transcription factor activity	IPR001471:AP2/ERF_dom,IPR016177:DNA-bd_dom_sf,IPR036955:AP2/ERF_dom_sf,IPR051032:AP2/ERF_TF_ERF_subfamily
AT4G25470	1.53657	0.000129596	0.00134724	C-repeat/DRE binding factor 2(CBF2)	GO:0006355~regulation of DNA-templated transcription,GO:0009409~response to cold,GO:0009631~cold acclimation	GO:0005634~nucleus	GO:0000976~transcription cis-regulatory region binding,GO:0003677~DNA binding,GO:0003700~DNA-binding transcription factor activity,GO:0005515~protein binding	IPR001471:AP2/ERF_dom,IPR016177:DNA-bd_dom_sf,IPR036955:AP2/ERF_dom_sf,IPR045277:DRE1A-I
AT5G26670	1.5349	5.48595e-08	2.62236e-06	Pectinacetylesterase family protein(AT5G26670)	GO:0071555~cell wall organization	GO:0005576~extracellular region	GO:0016787~hydrolase activity	IPR004963:PAE/NOTUM
AT1G54000	1.53412	5.72553e-05	0.000697605	GDSL-like Lipase/Acylhydrolase superfamily protein(GLL22)	GO:0016042~lipid catabolic process	GO:0000325~plant-type vacuole,GO:0005576~extracellular region,GO:0005774~vacuolar membrane,GO:0009506~plasmodesma	GO:0016788~hydrolase activity, acting on ester bonds	IPR001087:GDSL,IPR035669:SGNH_plant_lipase-like,IPR036514:SGNH_hydro_sf,IPR044552:GLIP1-5/GLL25
AT3G03280	1.53375	1.13421e-05	0.000191836	uncharacterized protein(AT3G03280)	GO:0009620~response to fungus,GO:0071456~cellular response to hypoxia	GO:0005634~nucleus	GO:0003674~molecular_function	IPR025322:PADRE_dom
AT5G41550	1.52938	4.79376e-08	2.33362e-06	Disease resistance protein (TIR-NBS-LRR class) family(AT5G41550)	GO:0006952~defense response,GO:0007165~signal transduction	GO:0005575~cellular_component	GO:0016887~ATP hydrolysis activity,GO:0043531~ADP binding	IPR000157:TIR_dom,IPR002182:NB-ARC,IPR003593:AAA+_ATPase,IPR011713:Leu-rich_rpt_3,IPR027417:P-loop_NTPase,IPR032675:LRR_dom_sf,IPR035897:Toll_tir_struct_dom_sf,IPR036390:WH_DNA-bd_sf,IPR042197:Apaf_helical,IPR044974:Disease_R_plants
AT1G20190	1.52828	2.62047e-07	9.24851e-06	expansin 11(EXPA11)	GO:0009653~anatomical structure morphogenesis,GO:0009664~plant-type cell wall organization,GO:0009826~unidimensional cell growth,GO:0009828~plant-type cell wall loosening	GO:0005576~extracellular region,GO:0009505~plant-type cell wall,GO:0016020~membrane	GO:0003674~molecular_function	IPR002963:Expansin,IPR007112:Expansin/allergen_DPBB_dom,IPR007117:Expansin_CBD,IPR007118:Expan_Lol_pI,IPR009009:RlpA-like_DPBB,IPR036749:Expansin_CBD_sf,IPR036908:RlpA-like_sf
AT3G02820	1.52723	7.23141e-06	0.000136118	zinc knuckle (CCHC-type) family protein(AT3G02820)	GO:0000076~DNA replication checkpoint signaling,GO:0006974~DNA damage response,GO:0031297~replication fork processing,GO:0043111~replication fork arrest	GO:0005634~nucleus,GO:0031298~replication fork protection complex	GO:0003676~nucleic acid binding,GO:0003677~DNA binding,GO:0008270~zinc ion binding	IPR001878:Znf_CCHC,IPR012923:Csm3,IPR036875:Znf_CCHC_sf,IPR040038:TIPIN/Csm3/Swi3
AT3G54260	1.52564	4.4391e-05	0.000569362	TRICHOME BIREFRINGENCE-LIKE 36(TBL36)	GO:0008150~biological_process	GO:0016020~membrane	GO:0016413~O-acetyltransferase activity	IPR025846:TBL_N,IPR026057:TBL_C,IPR029962:TBL
AT5G37950	1.5218	2.67492e-08	1.4268e-06	UDP-Glycosyltransferase superfamily protein(AT5G37950)		GO:0009507~chloroplast	GO:0035251~UDP-glucosyltransferase activity	IPR002213:UDP_glucos_trans
AT3G02550	1.52112	5.79457e-15	2.6183e-12	LOB domain-containing protein 41(LBD41)	GO:0006355~regulation of DNA-templated transcription,GO:0071456~cellular response to hypoxia	GO:0005634~nucleus	GO:0001217~DNA-binding transcription repressor activity	IPR004883:LOB,IPR017414:LOBD
AT3G03850	1.51969	2.97253e-05	0.000416036	SAUR-like auxin-responsive protein family(SAUR26)	GO:0009266~response to temperature stimulus,GO:0009642~response to light intensity,GO:0009734~auxin-activated signaling pathway	GO:0005886~plasma membrane,GO:0009507~chloroplast	GO:0003674~molecular_function	IPR003676:SAUR_fam	ath04075:Plant hormone signal transduction
AT4G02800	1.51826	2.07661e-05	0.000313207	GRIP/coiled-coil protein(AT4G02800)		GO:0005634~nucleus	GO:0080115~myosin XI tail binding
[truncated: 422 more rows]

## Sheet: 35S AXE XYL RNAseq _downregulat
Gene_ID	log2FoldChange	pvalue	padj	Gene.Name	COG_ONTOLOGY	GOTERM_BP_DIRECT	INTERPRO	KEGG_PATHWAY
[truncated: 107 more rows]
